# Supplementary material for: Immunomics-guided discovery of serum and urine antibodies for diagnosing urogenital schistosomiasis: a biomarker identification study
Source: PubMed Central journal article supplement — Lancet Microbe. 2021 Nov;2(11):e617–26. doi: 10.1016/S2666-5247(21)00150-6 (PMC8683377; doi:10.1016/s2666-5247(21)00150-6), 2021-11
Supplement: mmc1.pdf [file mmc1.pdf]

# THE LANCET

## Microbe

### Supplementary appendix

This appendix formed part of the original submission and has been peer reviewed. We post it as supplied by the authors.

Supplement to: Pearson MS, Tedla BA, Mekonnen GG, et al. Immunomics-guided discovery of serum and urine antibodies for diagnosing urogenital schistosomiasis: a biomarker identification study. *Lancet Microbe* 2021; published online August 31. [https://doi.org/10.1016/S2666-5247\(21\)00150-6](https://doi.org/10.1016/S2666-5247(21)00150-6).

## Appendix and supplementary materials table of contents

|                                                                                                                                                                                                                                                         |    |
|---------------------------------------------------------------------------------------------------------------------------------------------------------------------------------------------------------------------------------------------------------|----|
| <b>Table 1.</b> Serum and urine sample cohorts used in this study.                                                                                                                                                                                      | 3  |
| <b>Table 2.</b> Top 20 antigens with significantly higher IgG responses in the serum and urine of infected versus non-infected individuals.                                                                                                             | 4  |
| <b>Table 3.</b> Subset of arrayed antigens inducing an antibody signature able to most effectively discriminate between infected and non-infected populations using sera or urine.                                                                      | 6  |
| <b>Table 4:</b> Diagnostic accuracy of antigens using serum of individuals from <i>Schistosoma haematobium</i> endemic populations determined by ELISA.                                                                                                 | 7  |
| <b>Table 5:</b> Diagnostic accuracy of antigens using urine of individuals from <i>Schistosoma haematobium</i> endemic populations determined by ELISA.                                                                                                 | 7  |
| <b>Materials and methods</b>                                                                                                                                                                                                                            | 8  |
| <b>References</b>                                                                                                                                                                                                                                       | 14 |
| <b>Table S1.</b> Antigens used in construction of the <i>S. haematobium</i> protein microarray                                                                                                                                                          | 15 |
| <b>Table S2.</b> Fold change of IgG responses between infected and non-infected ( <i>S. haematobium</i> -endemic) populations resulting from serum sample probing of <i>S. haematobium</i> protein microarrays.                                         | 40 |
| <b>Table S3.</b> Fold change of IgG responses between infected and non-infected ( <i>S. haematobium</i> -endemic) populations resulting from urine sample probing of <i>S. haematobium</i> protein microarrays.                                         | 67 |
| <b>Figure S1.</b> Schematic of PoC-ICT design.                                                                                                                                                                                                          | 94 |
| <b>Figure S2.</b> Scatterplot showing correlation of <i>S. haematobium</i> infection intensity (urine egg burden) with individual mean SI of all spots resulting from probing of <i>S. haematobium</i> protein arrays with different diagnostic fluids. | 95 |
| <b>Figure S3.</b> Receiver operating characteristic curve showing diagnostic performance (area under the curve - AUC) of the minimal antibody signature in each diagnostic fluid.                                                                       | 96 |
| <b>Figure S4.</b> Amino acid alignment and percent identity matrix of <i>S. haematobium</i> TSPs.                                                                                                                                                       | 97 |
| <b>Figure S5.</b> Antibody responses to combinations of cell-based recombinant versions of top-ranked proteins generated by ELISA with human urine from <i>S. haematobium</i> -endemic populations.                                                     | 98 |
| <b>Table S4.</b> Diagnostic accuracy of antigen combinations using urine of individuals from <i>Schistosoma haematobium</i> -endemic populations determined by ELISA.                                                                                   | 99 |

|                                                                                                                                                                                                                                                                          |     |
|--------------------------------------------------------------------------------------------------------------------------------------------------------------------------------------------------------------------------------------------------------------------------|-----|
| <b>Figure S6.</b> Frequency of recognition (FoR) patterns based on IgG ELISA responses to combinations of cell-based recombinant versions of top-ranked proteins and <i>Sh</i> -SEA using urine from infected individuals in <i>S. haematobium</i> -endemic populations. | 100 |
| <b>Figure S7.</b> Serum IgG ELISAs showing recognition of <i>S. haematobium</i> diagnostic antigens by other schistosome species.                                                                                                                                        | 101 |
| <b>Figure S8.</b> Amino acid alignment of <i>S. haematobium</i> diagnostic antigens and homologs from <i>S. mansoni</i> , <i>S. japonicum</i> and <i>H. sapiens</i> .                                                                                                    | 102 |

**Table 1. Serum and urine sample cohorts used in this study.**

| Country                             | Sample | Cohort size (n) | Egg burden |                                |                               |                            |                                   |                                   | Study component* |   |     |    |
|-------------------------------------|--------|-----------------|------------|--------------------------------|-------------------------------|----------------------------|-----------------------------------|-----------------------------------|------------------|---|-----|----|
|                                     |        |                 | Range      | Heavy <sup>&amp;</sup> (n [%]) | Moderate <sup>#</sup> (n [%]) | Light <sup>^</sup> (n [%]) | Egg negative/CAA positive (n [%]) | Egg negative/CAA negative (n [%]) | A                | E | ICT | SS |
| Mashonaland East province, Zimbabwe | serum  | 201             | 0.3-743    | 64 [31.8]                      | N/A                           | 137 [68.2]                 | 0 [0.0]                           | 0 [0.0]                           | ✓                | ✓ |     |    |
| Lambarene, Gabon                    | serum  | 56              | 0-1265     | 13 [23.2]                      | N/A                           | 25 [44.6]                  | 4 [7.1]                           | 14 [25.0]                         | ✓                | ✓ | ✓   | ✓  |
| Mashonaland East province, Zimbabwe | urine  | 97              | 0-1008     | 31 [32.0]                      | N/A                           | 59 [60.8]                  | 6 [6.2]                           | 1 [1.0]                           | ✓                | ✓ |     |    |
| Lambarene, Gabon                    | urine  | 27              | 0-1265     | 5 [18.5]                       | N/A                           | 12 [44.4]                  | 0 [0.0]                           | 10 [37.0]                         | ✓                |   |     |    |
| Pemba/Unjuga islands, Zanzibar      | urine  | 152             | 0-540      | 7 [4.6]                        | N/A                           | 60 [39.5]                  | 4 [2.6]                           | 81 [53.3]                         |                  | ✓ |     |    |
| Northern Samar, The Philippines     | serum  | 21              | 24-5616    | 134 [58.3]                     | 54 [23.5]                     | 42 [18.3]                  | 0 [0.0]                           | 0 [0.0]                           |                  |   |     | ✓  |
| Gondar, Ethiopia                    | serum  | 230             | 10-650     | 3 [14.3]                       | 8 [38.1]                      | 10 [43.5]                  | 0 [0.0]                           | 0 [0.0]                           |                  |   |     | ✓  |
| Cairns, Australia                   | urine  | 15              | -          | -                              | -                             | -                          | -                                 | -                                 | ✓                | ✓ |     |    |
| Leiden, The Netherlands             | serum  | 10              | -          | -                              | -                             | -                          | -                                 | -                                 | ✓                | ✓ | ✓   | ✓  |

\*A = array, E = ELISA, ICT = immunochromatographic test, SS = species specificity.

<sup>&</sup>For *S. haematobium* infection, heavy egg burden  $\geq 50$  eggs/10 ml urine; for *S. mansoni* and *S. japonicum* infection, heavy egg burden  $>400$  eggs per gram faeces.

<sup>#</sup>As per WHO guidelines, *S. haematobium* infection is grouped into only heavy or light egg burden; for *S. mansoni* and *S. japonicum* infection, moderate egg burden = 101-400 eggs per gram faeces.

<sup>^</sup>For *S. haematobium* infection, light egg burden = 1-49 eggs/10 ml urine; for *S. mansoni* and *S. japonicum* infection, light egg burden = 1-100 eggs per gram faeces.

**Table 2. Top 20 antigens with significantly higher IgG responses in the serum and urine of infected versus non-infected individuals.**

| Antigen<br>(WBPS14 <sup>s</sup> Accession) | Description <sup>#</sup>                              | <i>P</i> value          | fd <sup>r</sup> *       | Selection method for array inclusion <sup>^</sup> |
|--------------------------------------------|-------------------------------------------------------|-------------------------|-------------------------|---------------------------------------------------|
| <b>Serum</b>                               |                                                       |                         |                         |                                                   |
| MS3_10186                                  | IPSE <sup>#</sup>                                     | 3.2 x 10 <sup>-22</sup> | 2.5 x 10 <sup>-20</sup> | bioinformatic                                     |
| MS3_10385                                  | neuroserpin <sup>#</sup>                              | 3.2 x 10 <sup>-20</sup> | 1.6 x 10 <sup>-17</sup> | proteomic (T, AES, EV)                            |
| MS3_02553                                  | saposin containing protein <sup>#</sup>               | 1.1 x 10 <sup>-17</sup> | 3.8 x 10 <sup>-15</sup> | proteomic (T, EV)                                 |
| MS3_09207                                  | hemoglobinase (C13 family) <sup>#</sup>               | 4.2 x 10 <sup>-17</sup> | 1.0 x 10 <sup>-14</sup> | proteomic (EV)                                    |
| MS3_09198                                  | CD63 antigen <sup>#</sup>                             | 2.9 x 10 <sup>-16</sup> | 5.8 x 10 <sup>-14</sup> | proteomic (T, EV)                                 |
| MS3_07972                                  | ferritin, heavy polypeptide 1                         | 7.1 x 10 <sup>-16</sup> | 1.2 x 10 <sup>-13</sup> | proteomic (AES, EV)                               |
| MS3_01370                                  | CD63 antigen                                          | 3.1 x 10 <sup>-15</sup> | 3.8 x 10 <sup>-13</sup> | proteomic (T, EV)                                 |
| MS3_05950                                  | 16 kDa calcium-binding protein <sup>#</sup>           | 1.0 x 10 <sup>-13</sup> | 1.0 x 10 <sup>-11</sup> | proteomic (T, AES, EES)                           |
| MS3_06828                                  | calcium-binding mitochondrial carrier protein SCaMC-1 | 1.3 x 10 <sup>-12</sup> | 1.0 x 10 <sup>-10</sup> | proteomic (T)                                     |
| MS3_01658                                  | phospholipase D3                                      | 5.5 x 10 <sup>-11</sup> | 4.2 x 10 <sup>-9</sup>  | proteomic (AES, EV)                               |
| MS3_06368                                  | 5'-AMP-activated protein kinase subunit beta-1        | 6.9 x 10 <sup>-11</sup> | 4.7 x 10 <sup>-9</sup>  | bioinformatic                                     |
| MS3_07892                                  | guanine nucleotide-binding protein subunit beta       | 1.5 x 10 <sup>-10</sup> | 9.5 x 10 <sup>-9</sup>  | proteomic (T)                                     |
| MS3_01466                                  | band 7 protein                                        | 6.4 x 10 <sup>-10</sup> | 3.5 x 10 <sup>-8</sup>  | bioinformatic                                     |
| MS3_00180                                  | putative programmed cell death protein                | 8.4 x 10 <sup>-10</sup> | 4.4 x 10 <sup>-8</sup>  | proteomic (T, EV)                                 |
| MS3_08105                                  | peptidyl-prolyl cis-trans isomerase B                 | 1.1 x 10 <sup>-9</sup>  | 5.7 x 10 <sup>-8</sup>  | bioinformatic                                     |
| MS3_06193                                  | PUR-alpha-like protein <sup>#</sup>                   | 1.8 x 10 <sup>-9</sup>  | 8.5 x 10 <sup>-8</sup>  | proteomic (AES)                                   |
| MS3_09175                                  | aquaporin-3 (AQP-3)                                   | 3.4 x 10 <sup>-9</sup>  | 1.5 x 10 <sup>-7</sup>  | proteomic (T, EV)                                 |
| MS3_09779                                  | cathepsin B-like peptidase (C01 family)               | 7.6 x 10 <sup>-9</sup>  | 3.0 x 10 <sup>-7</sup>  | proteomic (EV)                                    |
| MS3_09828                                  | Rho GDP-dissociation inhibitor 2                      | 9.3 x 10 <sup>-9</sup>  | 3.3 x 10 <sup>-7</sup>  | bioinformatic                                     |
| MS3_10252                                  | steroid dehydrogenase, putative                       | 1.2 x 10 <sup>-8</sup>  | 4.3 x 10 <sup>-7</sup>  | bioinformatic                                     |
| <b>Urine</b>                               |                                                       |                         |                         |                                                   |
| MS3_10385                                  | neuroserpin <sup>#</sup>                              | 4.2 x 10 <sup>-11</sup> | 4.2 x 10 <sup>-11</sup> | proteomic (T,A ES, EV)                            |

|           |                                                      |                        |                        |                             |
|-----------|------------------------------------------------------|------------------------|------------------------|-----------------------------|
| MS3_06193 | PUR-alpha-like protein <sup>#</sup>                  | 1.8 x 10 <sup>-7</sup> | 1.8 x 10 <sup>-7</sup> | proteomic (AES)             |
| MS3_10186 | IPSE/alpha <sup>#</sup>                              | 1.8 x 10 <sup>-7</sup> | 1.8 x 10 <sup>-7</sup> | bioinformatic               |
| MS3_02553 | saposin containing protein <sup>#</sup>              | 4.3 x 10 <sup>-6</sup> | 4.3 x 10 <sup>-6</sup> | proteomic (T, EV)           |
| MS3_01466 | band 7 protein                                       | 3.5 x 10 <sup>-8</sup> | 3.5 x 10 <sup>-8</sup> | bioinformatic               |
| MS3_07702 | troponin T                                           | 2.0 x 10 <sup>-5</sup> | 2.0 x 10 <sup>-5</sup> | proteomic (T, AES, EV)      |
| MS3_04688 | zinc finger CDGSH domain-containing protein 1        | 7.7 x 10 <sup>-5</sup> | 7.7 x 10 <sup>-5</sup> | proteomic (T)               |
| MS3_00996 | sh3 domain grb2-like protein B1 (endophilin B1)      | 8.6 x 10 <sup>-5</sup> | 8.6 x 10 <sup>-5</sup> | proteomic (T, AES, EV)      |
| MS3_09198 | CD63 antigen <sup>#</sup>                            | 8.6 x 10 <sup>-5</sup> | 8.6 x 10 <sup>-5</sup> | proteomic (T, EV)           |
| MS3_07481 | fimbrin, putative                                    | 1.2 x 10 <sup>-3</sup> | 1.2 x 10 <sup>-3</sup> | proteomic (T, AES, EV)      |
| MS3_09207 | hemoglobinase (C13 family) <sup>#</sup>              | 1.3 x 10 <sup>-3</sup> | 1.3 x 10 <sup>-3</sup> | proteomic (EV)              |
| MS3_07178 | putative ferritin                                    | 2.3 x 10 <sup>-3</sup> | 2.3 x 10 <sup>-3</sup> | proteomic (T, AES, EES, EV) |
| MS3_05950 | 16 kDa calcium-binding protein <sup>#</sup>          | 3.6 x 10 <sup>-3</sup> | 3.6 x 10 <sup>-3</sup> | proteomic (T, AES, EES)     |
| MS3_02428 | cytochrome b-c1 complex subunit 7                    | 3.6 x 10 <sup>-3</sup> | 3.6 x 10 <sup>-3</sup> | proteomic (T)               |
| MS3_00180 | putative programmed cell death protein               | 3.7 x 10 <sup>-3</sup> | 3.7 x 10 <sup>-3</sup> | proteomic (T, EV)           |
| MS3_01257 | BC026374 protein (S09 family)                        | 4.1 x 10 <sup>-3</sup> | 4.1 x 10 <sup>-3</sup> | bioinformatic               |
| MS3_01857 | paramyosin isoform 1                                 | 4.5 x 10 <sup>-3</sup> | 4.5 x 10 <sup>-3</sup> | Proteomic (EES)             |
| MS3_04820 | putative zinc transporter                            | 4.5 x 10 <sup>-3</sup> | 4.5 x 10 <sup>-3</sup> | bioinformatic               |
| MS3_03509 | protein jagged-1b                                    | 4.9 x 10 <sup>-3</sup> | 4.9 x 10 <sup>-3</sup> | bioinformatic               |
| MS3_09779 | cathepsin B-like peptidase (C01 family) <sup>#</sup> | 5.1 x 10 <sup>-3</sup> | 5.1 x 10 <sup>-3</sup> | proteomic (EV)              |

<sup>s</sup>WormBase ParaSite online database, version 14 [https://parasite.wormbase.org/Schistosoma\\_haematobium\\_prjna78265/Info/Index/](https://parasite.wormbase.org/Schistosoma_haematobium_prjna78265/Info/Index/)

<sup>#</sup>hits common to serum and urine.

\*false discovery rate.

<sup>^</sup>proteins for array inclusion selected from bioinformatic analysis of second-generation *S. mansoni* array<sup>12</sup> or proteomic analysis of *S. haematobium* T,<sup>17</sup> ES,<sup>17</sup> EES,<sup>17</sup> SEA<sup>17</sup> or EV.<sup>16</sup>

T = adult tegument, AES = adult excretory/secretory products, EES = egg excretory/secretory products, SEA = soluble egg antigen, EV = adult extracellular vesicles.

**Table 3. Subset of arrayed antigens inducing an antibody signature<sup>#</sup> able to most effectively discriminate between infected and non-infected populations using sera or urine.**

| Antigen<br>(WBPS14 <sup>s</sup><br>accession) | Description                                          | Serum IgG response       |                           |                               | Urine IgG response       |                           |                               |
|-----------------------------------------------|------------------------------------------------------|--------------------------|---------------------------|-------------------------------|--------------------------|---------------------------|-------------------------------|
|                                               |                                                      | Fold change <sup>^</sup> | Infected (%) <sup>*</sup> | AUC <sup>&amp;</sup> (95% CI) | Fold change <sup>^</sup> | Infected (%) <sup>*</sup> | AUC <sup>&amp;</sup> (95% CI) |
| MS3_10385                                     | neuroserpin <sup>+</sup>                             | 47.47                    | 81.07                     | 0.88 (0.83-0.92)              | 90.02                    | 91.15                     | 0.93 (0.85-1.00)              |
| MS3_10186                                     | IPSE                                                 | 14.59                    | 95.47                     | 0.88 (0.83-0.92)              | 50.96                    | 87.61                     | 0.88 (0.80-0.97)              |
| MS3_06193                                     | PUR-alpha-like protein                               | 8.58                     | 53.09                     | 0.71 (0.64-0.79)              | 29.67                    | 79.65                     | 0.83 (0.75-0.91)              |
| MS3_01466                                     | band 7 protein                                       | 3.71                     | 66.26                     | 0.69 (0.62-0.75)              | 12.18                    | 52.21                     | 0.75 (0.66-0.84)              |
| MS3_05950                                     | 16 kDa calcium-binding protein                       | 4.18                     | 69.55                     | 0.76 (0.70-0.82)              | 5.64                     | 56.64                     | 0.72 (0.62-0.82)              |
| MS3_09198                                     | CD63 antigen <sup>+</sup>                            | 4.81                     | 95.88                     | 0.79 (0.73-0.85)              | 7.39                     | 91.15                     | 0.83 (0.73-0.92)              |
| MS3_09779                                     | cathepsin B-like peptidase (C01 family) <sup>+</sup> | 8.85                     | 32.92                     | 0.84 (0.76-0.93)              | 2.56                     | 26.55                     | 0.66 (0.55-0.76)              |
| MS3_07972                                     | ferritin, heavy polypeptide 1 <sup>+</sup>           | 13.33                    | 55.97                     | 0.86 (0.80-0.92)              | 2.36                     | 45.13                     | 0.65 (0.54-0.76)              |
| MS3_09207                                     | hemoglobinase (C13 family) <sup>+</sup>              | 5.31                     | 30.45                     | 0.78 (0.71-0.84)              | 2.97                     | 34.51                     | 0.68 (0.57-0.78)              |
| MS3_01370                                     | CD63 antigen <sup>+</sup>                            | 4.53                     | 32.51                     | 0.78 (0.71-0.84)              | 2.23                     | 38.05                     | 0.66 (0.56-0.77)              |

<sup>#</sup> A minimum of four antigens is predicted to achieve the most effective discrimination between infected and non-infected populations using sera or urine.

<sup>s</sup> WormBase ParaSite online database, version 14 [https://parasite.wormbase.org/Schistosoma\\_haematobium\\_prjna78265/Info/Index/](https://parasite.wormbase.org/Schistosoma_haematobium_prjna78265/Info/Index/)

<sup>+</sup> Antigens were identified from proteomic analysis of *S. haematobium* EVs.<sup>16</sup>

<sup>^</sup> mean of the log<sub>2</sub>-transformed fold change of the signal intensity between the infected and non-infected population

<sup>\*</sup> Percentage of infected population samples (positive by egg microscopy or CAA) that are positive by array probing.

<sup>&</sup> Area under the curve (AUC) value determined from receiver-operator characteristic (ROC) curve analysis of the IgG response to each antigen.

**Table 4: Diagnostic accuracy of antigens using serum of individuals from *Schistosoma haematobium*-endemic populations determined by ELISA.**

| Antigen         | AUC in cohort (95% CI) |                  |                  |
|-----------------|------------------------|------------------|------------------|
|                 | Zimbabwe               | Gabon            | All              |
| MS3_10385       | 0.79 (0.68-0.91)       | 0.83 (0.71-0.95) | 0.80 (0.70-0.91) |
| MS3_10186       | 0.85 (0.78-0.92)       | 0.98 (0.94-1.00) | 0.88 (0.82-0.94) |
| MS3_09198       | 0.82 (0.73-0.91)       | 0.86 (0.75-0.96) | 0.82 (0.74-0.91) |
| MS3_01370       | 0.93 (0.88-0.98)       | 0.95 (0.88-1.00) | 0.93 (0.89-0.97) |
| <i>Sh</i> -TSP2 | 0.97 (0.94-1.00)       | 1.00 (1.00-1.00) | 0.98 (0.95-1.00) |
| <i>Sh</i> -SEA  | 0.97 (0.94-0.99)       | 1.00 (1.00-1.00) | 0.97 (0.95-1.00) |

**Table 5: Diagnostic accuracy of antigens using urine of individuals from *Schistosoma haematobium*-endemic populations determined by ELISA.**

| Antigen         | AUC in cohort (95% CI) |                  |                  |
|-----------------|------------------------|------------------|------------------|
|                 | Zimbabwe               | Zanzibar         | All              |
| MS3_10385       | 0.95 (0.90-0.99)       | 0.57 (0.46-0.69) | 0.78 (0.71-0.86) |
| MS3_10186       | 0.96 (0.92-1.00)       | 0.66 (0.55-0.77) | 0.69 (0.62-0.77) |
| MS3_09198       | 0.94 (0.90-0.98)       | 0.66 (0.51-0.81) | 0.78 (0.67-0.88) |
| MS3_01370       | 0.89 (0.82-0.96)       | 0.69 (0.56-0.82) | 0.81 (0.72-0.89) |
| <i>Sh</i> -TSP2 | 0.98 (0.96-1.00)       | 0.93 (0.87-0.99) | 0.96 (0.93-0.99) |
| <i>Sh</i> -SEA  | 0.77 (0.68-0.87)       | 0.82 (0.68-0.95) | 0.79 (0.69-0.90) |



## **Materials and Methods**

### **Ethical Statement**

Ethical approval for collection of samples from individuals from Zimbabwe was obtained by the Medical Research Council of Zimbabwe. Urine samples from this country were collected as part of a previous study investigating the diagnostic potential of host-exposed *S. haematobium* proteomes<sup>1</sup> (approval MRCZ/A/1710). Sample collection from individuals from Gabon was approved by the Comite de Ethique Regional Independent de Lambarene (protocol no. 06/08). The Zanzibar Medical Research Ethics Committee in Stonetown, Zanzibar (ZAMREC; reference no. ZAMREC 0003/Sept/011), the Ethikkommission beider Basel (EKBB) in Basel, Switzerland (reference no. 236/11) and the Institutional Review Board of the University of Georgia in Athens, GA, USA (project no. 2012-10138-0) approved the collection of samples from Zanzibar as part of a recently concluded five-year study on urogenital schistosomiasis elimination<sup>2</sup>. Collection of *Schistosoma japonicum*-infected samples was approved by the Institutional Review Board of the Research Institute for Tropical Medicine, Department of Health Manila, the Philippines (Institutional Review Board Numbers 2012-13-0 and 2015-12) and the Human Research Ethics Committee, QIMR Berghofer Medical Research Institute, Brisbane, Australia (Ethics Approval: Project P524). Collection of *Schistosoma mansoni*-infected samples was approved by the Institutional Review Board of the University of Gondar, Ethiopia.

### **Study design and cohorts**

On collection, all serum and urine samples were stratified based on egg burden as determined by microscopy analysis of urine samples (high,  $\geq 50$  eggs per 10 ml urine; or light, 1-49 eggs per 10 ml urine). Egg-negative samples were further tested for the presence of CAA using the up-converting phosphor lateral flow CAA assay<sup>3</sup> and were classified as being egg negative/CAA positive or egg negative/CAA negative. Serum and urine samples from individuals from non-endemic areas were used as non-endemic negative controls. Protein arrays were probed with serum and urine samples from individuals from the *S. haematobium*-endemic regions of Mashonaland East province, Zimbabwe and Lambarene, Gabon. Validation of array results was conducted by ELISA using the same cohorts of serum samples from Zimbabwe and Gabon and the same cohort of urine samples from Zimbabwe only (the Gabon urine cohort had been exhausted from array probing). Additional ELISA validation was performed using urine samples from individuals from Pemba and Unjuga islands, Zanzibar, sites of a recent five-year study into *S. haematobium* elimination. Immunochromatographic test evaluation was performed with serum samples from the Gabon cohort (the Zimbabwe cohort had been exhausted from ELISA validation) (table 1).

### ***S. haematobium* protein array feature selection and construction**

The primary criterion for the selection of proteins to be included on the *S. haematobium* protein array was the presence of the protein in surface and secreted proteomes of the parasite as these molecules are likely to be exposed to the host upon infection, and their cognate antibodies contained within the immune repertoire of infected individuals. Accordingly, proteins present in the adult *S. haematobium* tegument, soluble excretory/secretory products (ES) and EVs, ES from the egg stage,<sup>1,4</sup> and *S. haematobium* orthologues of proteins present in the *S. mansoni* schistosomula tegument proteome<sup>5</sup> (650 proteins in total) were selected for the array. The remaining ~350 proteins (for a ~1,000 feature array) consisted of *S. haematobium* orthologues of select proteins featured on the next generation *S. mansoni* proteome array<sup>6</sup>. Open reading frames (minus predicted signal peptides and flanked by 20 bp sequences corresponding to the recombination sites of the pXI array expression vector<sup>7</sup> to facilitate cloning by homologous recombination) for all selected proteins (table s1) were codon optimised for expression in *E. coli* and commercially synthesised and cloned in pUC57 by either Twist Bioscience (sequences < 1.8 kb) or ProteinCT (sequences > 1.8 kb). Synthesised genes were PCR amplified by primers corresponding to the pXI recombination sites and cloned into pXI, in-frame with the vector's 5' HA and 3' HIS tag-encoding sequences, using *in vivo* recombination<sup>8</sup>. Proteins encoded by each purified plasmid were expressed *in vitro* (RTS 100 *E. coli* HY kit – 5 Prime, MD, USA) according to the manufacturer's instructions and printed onto eight-pad nitrocellulose-coated AVID glass slides (Grace Biolabs, OR, USA) with an Omnigrad 100 microarray printer (Genomic Solutions, Ann Arbor, MI, USA). Vector containing no insert was similarly "expressed" and printed (in multiple locations) to act as a negative control and multiple empty spots were left on each pad to serve as background controls. Purified human IgG, anti-human IgG and parasite extracts (*S. haematobium* adult- and egg-stage ES products, soluble egg antigen and adult-stage tritonX-100-soluble extract) were also printed as positive controls. Expression quality control was assessed by detection of N-terminal HA and C-terminal HIS tags as previously described<sup>7</sup>.

### **Probing of *S. haematobium* protein arrays with human sera and urine**

Serum IgG responses to arrayed antigens were determined by probing with human serum (1:50 in array blocking buffer/10% *E. coli* lysate) as previously described<sup>7</sup> with the exception that an anti-human IgG-Qdot conjugate (1:100 in array blocking buffer) was used as the secondary/detection antibody and so tertiary incubation with a separate detection reagent was not needed. Urine IgG responses were determined by probing arrays in the same

way except that human urine samples were first concentrated 15-fold and buffer-exchanged into PBS before being diluted 1:5 in array blocking buffer/10% *E. coli* lysate and applied to the arrays.

### ***S. haematobium* protein array data analysis and bioinformatics**

Datasets generated from probing arrays with serum and urine were analysed separately. After subtracting slide backgrounds, the signal intensity (SI) of each spot was background corrected using the “group average” method, where the mean SI of the negative control (empty vector) spots were subtracted from the SI of each protein spot. Corrected SIs were then transformed using the variance stabilizing normalization (vsn) method<sup>7</sup> in GMiner (<http://cgenome.net/gmine>) using the VSN Bioconductor package.<sup>9</sup> Proteins were defined as IgG reactive if the mean of the transformed SI for all infected individuals was greater than the mean plus 1.5 standard deviations (SD) of the transformed SI of all non-endemic negative individuals. Significance differences between mean antibody responses in the infected versus non-infected groups were determined by Student’s t-test and p values adjusted for multiple statistical comparisons. Receiver-operating characteristic (ROC) curves and area under curve (AUC) values were generated for each significantly reactive antibody response using the ROCR R package and the proteins inducing those responses were ranked in order of significance.

### **Antibody signature identification**

A set of antigens capable of producing an antibody signature which could most effectively discriminate between infected and non-infected individuals, using either serum or urine as the diagnostic fluid, was identified. Firstly, for each dataset, all antigens inducing an antibody response that was significantly upregulated (after correction for multiple testing) between the infected and non-infected populations were selected (serum, n = 208; urine, n = 45). From these, antigens inducing antibody responses with a frequency of positivity (reactivity) in less than 30% of the infected population (serum, n = 178; urine, n = 7) and more than 30% of the non-infected population (serum, n = 9; urine, n = 13) were also excluded. Antigens in these trimmed datasets (serum, n = 21; urine, n = 25) were sorted by greatest to least fold change in mean SI between the infected and non-infected populations and frequency of reactivity in the infected population. The top antigens in each dataset were used to build a support vector machine classifier, the performance of which was evaluated by Monte Carlo cross-validation. Iteratively, 15 samples were randomly selected as the training set and the remaining samples were used as the test set. The model was then fit to the training data, and the predictive accuracy of the model in classifying samples as infected or

non-infected was assessed using the testing set. This process was repeated 4 times. The predictive performance of the model was then evaluated by averaging the ROC curves across all 4 Monte Carlo cross-validation runs.

### **Selection of EV-derived TSPs**

TSPs present in the *S. haematobium* EV proteome were sorted by abundance (peptide spectrum counting), and the most abundant TSPs with homologues of diagnostic efficacy reported in the literature (n=3) were selected for further assessment.

### **Recombinant protein production in *E. coli***

Eight antigens, selected from the immune signature and EV proteomic set (MS3\_10385, MS3\_10186, MS3\_06193, MS3\_01466, MS3\_05950, MS3\_09198, MS3\_01370 and *Sh*-TSP-2), were cloned into the *Nde*I and *Xho*I sites of the pET41a *E. coli* expression vector, such that the N-terminal GST tag was removed, to prevent the detection of non-specific immune responses upon ELISA validation of recombinant proteins. Pilot expression experiments showed *Sh*-TSP-2 to be expressed in soluble form and all other antigens to be expressed in insoluble form. Expression of MS3\_06193, MS3\_01466 and MS3\_05950 were at levels too low to warrant further development. Large-scale protein expression was induced for 24 h in *E. coli* BL21(DE3) by addition of 1 mM Isopropyl beta-D-1-thiogalactopyranoside (IPTG) using standard methods. Cultures were harvested by centrifugation (8,000 g for 20 min at 4°C), re-suspended in 50 ml lysis buffer (50 mM sodium phosphate, pH 8.0, 300 mM NaCl, 40 mM imidazole) and stored at -80°C. Cell pellets were lysed by three freeze-thaw cycles at -80°C and 42°C followed by sonication on ice (10 × 5 s pulses [70% amplitude] with 30 s rest periods between each pulse) with a Qsonica Sonicator. Insoluble material was pelleted by centrifugation at 20,000 g for 20 min at 4°C. The supernatant was discarded (except for the *Sh*-TSP-2 lysate, where the supernatant was kept and the insoluble material discarded) and inclusion bodies (IBs) were washed twice by resuspension in 30 ml of lysis buffer followed by centrifugation at 20,000 g for 20 min at 4°C. IBs were then solubilized sequentially by resuspension in 25 ml lysis buffers containing either 2 M, 4 M or 8 M urea, end-over-end mixing overnight at 4°C and centrifugation at 20,000 g for 20 min at 4°C. Finally, supernatants containing solubilized IBs were diluted 1:4 in lysis buffer containing 8M urea and filtered through a 0.22 µm membrane (Millipore). Solubilized IBs were purified by immobilized metal affinity chromatography (IMAC) by loading onto a prepacked 1 ml His-Trap HP column (GE Healthcare) equilibrated with lysis buffer containing 8M urea at a flow rate of 1 ml/min using an AKTA-pure-25 FPLC (GE Healthcare). After washing with 20 ml lysis buffer containing 8M urea, bound His-

tagged proteins were eluted using the same buffer with a stepwise gradient of 50-250 mM imidazole (50 mM steps). The supernatant containing *Sh*-TSP2 was similarly purified except that buffers did not contain urea. Fractions containing recombinant proteins (as determined by SDS-PAGE) were pooled and concentrated using Amicon Ultra-15 centrifugal devices with a 3 kDa MWCO and quantified using the Pierce BCA Protein Assay kit. The final concentration of each protein was adjusted to 1 mg/ml and proteins were aliquoted and stored at -80°C.

### **ELISA validation of serum and urine IgG responses**

The same serum samples used to probe the protein microarrays (Zimbabwe and Gabon cohorts) were used to measure IgG responses against each antigen by indirect ELISA. Microton high-binding 96-well microtiter ELISA plates (Greiner) were incubated overnight at 4°C with protein (either MS3\_10385, MS3\_10186, MS3\_09198, MS3\_01370 or *Sh*-TSP-2 - 2 µg/ml in 0.1 M Na<sub>2</sub>CO<sub>3</sub>/NaHCO<sub>3</sub>, pH 9.6) and, after washing with PBST, the plates were blocked for 2 hours at RT with 100 µl of PBST/5% BSA. Fifty microliters of sera (1:50 in PBST/1% BSA) were added to the wells and incubated overnight at 4°C, then the plates were washed with PBST and 100 µl of goat anti-human IgG-HRP (Sigma, 1:5000 in PBST) was added to the plates. Plates were incubated for 1 hour at RT, washed with PBST and developed with 3,3',5,5'-tetramethylbenzidine. Plates were read at a wavelength of 405 nm on a POLARstar Omega (BMG Labtech) microplate reader. Urine IgG responses to each antigen were measured in the same way (using the Zimbabwe cohort of samples used to probe the arrays as well as the Zanzibar cohort of samples) except that plates were blocked in PBST/5% skimmed milk powder and urine samples were diluted 1:10 in PBST. Urine IgG responses to multiple antigens were performed in the same way and plates were coated with 2 µg/ml of each antigen mixture. Assays were performed in triplicate and blank-corrected values were plotted using Graphpad Prism 7. Reactivity cutoffs were determined as the average plus 3SD of the values of the non-endemic negative group. ROC curves were also generated using Graphpad Prism 7 and significant differences between mean antibody responses of each infected group and the non-infected group was determined by Student's t-test, \*p≤0.05, \*\*p≤0.01, \*\*\*p≤0.001, \*\*\*\*p≤0.0001.

### **Analysis of species specificity**

Sera from Kato-Katz- and SEA-positive cohorts of individuals from areas endemic for *S. japonicum* (Northern Samar, The Philippines; n=21)<sup>10</sup> or *S. mansoni* (Gondar, Ethiopia; n=230)<sup>11</sup> only were tested by ELISA (as described previously in this study) to determine their reactivity with MS3\_01370 or *Sh*-TSP-2, the two top-

performing antigens by ELISA. For each antigen tested, the Gabon cohort of serum samples from *S. haematobium* infected individuals were used as positive controls.

### **Pilot development of PoC-ICTs**

For PoC test development, a lateral flow ICT was commercially designed (Serve Science, Bangkok, Thailand) (figure s1). The conjugate pad was coated with 10 OD of gold-conjugated mouse anti-human IgG (to capture any human IgG present in the applied serum). Either recombinant (1.0 mg/ml) MS3\_01370.1 or *Sh*-TSP2 (the two antigens with greatest diagnostic capacity as determined by ELISA) were sprayed at the test line (to capture any antigen-specific human IgG/anti-human IgG gold-conjugate complex) and 1.0 mg/ml anti-mouse IgG was sprayed at the control line (to capture anti-human IgG gold-conjugate and serve as an internal validation). To test samples with the ICT, 5 µl of serum (diluted 1:10 in buffer BS-007) was applied to the sample reservoir, 3 drops (approximately 100 µl) of buffer BS-007 was applied to the sample reservoir and the test was read after 15 mins. For each strip, a band at the test and control lines was considered a positive result, a band at the control line only was considered a negative result and a test was considered invalid if there was no band at the control line. Band intensity on positive tests were scored on a four-point scale from most (+4) to least (+1) intense. A score of 0 was given for a negative result. Test results were confirmed by two independent and blinded examiners.

## References

1. Sotillo J, Pearson MS, Becker L, et al. In-depth proteomic characterization of *Schistosoma haematobium*: Towards the development of new tools for elimination. *PLoS Negl Trop Dis* 2019; **13**(5): e0007362.
2. Knopp S, Person B, Ame SM, et al. Evaluation of integrated interventions layered on mass drug administration for urogenital schistosomiasis elimination: a cluster-randomised trial. *Lancet Glob Health* 2019; **7**(8): e1118-e29.
3. de Dood CJ, Hoekstra PT, Mngara J, et al. Refining diagnosis of *Schistosoma haematobium* infections: antigen and antibody detection in urine. *Front Immunol* 2018; **9**: 2635.
4. Mekonnen GG, Tedla BA, Pickering D, et al. *Schistosoma haematobium* extracellular vesicle proteins confer protection in a heterologous model of schistosomiasis. *Vaccines (Basel)* 2020; **8**(3).
5. Sotillo J, Pearson M, Becker L, Mulvenna J, Loukas A. A quantitative proteomic analysis of the tegumental proteins from *Schistosoma mansoni* schistosomula reveals novel potential therapeutic targets. *Int J Parasitol* 2015; **45**(8): 505-16.
6. de Assis RR, Ludolf F, Nakajima R, et al. A next-generation proteome array for *Schistosoma mansoni*. *Int J Parasitol* 2016; **46**(7): 411-5.
7. Gaze S, Driguez P, Pearson MS, et al. An immunomics approach to schistosome antigen discovery: antibody signatures of naturally resistant and chronically infected individuals from endemic areas. *PLoS Pathog* 2014; **10**(3): e1004033.
8. Davies DH, Liang X, Hernandez JE, et al. Profiling the humoral immune response to infection by using proteome microarrays: high-throughput vaccine and diagnostic antigen discovery. *Proc Natl Acad Sci U S A* 2005; **102**(3): 547-52.
9. Proietti C, Zakrzewski M, Watkins TS, et al. Mining, visualizing and comparing multidimensional biomolecular data using the Genomics Data Miner (GMine) Web-Server. *Sci Rep* 2016; **6**: 38178.
10. Cai P, Weerakoon KG, Mu Y, et al. A parallel comparison of antigen candidates for development of an optimized serological diagnosis of *Schistosomiasis japonica* in the Philippines. *EBioMedicine* 2017; **24**: 237-46.
11. Amare B, Moges B, Fantahun B, et al. Micronutrient levels and nutritional status of school children living in Northwest Ethiopia. *Nutr J* 2012; **11**: 108.

**Table S1: antigens used in construction of the *S. haematobium* protein microarray**

| Antigen (WBPS14*<br>Accession) | Description                                                                             | Predicted<br>SP?# | Selection method for array inclusion^ |
|--------------------------------|-----------------------------------------------------------------------------------------|-------------------|---------------------------------------|
| 2008-Sh-TSP2                   | Tetraspanin 2                                                                           | Yes               | proteomic (T, EV)                     |
| MS3_00004                      | Lysosomal alpha-glucosidase                                                             | Yes               | proteomic (AES, SEA, EV)              |
| MS3_00006                      | Pre-mRNA-splicing factor 38B                                                            | No                | bioinformatic                         |
| MS3_00047                      | 14-3-3 epsilon                                                                          | No                | proteomic (T, AES, EES, SEA, EV)      |
| MS3_00048                      | putative reticulon/nogo                                                                 | No                | proteomic (T, EV)                     |
| MS3_00054                      | TWiK family of potassium channels protein 18                                            | Yes               | bioinformatic                         |
| MS3_00066                      | putative sperm nuclear basic protein PL-I isoform PLIb                                  | No                | bioinformatic                         |
| MS3_00076                      | Deoxyhypusine hydroxylase                                                               | No                | bioinformatic                         |
| MS3_00143                      | Succinyl-CoA ligase [ADP/GDP-forming] subunit alpha, mitochondrial                      | No                | proteomic (T)                         |
| MS3_00147                      | eukaryotic translation initiation factor 5A                                             | No                | proteomic (T, AES, EV)                |
| MS3_00148                      | Peptidase S1 S6 chymotrypsin Hap active site                                            | Yes               | bioinformatic                         |
| MS3_00151                      | Prenylcysteine oxidase 1                                                                | No                | proteomic (T)                         |
| MS3_00178                      | Small nuclear ribonucleoprotein-associated protein B                                    | No                | bioinformatic                         |
| MS3_00180                      | putative programmed cell death protein                                                  | No                | proteomic (T, EV)                     |
| MS3_00183                      | Calcium-binding EF-hand, domain-containing protein                                      | No                | proteomic (EES, SEA)                  |
| MS3_00187                      | Guanine nucleotide-binding protein G(o) subunit alpha                                   | No                | proteomic (T, EV)                     |
| MS3_00196                      | Protein NDRG3                                                                           | No                | proteomic (T, EV)                     |
| MS3_00203                      | Pro-neuregulin-2, membrane-bound isoform                                                | Yes               | bioinformatic                         |
| MS3_00223                      | Oxalate:formate antiporter                                                              | No                | proteomic (EV)                        |
| MS3_00242                      | Signal recognition particle protein 19                                                  | No                | bioinformatic                         |
| MS3_00257                      | Regulator of microtubule dynamics protein 1                                             | No                | proteomic (T, AES)                    |
| MS3_00277                      | cAMP-dependent protein kinase type II regulatory subunit                                | No                | proteomic (T, AES, EES, SEA, EV)      |
| MS3_00286                      | aldo-keto reductase family 1, member B4 (aldose reductase)                              | No                | proteomic (T, AES, EES, SEA)          |
| MS3_00287                      | 40S ribosomal protein S6                                                                | Yes               | bioinformatic                         |
| MS3_00294                      | cytochrome b5 reductase 1                                                               | No                | proteomic (T)                         |
| MS3_00312                      | optic atrophy 1-like protein, opa1                                                      | No                | proteomic (T)                         |
| MS3_00316                      | Ubiquitin-conjugating enzyme E2 G1                                                      | No                | bioinformatic                         |
| MS3_00353                      | rab-related GTP-binding protein                                                         | No                | bioinformatic                         |
| MS3_00361                      | putative alpha-actinin                                                                  | No                | proteomic (T, AES, EV)                |
| MS3_00383                      | putative dihydrolipoamide succinyltransferase component of 2-oxoglutarate dehydrogenase | No                | bioinformatic                         |
| MS3_00403                      | tar DNA-binding protein, putative                                                       | No                | bioinformatic                         |
| MS3_00404                      | Density-regulated protein                                                               | No                | proteomic (EV)                        |
| MS3_00405                      | Iron-sulfur cluster assembly enzyme ISCU, mitochondrial                                 | No                | bioinformatic                         |
| MS3_00412                      | putative endophilin B1                                                                  | No                | proteomic (T, EV)                     |
| MS3_00413                      | 60S ribosomal protein L8                                                                | No                | bioinformatic                         |
| MS3_00440                      | pyruvate dehydrogenase (lipoamide)                                                      | No                | bioinformatic                         |
| MS3_00447                      | Homeobox protein abdominal-B                                                            | No                | bioinformatic                         |



|           |                                                                          |     |                                  |
|-----------|--------------------------------------------------------------------------|-----|----------------------------------|
| MS3_00449 | SJCHGC08006 protein                                                      | No  | bioinformatic                    |
| MS3_00450 | Mxi neural development protein                                           | No  | bioinformatic                    |
| MS3_00452 | Lysosomal Pro-X carboxypeptidase                                         | No  | proteomic (AES, EV)              |
| MS3_00494 | putative 40s ribosomal protein S18                                       | No  | bioinformatic                    |
| MS3_00498 | hypothetical protein                                                     | No  | bioinformatic                    |
| MS3_00499 | Tissue alpha-L-fucosidase                                                | No  | proteomic (AES, SEA)             |
| MS3_00504 | ER membrane protein complex subunit 7                                    | Yes | bioinformatic                    |
| MS3_00508 | Succinate dehydrogenase [ubiquinone] flavoprotein subunit, mitochondrial | No  | proteomic (T, SEA)               |
| MS3_00560 | AChain A, Uridine phosphorylase                                          | No  | proteomic (SEA, EV)              |
| MS3_00569 | G2/mitotic-specific cyclin-B2                                            | No  | bioinformatic                    |
| MS3_00604 | Ribosomal Protein, Small subunit                                         | No  | bioinformatic                    |
| MS3_00610 | Ester hydrolase C11orf54-like protein                                    | No  | proteomic (AES, EES, SEA)        |
| MS3_00625 | NADH dehydrogenase (ubiquinone) flavoprotein 1                           | No  | bioinformatic                    |
| MS3_00663 | Aspartate aminotransferase, cytoplasmic                                  | No  | proteomic (T, AES, SEA)          |
| MS3_00665 | putative camp-regulated phosphoprotein                                   | No  | bioinformatic                    |
| MS3_00668 | Replication protein A 70 kDa DNA-binding subunit                         | No  | bioinformatic                    |
| MS3_00670 | SJCHGC09518 protein                                                      | No  | bioinformatic                    |
| MS3_00676 | Persulfide dioxygenase ETHE1, mitochondrial                              | No  | proteomic (T, AES)               |
| MS3_00702 | ribosomal protein S16                                                    | No  | bioinformatic                    |
| MS3_00703 | Tricarboxylate transport protein                                         | No  | bioinformatic                    |
| MS3_00719 | putative palmitoyltransferase ZDHHC12                                    | No  | bioinformatic                    |
| MS3_00756 | Sodium/potassium-transporting ATPase subunit alpha                       | No  | proteomic (T, EV)                |
| MS3_00769 | Transmembrane protein 50A                                                | No  | bioinformatic                    |
| MS3_00779 | cellular nucleic acid-binding protein                                    | No  | bioinformatic                    |
| MS3_00785 | T-complex protein 1 subunit gamma                                        | No  | proteomic (T, AES, EES, SEA, EV) |
| MS3_00787 | Ectonucleoside triphosphate diphosphohydrolase 1                         | No  | proteomic (T, AES, EV)           |
| MS3_00800 | Serine/threonine-protein kinase haspin                                   | No  | bioinformatic                    |
| MS3_00805 | Alanine aminotransferase 2                                               | No  | proteomic (AES)                  |
| MS3_00808 | Polyadenylate-binding protein 2                                          | No  | bioinformatic                    |
| MS3_00812 | Splicing factor U2AF 35 kDa subunit                                      | No  | bioinformatic                    |
| MS3_00844 | putative cystinosin                                                      | Yes | bioinformatic                    |
| MS3_00850 | protein kinase                                                           | No  | bioinformatic                    |
| MS3_00859 | Fibrillin 2                                                              | No  | bioinformatic                    |
| MS3_00862 | thioredoxin peroxidase                                                   | No  | proteomic (AES, EES, SEA, EV)    |
| MS3_00876 | Neuronal calcium sensor 2                                                | No  | bioinformatic                    |
| MS3_00880 | Glioma pathogenesis-related protein 1 precursor                          | No  | proteomic (T, AES)               |
| MS3_00881 |                                                                          | Yes | proteomic (EES)                  |
| MS3_00886 | putative syntenin                                                        | No  | proteomic (T, EV)                |
| MS3_00891 | GLIPR1-like protein 1                                                    | No  | proteomic (T)                    |
| MS3_00900 | Guanylate kinase                                                         | No  | proteomic (EES)                  |

|           |                                                                                                              |     |                                  |
|-----------|--------------------------------------------------------------------------------------------------------------|-----|----------------------------------|
| MS3_00931 | putative nascent polypeptide associated complex alpha subunit (nac alpha)                                    | No  | proteomic (EV)                   |
| MS3_00934 | F-box only protein isoform 1                                                                                 | No  | bioinformatic                    |
| MS3_00939 | PI-PLC X domain-containing protein 1                                                                         | No  | bioinformatic                    |
| MS3_00996 | sh3 domain grb2-like protein B1 (endophilin B1)                                                              | No  | proteomic (T, AES, EV)           |
| MS3_01001 | vesicle-associated membrane protein 2                                                                        | No  | bioinformatic                    |
| MS3_01004 | COX assembly mitochondrial protein 1                                                                         | No  | bioinformatic                    |
| MS3_01014 | intraflagellar transport protein 20                                                                          | No  | bioinformatic                    |
| MS3_01016 | Alpha-tocopherol transfer protein-like                                                                       | No  | proteomic (EV)                   |
| MS3_01030 | Activin receptor type-2A                                                                                     | No  | bioinformatic                    |
| MS3_01049 | Alpha-tocopherol transfer protein-like                                                                       | No  | proteomic (EV)                   |
| MS3_01051 | Synaptophysin (Major synaptic vesicle protein p38)                                                           | No  | bioinformatic                    |
| MS3_01053 | tropomyosin, putative                                                                                        | No  | bioinformatic                    |
| MS3_01095 | putative smirv1 protein                                                                                      | Yes | proteomic (T, EV)                |
| MS3_01096 | Universal stress protein                                                                                     | No  | proteomic (T, SEA, EV)           |
| MS3_01104 | Heterogeneous nuclear ribonucleoprotein A1, A2/B1 homolog                                                    | No  | proteomic (EES)                  |
| MS3_01105 | Universal stress protein                                                                                     | No  | bioinformatic                    |
| MS3_01114 | hypothetical protein MS3_01114                                                                               | No  | bioinformatic                    |
| MS3_01124 | small subunit ribosomal protein S2e                                                                          | No  | bioinformatic                    |
| MS3_01141 | tRNA-splicing endonuclease subunit Sen2                                                                      | No  | proteomic (EV)                   |
| MS3_01153 | putative tetraspanin-CD63 receptor                                                                           | No  | proteomic (EV)                   |
| MS3_01160 | Stomatin-like protein 2, mitochondrial                                                                       | No  | proteomic (T)                    |
| MS3_01193 | putative pre-mRNA-processing ATP-dependent RNA helicase prp5                                                 | No  | bioinformatic                    |
| MS3_01218 | putative RNA-binding protein 18                                                                              | No  | bioinformatic                    |
| MS3_01240 | syntaxin, putative                                                                                           | No  | proteomic (EV)                   |
| MS3_01245 | activator protein 4 (ap4), putative                                                                          | No  | bioinformatic                    |
| MS3_01257 | BC026374 protein (S09 family)                                                                                | Yes | bioinformatic                    |
| MS3_01261 | Phosphoenolpyruvate carboxykinase [GTP]                                                                      | No  | proteomic (T, AES, EES, SEA, EV) |
| MS3_01262 | SJCHGC09353 protein                                                                                          | No  | bioinformatic                    |
| MS3_01274 | ribosomal protein L7a                                                                                        | No  | bioinformatic                    |
| MS3_01276 | putative phosphatidylcholine transfer protein                                                                | No  | bioinformatic                    |
| MS3_01286 | putative copii-coated vesicle membrane protein P24                                                           | Yes | bioinformatic                    |
| MS3_01289 | 1-pyrroline-5-carboxylate dehydrogenase                                                                      | No  | proteomic (T, EES)               |
| MS3_01302 | Deoxyhypusine synthase                                                                                       | No  | proteomic (AES)                  |
| MS3_01313 | SJCHGC04069 protein                                                                                          | No  | bioinformatic                    |
| MS3_01318 | putative merlin/moesin/ezrin/radixin                                                                         | No  | proteomic (AES, EV)              |
| MS3_01328 | DnaJ subfamily C member 28                                                                                   | No  | bioinformatic                    |
| MS3_01333 | RutC family protein                                                                                          | No  | bioinformatic                    |
| MS3_01337 | Universal stress protein                                                                                     | No  | proteomic (T)                    |
| MS3_01339 | putative ATP synthase, H <sup>+</sup> transporting, mitochondrial F0 complex, subunit c isoform 2a precursor | No  | bioinformatic                    |
| MS3_01348 | High mobility group protein DSP1                                                                             | No  | bioinformatic                    |

|           |                                                               |     |                             |
|-----------|---------------------------------------------------------------|-----|-----------------------------|
| MS3_01353 | basigin related                                               | No  | bioinformatic               |
| MS3_01364 | Tropomyosin isoform 2                                         | No  | proteomic (AES, EES, SEA)   |
| MS3_01365 | putative Bax inhibitor-1                                      | No  | bioinformatic               |
| MS3_01370 | CD63 antigen                                                  | No  | proteomic (T, EV)           |
| MS3_01386 | Protein diaphanous 2                                          | No  | proteomic (T)               |
| MS3_01406 | putative mitochondrial import receptor subunit tom22          | No  | proteomic (T)               |
| MS3_01422 | rna-binding ras-gap sh3 binding protein related               | No  | bioinformatic               |
| MS3_01425 | PC3-like endoprotease variant A                               | No  | proteomic (T, AES)          |
| MS3_01435 | Ribosomal protein L11                                         | No  | bioinformatic               |
| MS3_01445 | putative transformer-2 protein                                | No  | bioinformatic               |
| MS3_01466 | Band 7 protein                                                | No  | bioinformatic               |
| MS3_01478 | polymorphic mucin variant                                     | No  | proteomic (EES)             |
| MS3_01483 | proteasome (prosome macropain) subunit alpha type 4           | No  | proteomic (SEA, EV)         |
| MS3_01504 | SJCHGC00710 protein                                           | No  | proteomic (T, EV)           |
| MS3_01516 | gynecophoral canal protein                                    | No  | proteomic (AES)             |
| MS3_01527 | High mobility group protein DSP1                              | No  | proteomic (EES)             |
| MS3_01542 | acetyl-CoA C-acetyltransferase                                | No  | proteomic (AES)             |
| MS3_01558 | Protein YIPF6                                                 | No  | bioinformatic               |
| MS3_01585 | PDZ and LIM domain protein Zasp                               | No  | bioinformatic               |
| MS3_01597 | Deoxyribodipyrimidine photo-lyase                             | No  | bioinformatic               |
| MS3_01600 | Histone H2A                                                   | No  | bioinformatic               |
| MS3_01611 | putative malate dehydrogenase                                 | No  | bioinformatic               |
| MS3_01627 | T-complex protein 1 subunit eta                               | No  | proteomic (EES, EV)         |
| MS3_01636 | putative lysosome-associated membrane glycoprotein            | No  | proteomic (EV)              |
| MS3_01643 | putative lysosome-associated membrane glycoprotein            | No  | bioinformatic               |
| MS3_01650 | Adenylate kinase                                              | No  | proteomic (T, AES, EES, EV) |
| MS3_01653 | Ras-related protein Rap-1b                                    | No  | proteomic (T, EV)           |
| MS3_01658 | Phospholipase D3                                              | No  | proteomic (ES, EV)          |
| MS3_01664 | Glycosyltransferase 1 domain-containing protein isoform 4     | No  | bioinformatic               |
| MS3_01668 | putative zinc finger protein                                  | No  | bioinformatic               |
| MS3_01686 | Minor histocompatibility antigen H13                          | No  | bioinformatic               |
| MS3_01693 | Proteinase inhibitor I25, cystatin, domain-containing protein | Yes | bioinformatic               |
| MS3_01705 | cathepsin F (C01 family)                                      | No  | bioinformatic               |
| MS3_01710 | Small nuclear ribonucleoprotein Sm D3                         | No  | bioinformatic               |
| MS3_01749 | Putative aminopeptidase W07G4.4                               | No  | proteomic (T, SEA, EV)      |
| MS3_01761 | putative histone H2A.1                                        | No  | bioinformatic               |
| MS3_01764 | putative tropomyosin                                          | No  | proteomic (AES, EES, SEA)   |
| MS3_01771 | signalase (S26 family)                                        | No  | bioinformatic               |
| MS3_01775 | putative DNA-binding protein                                  | No  | bioinformatic               |
| MS3_01777 | putative elongation factor 1-gamma                            | No  | proteomic (SEA)             |

|           |                                                                                                                  |     |                                  |
|-----------|------------------------------------------------------------------------------------------------------------------|-----|----------------------------------|
| MS3_01780 | Eukaryotic initiation factor 4A                                                                                  | No  | bioinformatic                    |
| MS3_01833 | putative cytoskeletal protein tektin                                                                             | No  | proteomic (EES)                  |
| MS3_01840 | Hypothetical Schistosoma spp. protein UPF0506                                                                    | No  | proteomic (T, EV)                |
| MS3_01852 | Zinc finger protein ZPR1                                                                                         | Yes | proteomic (T)                    |
| MS3_01857 | Paramyosin isoform 1                                                                                             | No  | proteomic (EES)                  |
| MS3_01870 | CCR4-NOT transcription complex subunit 7                                                                         | No  | bioinformatic                    |
| MS3_01871 | 14-3-3 epsilon 2                                                                                                 | No  | proteomic (T, EV)                |
| MS3_01898 | CD36-like class B scavenger receptor                                                                             | No  | proteomic (EV)                   |
| MS3_01899 | Prolyl endopeptidase                                                                                             | No  | proteomic (AES)                  |
| MS3_01902 | putative 40s ribosomal protein S4                                                                                | No  | bioinformatic                    |
| MS3_01905 | putative tetraspanin                                                                                             | No  | proteomic (EV)                   |
| MS3_01922 | putative actin                                                                                                   | No  | proteomic (T, AES, EES, SEA, EV) |
| MS3_01934 | putative carbonic anhydrase                                                                                      | No  | proteomic (T, EV)                |
| MS3_01937 | Hypothetical Schistosoma spp. protein UPF0506                                                                    | No  | bioinformatic                    |
| MS3_01938 | Proliferating cell nuclear antigen                                                                               | No  | bioinformatic                    |
| MS3_01952 | Annexin A13 (Annexin XIII)                                                                                       | No  | proteomic (T, AES, EV)           |
| MS3_01964 | putative annexin                                                                                                 | No  | proteomic (T, AES, EV)           |
| MS3_01972 | Leptin receptor overlapping transcript-like 1                                                                    | No  | bioinformatic                    |
| MS3_01983 | putative ATPase inhibitor isoform 2                                                                              | No  | proteomic (T)                    |
| MS3_01988 | Voltage-dependent anion-selective channel protein 2                                                              | No  | proteomic (T)                    |
| MS3_02001 | putative tumor protein d52                                                                                       | No  | proteomic (EES)                  |
| MS3_02027 | 20S proteasome subunit alpha 7                                                                                   | No  | proteomic (AES, EES)             |
| MS3_02041 | Protein BUD31 homolog                                                                                            | No  | bioinformatic                    |
| MS3_02044 | Casein kinase I isoform gamma-1                                                                                  | No  | proteomic (EV)                   |
| MS3_02048 | Receptor expression-enhancing protein 5                                                                          | No  | proteomic (T)                    |
| MS3_02050 | Ras-related protein RABA2a                                                                                       | No  | proteomic (EV)                   |
| MS3_02085 | Mitochondrial import receptor subunit TOM70                                                                      | No  | proteomic (T)                    |
| MS3_02086 | Cytochrome c                                                                                                     | No  | proteomic (T, AES, EES, SEA)     |
| MS3_02087 | Acidic leucine-rich nuclear phosphoprotein 32-related protein (ANP32/acidic nuclear phosphoprotein-like protein) | No  | proteomic (EV)                   |
| MS3_02088 | Netrin receptor DCC                                                                                              | No  | bioinformatic                    |
| MS3_02136 | malate dehydrogenase                                                                                             | No  | proteomic (T)                    |
| MS3_02141 | putative 60s ribosomal protein L13a                                                                              | No  | bioinformatic                    |
| MS3_02155 | Proteasomal ubiquitin receptor ADRM1                                                                             | No  | bioinformatic                    |
| MS3_02157 | Protein max                                                                                                      | No  | bioinformatic                    |
| MS3_02160 | Tubulin beta-2C chain                                                                                            | No  | bioinformatic                    |
| MS3_02162 | putative placenta-specific protein 8 protein (C15 protein) (Onzin)                                               | No  | proteomic (T, AES, EV)           |
| MS3_02172 | Tumor suppressor candidate 3 (Protein N33)                                                                       | Yes | bioinformatic                    |
| MS3_02176 | Microsomal glutathione S-transferase 3                                                                           | No  | proteomic (T)                    |
| MS3_02202 | ribosomal protein S10                                                                                            | No  | bioinformatic                    |
| MS3_02234 | putative tftid subunit                                                                                           | No  | bioinformatic                    |

|           |                                                                    |     |                                  |
|-----------|--------------------------------------------------------------------|-----|----------------------------------|
| MS3_02237 | ring finger protein 168                                            | No  | bioinformatic                    |
| MS3_02256 | SJCHGC08335 protein                                                | No  | proteomic (AES)                  |
| MS3_02275 | Putative BTB/POZ domain-containing protein                         | No  | proteomic (EES)                  |
| MS3_02289 | Corepressor interacting with RBPJ 1                                | No  | bioinformatic                    |
| MS3_02307 | putative isocitric dehydrogenase subunit alpha                     | No  | proteomic (T, EES)               |
| MS3_02314 | tubulin alpha-1A chain                                             | No  | proteomic (T, AES, EES, SEA, EV) |
| MS3_02318 | gamma-glutamyltransferase-like protein 3 (T03 family)              | No  | proteomic (T, EV)                |
| MS3_02343 | V-type proton ATPase subunit B                                     | No  | proteomic (EV)                   |
| MS3_02346 | Serine/threonine-protein phosphatase PP1-beta catalytic subunit    | No  | proteomic (AES, EV)              |
| MS3_02356 | DM9 domain-containing protein                                      | No  | proteomic (EV)                   |
| MS3_02359 | DM9 domain-containing protein                                      | No  | proteomic (T, AES, EV)           |
| MS3_02368 | SAR1 gene homolog B                                                | No  | proteomic (T)                    |
| MS3_02375 | Ras-related protein Rab-30                                         | No  | proteomic (T, EV)                |
| MS3_02393 | SUZ domain-containing protein 1                                    | No  | bioinformatic                    |
| MS3_02396 | Pleckstrin homology domain-containing family B member 2            | No  | bioinformatic                    |
| MS3_02407 | SJCHGC06436 protein                                                | No  | proteomic (EES)                  |
| MS3_02425 | Enolase                                                            | No  | proteomic (T, AES, EES, SEA, EV) |
| MS3_02428 | Cytochrome b-c1 complex subunit 7                                  | No  | proteomic (T)                    |
| MS3_02442 | putative polyadenylate binding protein                             | No  | bioinformatic                    |
| MS3_02453 | Microtubule-associated protein RP/EB family member 1               | No  | bioinformatic                    |
| MS3_02460 | Sorting nexin-3                                                    | No  | bioinformatic                    |
| MS3_02465 | actin beta/gamma 1                                                 | No  | proteomic (T, AES, EV)           |
| MS3_02474 | hypothetical protein MS3_02474                                     | No  | bioinformatic                    |
| MS3_02476 | SJCHGC00797 protein                                                | No  | proteomic (T, AES, EV)           |
| MS3_02486 | SJCHGC02563 protein                                                | No  | proteomic (T, AES, EV)           |
| MS3_02489 | SJCHGC06012 protein                                                | No  | bioinformatic                    |
| MS3_02494 | SJCHGC01166 protein                                                | No  | proteomic (T, AES, EV)           |
| MS3_02499 | putative serpin                                                    | No  | proteomic (AES)                  |
| MS3_02504 | ATPase, H <sup>+</sup> transporting, lysosomal accessory protein 1 | No  | proteomic (T, EV)                |
| MS3_02538 | Alanine aminotransferase 2                                         | No  | bioinformatic                    |
| MS3_02539 | prominin (prom) protein, putative                                  | No  | proteomic (T, EV)                |
| MS3_02545 | putative glucose transport protein                                 | No  | proteomic (T, AES, EV)           |
| MS3_02553 | saposin containing protein                                         | No  | proteomic (T, EV)                |
| MS3_02593 | putative cytosolic purine 5-nucleotidase                           | No  | proteomic (EV)                   |
| MS3_02637 | SJCHGC06845 protein                                                | Yes | bioinformatic                    |
| MS3_02641 | ribosomal protein S8                                               | No  | bioinformatic                    |
| MS3_02653 | 60S ribosomal protein L26                                          | No  | bioinformatic                    |
| MS3_02674 | SJCHGC09134 protein                                                | Yes | proteomic (AES, EV)              |
| MS3_02681 | Transmembrane protein 256-like protein                             | No  | bioinformatic                    |
| MS3_02685 | putative prohibitin                                                | No  | proteomic (T, EES)               |

|           |                                                                              |     |                                  |
|-----------|------------------------------------------------------------------------------|-----|----------------------------------|
| MS3_02688 | 97 kDa heat shock protein                                                    | No  | proteomic (T, EES, SEA, EV)      |
| MS3_02690 | synaptotagmin, putative                                                      | No  | proteomic (T)                    |
| MS3_02709 | Tropinone reductase 2                                                        | No  | bioinformatic                    |
| MS3_02734 | O-acetyl-ADP-ribose deacetylase MACROD2                                      | No  | proteomic (T, AES)               |
| MS3_02747 | putative fatty acid binding protein                                          | No  | proteomic (EES)                  |
| MS3_02752 | dihydroliipoamide dehydrogenase                                              | No  | proteomic (AES, EES, SEA)        |
| MS3_02758 | Solute carrier family 2, facilitated glucose transporter member 2            | No  | bioinformatic                    |
| MS3_02787 | Mitochondrial import receptor subunit TOM34                                  | No  | proteomic (EV)                   |
| MS3_02802 | ceramide kinase                                                              | No  | bioinformatic                    |
| MS3_02804 | small subunit ribosomal protein S30e                                         | No  | bioinformatic                    |
| MS3_02805 | Sapoin-like,IPR008139 Sapoin B,domain-containing protein                     | No  | proteomic (AES, EV)              |
| MS3_02807 | proteasome subunit alpha 6 (T01 family)                                      | No  | proteomic (EES, SEA, EV)         |
| MS3_02838 | AN1-type zinc finger protein 6 (Zinc finger A20 domain-containing protein 3) | No  | proteomic (T, AES, EES, SEA, EV) |
| MS3_02855 | putative selenoprotein T                                                     | No  | bioinformatic                    |
| MS3_02856 | Fructose-bisphosphate aldolase isoform 3                                     | No  | proteomic (T, AES, EES, SEA, EV) |
| MS3_02899 | SLIT and NTRK-like protein 2                                                 | No  | proteomic (AES)                  |
| MS3_02928 | putative serine/threonine-protein phosphatase PP2A regulatory subunit        | No  | proteomic (T, AES)               |
| MS3_02944 | Extracellular superoxide dismutase [Cu-Zn] precursor                         | Yes | bioinformatic                    |
| MS3_02951 | Putative adenosylhomocysteinase 3                                            | No  | bioinformatic                    |
| MS3_02952 | DnaJ subfamily B member 9 isoform 2                                          | Yes | bioinformatic                    |
| MS3_02954 | putative dtdp-glucose 4-6-dehydratase                                        | No  | bioinformatic                    |
| MS3_02991 | V-type H <sup>+</sup> -transporting ATPase subunit E                         | No  | proteomic (EV)                   |
| MS3_02999 | Galectin-3-binding protein A                                                 | No  | proteomic (EES)                  |
| MS3_03041 | ubiquinol-cytochrome c reductase, Rieske iron-sulfur polypeptide 1           | No  | bioinformatic                    |
| MS3_03047 | Tektin-4                                                                     | No  | proteomic (EES)                  |
| MS3_03054 | chaperonin containing TCPI, subunit 5 (epsilon)                              | No  | proteomic (SEA)                  |
| MS3_03079 | nalp (nacht, leucine rich repeat and pyrin domain containing)-related        | No  | proteomic (EV)                   |
| MS3_03084 | putative beta thymosin                                                       | No  | proteomic (T, AES)               |
| MS3_03091 | putative pdz and lim domain protein                                          | No  | bioinformatic                    |
| MS3_03096 | glucose-6-phosphate isomerase                                                | No  | proteomic (T, AES, EES, SEA, EV) |
| MS3_03101 | Peptidyl-glycine alpha-amidating monooxygenase                               | No  | bioinformatic                    |
| MS3_03119 | Dolichyl-diphosphooligosaccharide--protein glycosyltransferase subunit DAD1  | No  | bioinformatic                    |
| MS3_03127 | Putative actin-interacting protein 1                                         | No  | proteomic (AES, SEA, EV)         |
| MS3_03130 | putative tRNA(His) guanylyltransferase                                       | Yes | bioinformatic                    |
| MS3_03140 | 40S ribosomal protein S3A, putative                                          | No  | bioinformatic                    |
| MS3_03171 | Ribosomal protein S15Aa                                                      | No  | proteomic (EES, SEA)             |
| MS3_03192 | 25 kDa integral membrane protein                                             | No  | bioinformatic                    |
| MS3_03193 | tetraspanin TE736                                                            | No  | bioinformatic                    |
| MS3_03206 | ATP:ADP antiporter                                                           | No  | proteomic (T, EES)               |
| MS3_03226 | Leucine-rich repeat-containing protein 57                                    | No  | proteomic (T)                    |

|           |                                                                   |     |                         |
|-----------|-------------------------------------------------------------------|-----|-------------------------|
| MS3_03231 | H/ACA ribonucleoprotein complex subunit 2                         | No  | bioinformatic           |
| MS3_03269 | SJCHGC05509 protein                                               | No  | bioinformatic           |
| MS3_03270 | putative phosphatidylinositol-4-phosphate 5-kinase, type I, alpha | No  | bioinformatic           |
| MS3_03295 | putative atp synthase beta subunit                                | No  | proteomic (T, EES)      |
| MS3_03301 | putative atp synthase beta subunit                                | No  | proteomic (T, EES, SEA) |
| MS3_03304 | Translocon-associated protein subunit delta                       | No  | proteomic (T, EV)       |
| MS3_03350 | DEP domain-containing protein 5                                   | No  | bioinformatic           |
| MS3_03372 | syntaxin-binding protein 1                                        | No  | proteomic (EV)          |
| MS3_03381 | Tubulin beta chain                                                | No  | proteomic (T, AES)      |
| MS3_03385 | putative rna binding motif protein 4,lark                         | No  | proteomic (AES)         |
| MS3_03400 | Stress protein DDR48 (DNA damage-responsive protein 48)           | Yes | bioinformatic           |
| MS3_03405 | eggshell precursor protein                                        | No  | bioinformatic           |
| MS3_03406 | Pro-His-rich protein                                              | No  | bioinformatic           |
| MS3_03417 | Major egg antigen                                                 | No  | proteomic (T, EV)       |
| MS3_03419 | integral membrane G protein-coupled receptor isoform 2            | No  | bioinformatic           |
| MS3_03420 | Major egg antigen                                                 | No  | proteomic (AES)         |
| MS3_03424 | putative elongation factor ts                                     | No  | bioinformatic           |
| MS3_03427 | Major egg antigen                                                 | No  | proteomic (AES)         |
| MS3_03429 | putative protease                                                 | Yes | bioinformatic           |
| MS3_03443 | ADP-ribosylation factor 4-like                                    | No  | proteomic (T)           |
| MS3_03453 | Katanin p60 ATPase-containing subunit A-like 2                    | No  | proteomic (EV)          |
| MS3_03461 | low-density lipoprotein receptor (ldl)                            | Yes | bioinformatic           |
| MS3_03509 | Protein jagged-1b                                                 | Yes | bioinformatic           |
| MS3_03511 | putative sj-Ts4 protein                                           | No  | bioinformatic           |
| MS3_03513 | glutathione peroxidase, putative                                  | No  | proteomic (SEA)         |
| MS3_03534 | UTP--glucose-1-phosphate uridylyltransferase                      | No  | proteomic (SEA)         |
| MS3_03558 | chloride intracellular channel 4                                  | Yes | proteomic (AES, EV)     |
| MS3_03569 | Protein transport protein Sec61 subunit alpha-like 1              | No  | bioinformatic           |
| MS3_03571 | putative cationic amino acid transporter                          | No  | bioinformatic           |
| MS3_03576 | Y+L amino acid transporter 2                                      | No  | bioinformatic           |
| MS3_03577 | ribosomal protein S14                                             | No  | bioinformatic           |
| MS3_03599 | ribosomal protein L27                                             | No  | bioinformatic           |
| MS3_03603 | SJCHGC06759 protein                                               | Yes | bioinformatic           |
| MS3_03615 | putative elongation factor tu (ef-tu)                             | No  | proteomic (T)           |
| MS3_03618 | Mitochondrial inner membrane protein OXA1L                        | No  | bioinformatic           |
| MS3_03625 | Ubiquitin-conjugating enzyme E2 G2                                | No  | bioinformatic           |
| MS3_03641 | ribosomal protein S8                                              | No  | bioinformatic           |
| MS3_03655 | nervana 2                                                         | No  | proteomic (T, EV)       |
| MS3_03662 | sugar nucleotide epimerase related                                | No  | bioinformatic           |
| MS3_03695 | Rab effector MyRIP                                                | No  | proteomic (T)           |

|           |                                                                                              |     |                                  |
|-----------|----------------------------------------------------------------------------------------------|-----|----------------------------------|
| MS3_03726 | Stromal membrane-associated protein 1                                                        | No  | proteomic (EV)                   |
| MS3_03768 | putative tensin                                                                              | No  | proteomic (T)                    |
| MS3_03775 | Transketolase                                                                                | No  | proteomic (T, AES, EES, SEA, EV) |
| MS3_03776 | Mitochondrial deoxynucleotide carrier                                                        | No  | bioinformatic                    |
| MS3_03789 | family T2 unassigned peptidase (T02 family)                                                  | Yes | bioinformatic                    |
| MS3_03800 | hypothetical protein                                                                         | No  | proteomic (T)                    |
| MS3_03802 | Transitional endoplasmic reticulum ATPase                                                    | No  | proteomic (T, AES, EES, SEA, EV) |
| MS3_03814 | EF-hand domain-containing protein 1                                                          | No  | proteomic (EES, SEA)             |
| MS3_03817 | putative cationic amino acid transporter                                                     | No  | bioinformatic                    |
| MS3_03818 | MIT domain-containing protein isoform 3                                                      | No  | proteomic (T)                    |
| MS3_03824 | ribosomal protein L10a                                                                       | No  | bioinformatic                    |
| MS3_03853 | osteopetrosis associated transmembrane                                                       | No  | bioinformatic                    |
| MS3_03856 | SJCHGC05495 protein                                                                          | No  | bioinformatic                    |
| MS3_03863 | Golgi to ER traffic protein 4-like protein                                                   | No  | bioinformatic                    |
| MS3_03872 | Putative complexin-1                                                                         | No  | proteomic (EES)                  |
| MS3_03918 | Transmembrane 9 superfamily protein member 4                                                 | No  | bioinformatic                    |
| MS3_03933 | Severin                                                                                      | No  | proteomic (T, AES, EV)           |
| MS3_03937 | putative gelsolin                                                                            | No  | proteomic (T, AES, EES, SEA, EV) |
| MS3_03938 | ras-like protein 3                                                                           | No  | proteomic (T, EV)                |
| MS3_03963 | dynein light chain type 1                                                                    | No  | bioinformatic                    |
| MS3_03973 | putative sm29                                                                                | No  | proteomic (T, AES, EV)           |
| MS3_03976 | 14-3-3 protein, putative                                                                     | No  | proteomic (T, AES, EV)           |
| MS3_03977 | 14-3-3 protein, putative                                                                     | No  | proteomic (T, AES, EES, SEA, EV) |
| MS3_03979 | putative vesicle-associated membrane protein (vamp)                                          | No  | proteomic (AES)                  |
| MS3_03988 | receptor for activated PKC, putative                                                         | No  | bioinformatic                    |
| MS3_03992 | putative growth hormone inducible transmembrane protein                                      | No  | bioinformatic                    |
| MS3_04011 | Co-chaperone protein isoform 1                                                               | No  | proteomic (EV)                   |
| MS3_04025 | Vacuolar H ATPase                                                                            | No  | bioinformatic                    |
| MS3_04053 | Neuronal acetylcholine receptor subunit alpha-2                                              | Yes | proteomic (EV)                   |
| MS3_04063 | adenylosuccinate lyase                                                                       | No  | proteomic (SEA)                  |
| MS3_04083 | putative glypican                                                                            | No  | bioinformatic                    |
| MS3_04100 | Palmitoyl-protein thioesterase 1                                                             | No  | proteomic (AES)                  |
| MS3_04117 | SJCHGC02809 protein                                                                          | No  | bioinformatic                    |
| MS3_04147 | hypothetical protein MS3_04147                                                               | Yes | bioinformatic                    |
| MS3_04157 | hypothetical protein MS3_04157                                                               | Yes | bioinformatic                    |
| MS3_04158 | Clumping factor A precursor (Fibrinogen-binding protein A) (Fibrinogen receptor A), putative | No  | proteomic (T, AES)               |
| MS3_04178 | ubiquinol-cytochrome c reductase cytochrome c1 subunit                                       | No  | proteomic (T)                    |
| MS3_04179 | THO complex subunit 4                                                                        | No  | bioinformatic                    |
| MS3_04193 | Phosphopantetheine-binding domain-containing protein                                         | No  | proteomic (T)                    |
| MS3_04206 | ATP synthase subunit O, mitochondrial                                                        | No  | proteomic (T)                    |



|           |                                                                                       |     |                                  |
|-----------|---------------------------------------------------------------------------------------|-----|----------------------------------|
| MS3_04221 | 26S proteasome non-ATPase regulatory subunit 10                                       | No  | bioinformatic                    |
| MS3_04225 | Aspartate aminotransferase, mitochondrial                                             | No  | proteomic (T, EES, SEA)          |
| MS3_04227 | Egg protein CP3842                                                                    | Yes | bioinformatic                    |
| MS3_04261 | Ribosomal Protein, Small subunit                                                      | No  | bioinformatic                    |
| MS3_04262 | Histone H1B                                                                           | Yes | bioinformatic                    |
| MS3_04266 | SJCHGC06358 protein                                                                   | No  | proteomic (EV)                   |
| MS3_04267 | Globin-3                                                                              | No  | proteomic (EES, SEA)             |
| MS3_04268 | hypothetical protein MS3_04268                                                        | No  | proteomic (EV)                   |
| MS3_04269 | Cercarial stage-specific protein isoform 2                                            | No  | bioinformatic                    |
| MS3_04275 | putative tegumental protein                                                           | No  | proteomic (T, EV)                |
| MS3_04276 | SJCHGC06242 protein                                                                   | No  | proteomic (T, AES, EV)           |
| MS3_04279 | Sapospin B domain-containing protein                                                  | No  | proteomic (AES)                  |
| MS3_04285 | Peptidyl-prolyl cis-trans isomerase                                                   | No  | proteomic (T, AES, EES, SEA, EV) |
| MS3_04286 | Hematopoietic lineage cell-specific protein isoform 1                                 | No  | bioinformatic                    |
| MS3_04307 | fatty acid binding protein                                                            | No  | proteomic (T, AES, EES, SEA, EV) |
| MS3_04311 | putative annexin                                                                      | No  | proteomic (AES, SEA)             |
| MS3_04342 | citrate synthase                                                                      | No  | proteomic (T, AES, EES, SEA)     |
| MS3_04347 | ER degradation-enhancing alpha-mannosidase-like protein 2                             | No  | proteomic (EV)                   |
| MS3_04355 | Ras-related protein Ral-A                                                             | No  | proteomic (T, EV)                |
| MS3_04364 | putative small nuclear ribonucleoprotein Sm D2                                        | No  | bioinformatic                    |
| MS3_04375 | Zinc finger, C2H2-type domain-containing protein                                      | No  | bioinformatic                    |
| MS3_04386 | Isochorismatase domain-containing protein 2, mitochondrial                            | No  | proteomic (T)                    |
| MS3_04437 | putative DNA double-strand break repair rad50 ATPase                                  | Yes | proteomic (AES)                  |
| MS3_04449 | Adenosylhomocysteinase A                                                              | No  | proteomic (AES, EES, SEA, EV)    |
| MS3_04453 | Basic-leucine zipper (BZIP) transcription factor, domain-containing protein isoform 1 | No  | bioinformatic                    |
| MS3_04474 | hypothetical protein MS3_0018310                                                      | No  | proteomic (T, AES, EV)           |
| MS3_04493 | putative mitochondrial import receptor subunit TOM40 homolog                          | No  | proteomic (T)                    |
| MS3_04499 | NADH dehydrogenase (ubiquinone) Fe-S protein 8                                        | No  | bioinformatic                    |
| MS3_04526 | subfamily T1A non-peptidase homologue (T01 family)                                    | No  | proteomic (AES, EES, SEA, EV)    |
| MS3_04540 | RuvB-like protein 2                                                                   | No  | bioinformatic                    |
| MS3_04550 | glyoxalase I                                                                          | No  | proteomic (T, AES, SEA)          |
| MS3_04559 | Eukaryotic translation initiation factor 5                                            | No  | bioinformatic                    |
| MS3_04564 | Growth hormone-regulated TBC protein 1-A                                              | No  | proteomic (EV)                   |
| MS3_04582 | 6-phosphofructokinase                                                                 | No  | proteomic (T)                    |
| MS3_04584 | 6-phosphofructokinase                                                                 | No  | proteomic (T, AES, EV)           |
| MS3_04595 | Programmed cell death 6-interacting protein                                           | No  | proteomic (T, AES, SEA, EV)      |
| MS3_04598 | putative annexin                                                                      | No  | proteomic (EV)                   |
| MS3_04609 | putative 26S proteasome non-ATPase regulatory subunit 11                              | No  | bioinformatic                    |
| MS3_04617 | Lysosomal protective protein                                                          | Yes | proteomic (AES, EV)              |
| MS3_04642 | Glutathione S-transferase omega-1 isoform 1                                           | No  | proteomic (EES)                  |

|           |                                                              |     |                                  |
|-----------|--------------------------------------------------------------|-----|----------------------------------|
| MS3_04646 | Omega-amidase NIT2                                           | No  | proteomic (AES, SEA)             |
| MS3_04680 | Ras-related protein Rab-14                                   | No  | proteomic (T)                    |
| MS3_04688 | Zinc finger CDGSH domain-containing protein 1                | No  | proteomic (T)                    |
| MS3_04717 | ribosomal protein related                                    | Yes | proteomic (SEA)                  |
| MS3_04767 | putative vesicular amine transporter                         | No  | bioinformatic                    |
| MS3_04774 | Cathepsin L-like proteinase precursor                        | No  | proteomic (EV)                   |
| MS3_04778 | Phosphoglycerate kinase                                      | No  | proteomic (T, AES, EES, SEA, EV) |
| MS3_04781 | Ribosomal protein L9                                         | No  | bioinformatic                    |
| MS3_04799 | Armadillo repeat-containing protein 1                        | No  | bioinformatic                    |
| MS3_04800 | hypothetical protein MS3_04800, partial                      | Yes | bioinformatic                    |
| MS3_04817 | SJCHGC02432 protein                                          | No  | bioinformatic                    |
| MS3_04820 | putative zinc transporter                                    | Yes | bioinformatic                    |
| MS3_04827 | Ubiquinone biosynthesis protein COQ7-like protein            | No  | bioinformatic                    |
| MS3_04873 | putative prefoldin subunit 2                                 | No  | bioinformatic                    |
| MS3_04887 | putative UDP-galactose-4-epimerase                           | No  | proteomic (T, SEA, EV)           |
| MS3_04896 | S-phase kinase-associated protein 1                          | No  | bioinformatic                    |
| MS3_04920 | Mastin precursor                                             | Yes | proteomic (EV)                   |
| MS3_04932 | 1,4-alpha-glucan-branching enzyme isoform 2                  | No  | proteomic (AES, EES, EV)         |
| MS3_04962 | Interferon-related developmental regulator 1                 | No  | bioinformatic                    |
| MS3_04981 | hydroxymethylbilane synthase                                 | No  | proteomic (EV)                   |
| MS3_05000 | putative sodium/potassium-transporting ATPase subunit beta-3 | No  | proteomic (T, EV)                |
| MS3_05002 | Rabenosyn-5                                                  | No  | bioinformatic                    |
| MS3_05011 | Secreted Protein Acidic and Cysteine Rich                    | Yes | bioinformatic                    |
| MS3_05016 | Xaa-Pro dipeptidase                                          | No  | proteomic (AES)                  |
| MS3_05024 | Syntaxin-binding protein 1                                   | No  | proteomic (T)                    |
| MS3_05026 | putative actin-depolymerizing factor                         | No  | proteomic (AES, SEA)             |
| MS3_05034 | Voltage-dependent anion-selective channel protein 2          | No  | proteomic (T, EES)               |
| MS3_05038 | Ubiquitin-fold modifier 1                                    | No  | proteomic (AES, EES)             |
| MS3_05040 | ADIPOR-like receptor                                         | No  | bioinformatic                    |
| MS3_05047 | Calmodulin                                                   | No  | proteomic (AES, EES, SEA)        |
| MS3_05050 | Innexin unc-7                                                | No  | bioinformatic                    |
| MS3_05077 | Guanine nucleotide-binding protein subunit beta              | No  | proteomic (EV)                   |
| MS3_05125 | hypothetical protein MS3_05125                               | No  | proteomic (T, AES, EV)           |
| MS3_05126 | Eukaryotic translation initiation factor 1A                  | No  | bioinformatic                    |
| MS3_05142 | Ribosomal protein L24                                        | No  | bioinformatic                    |
| MS3_05150 | putative sarcoplasmic calcium-binding protein (SCP)          | No  | proteomic (T, AES, SEA, EV)      |
| MS3_05157 | tetraspanin, putative                                        | No  | proteomic (EV)                   |
| MS3_05170 | putative bcl-2 homologous antagonist/killer (bak)            | No  | proteomic (T)                    |
| MS3_05192 | programmed cell death, putative                              | No  | bioinformatic                    |
| MS3_05203 | UPF0764 protein C16orf89 isoform 4                           | Yes | bioinformatic                    |

|           |                                                      |     |                                  |
|-----------|------------------------------------------------------|-----|----------------------------------|
| MS3_05213 | RNA-binding protein 12                               | No  | proteomic (EES)                  |
| MS3_05216 | cysteine protease inhibitor                          | No  | proteomic (T, EES)               |
| MS3_05219 | putative tyrosine 3-monooxygenase                    | No  | bioinformatic                    |
| MS3_05222 | asparaginyl-tRNA synthetase                          | No  | proteomic (EV)                   |
| MS3_05226 | tetraspanin, putative                                | No  | proteomic (AES, EV)              |
| MS3_05230 | small subunit ribosomal protein S17                  | No  | bioinformatic                    |
| MS3_05252 | DM9 domain-containing protein                        | No  | proteomic (T, AES)               |
| MS3_05280 | Histone H3.3                                         | No  | bioinformatic                    |
| MS3_05283 | Adenylosuccinate synthetase                          | No  | proteomic (AES, SEA)             |
| MS3_05284 | Ubiquitin-conjugating enzyme E2 R2                   | No  | bioinformatic                    |
| MS3_05289 | putative tetraspanin 18, isoform 1                   | No  | proteomic (EV)                   |
| MS3_05322 | family S9 non-peptidase homologue (S09 family)       | No  | proteomic (T)                    |
| MS3_05326 | Acetylcholinesterase                                 | No  | bioinformatic                    |
| MS3_05332 | putative beta-galactosidase                          | Yes | proteomic (AES)                  |
| MS3_05337 | Allatostatin-A receptor                              | Yes | bioinformatic                    |
| MS3_05350 | Formin-binding protein 1                             | No  | proteomic (EV)                   |
| MS3_05351 | Dynein light chain                                   | No  | proteomic (T, AES, EV)           |
| MS3_05352 | putative dynein light chain                          | No  | proteomic (EV)                   |
| MS3_05360 | Coiled-coil domain-containing protein 25             | No  | bioinformatic                    |
| MS3_05370 | SJCHGC02540 protein                                  | Yes | bioinformatic                    |
| MS3_05387 | putative arf gtpase-activating protein               | No  | bioinformatic                    |
| MS3_05389 | putative p30 dbc protein                             | No  | bioinformatic                    |
| MS3_05391 | putative 40s ribosomal protein S9                    | No  | bioinformatic                    |
| MS3_05425 | 14 kDa subunit splicing factor 3b                    | No  | bioinformatic                    |
| MS3_05427 | Charged multivesicular body protein                  | No  | bioinformatic                    |
| MS3_05437 | Serine/threonine-protein phosphatase                 | No  | proteomic (T)                    |
| MS3_05447 | Synaptosomal-associated protein 25                   | No  | proteomic (EV)                   |
| MS3_05465 | Isocitrate dehydrogenase [NADP], mitochondrial       | No  | bioinformatic                    |
| MS3_05484 | fragile X related 1, frx1                            | No  | bioinformatic                    |
| MS3_05495 | Lysophospholipid acyltransferase 5                   | No  | proteomic (T)                    |
| MS3_05496 | Solute carrier family 43 member 3                    | No  | bioinformatic                    |
| MS3_05516 | AChain A, Purine-nucleoside Phosphorylase            | No  | proteomic (EES, SEA)             |
| MS3_05520 | putative methylthioadenosine phosphorylase           | No  | proteomic (AES)                  |
| MS3_05530 | Rab GDP dissociation inhibitor alpha                 | No  | proteomic (T, AES, EES, SEA, EV) |
| MS3_05539 | folylpolyglutamate synthase                          | No  | bioinformatic                    |
| MS3_05555 | venom allergen-like (VAL) 7 protein                  | No  | bioinformatic                    |
| MS3_05586 | plasma membrane calcium-transporting atpase,putative | No  | proteomic (T)                    |
| MS3_05587 | Plasma membrane calcium-transporting ATPase 2        | No  | bioinformatic                    |
| MS3_05595 | porphobilinogen synthase                             | No  | proteomic (AES, SEA)             |
| MS3_05600 | Four and a half LIM domains protein 2                | No  | bioinformatic                    |

|           |                                                                                 |     |                                  |
|-----------|---------------------------------------------------------------------------------|-----|----------------------------------|
| MS3_05602 | putative prothymosin alpha-B                                                    | No  | bioinformatic                    |
| MS3_05614 | Neuronal calcium sensor 2                                                       | No  | bioinformatic                    |
| MS3_05631 | Taurocyamine kinase                                                             | No  | proteomic (T, AES, EES, SEA, EV) |
| MS3_05639 | putative ribosomal protein L13                                                  | No  | bioinformatic                    |
| MS3_05646 | hypothetical protein                                                            | Yes | bioinformatic                    |
| MS3_05676 | Cytosolic Fe-S cluster assembly factor NARFL                                    | Yes | bioinformatic                    |
| MS3_05677 | Activator of 90 kDa heat shock protein ATPase homolog 1                         | No  | proteomic (T, EV)                |
| MS3_05686 | Eukaryotic translation initiation factor 3 subunit J-B                          | No  | proteomic (T)                    |
| MS3_05715 | hypothetical protein MS3_05715                                                  | No  | proteomic (T, EV)                |
| MS3_05718 | Myosin-2 essential light chain                                                  | No  | proteomic (SEA, EES)             |
| MS3_05730 | putative endoplasmic                                                            | No  | bioinformatic                    |
| MS3_05734 | Proteasome subunit alpha type-7-like                                            | No  | proteomic (SEA, EV)              |
| MS3_05735 | 16 kDa calcium-binding protein isoform 2                                        | No  | proteomic (T, AES, EV)           |
| MS3_05739 | hypothetical protein MS3_05739                                                  | No  | bioinformatic                    |
| MS3_05748 | zinc finger protein, putative                                                   | No  | bioinformatic                    |
| MS3_05754 | Guanine nucleotide-binding protein G(q) subunit alpha                           | No  | bioinformatic                    |
| MS3_05761 | protein FAM50                                                                   | No  | bioinformatic                    |
| MS3_05836 | putative phospholipid-transporting ATPase IIB                                   | No  | proteomic (EV)                   |
| MS3_05837 | SJCHGC09124 protein                                                             | No  | bioinformatic                    |
| MS3_05896 | putative 60s ribosomal protein L23a                                             | No  | bioinformatic                    |
| MS3_05908 | Ubiquitin-conjugating enzyme E2 L3                                              | No  | proteomic (T, AES)               |
| MS3_05910 | putative rab5                                                                   | No  | proteomic (T, EV)                |
| MS3_05911 | Dynein light chain 2, cytoplasmic                                               | No  | proteomic (EES, SEA, EV)         |
| MS3_05913 | putative tensin                                                                 | No  | proteomic (T, AES)               |
| MS3_05939 | putative Lysosomal Pro-X carboxypeptidase precursor                             | Yes | proteomic (AES, EV)              |
| MS3_05945 | TATA box-binding protein-associated factor RNA polymerase I subunit A           | No  | bioinformatic                    |
| MS3_05950 | 16 kDa calcium-binding protein                                                  | No  | proteomic (T, AES, EES)          |
| MS3_05952 | Tegument antigen                                                                | No  | proteomic (AES, EV)              |
| MS3_05953 | Rho-related GTP-binding protein isoform 1                                       | No  | proteomic (T, EV)                |
| MS3_05958 | Antigen Sm21.7                                                                  | No  | proteomic (T, AES, EES, SEA, EV) |
| MS3_05959 | Tegument antigen                                                                | No  | proteomic (T, AES, EV)           |
| MS3_05960 | Tegument antigen                                                                | No  | proteomic (AES, EES, SEA, EV)    |
| MS3_05976 | putative rab                                                                    | No  | proteomic (T, EV)                |
| MS3_05999 | phosphoglycerate kinase 1                                                       | No  | proteomic (T, AES, EES, SEA, EV) |
| MS3_06009 | Proteasome subunit alpha type-2                                                 | No  | proteomic (SEA, EV)              |
| MS3_06022 | putative eukaryotic translation initiation factor 2 gamma subunit (eif-2-gamma) | No  | bioinformatic                    |
| MS3_06069 | Store-operated calcium entry-associated regulatory factor                       | No  | proteomic (T)                    |
| MS3_06075 | F-actin-capping protein subunit beta                                            | No  | proteomic (EV)                   |
| MS3_06080 | Alpha-soluble NSF attachment protein                                            | No  | proteomic (EV)                   |
| MS3_06101 | apoferritin-2                                                                   | Yes | proteomic (AES, EV)              |

|           |                                                                                  |     |                                  |
|-----------|----------------------------------------------------------------------------------|-----|----------------------------------|
| MS3_06108 | Fasciclin-1 isoform 2                                                            | No  | bioinformatic                    |
| MS3_06112 | SJCHGC07210 protein                                                              | Yes | bioinformatic                    |
| MS3_06125 | serpin, putative                                                                 | No  | proteomic (EV)                   |
| MS3_06126 | sulfide quinone reductase, putative                                              | No  | proteomic (T)                    |
| MS3_06147 | putative aldehyde dehydrogenase                                                  | No  | proteomic (T)                    |
| MS3_06149 | DnaJ subfamily B member 4                                                        | No  | proteomic (AES, EES)             |
| MS3_06161 | ATPase, H <sup>+</sup> transporting, lysosomal, V0 subunit c                     | No  | bioinformatic                    |
| MS3_06167 | Dynein assembly factor with WDR repeat domains 1                                 | No  | bioinformatic                    |
| MS3_06193 | PUR-alpha-like protein                                                           | No  | proteomic (AES)                  |
| MS3_06211 | SJCHGC04876 protein                                                              | No  | bioinformatic                    |
| MS3_06214 | hypothetical protein MS3_06214                                                   | Yes | bioinformatic                    |
| MS3_06223 | Acyl-coenzyme A thioesterase 8                                                   | No  | proteomic (AES, SEA)             |
| MS3_06243 | Eukaryotic translation initiation factor 6                                       | No  | bioinformatic                    |
| MS3_06248 | SJCHGC06557 protein                                                              | No  | proteomic (AES, EV)              |
| MS3_06257 | Exocyst complex component 5                                                      | No  | bioinformatic                    |
| MS3_06258 | Glutamine--tRNA ligase                                                           | No  | bioinformatic                    |
| MS3_06276 | 20S proteasome subunit beta 4                                                    | No  | proteomic (AES)                  |
| MS3_06283 | Dexamethasone-induced Ras-related protein 1                                      | No  | bioinformatic                    |
| MS3_06296 | Splicing factor 3B subunit 2                                                     | No  | bioinformatic                    |
| MS3_06299 | Transmembrane protein isoform 3                                                  | No  | bioinformatic                    |
| MS3_06327 | transmembrane-lke protein isoform 1                                              | Yes | bioinformatic                    |
| MS3_06347 | putative gtp-binding protein rit                                                 | No  | bioinformatic                    |
| MS3_06348 | Mitochondrial-processing peptidase subunit beta                                  | No  | proteomic (T, EES, SEA)          |
| MS3_06368 | 5'-AMP-activated protein kinase subunit beta-1                                   | No  | bioinformatic                    |
| MS3_06380 | Adenylyl cyclase-associated protein 1                                            | No  | proteomic (T, SEA, EV)           |
| MS3_06400 | Epididymal secretory protein E1 precursor (Niemann Pick type C2 protein homolog) | Yes | bioinformatic                    |
| MS3_06403 | Golgi SNAP receptor complex member 1                                             | No  | bioinformatic                    |
| MS3_06424 | Translocator protein                                                             | No  | bioinformatic                    |
| MS3_06430 | putative mitochondrial ATP synthase B chain                                      | No  | proteomic (T)                    |
| MS3_06431 | putative tropomodulin                                                            | No  | bioinformatic                    |
| MS3_06449 | putative mitochondrial 39S ribosomal protein L27 (L27mt) (MRP-L27)               | No  | bioinformatic                    |
| MS3_06462 | Universal stress protein                                                         | No  | proteomic (T)                    |
| MS3_06468 | putative membrane protein isoform 1                                              | No  | bioinformatic                    |
| MS3_06471 | Translationally-controlled tumor protein homolog                                 | No  | proteomic (AES, EV)              |
| MS3_06482 | AChain A, Glutathione S-transferase 28 Kda                                       | No  | proteomic (T, AES, EES, SEA, EV) |
| MS3_06488 | RecQ-mediated genome instability protein 1                                       | No  | bioinformatic                    |
| MS3_06500 | isocitrate dehydrogenase (NAD <sup>+</sup> )                                     | No  | bioinformatic                    |
| MS3_06507 | putative 6-phosphogluconate dehydrogenase                                        | No  | proteomic (AES, SEA, EV)         |
| MS3_06532 | Hormone receptor 4 (dHR4), putative                                              | Yes | bioinformatic                    |
| MS3_06538 | SJCHGC05602 protein                                                              | Yes | bioinformatic                    |

|           |                                                                                   |     |                                  |
|-----------|-----------------------------------------------------------------------------------|-----|----------------------------------|
| MS3_06539 | G1/S-specific cyclin-D2                                                           | No  | bioinformatic                    |
| MS3_06551 | EH domain-containing protein 1                                                    | No  | proteomic (EV)                   |
| MS3_06559 | Kynurenine--oxoglutarate transaminase 3                                           | No  | proteomic (T, AES)               |
| MS3_06583 | ng-dimethylarginine dimethylaminohydrolase                                        | No  | proteomic (T, AES, EES, EV)      |
| MS3_06592 | hydroxyacylglutathione hydrolase                                                  | No  | proteomic (T, AES, SEA)          |
| MS3_06608 | nardilysin (M16 family)                                                           | No  | proteomic (T)                    |
| MS3_06649 | putative dna repair protein xp-E                                                  | No  | proteomic (AES)                  |
| MS3_06668 | ribosomal protein L35                                                             | No  | bioinformatic                    |
| MS3_06669 | T-complex protein 1 subunit zeta                                                  | No  | proteomic (EV)                   |
| MS3_06677 | Dehydrogenase/reductase SDR family member 1                                       | No  | bioinformatic                    |
| MS3_06680 | putative mannose-6-phosphate isomerase                                            | No  | proteomic (AES)                  |
| MS3_06690 | putative rassf                                                                    | No  | bioinformatic                    |
| MS3_06704 | Alpha-1, 3-mannosyl-glycoprotein 2-beta-N-acetylglucosaminyltransferase isoform 2 | No  | bioinformatic                    |
| MS3_06707 | lipase maturation factor                                                          | No  | proteomic (T)                    |
| MS3_06719 | putative phosphoglucomutase                                                       | No  | proteomic (SEA)                  |
| MS3_06729 | putative dual-specificity phosphatase                                             | No  | bioinformatic                    |
| MS3_06732 | Ubiquitin-60S ribosomal protein L40                                               | No  | proteomic (EES)                  |
| MS3_06736 | family C2 unassigned peptidase (C02 family)                                       | No  | proteomic (AES)                  |
| MS3_06740 | Stromal cell-derived factor 2                                                     | Yes | bioinformatic                    |
| MS3_06745 | eukaryotic translation elongation factor 1 beta 2                                 | No  | proteomic (AES)                  |
| MS3_06746 | ADP-ribose pyrophosphatase, mitochondrial precursor                               | No  | proteomic (AES, EES, SEA)        |
| MS3_06748 | Tubulin beta-2C chain                                                             | No  | proteomic (T, AES, EES, EV)      |
| MS3_06769 | 60S ribosome subunit biogenesis protein NIP7                                      | No  | bioinformatic                    |
| MS3_06789 | ATP synthase, subunit d                                                           | Yes | bioinformatic                    |
| MS3_06798 | Retinol dehydrogenase 14                                                          | No  | proteomic (T, AES, EV)           |
| MS3_06807 | SJCHGC01113 protein                                                               | No  | bioinformatic                    |
| MS3_06825 | NADH dehydrogenase [ubiquinone] 1 alpha subcomplex subunit 9, mitochondrial       | No  | proteomic (T)                    |
| MS3_06828 | Calcium-binding mitochondrial carrier protein SCaMC-1                             | No  | proteomic (T)                    |
| MS3_06832 | 3'(2'), 5'-bisphosphate nucleotidase                                              | No  | proteomic (T, AES, SEA, EV)      |
| MS3_06834 | putative succinate dehydrogenase                                                  | No  | bioinformatic                    |
| MS3_06868 | La-related protein 6                                                              | No  | bioinformatic                    |
| MS3_06877 | Long-chain-fatty-acid--CoA ligase 5                                               | No  | bioinformatic                    |
| MS3_06889 | NADH dehydrogenase (ubiquinone) Fe-S protein 7                                    | No  | bioinformatic                    |
| MS3_06898 | Protein MEMO1                                                                     | No  | proteomic (AES)                  |
| MS3_06914 | proteasome (prosome macropain) subunit beta type 4                                | No  | proteomic (AES, SEA)             |
| MS3_06918 | Protein DJ-1                                                                      | No  | proteomic (T, AES, EES, SEA, EV) |
| MS3_06928 | T-complex protein 1 subunit delta                                                 | No  | proteomic (AES, SEA, EV)         |
| MS3_06944 | putative profilin splice variant 4                                                | No  | proteomic (T, EV)                |
| MS3_06947 | X-box-binding protein                                                             | No  | bioinformatic                    |
| MS3_06950 | Three prime repair exonuclease 1                                                  | No  | bioinformatic                    |

|           |                                                                                                          |     |                                  |
|-----------|----------------------------------------------------------------------------------------------------------|-----|----------------------------------|
| MS3_06979 | putative growth factor receptor-bound protein                                                            | No  | bioinformatic                    |
| MS3_06994 | ribosomal protein L28                                                                                    | No  | bioinformatic                    |
| MS3_07002 | SJCHGC06187 protein                                                                                      | No  | bioinformatic                    |
| MS3_07010 | 1-acyl-sn-glycerol-3-phosphate o-acyltransferase                                                         | No  | bioinformatic                    |
| MS3_07037 | Zinc finger with UFM1-specific peptidase domain protein                                                  | No  | bioinformatic                    |
| MS3_07045 | Dehydrogenase/reductase SDR family member 1                                                              | No  | proteomic (T)                    |
| MS3_07061 | Putative tRNA (cytidine(32)/guanosine(34)-2'-O)-methyltransferase                                        | No  | bioinformatic                    |
| MS3_07096 | SJCHGC06267 protein                                                                                      | No  | bioinformatic                    |
| MS3_07105 | Mitogen-activated protein kinase 3                                                                       | No  | proteomic (EV)                   |
| MS3_07125 | cytochrome c oxidase subunit IV                                                                          | No  | proteomic (T)                    |
| MS3_07126 | Exosome complex component RRP41                                                                          | No  | bioinformatic                    |
| MS3_07156 | acyl-CoA:glycerol-3-phosphate acyltransferase                                                            | No  | bioinformatic                    |
| MS3_07158 | Dihydrolipoyllysine-residue acetyltransferase component of pyruvate dehydrogenase complex, mitochondrial | No  | proteomic (SEA)                  |
| MS3_07178 | putative ferritin                                                                                        | No  | proteomic (T, AES, EES, EV)      |
| MS3_07195 | Ribosomal protein S11                                                                                    | No  | bioinformatic                    |
| MS3_07213 | SJCHGC01055 protein                                                                                      | No  | bioinformatic                    |
| MS3_07231 | ornithine--oxo-acid transaminase                                                                         | No  | proteomic (EES, SEA)             |
| MS3_07273 | Lamin-B receptor                                                                                         | No  | bioinformatic                    |
| MS3_07280 | protein kiaa0174, putative                                                                               | No  | bioinformatic                    |
| MS3_07294 | venom allergen-like (VAL) 28 protein                                                                     | Yes | proteomic (EES, SEA)             |
| MS3_07299 | Protein canopy 4                                                                                         | Yes | bioinformatic                    |
| MS3_07304 | Protein jagunal 1                                                                                        | No  | bioinformatic                    |
| MS3_07337 | putative dolichyl-diphosphooligosaccharide-protein glycosyltransferase                                   | Yes | bioinformatic                    |
| MS3_07345 | Inorganic pyrophosphatase                                                                                | No  | proteomic (T, AES, EES, SEA, EV) |
| MS3_07347 | SJCHGC01026 protein                                                                                      | No  | proteomic (EV)                   |
| MS3_07363 | Heterogeneous nuclear ribonucleoprotein K                                                                | No  | proteomic (AES, EES)             |
| MS3_07370 | actin beta/gamma 1                                                                                       | No  | proteomic (AES)                  |
| MS3_07372 | Phosphatase 2A inhibitor I2PP2A                                                                          | No  | proteomic (AES, EES, EV)         |
| MS3_07374 | Actin alpha cardiac muscle 1                                                                             | No  | proteomic (EV)                   |
| MS3_07390 | NADH dehydrogenase [ubiquinone] iron-sulfur protein 4, mitochondrial                                     | No  | bioinformatic                    |
| MS3_07395 | Vesicular integral-membrane protein isoform 3                                                            | No  | bioinformatic                    |
| MS3_07403 | Glutamine synthetase                                                                                     | No  | proteomic (SEA)                  |
| MS3_07405 | putative immunoglobulin domain superfamily (sensory guidance protein)                                    | No  | proteomic (AES)                  |
| MS3_07406 | putative deferrochelataase/peroxidase YfeX                                                               | No  | bioinformatic                    |
| MS3_07411 | putative deferrochelataase/peroxidase YfeX                                                               | No  | proteomic (T)                    |
| MS3_07419 | putative spfh domain protein 1 precursor                                                                 | No  | bioinformatic                    |
| MS3_07420 | NADH dehydrogenase (ubiquinone) 1 beta subcomplex 8                                                      | Yes | bioinformatic                    |
| MS3_07422 | hypothetical protein MS3_07422                                                                           | No  | proteomic (EV)                   |
| MS3_07464 | F-type H <sup>+</sup> -transporting ATPase subunit alpha                                                 | No  | proteomic (T, EES, SEA)          |
| MS3_07465 | Prostatic acid phosphatase                                                                               | No  | proteomic (AES, EV)              |

|           |                                                                       |     |                                  |
|-----------|-----------------------------------------------------------------------|-----|----------------------------------|
| MS3_07467 | putative atp synthase alpha subunit mitochondrial                     | No  | proteomic (T, EES)               |
| MS3_07473 | putative marvel-containing potential lipid raft-associated protein    | No  | proteomic (T, EV)                |
| MS3_07481 | fimbrin, putative                                                     | No  | proteomic (T, AES, EV)           |
| MS3_07487 | putative succinate dehydrogenase                                      | No  | proteomic (T)                    |
| MS3_07509 | putative cop-coated vesicle membrane protein P24 (emp24/gp251 family) | Yes | bioinformatic                    |
| MS3_07520 | putative 26s proteasome non-ATPase regulatory subunit                 | No  | bioinformatic                    |
| MS3_07531 | Peroxiredoxin, Prx3                                                   | No  | proteomic (T, AES, SEA)          |
| MS3_07565 | SJCHGC01333 protein                                                   | No  | bioinformatic                    |
| MS3_07569 | tetraspanin, putative                                                 | No  | bioinformatic                    |
| MS3_07587 | programmed cell death protein, putative                               | No  | bioinformatic                    |
| MS3_07590 | Reticulon-4-interacting protein 1-like protein, mitochondrial         | No  | bioinformatic                    |
| MS3_07593 | Sorcin                                                                | No  | proteomic (EV)                   |
| MS3_07594 | Immunoglobulin-like domain-containing protein                         | Yes | proteomic (T, AES, EV)           |
| MS3_07600 | rab11, putative                                                       | No  | proteomic (EV)                   |
| MS3_07606 | phosphoglycerate mutase                                               | No  | proteomic (T, AES, EES, SEA, EV) |
| MS3_07612 | 40S ribosomal protein                                                 | No  | bioinformatic                    |
| MS3_07617 | putative map kinase phosphatase                                       | No  | proteomic (EV)                   |
| MS3_07637 | NADH dehydrogenase (ubiquinone) 1 alpha subcomplex subunit 10         | No  | bioinformatic                    |
| MS3_07650 | hypothetical protein MS3_07650                                        | No  | bioinformatic                    |
| MS3_07651 | Ubiquitin-conjugating enzyme E2-24 kDa                                | No  | bioinformatic                    |
| MS3_07685 | FChain F, Histone H4                                                  | No  | proteomic (AES, EES, SEA, EV)    |
| MS3_07686 | Histone H4                                                            | No  | proteomic (AES, EV)              |
| MS3_07693 | putative titin                                                        | No  | proteomic (T, AES)               |
| MS3_07702 | Troponin T                                                            | No  | proteomic (T, AES, EV)           |
| MS3_07716 | phosphatidylinositol transfer protein                                 | No  | bioinformatic                    |
| MS3_07729 | putative hsp40, subfamily A, members 1,2,4                            | No  | proteomic (T, EV)                |
| MS3_07737 | histone H2A                                                           | No  | proteomic (EES)                  |
| MS3_07738 | MEG-8 family                                                          | No  | bioinformatic                    |
| MS3_07757 | Casein kinase II subunit alpha                                        | No  | proteomic (EV)                   |
| MS3_07763 | Succinyl-CoA ligase [ADP-forming] subunit beta, mitochondrial         | No  | proteomic (T)                    |
| MS3_07795 | IQ domain-containing protein G                                        | No  | bioinformatic                    |
| MS3_07799 | Reticulon-4 (Neurite outgrowth inhibitor)                             | No  | bioinformatic                    |
| MS3_07816 | E3 ubiquitin-protein ligase                                           | No  | bioinformatic                    |
| MS3_07822 | SJCHGC04172 protein                                                   | Yes | bioinformatic                    |
| MS3_07823 | egg protein CP391S-like protein                                       | Yes | bioinformatic                    |
| MS3_07824 | putative centromere protein A (cenp-A) (centromere autoantigen A)     | No  | bioinformatic                    |
| MS3_07831 | putative shc transforming protein                                     | No  | proteomic (EV)                   |
| MS3_07854 | putative rab-2,4,14                                                   | No  | proteomic (T, EV)                |
| MS3_07874 | 26S proteasome non-ATPase regulatory subunit 12                       | No  | bioinformatic                    |
| MS3_07885 | rab-related GTP-binding protein                                       | No  | bioinformatic                    |



|           |                                                                        |     |                                  |
|-----------|------------------------------------------------------------------------|-----|----------------------------------|
| MS3_07892 | Guanine nucleotide-binding protein subunit beta                        | No  | proteomic (T)                    |
| MS3_07905 | adenylate cyclase isoform 1                                            | No  | proteomic (T)                    |
| MS3_07918 | hypothetical protein MS3_07918                                         | No  | bioinformatic                    |
| MS3_07944 | Spliceosome RNA helicase DDX39B                                        | No  | bioinformatic                    |
| MS3_07968 | cell division control protein 45                                       | No  | proteomic (EV)                   |
| MS3_07972 | ferritin, heavy polypeptide 1                                          | No  | proteomic (AES, EV)              |
| MS3_07988 | putative ef hand containing protein                                    | Yes | proteomic (AES)                  |
| MS3_07994 | hypothetical protein                                                   | No  | bioinformatic                    |
| MS3_08000 | glycerol-3-phosphate dehydrogenase 1                                   | No  | proteomic (T, AES, SEA, EV)      |
| MS3_08004 | Calcyphosin-like protein                                               | No  | bioinformatic                    |
| MS3_08008 | aminoacylase (M20 family)                                              | No  | proteomic (AES, EES, SEA)        |
| MS3_08019 | putative immunophilin                                                  | No  | proteomic (AES, EES, SEA)        |
| MS3_08024 | cathepsin B                                                            | No  | proteomic (T, AES)               |
| MS3_08037 | putative ribonuclease z, chloroplast                                   | No  | proteomic (AES)                  |
| MS3_08042 | Alpha-1,6-mannosyl-glycoprotein 2-beta-N-acetylglucosaminyltransferase | No  | bioinformatic                    |
| MS3_08059 | Ferritin-1 heavy chain                                                 | No  | proteomic (AES, SEA, EV)         |
| MS3_08087 | putative dead box ATP-dependent RNA helicase                           | No  | bioinformatic                    |
| MS3_08094 | putative secretory carrier membrane protein                            | No  | bioinformatic                    |
| MS3_08105 | Peptidyl-prolyl cis-trans isomerase B                                  | Yes | bioinformatic                    |
| MS3_08144 | TM2 domain-containing protein 3                                        | No  | bioinformatic                    |
| MS3_08157 | Trematode Eggshell Synthesis domain containing protein                 | Yes | bioinformatic                    |
| MS3_08158 | Trematode Eggshell Synthesis domain containing protein                 | Yes | bioinformatic                    |
| MS3_08159 | Trematode Eggshell Synthesis domain containing protein                 | Yes | bioinformatic                    |
| MS3_08160 | Proactivator polypeptide                                               | No  | proteomic (AES, EES, EV)         |
| MS3_08161 | Female-specific protein 800                                            | Yes | bioinformatic                    |
| MS3_08162 | RNA-binding protein EWS                                                | No  | bioinformatic                    |
| MS3_08169 | Casein kinase II subunit beta                                          | No  | bioinformatic                    |
| MS3_08176 | Adenylate kinase isoenzyme 6 isoform 1                                 | No  | bioinformatic                    |
| MS3_08178 | hypothetical protein MS3_08178                                         | No  | proteomic (AES)                  |
| MS3_08210 | Survival of motor neuron-related-splicing factor 30                    | No  | bioinformatic                    |
| MS3_08216 | putative transaldolase isoform 1                                       | No  | proteomic (T, AES, SEA)          |
| MS3_08220 | eukaryotic translation initiation factor, putative                     | No  | proteomic (EV)                   |
| MS3_08262 | Cell division control protein 42-like protein                          | No  | proteomic (T)                    |
| MS3_08276 | Basement membrane-specific heparan sulfate proteoglycan core protein   | No  | proteomic (AES)                  |
| MS3_08283 | putative glypican                                                      | Yes | bioinformatic                    |
| MS3_08337 | putative cation-transporting atpase worm                               | No  | bioinformatic                    |
| MS3_08361 | Elongation factor 2                                                    | No  | proteomic (T, AES, EES, SEA, EV) |
| MS3_08366 | putative crp1/csrp1/crip1                                              | No  | proteomic (T, AES)               |
| MS3_08391 | putative talin                                                         | No  | bioinformatic                    |
| MS3_08398 | NADH dehydrogenase ubiquinone 1 beta                                   | No  | bioinformatic                    |

|           |                                                                      |     |                                  |
|-----------|----------------------------------------------------------------------|-----|----------------------------------|
| MS3_08399 | T-complex protein 1 subunit theta                                    | No  | proteomic (EES, EV)              |
| MS3_08413 | Zinc finger and BTB domain-containing protein                        | No  | bioinformatic                    |
| MS3_08415 | Coatomer subunit epsilon                                             | No  | bioinformatic                    |
| MS3_08432 | phosphatase 2C                                                       | No  | bioinformatic                    |
| MS3_08440 | Cathepsin K                                                          | No  | proteomic (AES)                  |
| MS3_08444 | Tegument antigen                                                     | No  | bioinformatic                    |
| MS3_08446 | Tegument antigen                                                     | No  | proteomic (T, AES, EV)           |
| MS3_08450 | Putative aminopeptidase W07G4.4                                      | No  | proteomic (T, AES, EES, EV)      |
| MS3_08455 | COP9 signalosome complex subunit 7b                                  | No  | bioinformatic                    |
| MS3_08460 | AChain A, Thioredoxin Peroxidase                                     | No  | proteomic (EES, SEA, EV)         |
| MS3_08472 | Calreticulin                                                         | Yes | proteomic (T, EES, SEA)          |
| MS3_08479 | eukaryotic translation elongation factor 1 alpha 2                   | No  | proteomic (T, AES, EES, SEA, EV) |
| MS3_08480 | High affinity cationic amino acid transporter 1                      | No  | proteomic (T)                    |
| MS3_08498 | Cathepsin C                                                          | Yes | proteomic (SEA, EV)              |
| MS3_08503 | venom allergen-like (VAL) 6 protein                                  | No  | proteomic (T, AES, EV)           |
| MS3_08504 | venom allergen-like (VAL) 6 protein                                  | No  | proteomic (T, AES)               |
| MS3_08509 | ATP-dependent RNA helicase DED1                                      | No  | bioinformatic                    |
| MS3_08530 | peptidylprolyl isomerase                                             | No  | proteomic (T, AES, EES, EV)      |
| MS3_08533 | GTP-binding nuclear protein Ran                                      | No  | bioinformatic                    |
| MS3_08539 | H/ACA ribonucleoprotein complex subunit 1                            | No  | bioinformatic                    |
| MS3_08593 | putative guanine nucleotide-binding protein beta 5 (G protein beta5) | No  | bioinformatic                    |
| MS3_08607 | putative zinc finger protein                                         | No  | proteomic (T, EV)                |
| MS3_08613 | mitogen-activated protein kinase kinase 1                            | No  | proteomic (EV)                   |
| MS3_08618 | Ribosomal protein S5a                                                | No  | bioinformatic                    |
| MS3_08625 | putative annexin                                                     | No  | bioinformatic                    |
| MS3_08636 | calcineurin B                                                        | No  | bioinformatic                    |
| MS3_08655 | LIM domain-containing protein unc-97                                 | No  | bioinformatic                    |
| MS3_08663 | Serine/threonine-protein kinase NIM1                                 | No  | proteomic (EV)                   |
| MS3_08689 | Synaptic vesicle membrane protein VAT-1-like protein                 | No  | proteomic (T, AES, EV)           |
| MS3_08692 | Pre-mRNA-processing factor 19                                        | No  | bioinformatic                    |
| MS3_08717 | NADH dehydrogenase [ubiquinone] 1 alpha subcomplex subunit 13        | No  | bioinformatic                    |
| MS3_08723 | Annexin A7                                                           | No  | proteomic (T, AES, EV)           |
| MS3_08725 | putative annexin                                                     | No  | proteomic (T, AES, EV)           |
| MS3_08726 | putative ribosomal protein S2, eukaryotic and archaeal form          | No  | bioinformatic                    |
| MS3_08727 | SJCHGC09795 protein                                                  | No  | bioinformatic                    |
| MS3_08737 | Kazal-type serine protease inhibitor domain-containing protein 1     | Yes | bioinformatic                    |
| MS3_08776 | Serine/threonine-protein phosphatase PP1-gamma catalytic subunit     | No  | bioinformatic                    |
| MS3_08805 | Protein C20orf11 homolog                                             | No  | bioinformatic                    |
| MS3_08808 | proteasome (prosome, macropain) subunit, beta type 5                 | No  | proteomic (EES, EV)              |
| MS3_08811 | putative ribosomal protein L4                                        | No  | bioinformatic                    |

|           |                                                                                                    |     |                                  |
|-----------|----------------------------------------------------------------------------------------------------|-----|----------------------------------|
| MS3_08823 | Transmembrane protein 85                                                                           | No  | bioinformatic                    |
| MS3_08826 | Alcohol dehydrogenase class-3                                                                      | No  | proteomic (AES)                  |
| MS3_08839 | putative 60s ribosomal protein L6                                                                  | No  | proteomic (AES)                  |
| MS3_08840 | AP-2 complex subunit sigma                                                                         | No  | bioinformatic                    |
| MS3_08871 | NADH dehydrogenase [ubiquinone] iron-sulfur protein 3, mitochondrial                               | No  | bioinformatic                    |
| MS3_08891 | Mitochondrial carnitine/acylcarnitine carrier protein                                              | No  | proteomic (T)                    |
| MS3_08903 | putative poly(p)/ATP NAD kinase                                                                    | No  | bioinformatic                    |
| MS3_08907 | alkaline phosphatase                                                                               | No  | proteomic (T)                    |
| MS3_08925 | Aldehyde dehydrogenase X, mitochondrial                                                            | No  | proteomic (EES, SEA, EV)         |
| MS3_08926 | 60 kDa heat shock protein, mitochondrial                                                           | No  | proteomic (T, EES, SEA, EV)      |
| MS3_08929 | hypothetical protein                                                                               | No  | bioinformatic                    |
| MS3_08937 | Pyruvate kinase PKM                                                                                | No  | proteomic (T, AES, EES, SEA, EV) |
| MS3_08943 | hypothetical protein MS3_0013354                                                                   | No  | bioinformatic                    |
| MS3_08945 | Dipeptidyl peptidase 3                                                                             | No  | bioinformatic                    |
| MS3_08953 | Golgi phosphoprotein 3                                                                             | No  | bioinformatic                    |
| MS3_08954 | dihydropyrimidinase (M38 family)                                                                   | No  | proteomic (EV)                   |
| MS3_08975 | DnaJ subfamily C member 5                                                                          | No  | bioinformatic                    |
| MS3_08996 | Cytochrome C Oxidase                                                                               | No  | proteomic (EES)                  |
| MS3_08999 | Vesicle-associated membrane protein 8                                                              | No  | proteomic (EV)                   |
| MS3_09000 | chmp1 (chromatin modifying protein) (charged multivesicular body protein), putative                | No  | bioinformatic                    |
| MS3_09070 | alkaline phosphatase                                                                               | Yes | proteomic (T, EV)                |
| MS3_09073 | phosphatidylcholine-sterol acyltransferase (lecithin-cholesterol acyltransferase)/ Phospholipase A | No  | bioinformatic                    |
| MS3_09076 | Ectonucleoside triphosphate diphosphohydrolase 4                                                   | No  | proteomic (T, EV)                |
| MS3_09086 | Glycogenin-1 isoform 2                                                                             | No  | proteomic (SEA, EV)              |
| MS3_09089 | putative ATP-dependent RNA helicase ddx6                                                           | No  | bioinformatic                    |
| MS3_09110 | putative rac gtpase                                                                                | No  | proteomic (T)                    |
| MS3_09119 | eukaryotic translation initiation factor, putative                                                 | No  | bioinformatic                    |
| MS3_09124 | Nucleotide exchange factor SIL1                                                                    | No  | bioinformatic                    |
| MS3_09128 | L-2-hydroxyglutarate dehydrogenase, mitochondrial                                                  | No  | bioinformatic                    |
| MS3_09160 | putative arginine/serine-rich splicing factor                                                      | No  | bioinformatic                    |
| MS3_09161 | Thymidylate kinase                                                                                 | No  | proteomic (AES)                  |
| MS3_09175 | Aquaporin-3 (AQP-3)                                                                                | No  | proteomic (T, EV)                |
| MS3_09188 | SIHG04269 protein                                                                                  | No  | bioinformatic                    |
| MS3_09190 | Geranylgeranyl pyrophosphate synthase                                                              | No  | proteomic (T, AES)               |
| MS3_09198 | CD63 antigen                                                                                       | No  | proteomic (T, EV)                |
| MS3_09207 | hemoglobinase (C13 family)                                                                         | Yes | proteomic (EV)                   |
| MS3_09229 | NudC domain-containing protein 2                                                                   | No  | bioinformatic                    |
| MS3_09231 | Guanine nucleotide-binding protein subunit beta                                                    | No  | proteomic (EV)                   |
| MS3_09233 | superoxide dismutase 1, soluble                                                                    | No  | proteomic (T, AES)               |
| MS3_09240 | Protein I(2)37Cc                                                                                   | No  | proteomic (T)                    |

|           |                                                                             |     |                           |
|-----------|-----------------------------------------------------------------------------|-----|---------------------------|
| MS3_09253 | hypothetical protein                                                        | Yes | proteomic (AES, EV)       |
| MS3_09271 | 60S ribosomal protein L14, putative                                         | No  | bioinformatic             |
| MS3_09273 | Regulator of nonsense transcripts 3A                                        | No  | bioinformatic             |
| MS3_09274 | KH domain-containing, RNA-binding, signal transduction-associated protein 1 | No  | proteomic (EES)           |
| MS3_09276 | transcription elongation factor B, polypeptide 2                            | No  | proteomic (AES)           |
| MS3_09283 | ribosomal protein L3                                                        | No  | bioinformatic             |
| MS3_09286 | putative adenylate kinase 1                                                 | No  | proteomic (T, EES)        |
| MS3_09287 | putative uv excision repair protein rad23                                   | No  | bioinformatic             |
| MS3_09290 | putative pyruvate dehydrogenase                                             | No  | proteomic (T, SEA)        |
| MS3_09296 | Cysteine desulfurase                                                        | No  | proteomic (T)             |
| MS3_09305 | adenine phosphoribosyltransferase                                           | No  | proteomic (AES, EV)       |
| MS3_09333 | Charged multivesicular body protein 2a (Chromatin-modifying protein 2a)     | No  | bioinformatic             |
| MS3_09353 | Histone H1-delta                                                            | No  | proteomic (EES)           |
| MS3_09371 | putative nebulin                                                            | No  | proteomic (AES)           |
| MS3_09396 | Complement C1q tumor necrosis factor-related protein 3                      | No  | bioinformatic             |
| MS3_09406 | 23 kDa integral membrane protein                                            | No  | bioinformatic             |
| MS3_09415 | putative cop-coated vesicle membrane protein P24 (emp24/gp251 family)       | No  | bioinformatic             |
| MS3_09426 | hypothetical protein MS3_09426                                              | No  | bioinformatic             |
| MS3_09427 | Receptor-type tyrosine-protein phosphatase gamma                            | No  | bioinformatic             |
| MS3_09434 | V-type proton ATPase subunit F                                              | No  | proteomic (EV)            |
| MS3_09443 | Synaptosomal-associated protein 25                                          | No  | bioinformatic             |
| MS3_09457 | putative succinate dehydrogenase iron-sulfur protein                        | Yes | proteomic (T)             |
| MS3_09465 | Methionine aminopeptidase 1D, chloroplastic/mitochondrial                   | No  | bioinformatic             |
| MS3_09473 | histidine triad nucleotide binding protein 1                                | No  | proteomic (AES, EES, SEA) |
| MS3_09489 | Stress-70 protein isoform 1                                                 | No  | proteomic (T, SEA)        |
| MS3_09510 | Phosphate carrier protein, mitochondrial precursor                          | No  | proteomic (T, EES)        |
| MS3_09521 | putative clathrin coat adaptor ap3 medium chain                             | No  | bioinformatic             |
| MS3_09536 | putative flotillin-1                                                        | No  | bioinformatic             |
| MS3_09546 | synaptic glycoprotein sc2 related                                           | No  | bioinformatic             |
| MS3_09569 | subfamily C1A unassigned peptidase (C01 family)                             | Yes | bioinformatic             |
| MS3_09613 | hypothetical protein MS3_09613                                              | No  | proteomic (EV)            |
| MS3_09619 | putative carbonyl reductase                                                 | No  | proteomic (EES)           |
| MS3_09620 | carbonyl reductase 1                                                        | No  | proteomic (T, AES)        |
| MS3_09626 | serine/threonine-protein phosphatase 4 regulatory subunit 2                 | No  | bioinformatic             |
| MS3_09632 | ATP synthase gamma subunit                                                  | No  | bioinformatic             |
| MS3_09634 | Ras-related protein Rab-3C                                                  | No  | proteomic (T)             |
| MS3_09638 | putative ATP-dependent RNA helicase DHX36                                   | No  | bioinformatic             |
| MS3_09640 | putative myosin-10 (Myosin heavy chain, nonmuscle IIb)                      | No  | proteomic (EV)            |
| MS3_09644 | long-chain-fatty-acid--CoA ligase                                           | No  | proteomic (T)             |
| MS3_09652 | Type 2 phosphatidylinositol 4,5-bisphosphate 4-phosphatase                  | No  | proteomic (EV)            |

|           |                                                                         |     |                                  |
|-----------|-------------------------------------------------------------------------|-----|----------------------------------|
| MS3_09662 | Vacuolar-sorting protein isoform 2                                      | No  | bioinformatic                    |
| MS3_09682 | thioredoxin 1                                                           | No  | proteomic (T, EES, SEA)          |
| MS3_09683 | Zinc finger DBF type isoform 2                                          | No  | bioinformatic                    |
| MS3_09684 | Bone marrow proteoglycan                                                | Yes | bioinformatic                    |
| MS3_09690 | putative kunitz-type protease inhibitor                                 | Yes | bioinformatic                    |
| MS3_09691 | putative small subunit ribosomal protein S27Ae                          | No  | bioinformatic                    |
| MS3_09692 | Protein FAM98A                                                          | No  | bioinformatic                    |
| MS3_09698 | CD9-like protein Sm-TSP-1                                               | No  | bioinformatic                    |
| MS3_09700 | Iron/zinc purple acid phosphatase-like protein                          | No  | proteomic (AES)                  |
| MS3_09735 | putative ribonuclease t2                                                | No  | proteomic (EES, SEA)             |
| MS3_09739 | High affinity copper uptake protein 1                                   | No  | proteomic (EV)                   |
| MS3_09744 | Ribosome-binding protein 1 (Ribosome receptor protein) (mRRp), putative | No  | bioinformatic                    |
| MS3_09778 | cathepsin B-like peptidase (C01 family)                                 | No  | proteomic (AES)                  |
| MS3_09779 | cathepsin B-like peptidase (C01 family)                                 | Yes | proteomic (EV)                   |
| MS3_09780 | 10 kDa heat shock protein, mitochondrial                                | No  | proteomic (T, AES, EES, SEA)     |
| MS3_09793 | putative chromobox protein                                              | No  | bioinformatic                    |
| MS3_09810 | steroid dehydrogenase, putative                                         | No  | proteomic (T)                    |
| MS3_09826 | Protein FAM136A                                                         | No  | bioinformatic                    |
| MS3_09828 | Rho GDP-dissociation inhibitor 2                                        | No  | bioinformatic                    |
| MS3_09829 | THO complex subunit 3                                                   | No  | bioinformatic                    |
| MS3_09846 | 20 kDa calcium-binding protein                                          | No  | proteomic (AES, EES, SEA, EV)    |
| MS3_09865 | Coatomer subunit delta                                                  | No  | bioinformatic                    |
| MS3_09879 | 3-hydroxyacyl-CoA dehydrogenase type-2                                  | No  | bioinformatic                    |
| MS3_09903 | Thimet oligopeptidase                                                   | No  | proteomic (T, AES, EES)          |
| MS3_09942 | putative rab-18                                                         | No  | bioinformatic                    |
| MS3_09952 | 26S proteasome regulatory subunit T4                                    | No  | bioinformatic                    |
| MS3_09958 | putative Stress-induced-phosphoprotein 1                                | No  | proteomic (T, EES, SEA, EV)      |
| MS3_09961 | eupitrylsin (M16 family)                                                | No  | proteomic (SEA)                  |
| MS3_09970 | complement inhibitory receptor                                          | No  | bioinformatic                    |
| MS3_09993 | bestrophin-related protein                                              | No  | bioinformatic                    |
| MS3_10002 | putative alpha-galactosidase/alpha-n-acetylgalactosaminidase            | No  | proteomic (EES, SEA)             |
| MS3_10017 | AChain A, Thioredoxin Glutathione Reductase                             | No  | proteomic (AES, SEA)             |
| MS3_10022 | Proteasome assembly chaperone 2                                         | No  | bioinformatic                    |
| MS3_10028 | Cytochrome b561                                                         | No  | bioinformatic                    |
| MS3_10036 | Neutral ceramidase                                                      | No  | proteomic (EV)                   |
| MS3_10044 | Eukaryotic translation initiation factor 3 subunit G                    | No  | bioinformatic                    |
| MS3_10083 | SJCHGC02513 protein                                                     | No  | bioinformatic                    |
| MS3_10085 | thioredoxin 1                                                           | No  | proteomic (T, AES, EES, SEA, EV) |
| MS3_10116 | 60S ribosomal protein L23                                               | No  | bioinformatic                    |
| MS3_10138 | Glycine receptor subunit alpha-3                                        | Yes | bioinformatic                    |

|           |                                                                         |     |                                  |
|-----------|-------------------------------------------------------------------------|-----|----------------------------------|
| MS3_10141 | glyceraldehyde 3-phosphate dehydrogenase                                | No  | proteomic (SEA, EV)              |
| MS3_10148 | lipopolysaccharide-induced tumor necrosis factor-alpha factor           | No  | bioinformatic                    |
| MS3_10161 | GTP-binding protein ypt2                                                | No  | proteomic (T)                    |
| MS3_10177 | Eukaryotic translation initiation factor 3 subunit F                    | No  | bioinformatic                    |
| MS3_10184 | Gamma-crystallin related domain-containing protein                      | Yes | proteomic (T, AES, EES, SEA)     |
| MS3_10186 | putative interleukin-4-inducing protein precursor                       | Yes | bioinformatic                    |
| MS3_10187 | disulfide-isomerase ER-60 precursor (ERP60)                             | No  | proteomic (T, AES, EES, SEA)     |
| MS3_10188 | protein kinase                                                          | No  | bioinformatic                    |
| MS3_10193 | Ras-related protein Rab-2B                                              | No  | proteomic (T, EV)                |
| MS3_10194 | Charged multivesicular body protein 5                                   | No  | proteomic (EV)                   |
| MS3_10209 | Major egg antigen                                                       | No  | proteomic (T, AES, EES, SEA, EV) |
| MS3_10221 | Transmembrane emp24 domain-containing protein 4 precursor               | Yes | bioinformatic                    |
| MS3_10225 | transcript=A_05711 gene=A_05711                                         | No  | bioinformatic                    |
| MS3_10249 | Proteasome subunit beta type-7                                          | No  | proteomic (EV)                   |
| MS3_10252 | steroid dehydrogenase, putative                                         | Yes | bioinformatic                    |
| MS3_10288 | putative tpa_exp: ORF3                                                  | No  | bioinformatic                    |
| MS3_10292 | Zinc finger CCCH domain-containing protein 3                            | No  | bioinformatic                    |
| MS3_10297 | ribosomal protein L30                                                   | No  | bioinformatic                    |
| MS3_10305 | DNA mismatch repair protein Msh2                                        | No  | bioinformatic                    |
| MS3_10345 | putative alpha-galactosidase/alpha-n-acetylgalactosaminidase            | No  | proteomic (EES, SEA)             |
| MS3_10378 | 26S proteasome regulatory subunit S3, putative                          | No  | bioinformatic                    |
| MS3_10385 | Estrogen-regulated protein EP45 precursor                               | Yes | proteomic (T, AES, EV)           |
| MS3_10397 | 60S acidic ribosomal protein P0                                         | No  | bioinformatic                    |
| MS3_10421 | 40S ribosomal protein S12                                               | No  | bioinformatic                    |
| MS3_10423 | putative phospholipid-transporting ATPase IA                            | No  | bioinformatic                    |
| MS3_10440 | Endonuclease/exonuclease/phosphatase family domain-containing protein 1 | No  | bioinformatic                    |
| MS3_10459 | nucleoside diphosphate kinase homolog 5-like                            | No  | bioinformatic                    |
| MS3_10471 | putative atp-dependent RNA helicase                                     | No  | bioinformatic                    |
| MS3_10472 | putative n-acetyltransferase                                            | No  | bioinformatic                    |
| MS3_10475 | seryl-tRNA synthetase                                                   | No  | bioinformatic                    |
| MS3_10485 | GPI-anchored membrane protein 1                                         | No  | bioinformatic                    |
| MS3_10486 | Ras-related protein RABH1b                                              | No  | proteomic (T)                    |
| MS3_10489 | Eukaryotic translation initiation factor 4H                             | No  | bioinformatic                    |
| MS3_10492 | putative ribosomal protein L31                                          | No  | bioinformatic                    |
| MS3_10493 | tyrosinase precursor                                                    | No  | bioinformatic                    |
| MS3_10499 | hypothetical protein MS3_10499, partial                                 | No  | bioinformatic                    |
| MS3_10510 | putative l-lactate dehydrogenase                                        | No  | proteomic (T, AES, SEA, EV)      |
| MS3_10513 | putative ribosomal protein L15                                          | No  | bioinformatic                    |
| MS3_10572 | T-complex protein 1 subunit alpha                                       | No  | proteomic (T, EES, SEA, EV)      |
| MS3_10588 | Alkaline phosphatase                                                    | No  | proteomic (EES, EV)              |

|           |                                                                             |     |                                  |
|-----------|-----------------------------------------------------------------------------|-----|----------------------------------|
| MS3_10590 | importin alpha 3,4, putative                                                | No  | proteomic (EV)                   |
| MS3_10591 | hypothetical protein MS3_10591, partial                                     | No  | proteomic (EV)                   |
| MS3_10600 | Ribosomal protein S19a                                                      | No  | bioinformatic                    |
| MS3_10607 | hypothetical protein MS3_10607                                              | No  | bioinformatic                    |
| MS3_10619 | AFG3-like protein 2                                                         | No  | bioinformatic                    |
| MS3_10671 | Gamma-soluble NSF attachment protein                                        | No  | proteomic (EV)                   |
| MS3_10687 | Cathepsin B-like cysteine proteinase                                        | No  | bioinformatic                    |
| MS3_10713 | putative heat shock protein 70 (hsp70)                                      | Yes | proteomic (T, AES, EES, SEA, EV) |
| MS3_10721 | von Willebrand factor A domain-containing protein                           | No  | proteomic (AES, EV)              |
| MS3_10729 | cytochrome c oxidase subunit III                                            | No  | bioinformatic                    |
| MS3_10736 | calponin-related protein                                                    | No  | proteomic (T, AES)               |
| MS3_10753 | putative triosephosphate isomerase                                          | No  | proteomic (T, AES, EES, SEA, EV) |
| MS3_10772 | Glycoside hydrolase subgroup catalytic core                                 | No  | proteomic (EV)                   |
| MS3_10785 | 4-hydroxybutyrate coenzyme A transferase                                    | No  | proteomic (T, SEA)               |
| MS3_10803 | putative phospholipid-transporting ATPase IIB                               | No  | proteomic (T)                    |
| MS3_10811 | Proteinase inhibitor I32, inhibitor of apoptosis, domain-containing protein | No  | bioinformatic                    |
| MS3_10816 | glutamate dehydrogenase, putative                                           | No  | proteomic (T, EES, SEA)          |
| MS3_10820 | cercarial elastase (S01 family)                                             | Yes | bioinformatic                    |
| MS3_10847 | Histone H2B                                                                 | No  | proteomic (EES, EV)              |
| MS3_10898 | putative ubx domain containing protein                                      | No  | proteomic (EES)                  |
| MS3_10900 | putative adenosine kinase                                                   | No  | bioinformatic                    |
| MS3_10931 | serpin, putative                                                            | No  | proteomic (T, AES, EV)           |
| MS3_10935 | SJCHGC06112 protein                                                         | No  | bioinformatic                    |
| MS3_10943 | ubiquitin-conjugating enzyme E2 F                                           | No  | bioinformatic                    |
| MS3_10956 | putative neuroendocrine protein 7b2                                         | Yes | bioinformatic                    |
| MS3_10998 | nucleoside-diphosphate kinase                                               | No  | proteomic (T, AES, SEA)          |
| MS3_11045 | putative heterogeneous nuclear ribonucleoprotein k                          | No  | bioinformatic                    |
| MS3_11059 | putative heat shock protein                                                 | No  | proteomic (T, AES, EES, EV)      |
| MS3_11074 | small subunit ribosomal protein S27                                         | No  | bioinformatic                    |
| MS3_11076 | sugar nucleotide epimerase related                                          | No  | bioinformatic                    |
| MS3_11077 | SJCHGC02796 protein                                                         | No  | bioinformatic                    |
| MS3_11103 | Four and a half LIM domains protein 2                                       | No  | bioinformatic                    |
| MS3_11139 | Ras-related C3 botulinum toxin substrate 1                                  | No  | proteomic (T, EV)                |
| MS3_11161 | putative glutaredoxin, grx                                                  | No  | bioinformatic                    |
| MS3_11226 | Major vault protein                                                         | No  | proteomic (AES, SEA, EV)         |
| MS3_11239 | putative plasminogen activator inhibitor 1 RNA-binding protein              | No  | bioinformatic                    |
| MS3_11247 | Lysine--tRNA ligase                                                         | No  | bioinformatic                    |
| MS3_11250 | Heterogeneous nuclear ribonucleoproteins A2/B1 isoform 1                    | No  | proteomic (EES)                  |
| MS3_11273 | Aquaporin-9 (AQP-9) (Small solute channel 1)                                | No  | proteomic (T)                    |
| MS3_11280 | putative alpha-galactosidase/alpha-n-acetylgalactosaminidase                | No  | proteomic (AES, EV)              |

|           |                                                                 |    |                                  |
|-----------|-----------------------------------------------------------------|----|----------------------------------|
| MS3_11293 | heat shock 70kDa protein 1/2/6/8                                | No | proteomic (T, AES, EES, SEA, EV) |
| MS3_11376 | Clathrin heavy chain 1 isoform 3                                | No | bioinformatic                    |
| MS3_11411 | putative heat shock protein 70                                  | No | proteomic (T, AES, EES, SEA, EV) |
| MS3_11428 | Major egg antigen                                               | No | proteomic (T)                    |
| MS3_11429 | large subunit ribosomal protein L7e                             | No | bioinformatic                    |
| MS3_11432 | Actin alpha cardiac muscle 1                                    | No | proteomic (AES, EES)             |
| MS3_11484 | neuroblast differentiation-associated AHNAK-like                | No | proteomic (AES, EES, SEA)        |
| MS3_11509 | putative 60s ribosomal protein L12                              | No | bioinformatic                    |
| MS3_11526 | putative programmed cell death                                  | No | proteomic (EES)                  |
| MS3_11537 | SJCHGC07871 protein                                             | No | proteomic (T, AES)               |
| MS3_11544 | glutathione S-transferase 26 kDa                                | No | proteomic (AES)                  |
| No hits   | tetraspanin family isoform 2                                    | No | bioinformatic                    |
| No hits   | NF-YA subunit                                                   | No | bioinformatic                    |
| No hits   | pre-mRNA processing protein prp39-related protein               | No | bioinformatic                    |
| No hits   | Uncharacterised protein                                         | No | bioinformatic                    |
| No hits   | fascin, putative                                                | No | proteomic (AES)                  |
| No hits   | putative SAM pointed domain containing ets transcription factor | No | bioinformatic                    |
| No hits   | ribosomal protein L18                                           | No | bioinformatic                    |

\*WormBase ParaSite online database, version 14 [https://parasite.wormbase.org/Schistosoma\\_haematobium\\_prjna78265/Info/Index/](https://parasite.wormbase.org/Schistosoma_haematobium_prjna78265/Info/Index/)

# antigen sequences were interrogated for the predicted presence of a signal peptide (<http://www.cbs.dtu.dk/services/SignalP-4.1/>) and the SP (if any) was not included in gene synthesis

^proteins for array inclusion selected from bioinformatic analysis of second-generation *S. mansoni* array or proteomic analysis of *S. haematobium* T, ES, EES, SEA or EV.

T = adult tegument, AES = adult excretory/secretory products, EES = egg excretory/secretory products, SEA = soluble egg antigen, EV = adult extracellular vesicles.



**Table S2. Fold change of IgG responses between infected and non-infected (*S. haematobium*-endemic) populations resulting from serum sample probing of *S. haematobium* protein arrays.**

| Antigen<br>(WBPS14*<br>accession) | P value    | FDR        | AUC  | AUC<br>Lower<br>CI | AUC<br>Upper<br>CI | Mean<br>infected | Mean<br>non<br>infected | Fold<br>Change | Positive<br>infected | Positive<br>non<br>infected | Positive<br>infected<br>(%) | Positive<br>non<br>infected<br>(%) |
|-----------------------------------|------------|------------|------|--------------------|--------------------|------------------|-------------------------|----------------|----------------------|-----------------------------|-----------------------------|------------------------------------|
| MS3_10186                         | 3.20E-22   | 2.50E-20   | 0.88 | 0.83               | 0.92               | 12.79            | 10.11                   | 14.58509332    | 232                  | 14                          | 95.47325103                 | 48.27586207                        |
| MS3_10385                         | 3.20E-20   | 1.60E-17   | 0.88 | 0.83               | 0.92               | 12.08            | 8.22                    | 47.46535481    | 197                  | 1                           | 81.06995885                 | 3.448275862                        |
| MS3_02553                         | 1.10E-17   | 3.80E-15   | 0.88 | 0.82               | 0.94               | 12.01            | 9.16                    | 17.28778203    | 187                  | 3                           | 76.95473251                 | 10.34482759                        |
| MS3_09207                         | 4.20E-17   | 1.00E-14   | 0.78 | 0.71               | 0.84               | 8.84             | 7.17                    | 5.31217083     | 74                   | 0                           | 30.4526749                  | 0                                  |
| MS3_09198                         | 2.90E-16   | 5.80E-14   | 0.79 | 0.73               | 0.85               | 11.95            | 10.38                   | 4.806648198    | 233                  | 24                          | 95.88477366                 | 82.75862069                        |
| MS3_07972                         | 7.10E-16   | 1.20E-13   | 0.86 | 0.8                | 0.92               | 9.98             | 7.39                    | 13.32977666    | 136                  | 1                           | 55.96707819                 | 3.448275862                        |
| MS3_01370                         | 3.10E-15   | 3.80E-13   | 0.78 | 0.71               | 0.84               | 9.06             | 7.55                    | 4.526731986    | 79                   | 0                           | 32.51028807                 | 0                                  |
| MS3_07231                         | 3.10E-15   | 3.80E-13   | 0.79 | 0.73               | 0.86               | 8.53             | 9.61                    | 0.339595514    | 29                   | 7                           | 11.93415638                 | 24.13793103                        |
| MS3_05530                         | 8.10E-14   | 9.00E-12   | 0.81 | 0.75               | 0.88               | 8.74             | 9.64                    | 0.406569651    | 20                   | 8                           | 8.230452675                 | 27.5862069                         |
| MS3_05950                         | 1.00E-13   | 1.00E-11   | 0.76 | 0.7                | 0.82               | 10.96            | 9.53                    | 4.178699213    | 169                  | 4                           | 69.5473251                  | 13.79310345                        |
| MS3_04157                         | 2.60E-13   | 2.40E-11   | 0.8  | 0.73               | 0.87               | 8.01             | 9.25                    | 0.289384189    | 10                   | 3                           | 4.115226337                 | 10.34482759                        |
| MS3_06828                         | 1.30E-12   | 1.00E-10   | 0.84 | 0.77               | 0.91               | 8.19             | 6.54                    | 5.206990291    | 28                   | 0                           | 11.52263374                 | 0                                  |
| MS3_01658                         | 5.50E-11   | 4.20E-09   | 0.83 | 0.76               | 0.9                | 7.72             | 6.46                    | 3.525429425    | 10                   | 0                           | 4.115226337                 | 0                                  |
| MS3_06368                         | 6.90E-11   | 4.70E-09   | 0.86 | 0.78               | 0.93               | 7.91             | 6.44                    | 4.349245639    | 13                   | 0                           | 5.349794239                 | 0                                  |
| MS3_08399                         | 7.10E-11   | 4.70E-09   | 0.76 | 0.69               | 0.83               | 8.7              | 9.64                    | 0.390627826    | 37                   | 9                           | 15.22633745                 | 31.03448276                        |
| MS3_07892                         | 1.50E-10   | 9.50E-09   | 0.78 | 0.7                | 0.85               | 7.59             | 6.65                    | 2.559985051    | 4                    | 0                           | 1.646090535                 | 0                                  |
| MS3_00779                         | 4.40E-10   | 0.00000026 | 0.78 | 0.71               | 0.85               | 8.67             | 9.46                    | 0.453844785    | 18                   | 5                           | 7.407407407                 | 17.24137931                        |
| MS3_01466                         | 6.40E-10   | 0.00000035 | 0.69 | 0.62               | 0.75               | 10.9             | 9.59                    | 3.706173728    | 161                  | 8                           | 66.25514403                 | 27.5862069                         |
| MS3_00180                         | 8.40E-10   | 0.00000044 | 0.77 | 0.69               | 0.85               | 9.33             | 7.96                    | 3.935351144    | 74                   | 0                           | 30.4526749                  | 0                                  |
| MS3_08105                         | 1.10E-09   | 0.00000057 | 0.76 | 0.69               | 0.84               | 8.72             | 9.65                    | 0.394553701    | 35                   | 8                           | 14.40329218                 | 27.5862069                         |
| MS3_06193                         | 1.80E-09   | 0.00000085 | 0.71 | 0.64               | 0.79               | 10.72            | 8.57                    | 8.584858702    | 129                  | 2                           | 53.08641975                 | 6.896551724                        |
| MS3_09175                         | 3.40E-09   | 0.00000015 | 0.75 | 0.67               | 0.82               | 7.89             | 7.1                     | 2.203397617    | 10                   | 0                           | 4.115226337                 | 0                                  |
| MS3_09286                         | 5.70E-09   | 0.00000025 | 0.71 | 0.63               | 0.8                | 8.9              | 9.75                    | 0.427414925    | 51                   | 10                          | 20.98765432                 | 34.48275862                        |
| MS3_08937                         | 0.00000006 | 0.00000025 | 0.68 | 0.61               | 0.76               | 9.08             | 9.71                    | 0.532591796    | 54                   | 8                           | 22.22222222                 | 27.5862069                         |
| MS3_09779                         | 7.60E-09   | 0.0000003  | 0.84 | 0.76               | 0.93               | 9.05             | 6.87                    | 8.846315677    | 80                   | 2                           | 32.9218107                  | 6.896551724                        |
| MS3_09903                         | 8.50E-09   | 0.00000033 | 0.72 | 0.64               | 0.8                | 8.54             | 9.33                    | 0.453844782    | 12                   | 3                           | 4.938271605                 | 10.34482759                        |
| MS3_09828                         | 0.00000009 | 0.00000033 | 0.76 | 0.68               | 0.84               | 8.37             | 7.21                    | 3.189934848    | 33                   | 0                           | 13.58024691                 | 0                                  |
| MS3_10252                         | 0.00000012 | 0.00000043 | 0.77 | 0.69               | 0.85               | 9.03             | 7.92                    | 3.034358752    | 51                   | 0                           | 20.98765432                 | 0                                  |
| MS3_04774                         | 0.00000013 | 0.00000044 | 0.75 | 0.67               | 0.83               | 7.88             | 7.03                    | 2.339648349    | 6                    | 0                           | 2.469135802                 | 0                                  |
| MS3_03127                         | 0.00000022 | 0.00000072 | 0.84 | 0.75               | 0.93               | 8.24             | 6.99                    | 3.490345675    | 15                   | 0                           | 6.172839506                 | 0                                  |
| MS3_09780                         | 0.00000026 | 0.00000083 | 0.73 | 0.65               | 0.81               | 9                | 9.77                    | 0.463013063    | 46                   | 11                          | 18.93004115                 | 37.93103448                        |

|           |            |           |      |      |      |       |      |             |     |    |             |             |
|-----------|------------|-----------|------|------|------|-------|------|-------------|-----|----|-------------|-------------|
| MS3_08826 | 0.00000033 | 0.000001  | 0.74 | 0.66 | 0.81 | 8.09  | 7.24 | 2.339647836 | 10  | 0  | 4.115226337 | 0           |
| MS3_08087 | 0.00000039 | 0.0000012 | 0.81 | 0.72 | 0.89 | 8.7   | 7.43 | 3.560853717 | 29  | 0  | 11.93415638 | 0           |
| MS3_06532 | 0.00000049 | 0.0000014 | 0.76 | 0.68 | 0.84 | 10.19 | 9.05 | 3.126768404 | 127 | 4  | 52.26337449 | 13.79310345 |
| MS3_05600 | 0.00000086 | 0.0000024 | 0.81 | 0.72 | 0.9  | 7.46  | 6.55 | 2.484326791 | 4   | 0  | 1.646090535 | 0           |
| MS3_01478 | 0.00000011 | 0.0000028 | 0.69 | 0.61 | 0.76 | 9.02  | 9.54 | 0.594520542 | 37  | 4  | 15.22633745 | 13.79310345 |
| MS3_02001 | 0.00000011 | 0.0000028 | 0.7  | 0.62 | 0.77 | 9.22  | 9.94 | 0.486752252 | 77  | 12 | 31.6872428  | 41.37931034 |
| MS3_08530 | 0.00000011 | 0.0000028 | 0.71 | 0.63 | 0.79 | 8.88  | 9.63 | 0.472366546 | 46  | 7  | 18.93004115 | 24.13793103 |
| MS3_09632 | 0.00000012 | 0.000003  | 0.68 | 0.59 | 0.77 | 7.41  | 6.6  | 2.247911323 | 18  | 0  | 7.407407407 | 0           |
| MS3_09638 | 0.00000012 | 0.000003  | 0.76 | 0.68 | 0.84 | 7.88  | 7.02 | 2.363162244 | 4   | 0  | 1.646090535 | 0           |
| MS3_00886 | 0.00000016 | 0.0000038 | 0.77 | 0.69 | 0.84 | 9.29  | 8.17 | 3.064854423 | 71  | 1  | 29.218107   | 3.448275862 |
| MS3_04920 | 0.00000019 | 0.0000044 | 0.76 | 0.68 | 0.84 | 8.4   | 7.27 | 3.095657844 | 27  | 1  | 11.11111111 | 3.448275862 |
| MS3_08925 | 0.00000021 | 0.0000048 | 0.68 | 0.6  | 0.76 | 8.98  | 9.62 | 0.527292418 | 45  | 9  | 18.51851852 | 31.03448276 |
| MS3_03662 | 0.00000022 | 0.0000049 | 0.77 | 0.69 | 0.86 | 8.23  | 7.37 | 2.363161463 | 13  | 0  | 5.349794239 | 0           |
| MS3_06798 | 0.00000022 | 0.0000049 | 0.76 | 0.67 | 0.85 | 7.29  | 6.56 | 2.075083802 | 6   | 0  | 2.469135802 | 0           |
| MS3_08903 | 0.0000003  | 0.0000064 | 0.67 | 0.59 | 0.75 | 7.16  | 6.48 | 1.973881184 | 8   | 0  | 3.29218107  | 0           |
| MS3_01095 | 0.00000033 | 0.000007  | 0.78 | 0.69 | 0.86 | 8.85  | 7.65 | 3.320117607 | 40  | 0  | 16.46090535 | 0           |
| MS3_01422 | 0.00000038 | 0.0000078 | 0.69 | 0.59 | 0.78 | 7.65  | 6.56 | 2.974279361 | 32  | 0  | 13.16872428 | 0           |
| MS3_07406 | 0.00000041 | 0.0000083 | 0.64 | 0.56 | 0.72 | 7.23  | 6.59 | 1.896483464 | 7   | 0  | 2.880658436 | 0           |
| MS3_02709 | 0.0000005  | 0.0000099 | 0.71 | 0.63 | 0.79 | 7.84  | 7.2  | 1.896481642 | 3   | 0  | 1.234567901 | 0           |
| MS3_04617 | 0.00000053 | 0.00001   | 0.75 | 0.65 | 0.84 | 7.05  | 6.33 | 2.054438189 | 8   | 0  | 3.29218107  | 0           |
| MS3_04267 | 0.00000054 | 0.00001   | 0.67 | 0.59 | 0.75 | 8.95  | 9.56 | 0.543350863 | 37  | 5  | 15.22633745 | 17.24137931 |
| MS3_08094 | 0.0000006  | 0.000011  | 0.69 | 0.61 | 0.78 | 7.63  | 6.57 | 2.88637598  | 33  | 0  | 13.58024691 | 0           |
| MS3_01899 | 0.00000063 | 0.000012  | 0.78 | 0.69 | 0.87 | 8.86  | 7.65 | 3.353485345 | 57  | 1  | 23.45679012 | 3.448275862 |
| MS3_02802 | 0.00000065 | 0.000012  | 0.72 | 0.63 | 0.8  | 6.99  | 6.39 | 1.822122387 | 3   | 0  | 1.234567901 | 0           |
| MS3_10956 | 0.00000067 | 0.000012  | 0.66 | 0.57 | 0.75 | 9.29  | 9.82 | 0.588604966 | 72  | 11 | 29.62962963 | 37.93103448 |
| MS3_07390 | 0.00000068 | 0.000012  | 0.75 | 0.67 | 0.83 | 7.83  | 6.89 | 2.559983666 | 11  | 0  | 4.526748971 | 0           |
| MS3_07411 | 0.00000086 | 0.000015  | 0.75 | 0.67 | 0.84 | 7.75  | 6.9  | 2.339648794 | 3   | 0  | 1.234567901 | 0           |
| MS3_10288 | 0.00000095 | 0.000016  | 0.72 | 0.64 | 0.81 | 8.67  | 9.34 | 0.511708567 | 20  | 6  | 8.230452675 | 20.68965517 |
| MS3_00004 | 0.00000097 | 0.000016  | 0.8  | 0.7  | 0.9  | 8.59  | 7.84 | 2.117000271 | 6   | 0  | 2.469135802 | 0           |
| MS3_04526 | 0.0000013  | 0.000021  | 0.61 | 0.53 | 0.69 | 9.13  | 9.63 | 0.606530655 | 59  | 6  | 24.27983539 | 20.68965517 |
| MS3_03424 | 0.0000017  | 0.000026  | 0.7  | 0.61 | 0.79 | 9.03  | 8.15 | 2.410899873 | 45  | 0  | 18.51851852 | 0           |
| MS3_11103 | 0.0000019  | 0.00003   | 0.67 | 0.59 | 0.75 | 8.99  | 9.47 | 0.618783386 | 22  | 3  | 9.053497942 | 10.34482759 |
| MS3_07045 | 0.000002   | 0.00003   | 0.72 | 0.63 | 0.82 | 8.6   | 7.6  | 2.718282417 | 37  | 0  | 15.22633745 | 0           |
| MS3_11537 | 0.0000021  | 0.000031  | 0.73 | 0.65 | 0.81 | 8.82  | 9.42 | 0.548811628 | 21  | 6  | 8.641975309 | 20.68965517 |
| MS3_04981 | 0.0000021  | 0.000031  | 0.71 | 0.63 | 0.8  | 8.98  | 9.57 | 0.554327279 | 26  | 7  | 10.69958848 | 24.13793103 |
| MS3_03789 | 0.0000026  | 0.000039  | 0.63 | 0.54 | 0.71 | 7.68  | 6.86 | 2.270501851 | 32  | 0  | 13.16872428 | 0           |
| MS3_04932 | 0.0000028  | 0.000041  | 0.69 | 0.61 | 0.78 | 8.91  | 9.54 | 0.532591794 | 36  | 8  | 14.81481481 | 27.5862069  |

|           |          |          |      |      |      |      |      |             |     |    |             |             |
|-----------|----------|----------|------|------|------|------|------|-------------|-----|----|-------------|-------------|
| MS3_02674 | 0.000035 | 0.000051 | 0.73 | 0.64 | 0.81 | 8.36 | 7.45 | 2.484323237 | 35  | 1  | 14.40329218 | 3.448275862 |
| MS3_10141 | 0.000036 | 0.000052 | 0.72 | 0.63 | 0.81 | 7.91 | 7.2  | 2.033992118 | 10  | 0  | 4.115226337 | 0           |
| MS3_08008 | 0.000039 | 0.000054 | 0.65 | 0.57 | 0.74 | 9.35 | 9.84 | 0.612626391 | 78  | 12 | 32.09876543 | 41.37931034 |
| MS3_02407 | 0.000046 | 0.000064 | 0.67 | 0.59 | 0.76 | 8.52 | 9.26 | 0.477113901 | 15  | 1  | 6.172839506 | 3.448275862 |
| MS3_03096 | 0.000005 | 0.000068 | 0.67 | 0.58 | 0.75 | 9.17 | 9.79 | 0.537944433 | 66  | 10 | 27.16049383 | 34.48275862 |
| MS3_07994 | 0.000057 | 0.000077 | 0.69 | 0.61 | 0.77 | 9.12 | 9.73 | 0.543350864 | 60  | 10 | 24.69135802 | 34.48275862 |
| MS3_06167 | 0.000093 | 0.00012  | 0.74 | 0.65 | 0.82 | 7.66 | 8.77 | 0.329558896 | 16  | 3  | 6.58436214  | 10.34482759 |
| MS3_10816 | 0.000012 | 0.00015  | 0.68 | 0.59 | 0.76 | 9.4  | 9.89 | 0.612626392 | 81  | 10 | 33.33333333 | 34.48275862 |
| MS3_11432 | 0.000012 | 0.00015  | 0.69 | 0.6  | 0.79 | 8.86 | 9.54 | 0.506616985 | 36  | 9  | 14.81481481 | 31.03448276 |
| MS3_05837 | 0.000013 | 0.00016  | 0.7  | 0.62 | 0.78 | 8.97 | 9.46 | 0.612626388 | 29  | 4  | 11.93415638 | 13.79310345 |
| MS3_09073 | 0.000013 | 0.00016  | 0.69 | 0.6  | 0.77 | 7.42 | 6.84 | 1.786039835 | 1   | 0  | 0.411522634 | 0           |
| MS3_06608 | 0.000014 | 0.00017  | 0.75 | 0.66 | 0.85 | 8.53 | 7.39 | 3.126769435 | 21  | 0  | 8.641975309 | 0           |
| MS3_09970 | 0.000015 | 0.00018  | 0.77 | 0.67 | 0.87 | 8.66 | 7.37 | 3.632787888 | 50  | 2  | 20.57613169 | 6.896551724 |
| MS3_01016 | 0.000016 | 0.00019  | 0.71 | 0.62 | 0.79 | 8.52 | 9.27 | 0.472366538 | 28  | 3  | 11.52263374 | 10.34482759 |
| MS3_06719 | 0.000016 | 0.00019  | 0.78 | 0.67 | 0.89 | 8.59 | 7.62 | 2.637945003 | 15  | 1  | 6.172839506 | 3.448275862 |
| MS3_01337 | 0.000017 | 0.00019  | 0.75 | 0.67 | 0.84 | 8.83 | 7.77 | 2.886371442 | 27  | 0  | 11.11111111 | 0           |
| MS3_07612 | 0.000017 | 0.00019  | 0.74 | 0.64 | 0.83 | 8.61 | 9.28 | 0.511708565 | 13  | 4  | 5.349794239 | 13.79310345 |
| MS3_08808 | 0.000018 | 0.0002   | 0.67 | 0.58 | 0.76 | 8.75 | 9.4  | 0.522045767 | 30  | 7  | 12.34567901 | 24.13793103 |
| MS3_01425 | 0.000022 | 0.00025  | 0.78 | 0.67 | 0.88 | 8.19 | 6.89 | 3.669300187 | 24  | 1  | 9.87654321  | 3.448275862 |
| MS3_09692 | 0.000023 | 0.00026  | 0.73 | 0.63 | 0.83 | 7.46 | 6.83 | 1.877612151 | 2   | 0  | 0.823045267 | 0           |
| MS3_05718 | 0.000029 | 0.00032  | 0.65 | 0.57 | 0.74 | 8.81 | 9.37 | 0.571209055 | 23  | 3  | 9.465020576 | 10.34482759 |
| MS3_11411 | 0.00003  | 0.00033  | 0.74 | 0.67 | 0.81 | 9.95 | 8.93 | 2.773194806 | 124 | 1  | 51.02880658 | 3.448275862 |
| MS3_04499 | 0.000031 | 0.00033  | 0.69 | 0.61 | 0.77 | 7.94 | 8.67 | 0.481908943 | 10  | 1  | 4.115226337 | 3.448275862 |
| MS3_05170 | 0.000031 | 0.00033  | 0.68 | 0.59 | 0.77 | 9.24 | 9.79 | 0.576949807 | 68  | 11 | 27.98353909 | 37.93103448 |
| MS3_04193 | 0.000032 | 0.00034  | 0.7  | 0.61 | 0.79 | 8.91 | 9.38 | 0.625002261 | 16  | 4  | 6.58436214  | 13.79310345 |
| MS3_05000 | 0.000034 | 0.00036  | 0.69 | 0.59 | 0.79 | 7.26 | 6.69 | 1.768268911 | 6   | 0  | 2.469135802 | 0           |
| MS3_04225 | 0.000039 | 0.0004   | 0.61 | 0.53 | 0.69 | 8.81 | 9.32 | 0.60049557  | 29  | 3  | 11.93415638 | 10.34482759 |
| MS3_05034 | 0.00004  | 0.00041  | 0.66 | 0.57 | 0.75 | 9.15 | 9.72 | 0.565525434 | 60  | 10 | 24.69135802 | 34.48275862 |
| MS3_05213 | 0.000041 | 0.00041  | 0.69 | 0.61 | 0.78 | 8.34 | 9.29 | 0.386741005 | 34  | 4  | 13.99176955 | 13.79310345 |
| MS3_10305 | 0.000041 | 0.00041  | 0.71 | 0.62 | 0.8  | 8.65 | 9.15 | 0.606530648 | 6   | 0  | 2.469135802 | 0           |
| MS3_07304 | 0.000043 | 0.00042  | 0.73 | 0.64 | 0.82 | 8.57 | 7.9  | 1.954237519 | 10  | 0  | 4.115226337 | 0           |
| MS3_02999 | 0.000044 | 0.00043  | 0.61 | 0.53 | 0.7  | 8.94 | 9.42 | 0.618783385 | 39  | 4  | 16.04938272 | 13.79310345 |
| MS3_06732 | 0.000045 | 0.00044  | 0.67 | 0.58 | 0.75 | 8.9  | 9.44 | 0.582748245 | 35  | 6  | 14.40329218 | 20.68965517 |
| MS3_07823 | 0.000046 | 0.00044  | 0.72 | 0.62 | 0.82 | 8.52 | 7.67 | 2.339647268 | 29  | 1  | 11.93415638 | 3.448275862 |
| MS3_05011 | 0.000048 | 0.00045  | 0.65 | 0.55 | 0.74 | 9.01 | 9.55 | 0.582748247 | 41  | 7  | 16.87242798 | 24.13793103 |
| MS3_08954 | 0.000053 | 0.0005   | 0.71 | 0.63 | 0.8  | 7.99 | 8.68 | 0.501576026 | 4   | 1  | 1.646090535 | 3.448275862 |
| MS3_07685 | 0.000055 | 0.00051  | 0.68 | 0.58 | 0.77 | 8.66 | 9.31 | 0.522045765 | 20  | 6  | 8.230452675 | 20.68965517 |

|           |          |         |      |      |      |       |       |             |     |    |             |             |
|-----------|----------|---------|------|------|------|-------|-------|-------------|-----|----|-------------|-------------|
| MS3_09958 | 0.000057 | 0.00053 | 0.65 | 0.57 | 0.73 | 8.93  | 9.43  | 0.606530653 | 43  | 3  | 17.69547325 | 10.34482759 |
| MS3_03295 | 0.000062 | 0.00057 | 0.66 | 0.57 | 0.75 | 9.39  | 9.95  | 0.571209061 | 98  | 16 | 40.32921811 | 55.17241379 |
| MS3_09276 | 0.000069 | 0.00061 | 0.68 | 0.59 | 0.77 | 8.61  | 9.09  | 0.618783379 | 8   | 1  | 3.29218107  | 3.448275862 |
| MS3_07757 | 0.000069 | 0.00061 | 0.68 | 0.59 | 0.77 | 7.96  | 7.44  | 1.682028025 | 7   | 0  | 2.880658436 | 0           |
| MS3_09521 | 0.000069 | 0.00061 | 0.75 | 0.65 | 0.86 | 8.45  | 7.62  | 2.293319187 | 24  | 1  | 9.87654321  | 3.448275862 |
| MS3_10421 | 0.000069 | 0.00061 | 0.69 | 0.6  | 0.77 | 9     | 9.39  | 0.677056869 | 17  | 2  | 6.995884774 | 6.896551724 |
| MS3_07763 | 0.000071 | 0.00062 | 0.69 | 0.6  | 0.78 | 8.05  | 7.43  | 1.858928507 | 6   | 0  | 2.469135802 | 0           |
| MS3_04767 | 0.000073 | 0.00063 | 0.69 | 0.61 | 0.78 | 8.79  | 9.2   | 0.663650242 | 8   | 1  | 3.29218107  | 3.448275862 |
| MS3_06125 | 0.00008  | 0.00069 | 0.71 | 0.61 | 0.8  | 8.85  | 7.86  | 2.691234818 | 59  | 2  | 24.27983539 | 6.896551724 |
| MS3_05677 | 0.000085 | 0.00073 | 0.66 | 0.57 | 0.74 | 8.79  | 9.44  | 0.522045768 | 30  | 4  | 12.34567901 | 13.79310345 |
| MS3_03301 | 0.000089 | 0.00075 | 0.64 | 0.56 | 0.73 | 8.98  | 9.51  | 0.588604964 | 46  | 5  | 18.93004115 | 17.24137931 |
| MS3_09700 | 0.000089 | 0.00075 | 0.66 | 0.58 | 0.75 | 7.99  | 7.42  | 1.768267483 | 12  | 0  | 4.938271605 | 0           |
| MS3_07178 | 0.000096 | 0.0008  | 0.75 | 0.64 | 0.85 | 8.44  | 6.9   | 4.664594791 | 65  | 2  | 26.74897119 | 6.896551724 |
| MS3_09826 | 0.000099 | 0.00082 | 0.7  | 0.61 | 0.8  | 8.62  | 9.2   | 0.559898354 | 12  | 4  | 4.938271605 | 13.79310345 |
| MS3_05595 | 0.0001   | 0.00082 | 0.7  | 0.61 | 0.79 | 7.28  | 6.75  | 1.698933831 | 1   | 0  | 0.411522634 | 0           |
| MS3_10485 | 0.0001   | 0.00083 | 0.67 | 0.58 | 0.76 | 8.54  | 7.71  | 2.293319114 | 31  | 0  | 12.75720165 | 0           |
| MS3_08723 | 0.00011  | 0.0009  | 0.72 | 0.62 | 0.82 | 8.27  | 7.35  | 2.509291262 | 27  | 1  | 11.11111111 | 3.448275862 |
| MS3_09253 | 0.00011  | 0.00088 | 0.61 | 0.52 | 0.7  | 6.75  | 6.2   | 1.73325778  | 6   | 0  | 2.469135802 | 0           |
| MS3_04279 | 0.00012  | 0.00093 | 0.61 | 0.53 | 0.7  | 8.12  | 7.47  | 1.915541282 | 30  | 0  | 12.34567901 | 0           |
| MS3_05040 | 0.00012  | 0.00096 | 0.73 | 0.63 | 0.84 | 8.96  | 8.05  | 2.484322745 | 46  | 2  | 18.93004115 | 6.896551724 |
| MS3_06009 | 0.00012  | 0.00092 | 0.72 | 0.63 | 0.81 | 8.22  | 7.14  | 2.944681188 | 47  | 1  | 19.34156379 | 3.448275862 |
| MS3_08498 | 0.00012  | 0.00096 | 0.76 | 0.65 | 0.88 | 8.84  | 7.99  | 2.339647071 | 35  | 4  | 14.40329218 | 13.79310345 |
| MS3_10772 | 0.00012  | 0.00093 | 0.74 | 0.64 | 0.85 | 7.65  | 6.98  | 1.954238569 | 4   | 0  | 1.646090535 | 0           |
| MS3_02428 | 0.00013  | 0.00098 | 0.69 | 0.6  | 0.77 | 8.6   | 9.11  | 0.600495566 | 12  | 4  | 4.938271605 | 13.79310345 |
| MS3_05391 | 0.00013  | 0.00098 | 0.71 | 0.62 | 0.8  | 8.24  | 7.7   | 1.716007095 | 2   | 0  | 0.823045267 | 0           |
| MS3_07465 | 0.00013  | 0.00096 | 0.73 | 0.63 | 0.84 | 8.79  | 7.93  | 2.363160945 | 42  | 2  | 17.28395062 | 6.896551724 |
| No hits   | 0.00013  | 0.00098 | 0.74 | 0.64 | 0.84 | 7.75  | 6.97  | 2.181473787 | 8   | 1  | 3.29218107  | 3.448275862 |
| MS3_10002 | 0.00014  | 0.001   | 0.62 | 0.53 | 0.7  | 8.98  | 9.46  | 0.618783386 | 43  | 3  | 17.69547325 | 10.34482759 |
| MS3_10184 | 0.00014  | 0.0011  | 0.66 | 0.57 | 0.76 | 7.99  | 7.3   | 1.993716214 | 21  | 0  | 8.641975309 | 0           |
| MS3_03509 | 0.00015  | 0.0011  | 0.72 | 0.62 | 0.82 | 11.29 | 10.18 | 3.034358398 | 211 | 15 | 86.83127572 | 51.72413793 |
| MS3_00880 | 0.00017  | 0.0012  | 0.66 | 0.57 | 0.76 | 8.53  | 9.13  | 0.548811621 | 16  | 3  | 6.58436214  | 10.34482759 |
| MS3_03419 | 0.00017  | 0.0012  | 0.64 | 0.55 | 0.73 | 9.51  | 9.93  | 0.657046818 | 90  | 14 | 37.03703704 | 48.27586207 |
| MS3_10138 | 0.00017  | 0.0012  | 0.72 | 0.62 | 0.82 | 10.04 | 8.97  | 2.915379542 | 121 | 5  | 49.79423868 | 17.24137931 |
| MS3_01262 | 0.00018  | 0.0012  | 0.71 | 0.62 | 0.8  | 8.89  | 8.18  | 2.03399138  | 44  | 1  | 18.10699588 | 3.448275862 |
| MS3_06539 | 0.00018  | 0.0012  | 0.68 | 0.58 | 0.78 | 7     | 6.4   | 1.822122316 | 6   | 0  | 2.469135802 | 0           |
| MS3_06680 | 0.00018  | 0.0012  | 0.77 | 0.68 | 0.87 | 6.74  | 6.14  | 1.822124713 | 1   | 0  | 0.411522634 | 0           |
| MS3_07363 | 0.00018  | 0.0013  | 0.64 | 0.55 | 0.73 | 8.54  | 9.09  | 0.576949796 | 18  | 1  | 7.407407407 | 3.448275862 |

|           |         |        |      |      |      |       |       |             |     |    |             |             |
|-----------|---------|--------|------|------|------|-------|-------|-------------|-----|----|-------------|-------------|
| MS3_04449 | 0.00021 | 0.0015 | 0.6  | 0.51 | 0.7  | 9.52  | 9.94  | 0.657046818 | 112 | 14 | 46.09053498 | 48.27586207 |
| MS3_10345 | 0.00021 | 0.0015 | 0.57 | 0.49 | 0.66 | 9.58  | 9.94  | 0.697676324 | 123 | 14 | 50.61728395 | 48.27586207 |
| MS3_00223 | 0.00024 | 0.0017 | 0.63 | 0.54 | 0.73 | 8.84  | 9.35  | 0.600495571 | 22  | 4  | 9.053497942 | 13.79310345 |
| MS3_00996 | 0.00025 | 0.0017 | 0.64 | 0.56 | 0.73 | 10.34 | 9.78  | 1.750672504 | 130 | 8  | 53.49794239 | 27.5862069  |
| MS3_01153 | 0.00025 | 0.0017 | 0.67 | 0.58 | 0.76 | 8.24  | 7.51  | 2.075081085 | 22  | 0  | 9.053497942 | 0           |
| MS3_05639 | 0.00026 | 0.0017 | 0.69 | 0.59 | 0.79 | 8.58  | 9     | 0.657046807 | 3   | 1  | 1.234567901 | 3.448275862 |
| MS3_08019 | 0.00026 | 0.0017 | 0.62 | 0.54 | 0.71 | 9.42  | 9.8   | 0.683861407 | 85  | 11 | 34.97942387 | 37.93103448 |
| MS3_08161 | 0.00026 | 0.0017 | 0.66 | 0.57 | 0.75 | 8.89  | 9.45  | 0.571209057 | 38  | 6  | 15.63786008 | 20.68965517 |
| MS3_10820 | 0.00028 | 0.0018 | 0.66 | 0.56 | 0.75 | 7.27  | 6.77  | 1.648722643 | 4   | 0  | 1.646090535 | 0           |
| MS3_02343 | 0.00029 | 0.0019 | 0.68 | 0.59 | 0.78 | 8.06  | 7.51  | 1.733253365 | 8   | 0  | 3.29218107  | 0           |
| MS3_03047 | 0.00029 | 0.0019 | 0.64 | 0.56 | 0.73 | 9.02  | 9.52  | 0.606530654 | 46  | 6  | 18.93004115 | 20.68965517 |
| MS3_05586 | 0.00029 | 0.0019 | 0.68 | 0.59 | 0.77 | 8.39  | 7.84  | 1.733253197 | 15  | 0  | 6.172839506 | 0           |
| MS3_03453 | 0.0003  | 0.0019 | 0.74 | 0.63 | 0.85 | 8.47  | 7.6   | 2.386911346 | 24  | 3  | 9.87654321  | 10.34482759 |
| MS3_04827 | 0.0003  | 0.0019 | 0.71 | 0.61 | 0.81 | 8.7   | 8.18  | 1.682027735 | 5   | 0  | 2.057613169 | 0           |
| MS3_02899 | 0.00031 | 0.0019 | 0.73 | 0.62 | 0.83 | 8.63  | 7.99  | 1.896481036 | 7   | 0  | 2.880658436 | 0           |
| MS3_10590 | 0.00031 | 0.002  | 0.66 | 0.57 | 0.76 | 8.85  | 9.36  | 0.600495571 | 24  | 5  | 9.87654321  | 17.24137931 |
| MS3_05496 | 0.00032 | 0.002  | 0.73 | 0.62 | 0.84 | 7.75  | 7.09  | 1.934793319 | 7   | 0  | 2.880658436 | 0           |
| MS3_09810 | 0.00034 | 0.0021 | 0.64 | 0.56 | 0.72 | 10.33 | 9.73  | 1.822118805 | 148 | 11 | 60.90534979 | 37.93103448 |
| MS3_01650 | 0.00037 | 0.0023 | 0.62 | 0.53 | 0.7  | 9.08  | 9.56  | 0.618783387 | 63  | 6  | 25.92592593 | 20.68965517 |
| MS3_10221 | 0.00037 | 0.0023 | 0.62 | 0.54 | 0.7  | 8.09  | 7.69  | 1.491824869 | 9   | 0  | 3.703703704 | 0           |
| MS3_05999 | 0.0004  | 0.0024 | 0.67 | 0.58 | 0.76 | 8.99  | 9.48  | 0.612626388 | 38  | 6  | 15.63786008 | 20.68965517 |
| MS3_05387 | 0.00042 | 0.0025 | 0.68 | 0.59 | 0.78 | 8.21  | 7.62  | 1.803988716 | 9   | 0  | 3.703703704 | 0           |
| MS3_10935 | 0.00043 | 0.0026 | 0.71 | 0.6  | 0.81 | 8.13  | 7.58  | 1.733253319 | 0   | 0  | 0           | 0           |
| MS3_10591 | 0.00046 | 0.0027 | 0.64 | 0.55 | 0.73 | 6.81  | 6.41  | 1.491826921 | 0   | 0  | 0           | 0           |
| MS3_07294 | 0.00048 | 0.0028 | 0.62 | 0.53 | 0.71 | 9.21  | 9.65  | 0.644036417 | 71  | 10 | 29.218107   | 34.48275862 |
| MS3_00286 | 0.00055 | 0.0032 | 0.64 | 0.55 | 0.73 | 8.67  | 9.32  | 0.522045766 | 52  | 7  | 21.39917695 | 24.13793103 |
| MS3_00604 | 0.00056 | 0.0033 | 0.63 | 0.54 | 0.73 | 9.2   | 9.71  | 0.600495575 | 67  | 9  | 27.57201646 | 31.03448276 |
| MS3_01852 | 0.0006  | 0.0035 | 0.69 | 0.6  | 0.79 | 7.2   | 6.66  | 1.716008722 | 0   | 0  | 0           | 0           |
| MS3_04375 | 0.00061 | 0.0035 | 0.67 | 0.57 | 0.77 | 7.87  | 7.32  | 1.733253525 | 7   | 0  | 2.880658436 | 0           |
| MS3_08158 | 0.00061 | 0.0035 | 0.7  | 0.59 | 0.8  | 8.64  | 9.12  | 0.61878338  | 7   | 4  | 2.880658436 | 13.79310345 |
| MS3_07702 | 0.00062 | 0.0036 | 0.69 | 0.59 | 0.79 | 10.88 | 9.83  | 2.857651125 | 179 | 10 | 73.66255144 | 34.48275862 |
| MS3_06507 | 0.00063 | 0.0036 | 0.66 | 0.56 | 0.76 | 8.75  | 9.26  | 0.600495569 | 20  | 5  | 8.230452675 | 17.24137931 |
| MS3_00625 | 0.00069 | 0.0039 | 0.74 | 0.63 | 0.86 | 7.83  | 7.05  | 2.181473562 | 5   | 0  | 2.057613169 | 0           |
| MS3_07473 | 0.00072 | 0.0041 | 0.66 | 0.58 | 0.75 | 11.27 | 10.66 | 1.840431399 | 234 | 25 | 96.2962963  | 86.20689655 |
| MS3_07569 | 0.00074 | 0.0041 | 0.7  | 0.61 | 0.79 | 9.69  | 8.9   | 2.203396459 | 96  | 2  | 39.50617284 | 6.896551724 |
| MS3_01686 | 0.00075 | 0.0042 | 0.65 | 0.56 | 0.74 | 8.55  | 8.04  | 1.665291306 | 24  | 0  | 9.87654321  | 0           |
| MS3_07795 | 0.00077 | 0.0042 | 0.65 | 0.56 | 0.74 | 7.41  | 6.97  | 1.552708021 | 2   | 0  | 0.823045267 | 0           |

|           |         |        |      |      |      |       |       |             |     |    |             |             |
|-----------|---------|--------|------|------|------|-------|-------|-------------|-----|----|-------------|-------------|
| MS3_07905 | 0.00077 | 0.0042 | 0.67 | 0.58 | 0.77 | 7.84  | 7.28  | 1.750673061 | 2   | 0  | 0.823045267 | 0           |
| MS3_05539 | 0.00078 | 0.0042 | 0.72 | 0.6  | 0.83 | 8.44  | 7.67  | 2.159766623 | 8   | 1  | 3.29218107  | 3.448275862 |
| MS3_03641 | 0.00081 | 0.0044 | 0.71 | 0.61 | 0.81 | 9.56  | 8.58  | 2.664456323 | 118 | 5  | 48.55967078 | 17.24137931 |
| MS3_03776 | 0.00083 | 0.0045 | 0.77 | 0.67 | 0.88 | 8.75  | 7.77  | 2.66445665  | 35  | 2  | 14.40329218 | 6.896551724 |
| MS3_02289 | 0.00084 | 0.0045 | 0.68 | 0.58 | 0.78 | 8.45  | 8.88  | 0.650509078 | 4   | 0  | 1.646090535 | 0           |
| MS3_02690 | 0.00084 | 0.0045 | 0.56 | 0.47 | 0.66 | 6.79  | 6.29  | 1.648724856 | 10  | 0  | 4.115226337 | 0           |
| MS3_02855 | 0.00085 | 0.0045 | 0.68 | 0.58 | 0.78 | 8.42  | 8.93  | 0.60049556  | 8   | 1  | 3.29218107  | 3.448275862 |
| MS3_06918 | 0.00086 | 0.0046 | 0.62 | 0.53 | 0.71 | 9.28  | 9.65  | 0.690734327 | 66  | 9  | 27.16049383 | 31.03448276 |
| No hits   | 0.0009  | 0.0047 | 0.59 | 0.5  | 0.68 | 9.38  | 9.77  | 0.677056872 | 95  | 12 | 39.09465021 | 41.37931034 |
| MS3_02027 | 0.00091 | 0.0047 | 0.63 | 0.54 | 0.73 | 9.63  | 10.07 | 0.644036419 | 116 | 16 | 47.73662551 | 55.17241379 |
| MS3_05050 | 0.00093 | 0.0048 | 0.72 | 0.63 | 0.82 | 8.44  | 9.09  | 0.522045759 | 11  | 2  | 4.526748971 | 6.896551724 |
| MS3_02425 | 0.00094 | 0.0048 | 0.68 | 0.58 | 0.77 | 9.08  | 9.88  | 0.449328959 | 49  | 8  | 20.16460905 | 27.5862069  |
| MS3_03977 | 0.00094 | 0.0048 | 0.63 | 0.54 | 0.72 | 9.18  | 9.63  | 0.637628148 | 69  | 8  | 28.39506173 | 27.5862069  |
| MS3_03992 | 0.00094 | 0.0048 | 0.71 | 0.6  | 0.81 | 8.76  | 8.07  | 1.993715679 | 38  | 3  | 15.63786008 | 10.34482759 |
| MS3_04311 | 0.00095 | 0.0048 | 0.67 | 0.57 | 0.77 | 8.49  | 7.85  | 1.896481087 | 20  | 0  | 8.230452675 | 0           |
| No hits   | 0.00095 | 0.0048 | 0.66 | 0.56 | 0.75 | 8.74  | 9.27  | 0.58860496  | 27  | 3  | 11.11111111 | 10.34482759 |
| MS3_01261 | 0.00096 | 0.0048 | 0.6  | 0.52 | 0.68 | 9.23  | 9.66  | 0.650509091 | 83  | 9  | 34.1563786  | 31.03448276 |
| MS3_06979 | 0.00096 | 0.0048 | 0.7  | 0.59 | 0.81 | 7.8   | 7.19  | 1.840432136 | 1   | 0  | 0.411522634 | 0           |
| MS3_01348 | 0.00097 | 0.0048 | 0.63 | 0.55 | 0.71 | 8.07  | 7.74  | 1.390968256 | 2   | 0  | 0.823045267 | 0           |
| MS3_02681 | 0.00097 | 0.0048 | 0.65 | 0.56 | 0.73 | 8.03  | 8.43  | 0.670320007 | 3   | 0  | 1.234567901 | 0           |
| MS3_01653 | 0.001   | 0.0051 | 0.67 | 0.58 | 0.77 | 8.88  | 9.36  | 0.618783384 | 17  | 4  | 6.995884774 | 13.79310345 |
| MS3_08607 | 0.0011  | 0.0053 | 0.67 | 0.58 | 0.76 | 8.63  | 9.08  | 0.63762814  | 12  | 1  | 4.938271605 | 3.448275862 |
| MS3_01710 | 0.0012  | 0.006  | 0.66 | 0.57 | 0.75 | 8.27  | 7.88  | 1.476980908 | 2   | 0  | 0.823045267 | 0           |
| MS3_05516 | 0.0012  | 0.0057 | 0.61 | 0.52 | 0.7  | 9.09  | 9.54  | 0.637628147 | 59  | 7  | 24.27983539 | 24.13793103 |
| MS3_06022 | 0.0012  | 0.0059 | 0.69 | 0.58 | 0.8  | 8.78  | 7.88  | 2.459603405 | 52  | 3  | 21.39917695 | 10.34482759 |
| No hits   | 0.0012  | 0.006  | 0.66 | 0.56 | 0.77 | 7.53  | 7.09  | 1.55270785  | 1   | 0  | 0.411522634 | 0           |
| MS3_01761 | 0.0013  | 0.0062 | 0.7  | 0.59 | 0.8  | 8.65  | 9.12  | 0.625002257 | 9   | 1  | 3.703703704 | 3.448275862 |
| MS3_05945 | 0.0013  | 0.0061 | 0.68 | 0.58 | 0.77 | 8.52  | 7.92  | 1.822118969 | 24  | 1  | 9.87654321  | 3.448275862 |
| MS3_02787 | 0.0014  | 0.0066 | 0.77 | 0.64 | 0.9  | 9.31  | 8.15  | 3.189933516 | 68  | 5  | 27.98353909 | 17.24137931 |
| MS3_08059 | 0.0014  | 0.0066 | 0.68 | 0.58 | 0.79 | 7.25  | 6.81  | 1.552708323 | 1   | 0  | 0.411522634 | 0           |
| MS3_09353 | 0.0015  | 0.0072 | 0.67 | 0.58 | 0.76 | 8.74  | 8.28  | 1.584074046 | 11  | 0  | 4.526748971 | 0           |
| MS3_06126 | 0.0015  | 0.0072 | 0.68 | 0.58 | 0.78 | 8.74  | 8.27  | 1.599994257 | 7   | 0  | 2.880658436 | 0           |
| MS3_10083 | 0.0015  | 0.0068 | 0.7  | 0.59 | 0.8  | 9.12  | 8.36  | 2.138276312 | 67  | 4  | 27.57201646 | 13.79310345 |
| MS3_01365 | 0.0016  | 0.0073 | 0.74 | 0.63 | 0.85 | 10.13 | 9.16  | 2.637944484 | 132 | 6  | 54.32098765 | 20.68965517 |
| MS3_05465 | 0.0016  | 0.0073 | 0.69 | 0.59 | 0.8  | 8.68  | 9.23  | 0.576949799 | 14  | 5  | 5.761316872 | 17.24137931 |
| MS3_08398 | 0.0016  | 0.0075 | 0.63 | 0.54 | 0.73 | 8.85  | 9.21  | 0.697676319 | 14  | 3  | 5.761316872 | 10.34482759 |
| MS3_00805 | 0.0017  | 0.0077 | 0.66 | 0.56 | 0.76 | 6.77  | 6.29  | 1.616077833 | 5   | 0  | 2.057613169 | 0           |

|           |        |        |      |      |      |      |      |             |     |    |             |             |
|-----------|--------|--------|------|------|------|------|------|-------------|-----|----|-------------|-------------|
| MS3_00900 | 0.0017 | 0.0077 | 0.64 | 0.53 | 0.74 | 8.98 | 9.49 | 0.600495573 | 39  | 8  | 16.04938272 | 27.5862069  |
| MS3_01302 | 0.0017 | 0.0077 | 0.68 | 0.58 | 0.79 | 7.69 | 7.06 | 1.877611571 | 4   | 0  | 1.646090535 | 0           |
| MS3_02157 | 0.0017 | 0.0077 | 0.71 | 0.59 | 0.82 | 9.05 | 8.38 | 1.954237397 | 43  | 3  | 17.69547325 | 10.34482759 |
| No hits   | 0.0017 | 0.0078 | 0.65 | 0.56 | 0.75 | 7.76 | 7.26 | 1.648721786 | 2   | 0  | 0.823045267 | 0           |
| MS3_01276 | 0.0018 | 0.0079 | 0.65 | 0.57 | 0.73 | 8.76 | 8.39 | 1.447734654 | 17  | 0  | 6.995884774 | 0           |
| MS3_02856 | 0.0018 | 0.0079 | 0.58 | 0.5  | 0.67 | 9.18 | 9.59 | 0.663650246 | 67  | 7  | 27.57201646 | 24.13793103 |
| MS3_05219 | 0.0018 | 0.0081 | 0.68 | 0.58 | 0.77 | 8.79 | 8.4  | 1.476980834 | 6   | 0  | 2.469135802 | 0           |
| MS3_06898 | 0.0018 | 0.0079 | 0.67 | 0.57 | 0.78 | 8.51 | 7.99 | 1.682027775 | 12  | 0  | 4.938271605 | 0           |
| MS3_08262 | 0.0018 | 0.0079 | 0.65 | 0.57 | 0.74 | 8.22 | 8.72 | 0.606530632 | 10  | 0  | 4.115226337 | 0           |
| MS3_07944 | 0.0019 | 0.0082 | 0.67 | 0.57 | 0.77 | 9.09 | 8.47 | 1.8589281   | 58  | 3  | 23.86831276 | 10.34482759 |
| MS3_07968 | 0.0019 | 0.0082 | 0.76 | 0.65 | 0.88 | 7.7  | 6.72 | 2.664459574 | 20  | 3  | 8.230452675 | 10.34482759 |
| MS3_00048 | 0.0021 | 0.0089 | 0.59 | 0.51 | 0.68 | 9.09 | 8.62 | 1.599994225 | 43  | 0  | 17.69547325 | 0           |
| MS3_00891 | 0.0021 | 0.009  | 0.73 | 0.62 | 0.85 | 7.67 | 7.14 | 1.698933006 | 2   | 0  | 0.823045267 | 0           |
| MS3_03576 | 0.0024 | 0.01   | 0.65 | 0.56 | 0.74 | 8.42 | 7.96 | 1.584074101 | 9   | 0  | 3.703703704 | 0           |
| MS3_05280 | 0.0024 | 0.01   | 0.64 | 0.54 | 0.74 | 9.15 | 9.51 | 0.697676322 | 40  | 7  | 16.46090535 | 24.13793103 |
| MS3_05836 | 0.0024 | 0.01   | 0.62 | 0.53 | 0.72 | 7.27 | 6.9  | 1.447735383 | 2   | 0  | 0.823045267 | 0           |
| MS3_00560 | 0.0025 | 0.011  | 0.7  | 0.59 | 0.82 | 8.1  | 7.43 | 1.954237828 | 10  | 0  | 4.115226337 | 0           |
| MS3_01643 | 0.0025 | 0.01   | 0.64 | 0.54 | 0.73 | 8.62 | 8.2  | 1.521961621 | 16  | 0  | 6.58436214  | 0           |
| MS3_07590 | 0.0025 | 0.01   | 0.64 | 0.56 | 0.73 | 9.01 | 9.57 | 0.571209058 | 55  | 5  | 22.63374486 | 17.24137931 |
| MS3_09290 | 0.0025 | 0.011  | 0.64 | 0.53 | 0.74 | 7.85 | 7.33 | 1.682028117 | 9   | 0  | 3.703703704 | 0           |
| MS3_09684 | 0.0025 | 0.01   | 0.58 | 0.48 | 0.69 | 8.16 | 7.61 | 1.733253302 | 25  | 0  | 10.28806584 | 0           |
| MS3_06149 | 0.0027 | 0.011  | 0.63 | 0.54 | 0.72 | 9.19 | 9.62 | 0.650509091 | 65  | 10 | 26.74897119 | 34.48275862 |
| MS3_02734 | 0.0027 | 0.011  | 0.65 | 0.56 | 0.75 | 7.88 | 7.44 | 1.552707532 | 2   | 0  | 0.823045267 | 0           |
| MS3_04646 | 0.0027 | 0.011  | 0.71 | 0.59 | 0.83 | 9.94 | 9.09 | 2.339646876 | 134 | 7  | 55.14403292 | 24.13793103 |
| MS3_01902 | 0.0028 | 0.011  | 0.65 | 0.55 | 0.74 | 8.59 | 8.96 | 0.690734318 | 4   | 0  | 1.646090535 | 0           |
| MS3_11429 | 0.0028 | 0.011  | 0.65 | 0.57 | 0.74 | 8.39 | 8.82 | 0.650509075 | 8   | 1  | 3.29218107  | 3.448275862 |
| MS3_00316 | 0.0029 | 0.012  | 0.64 | 0.55 | 0.73 | 7.42 | 7.09 | 1.390968595 | 1   | 0  | 0.411522634 | 0           |
| MS3_03101 | 0.0029 | 0.012  | 0.64 | 0.54 | 0.74 | 9.14 | 9.64 | 0.606530655 | 55  | 10 | 22.63374486 | 34.48275862 |
| MS3_09089 | 0.0029 | 0.012  | 0.7  | 0.59 | 0.81 | 7.44 | 6.9  | 1.716008013 | 2   | 0  | 0.823045267 | 0           |
| MS3_05216 | 0.003  | 0.012  | 0.73 | 0.63 | 0.82 | 8.77 | 9.41 | 0.527292415 | 32  | 8  | 13.16872428 | 27.5862069  |
| MS3_08975 | 0.003  | 0.012  | 0.67 | 0.57 | 0.77 | 8.46 | 7.5  | 2.611697155 | 59  | 2  | 24.27983539 | 6.896551724 |
| MS3_10193 | 0.003  | 0.012  | 0.68 | 0.57 | 0.78 | 7.93 | 7.39 | 1.716007294 | 10  | 0  | 4.115226337 | 0           |
| MS3_00196 | 0.0031 | 0.012  | 0.69 | 0.58 | 0.8  | 8.72 | 8.13 | 1.803988524 | 38  | 2  | 15.63786008 | 6.896551724 |
| MS3_09662 | 0.0031 | 0.012  | 0.61 | 0.52 | 0.71 | 7.32 | 6.76 | 1.750674085 | 17  | 0  | 6.995884774 | 0           |
| MS3_02234 | 0.0032 | 0.013  | 0.67 | 0.57 | 0.78 | 8.4  | 7.86 | 1.716007031 | 12  | 0  | 4.938271605 | 0           |
| MS3_08160 | 0.0032 | 0.013  | 0.65 | 0.56 | 0.74 | 9.05 | 9.52 | 0.625002263 | 55  | 9  | 22.63374486 | 31.03448276 |
| MS3_08737 | 0.0032 | 0.012  | 0.61 | 0.52 | 0.71 | 8.88 | 8.44 | 1.552707261 | 31  | 0  | 12.75720165 | 0           |

|           |        |       |      |      |      |      |       |             |     |    |             |             |
|-----------|--------|-------|------|------|------|------|-------|-------------|-----|----|-------------|-------------|
| MS3_10729 | 0.0032 | 0.013 | 0.65 | 0.56 | 0.74 | 8.33 | 8.67  | 0.711770302 | 3   | 0  | 1.234567901 | 0           |
| MS3_01516 | 0.0033 | 0.013 | 0.67 | 0.57 | 0.78 | 8.8  | 8.18  | 1.858928146 | 30  | 1  | 12.34567901 | 3.448275862 |
| MS3_06877 | 0.0033 | 0.013 | 0.62 | 0.53 | 0.72 | 9.36 | 9.91  | 0.576949808 | 86  | 14 | 35.3909465  | 48.27586207 |
| MS3_02141 | 0.0035 | 0.013 | 0.69 | 0.59 | 0.78 | 8.58 | 8.94  | 0.697676313 | 2   | 0  | 0.823045267 | 0           |
| MS3_06538 | 0.0035 | 0.013 | 0.68 | 0.57 | 0.79 | 8.29 | 8.77  | 0.618783368 | 6   | 2  | 2.469135802 | 6.896551724 |
| MS3_05953 | 0.0037 | 0.014 | 0.65 | 0.56 | 0.74 | 8.91 | 8.58  | 1.390968152 | 15  | 0  | 6.172839506 | 0           |
| MS3_07010 | 0.0037 | 0.014 | 0.63 | 0.54 | 0.72 | 8.9  | 9.45  | 0.576949803 | 62  | 8  | 25.51440329 | 27.5862069  |
| MS3_08776 | 0.0037 | 0.014 | 0.67 | 0.56 | 0.78 | 8.68 | 9.04  | 0.697676316 | 5   | 1  | 2.057613169 | 3.448275862 |
| MS3_01611 | 0.004  | 0.015 | 0.68 | 0.58 | 0.78 | 8.26 | 8.75  | 0.612626369 | 9   | 3  | 3.703703704 | 10.34482759 |
| MS3_01938 | 0.004  | 0.015 | 0.65 | 0.55 | 0.76 | 8.95 | 9.44  | 0.612626388 | 37  | 9  | 15.22633745 | 31.03448276 |
| MS3_03979 | 0.004  | 0.015 | 0.65 | 0.54 | 0.75 | 8.11 | 7.62  | 1.632316465 | 13  | 0  | 5.349794239 | 0           |
| MS3_06928 | 0.004  | 0.015 | 0.58 | 0.49 | 0.66 | 9.47 | 9.75  | 0.75578374  | 87  | 10 | 35.80246914 | 34.48275862 |
| MS3_11250 | 0.004  | 0.015 | 0.6  | 0.51 | 0.7  | 9.14 | 9.51  | 0.690734326 | 51  | 7  | 20.98765432 | 24.13793103 |
| MS3_03853 | 0.0042 | 0.016 | 0.64 | 0.54 | 0.73 | 7.18 | 6.82  | 1.433330291 | 0   | 0  | 0           | 0           |
| MS3_08953 | 0.0044 | 0.016 | 0.65 | 0.54 | 0.75 | 8.27 | 7.6   | 1.954237682 | 33  | 1  | 13.58024691 | 3.448275862 |
| MS3_09691 | 0.0044 | 0.016 | 0.62 | 0.51 | 0.72 | 9.84 | 10.23 | 0.677056873 | 156 | 22 | 64.19753086 | 75.86206897 |
| MS3_06211 | 0.0045 | 0.016 | 0.63 | 0.54 | 0.72 | 8.9  | 9.26  | 0.697676319 | 25  | 2  | 10.28806584 | 6.896551724 |
| MS3_04609 | 0.0046 | 0.017 | 0.69 | 0.57 | 0.8  | 8.43 | 7.91  | 1.682027796 | 5   | 1  | 2.057613169 | 3.448275862 |
| MS3_07637 | 0.0047 | 0.017 | 0.63 | 0.53 | 0.72 | 7.58 | 7.27  | 1.363425419 | 1   | 0  | 0.411522634 | 0           |
| MS3_03695 | 0.0048 | 0.017 | 0.67 | 0.56 | 0.78 | 6.23 | 6.95  | 0.486750815 | 1   | 0  | 0.411522634 | 0           |
| MS3_00498 | 0.0049 | 0.018 | 0.65 | 0.54 | 0.75 | 9.63 | 9.07  | 1.750672516 | 88  | 5  | 36.21399177 | 17.24137931 |
| MS3_03417 | 0.0051 | 0.018 | 0.67 | 0.55 | 0.79 | 9.03 | 8.56  | 1.599994229 | 24  | 2  | 9.87654321  | 6.896551724 |
| MS3_02685 | 0.0052 | 0.019 | 0.55 | 0.46 | 0.64 | 9.46 | 9.79  | 0.718923731 | 106 | 11 | 43.62139918 | 37.93103448 |
| MS3_06559 | 0.0052 | 0.018 | 0.67 | 0.55 | 0.79 | 8.15 | 7.62  | 1.698932576 | 0   | 0  | 0           | 0           |
| MS3_08413 | 0.0052 | 0.018 | 0.63 | 0.54 | 0.72 | 8.49 | 8.87  | 0.683861394 | 10  | 0  | 4.115226337 | 0           |
| MS3_08823 | 0.0054 | 0.019 | 0.64 | 0.54 | 0.74 | 8.46 | 8.02  | 1.552707317 | 18  | 1  | 7.407407407 | 3.448275862 |
| MS3_05676 | 0.0055 | 0.019 | 0.66 | 0.56 | 0.77 | 8.77 | 8.32  | 1.568312241 | 7   | 0  | 2.880658436 | 0           |
| MS3_07374 | 0.0055 | 0.019 | 0.61 | 0.51 | 0.72 | 9.06 | 9.54  | 0.618783387 | 51  | 10 | 20.98765432 | 34.48275862 |
| MS3_08144 | 0.0055 | 0.019 | 0.64 | 0.55 | 0.72 | 7.81 | 7.29  | 1.682028156 | 8   | 1  | 3.29218107  | 3.448275862 |
| MS3_10510 | 0.0055 | 0.019 | 0.66 | 0.56 | 0.76 | 8.86 | 9.51  | 0.522045769 | 61  | 9  | 25.10288066 | 31.03448276 |
| MS3_10753 | 0.0055 | 0.019 | 0.62 | 0.52 | 0.72 | 9.16 | 9.51  | 0.704688086 | 44  | 6  | 18.10699588 | 20.68965517 |
| MS3_09735 | 0.0056 | 0.019 | 0.62 | 0.52 | 0.71 | 9.18 | 9.56  | 0.683861405 | 53  | 6  | 21.81069959 | 20.68965517 |
| MS3_03350 | 0.0057 | 0.019 | 0.68 | 0.57 | 0.79 | 8.52 | 7.73  | 2.203396764 | 43  | 3  | 17.69547325 | 10.34482759 |
| MS3_07213 | 0.0057 | 0.02  | 0.7  | 0.59 | 0.81 | 8.32 | 7.38  | 2.559982262 | 47  | 2  | 19.34156379 | 6.896551724 |
| MS3_07816 | 0.0057 | 0.02  | 0.66 | 0.57 | 0.75 | 7.46 | 8.15  | 0.501575945 | 18  | 2  | 7.407407407 | 6.896551724 |
| MS3_02752 | 0.0059 | 0.02  | 0.58 | 0.49 | 0.68 | 9.22 | 9.6   | 0.683861406 | 64  | 6  | 26.33744856 | 20.68965517 |
| MS3_00934 | 0.006  | 0.02  | 0.62 | 0.52 | 0.72 | 7.68 | 7.34  | 1.404947883 | 0   | 0  | 0           | 0           |



|           |        |       |      |      |      |       |      |             |     |    |             |             |
|-----------|--------|-------|------|------|------|-------|------|-------------|-----|----|-------------|-------------|
| MS3_03618 | 0.006  | 0.02  | 0.63 | 0.53 | 0.72 | 7.61  | 7.16 | 1.568312747 | 1   | 0  | 0.411522634 | 0           |
| MS3_02048 | 0.0062 | 0.021 | 0.65 | 0.55 | 0.76 | 7.74  | 8.19 | 0.63762808  | 1   | 0  | 0.411522634 | 0           |
| MS3_03938 | 0.0062 | 0.021 | 0.63 | 0.52 | 0.74 | 7.24  | 6.78 | 1.584075215 | 5   | 0  | 2.057613169 | 0           |
| MS3_09160 | 0.0062 | 0.021 | 0.62 | 0.53 | 0.71 | 7.87  | 7.5  | 1.447734846 | 5   | 0  | 2.057613169 | 0           |
| MS3_09371 | 0.0065 | 0.022 | 0.64 | 0.54 | 0.74 | 8.58  | 8.07 | 1.665291299 | 30  | 1  | 12.34567901 | 3.448275862 |
| MS3_07824 | 0.0066 | 0.022 | 0.67 | 0.57 | 0.78 | 9.58  | 9    | 1.786038449 | 79  | 4  | 32.51028807 | 13.79310345 |
| MS3_05203 | 0.0067 | 0.022 | 0.66 | 0.56 | 0.76 | 8.24  | 8.64 | 0.67032002  | 2   | 1  | 0.823045267 | 3.448275862 |
| MS3_06069 | 0.0067 | 0.022 | 0.69 | 0.58 | 0.79 | 8.95  | 9.57 | 0.537944431 | 41  | 8  | 16.87242798 | 27.5862069  |
| MS3_06669 | 0.0067 | 0.022 | 0.56 | 0.47 | 0.65 | 9.1   | 9.4  | 0.740818217 | 37  | 4  | 15.22633745 | 13.79310345 |
| MS3_10017 | 0.0068 | 0.022 | 0.67 | 0.55 | 0.79 | 8.24  | 7.69 | 1.73325326  | 8   | 1  | 3.29218107  | 3.448275862 |
| MS3_09119 | 0.0071 | 0.023 | 0.62 | 0.52 | 0.72 | 8.69  | 8.03 | 1.934792485 | 48  | 1  | 19.75308642 | 3.448275862 |
| MS3_02160 | 0.0072 | 0.023 | 0.66 | 0.55 | 0.77 | 7.9   | 7.44 | 1.584074314 | 2   | 0  | 0.823045267 | 0           |
| MS3_02688 | 0.0074 | 0.024 | 0.63 | 0.54 | 0.73 | 10.73 | 10.3 | 1.537257525 | 206 | 17 | 84.77366255 | 58.62068966 |
| MS3_04688 | 0.0074 | 0.024 | 0.42 | 0.32 | 0.52 | 9.28  | 8.67 | 1.840431437 | 70  | 2  | 28.80658436 | 6.896551724 |
| MS3_05150 | 0.0075 | 0.024 | 0.66 | 0.56 | 0.76 | 7.87  | 7.39 | 1.616074782 | 5   | 0  | 2.057613169 | 0           |
| MS3_01627 | 0.0076 | 0.025 | 0.45 | 0.35 | 0.55 | 9.61  | 9.96 | 0.704688088 | 118 | 11 | 48.55967078 | 37.93103448 |
| MS3_10489 | 0.0076 | 0.024 | 0.64 | 0.56 | 0.73 | 8.05  | 8.45 | 0.670320008 | 6   | 1  | 2.469135802 | 3.448275862 |
| MS3_09644 | 0.0078 | 0.025 | 0.67 | 0.56 | 0.78 | 8.22  | 7.63 | 1.80398871  | 25  | 1  | 10.28806584 | 3.448275862 |
| MS3_04598 | 0.0083 | 0.027 | 0.67 | 0.55 | 0.78 | 8.71  | 8.13 | 1.786038537 | 29  | 4  | 11.93415638 | 13.79310345 |
| MS3_08805 | 0.0083 | 0.027 | 0.64 | 0.54 | 0.74 | 8.71  | 9.03 | 0.726149028 | 5   | 3  | 2.057613169 | 10.34482759 |
| MS3_01339 | 0.0084 | 0.027 | 0.64 | 0.54 | 0.75 | 8.66  | 9.11 | 0.63762814  | 16  | 4  | 6.58436214  | 13.79310345 |
| MS3_03269 | 0.0085 | 0.027 | 0.64 | 0.54 | 0.74 | 9.27  | 9.73 | 0.631283642 | 64  | 10 | 26.33744856 | 34.48275862 |
| MS3_05016 | 0.0085 | 0.027 | 0.68 | 0.57 | 0.8  | 8.47  | 7.94 | 1.69893245  | 4   | 1  | 1.646090535 | 3.448275862 |
| MS3_09086 | 0.0086 | 0.027 | 0.62 | 0.52 | 0.72 | 7.66  | 7.31 | 1.419067868 | 0   | 0  | 0           | 0           |
| MS3_02545 | 0.0087 | 0.027 | 0.67 | 0.55 | 0.78 | 8.97  | 8.42 | 1.733253074 | 38  | 2  | 15.63786008 | 6.896551724 |
| MS3_11139 | 0.009  | 0.028 | 0.55 | 0.47 | 0.64 | 9.55  | 9.79 | 0.78662786  | 104 | 10 | 42.79835391 | 34.48275862 |
| MS3_07337 | 0.0092 | 0.029 | 0.65 | 0.55 | 0.76 | 7.39  | 6.86 | 1.69893353  | 9   | 0  | 3.703703704 | 0           |
| MS3_07158 | 0.0095 | 0.029 | 0.64 | 0.54 | 0.74 | 8.39  | 7.99 | 1.491824792 | 6   | 0  | 2.469135802 | 0           |
| MS3_01141 | 0.0099 | 0.031 | 0.64 | 0.54 | 0.75 | 8.19  | 7.6  | 1.803988728 | 12  | 0  | 4.938271605 | 0           |
| MS3_01922 | 0.01   | 0.032 | 0.6  | 0.51 | 0.69 | 8.84  | 9.2  | 0.697676319 | 22  | 2  | 9.053497942 | 6.896551724 |
| MS3_07606 | 0.01   | 0.031 | 0.57 | 0.47 | 0.68 | 9.59  | 9.9  | 0.733446955 | 109 | 13 | 44.85596708 | 44.82758621 |
| MS3_01777 | 0.011  | 0.035 | 0.66 | 0.57 | 0.76 | 8.7   | 9.03 | 0.718923724 | 9   | 0  | 3.703703704 | 0           |
| MS3_01857 | 0.011  | 0.033 | 0.64 | 0.55 | 0.73 | 10.39 | 9.68 | 2.033991265 | 170 | 14 | 69.95884774 | 48.27586207 |
| MS3_02393 | 0.011  | 0.033 | 0.63 | 0.53 | 0.72 | 8.48  | 8.1  | 1.462284661 | 14  | 0  | 5.761316872 | 0           |
| MS3_03193 | 0.011  | 0.034 | 0.64 | 0.53 | 0.76 | 8.55  | 8.91 | 0.697676313 | 7   | 2  | 2.880658436 | 6.896551724 |
| MS3_07372 | 0.011  | 0.033 | 0.63 | 0.54 | 0.72 | 9.11  | 9.77 | 0.51685133  | 82  | 10 | 33.74485597 | 34.48275862 |
| MS3_09536 | 0.011  | 0.033 | 0.56 | 0.47 | 0.65 | 7     | 6.74 | 1.296930822 | 3   | 0  | 1.234567901 | 0           |

|           |       |       |      |      |      |       |       |             |     |    |             |             |
|-----------|-------|-------|------|------|------|-------|-------|-------------|-----|----|-------------|-------------|
| MS3_01597 | 0.012 | 0.037 | 0.63 | 0.52 | 0.75 | 7.26  | 6.89  | 1.447735399 | 3   | 0  | 1.234567901 | 0           |
| MS3_07531 | 0.012 | 0.037 | 0.67 | 0.58 | 0.77 | 8.86  | 9.41  | 0.576949803 | 42  | 8  | 17.28395062 | 27.5862069  |
| MS3_01049 | 0.013 | 0.039 | 0.65 | 0.54 | 0.77 | 9.32  | 8.45  | 2.386910944 | 95  | 6  | 39.09465021 | 20.68965517 |
| MS3_01193 | 0.013 | 0.04  | 0.55 | 0.45 | 0.65 | 8.62  | 8.13  | 1.632316308 | 41  | 0  | 16.87242798 | 0           |
| MS3_01668 | 0.013 | 0.038 | 0.67 | 0.56 | 0.78 | 9.4   | 8.7   | 2.01375275  | 67  | 3  | 27.57201646 | 10.34482759 |
| MS3_02086 | 0.013 | 0.039 | 0.46 | 0.36 | 0.55 | 9.58  | 9.88  | 0.740818219 | 113 | 13 | 46.50205761 | 44.82758621 |
| MS3_07345 | 0.013 | 0.039 | 0.55 | 0.46 | 0.64 | 8.85  | 9.17  | 0.72614903  | 30  | 1  | 12.34567901 | 3.448275862 |
| MS3_08689 | 0.013 | 0.038 | 0.67 | 0.56 | 0.78 | 9.14  | 8.65  | 1.632316251 | 29  | 2  | 11.93415638 | 6.896551724 |
| MS3_08943 | 0.013 | 0.038 | 0.65 | 0.55 | 0.76 | 8.42  | 8.78  | 0.697676309 | 2   | 0  | 0.823045267 | 0           |
| MS3_00862 | 0.014 | 0.041 | 0.59 | 0.49 | 0.69 | 9     | 9.41  | 0.663650244 | 59  | 7  | 24.27983539 | 24.13793103 |
| MS3_02044 | 0.014 | 0.041 | 0.7  | 0.58 | 0.82 | 8.92  | 8.24  | 1.973877834 | 49  | 3  | 20.16460905 | 10.34482759 |
| MS3_06403 | 0.014 | 0.041 | 0.59 | 0.5  | 0.68 | 7.24  | 6.74  | 1.648722728 | 16  | 1  | 6.58436214  | 3.448275862 |
| MS3_06834 | 0.014 | 0.041 | 0.63 | 0.52 | 0.74 | 7.31  | 6.9   | 1.506818641 | 1   | 0  | 0.411522634 | 0           |
| MS3_09683 | 0.014 | 0.041 | 0.64 | 0.55 | 0.73 | 8.7   | 9.27  | 0.565525428 | 31  | 4  | 12.75720165 | 13.79310345 |
| MS3_01983 | 0.015 | 0.043 | 0.64 | 0.53 | 0.74 | 8.87  | 9.22  | 0.704688083 | 23  | 4  | 9.465020576 | 13.79310345 |
| MS3_04286 | 0.015 | 0.043 | 0.66 | 0.55 | 0.77 | 7.77  | 7.24  | 1.69893288  | 8   | 1  | 3.29218107  | 3.448275862 |
| MS3_06243 | 0.015 | 0.043 | 0.64 | 0.53 | 0.75 | 7.86  | 7.49  | 1.447734851 | 4   | 0  | 1.646090535 | 0           |
| MS3_08717 | 0.015 | 0.042 | 0.63 | 0.52 | 0.74 | 8.83  | 9.16  | 0.718923726 | 9   | 2  | 3.703703704 | 6.896551724 |
| MS3_09070 | 0.015 | 0.043 | 0.65 | 0.53 | 0.78 | 6.36  | 6.99  | 0.53259066  | 2   | 1  | 0.823045267 | 3.448275862 |
| No hits   | 0.015 | 0.042 | 0.61 | 0.52 | 0.71 | 8.33  | 8.86  | 0.588604947 | 25  | 2  | 10.28806584 | 6.896551724 |
| MS3_01775 | 0.016 | 0.044 | 0.61 | 0.52 | 0.71 | 8.32  | 7.95  | 1.447734709 | 7   | 0  | 2.880658436 | 0           |
| MS3_02176 | 0.016 | 0.044 | 0.67 | 0.54 | 0.79 | 8.86  | 9.25  | 0.677056867 | 12  | 5  | 4.938271605 | 17.24137931 |
| MS3_02747 | 0.016 | 0.046 | 0.61 | 0.51 | 0.72 | 8.38  | 8.9   | 0.594520528 | 17  | 4  | 6.995884774 | 13.79310345 |
| MS3_03603 | 0.016 | 0.045 | 0.63 | 0.52 | 0.73 | 8.47  | 8.79  | 0.726149022 | 4   | 0  | 1.646090535 | 0           |
| MS3_06112 | 0.016 | 0.044 | 0.61 | 0.51 | 0.72 | 8.77  | 9.15  | 0.6838614   | 25  | 6  | 10.28806584 | 20.68965517 |
| MS3_07594 | 0.016 | 0.044 | 0.63 | 0.53 | 0.74 | 7.81  | 7.44  | 1.447734876 | 1   | 0  | 0.411522634 | 0           |
| MS3_08996 | 0.016 | 0.044 | 0.61 | 0.51 | 0.71 | 9.46  | 9.84  | 0.683861407 | 98  | 15 | 40.32921811 | 51.72413793 |
| MS3_09865 | 0.016 | 0.044 | 0.7  | 0.6  | 0.81 | 9.65  | 9.27  | 1.462284596 | 69  | 3  | 28.39506173 | 10.34482759 |
| MS3_00719 | 0.017 | 0.047 | 0.63 | 0.53 | 0.73 | 8.53  | 8.12  | 1.50681786  | 19  | 0  | 7.818930041 | 0           |
| MS3_01445 | 0.017 | 0.047 | 0.55 | 0.45 | 0.65 | 7.1   | 6.72  | 1.462285723 | 12  | 0  | 4.938271605 | 0           |
| MS3_02928 | 0.017 | 0.046 | 0.66 | 0.55 | 0.78 | 8.77  | 8.3   | 1.599994253 | 13  | 2  | 5.349794239 | 6.896551724 |
| MS3_04178 | 0.017 | 0.046 | 0.65 | 0.54 | 0.76 | 7.38  | 6.91  | 1.599995164 | 9   | 1  | 3.703703704 | 3.448275862 |
| MS3_05730 | 0.018 | 0.049 | 0.65 | 0.54 | 0.75 | 11.33 | 10.66 | 1.954237321 | 230 | 21 | 94.65020576 | 72.4137931  |
| MS3_07126 | 0.018 | 0.049 | 0.62 | 0.53 | 0.72 | 8.06  | 8.35  | 0.748263535 | 3   | 0  | 1.234567901 | 0           |
| MS3_08533 | 0.018 | 0.049 | 0.64 | 0.52 | 0.75 | 8.25  | 8.62  | 0.690734306 | 3   | 1  | 1.234567901 | 3.448275862 |
| MS3_09274 | 0.018 | 0.049 | 0.54 | 0.45 | 0.63 | 9.09  | 9.38  | 0.748263563 | 56  | 4  | 23.04526749 | 13.79310345 |
| MS3_10671 | 0.018 | 0.049 | 0.64 | 0.53 | 0.75 | 7.92  | 8.74  | 0.440431608 | 26  | 4  | 10.69958848 | 13.79310345 |

|           |       |       |      |      |      |      |      |             |    |    |             |             |
|-----------|-------|-------|------|------|------|------|------|-------------|----|----|-------------|-------------|
| MS3_02944 | 0.019 | 0.051 | 0.63 | 0.53 | 0.73 | 8.74 | 9.03 | 0.748263559 | 5  | 1  | 2.057613169 | 3.448275862 |
| MS3_10440 | 0.019 | 0.051 | 0.63 | 0.53 | 0.73 | 8.57 | 8.17 | 1.491824763 | 19 | 0  | 7.818930041 | 0           |
| MS3_04158 | 0.02  | 0.054 | 0.59 | 0.49 | 0.69 | 8.78 | 8.37 | 1.50681783  | 30 | 0  | 12.34567901 | 0           |
| MS3_05350 | 0.02  | 0.053 | 0.62 | 0.52 | 0.72 | 7.97 | 7.58 | 1.476981002 | 5  | 0  | 2.057613169 | 0           |
| MS3_08891 | 0.02  | 0.053 | 0.6  | 0.49 | 0.71 | 7.43 | 7.11 | 1.377128199 | 2  | 0  | 0.823045267 | 0           |
| MS3_09952 | 0.02  | 0.055 | 0.64 | 0.53 | 0.75 | 8.43 | 8.81 | 0.683861392 | 4  | 0  | 1.646090535 | 0           |
| MS3_02356 | 0.021 | 0.055 | 0.63 | 0.53 | 0.74 | 8.76 | 9.08 | 0.726149029 | 15 | 2  | 6.172839506 | 6.896551724 |
| MS3_03270 | 0.021 | 0.055 | 0.65 | 0.52 | 0.77 | 8.77 | 8.29 | 1.616074465 | 12 | 1  | 4.938271605 | 3.448275862 |
| MS3_04025 | 0.021 | 0.055 | 0.63 | 0.52 | 0.74 | 8.31 | 8.64 | 0.718923712 | 1  | 0  | 0.411522634 | 0           |
| MS3_06668 | 0.021 | 0.055 | 0.63 | 0.52 | 0.73 | 8.38 | 8.78 | 0.670320027 | 4  | 2  | 1.646090535 | 6.896551724 |
| MS3_01001 | 0.023 | 0.061 | 0.62 | 0.53 | 0.71 | 7.97 | 8.22 | 0.778800746 | 0  | 0  | 0           | 0           |
| MS3_05614 | 0.023 | 0.059 | 0.63 | 0.53 | 0.72 | 9.08 | 8.83 | 1.284025427 | 16 | 0  | 6.58436214  | 0           |
| MS3_01905 | 0.024 | 0.062 | 0.64 | 0.53 | 0.75 | 8.44 | 8.78 | 0.711770306 | 7  | 1  | 2.880658436 | 3.448275862 |
| MS3_04276 | 0.024 | 0.063 | 0.62 | 0.5  | 0.74 | 8.03 | 7.52 | 1.665291508 | 15 | 1  | 6.172839506 | 3.448275862 |
| MS3_05646 | 0.024 | 0.064 | 0.61 | 0.51 | 0.71 | 7.93 | 7.6  | 1.390968297 | 4  | 0  | 1.646090535 | 0           |
| MS3_02807 | 0.025 | 0.065 | 0.58 | 0.48 | 0.67 | 9.05 | 9.47 | 0.657046815 | 67 | 6  | 27.57201646 | 20.68965517 |
| MS3_03775 | 0.025 | 0.065 | 0.59 | 0.5  | 0.68 | 9.26 | 9.56 | 0.740818218 | 58 | 7  | 23.86831276 | 24.13793103 |
| MS3_04896 | 0.025 | 0.065 | 0.68 | 0.55 | 0.8  | 8.84 | 9.21 | 0.690734323 | 14 | 6  | 5.761316872 | 20.68965517 |
| MS3_05370 | 0.025 | 0.064 | 0.57 | 0.48 | 0.66 | 7.79 | 7.48 | 1.363425315 | 6  | 0  | 2.469135802 | 0           |
| MS3_11376 | 0.025 | 0.064 | 0.64 | 0.53 | 0.76 | 8.7  | 9.1  | 0.670320036 | 10 | 2  | 4.115226337 | 6.896551724 |
| MS3_01771 | 0.026 | 0.066 | 0.66 | 0.54 | 0.77 | 8.91 | 9.29 | 0.683861403 | 24 | 7  | 9.87654321  | 24.13793103 |
| MS3_02275 | 0.026 | 0.066 | 0.56 | 0.47 | 0.65 | 9.24 | 9.52 | 0.755783738 | 65 | 6  | 26.74897119 | 20.68965517 |
| MS3_08366 | 0.026 | 0.066 | 0.61 | 0.51 | 0.71 | 8.21 | 7.9  | 1.363425201 | 6  | 0  | 2.469135802 | 0           |
| MS3_09942 | 0.026 | 0.067 | 0.56 | 0.46 | 0.66 | 9.45 | 9.71 | 0.771051584 | 84 | 9  | 34.56790123 | 31.03448276 |
| MS3_02346 | 0.027 | 0.068 | 0.59 | 0.49 | 0.68 | 7.73 | 7.42 | 1.36342534  | 4  | 0  | 1.646090535 | 0           |
| MS3_03824 | 0.027 | 0.068 | 0.6  | 0.5  | 0.71 | 7.9  | 7.51 | 1.476981034 | 10 | 0  | 4.115226337 | 0           |
| MS3_04261 | 0.027 | 0.068 | 0.6  | 0.49 | 0.71 | 7.71 | 7.33 | 1.462284924 | 9  | 0  | 3.703703704 | 0           |
| MS3_06214 | 0.027 | 0.069 | 0.64 | 0.53 | 0.75 | 8.35 | 7.96 | 1.476980891 | 9  | 0  | 3.703703704 | 0           |
| MS3_08000 | 0.027 | 0.068 | 0.59 | 0.5  | 0.67 | 8.33 | 8.06 | 1.309964505 | 6  | 0  | 2.469135802 | 0           |
| MS3_10036 | 0.027 | 0.068 | 0.64 | 0.54 | 0.74 | 8.41 | 7.96 | 1.568312299 | 25 | 2  | 10.28806584 | 6.896551724 |
| MS3_03655 | 0.028 | 0.07  | 0.62 | 0.53 | 0.71 | 9.1  | 8.74 | 1.433329433 | 69 | 2  | 28.39506173 | 6.896551724 |
| MS3_05739 | 0.028 | 0.07  | 0.62 | 0.51 | 0.72 | 6.64 | 6.4  | 1.271250488 | 0  | 0  | 0           | 0           |
| MS3_00569 | 0.029 | 0.072 | 0.63 | 0.51 | 0.74 | 8.98 | 8.53 | 1.568312222 | 47 | 2  | 19.34156379 | 6.896551724 |
| MS3_10493 | 0.029 | 0.072 | 0.62 | 0.52 | 0.72 | 8.97 | 9.41 | 0.644036415 | 41 | 5  | 16.87242798 | 17.24137931 |
| MS3_11247 | 0.029 | 0.073 | 0.62 | 0.52 | 0.73 | 8.55 | 8.94 | 0.677056861 | 6  | 2  | 2.469135802 | 6.896551724 |
| MS3_02314 | 0.03  | 0.074 | 0.57 | 0.48 | 0.66 | 9.48 | 9.74 | 0.771051584 | 93 | 12 | 38.27160494 | 41.37931034 |
| MS3_01114 | 0.03  | 0.075 | 0.59 | 0.49 | 0.68 | 7.33 | 7.05 | 1.323130239 | 3  | 0  | 1.234567901 | 0           |

|           |       |       |      |      |      |      |      |             |     |    |             |             |
|-----------|-------|-------|------|------|------|------|------|-------------|-----|----|-------------|-------------|
| MS3_06746 | 0.03  | 0.075 | 0.57 | 0.48 | 0.67 | 9.54 | 9.86 | 0.726149035 | 106 | 13 | 43.62139918 | 44.82758621 |
| MS3_00670 | 0.031 | 0.075 | 0.62 | 0.51 | 0.74 | 8.79 | 8.38 | 1.506817829 | 12  | 1  | 4.938271605 | 3.448275862 |
| MS3_03420 | 0.031 | 0.075 | 0.63 | 0.52 | 0.73 | 9.25 | 8.85 | 1.491824715 | 57  | 3  | 23.45679012 | 10.34482759 |
| MS3_08169 | 0.031 | 0.075 | 0.66 | 0.55 | 0.76 | 8.58 | 9.05 | 0.625002255 | 18  | 2  | 7.407407407 | 6.896551724 |
| MS3_10736 | 0.031 | 0.076 | 0.6  | 0.51 | 0.69 | 8.5  | 8.18 | 1.377127815 | 17  | 0  | 6.995884774 | 0           |
| MS3_04437 | 0.032 | 0.078 | 0.61 | 0.51 | 0.7  | 8.59 | 8.84 | 0.778800772 | 5   | 0  | 2.057613169 | 0           |
| MS3_10475 | 0.032 | 0.077 | 0.62 | 0.53 | 0.71 | 8.72 | 8.45 | 1.309964476 | 14  | 0  | 5.761316872 | 0           |
| MS3_00440 | 0.033 | 0.079 | 0.62 | 0.51 | 0.73 | 7.51 | 7.16 | 1.41906798  | 0   | 0  | 0           | 0           |
| MS3_08811 | 0.033 | 0.079 | 0.63 | 0.53 | 0.74 | 8.49 | 8.16 | 1.390968183 | 5   | 1  | 2.057613169 | 3.448275862 |
| MS3_10022 | 0.033 | 0.079 | 0.62 | 0.52 | 0.73 | 7.8  | 7.52 | 1.323129979 | 0   | 0  | 0           | 0           |
| MS3_01245 | 0.034 | 0.082 | 0.61 | 0.51 | 0.71 | 8.23 | 7.95 | 1.323129883 | 4   | 0  | 1.646090535 | 0           |
| MS3_07422 | 0.034 | 0.081 | 0.65 | 0.52 | 0.77 | 8.5  | 8.91 | 0.663650235 | 9   | 4  | 3.703703704 | 13.79310345 |
| MS3_06296 | 0.035 | 0.084 | 0.65 | 0.55 | 0.76 | 8.58 | 9.05 | 0.625002255 | 21  | 3  | 8.641975309 | 10.34482759 |
| MS3_07370 | 0.035 | 0.084 | 0.6  | 0.5  | 0.7  | 8.34 | 8.6  | 0.771051568 | 3   | 0  | 1.234567901 | 0           |
| MS3_03814 | 0.036 | 0.086 | 0.65 | 0.55 | 0.75 | 8.89 | 9.39 | 0.606530652 | 36  | 6  | 14.81481481 | 20.68965517 |
| MS3_04262 | 0.036 | 0.086 | 0.62 | 0.51 | 0.73 | 8.52 | 8.16 | 1.433329475 | 5   | 0  | 2.057613169 | 0           |
| MS3_06276 | 0.036 | 0.085 | 0.62 | 0.51 | 0.73 | 8.95 | 9.24 | 0.748263562 | 21  | 5  | 8.641975309 | 17.24137931 |
| MS3_07105 | 0.036 | 0.086 | 0.59 | 0.5  | 0.69 | 8.39 | 8.04 | 1.419067623 | 20  | 2  | 8.230452675 | 6.896551724 |
| MS3_07419 | 0.036 | 0.086 | 0.62 | 0.52 | 0.72 | 8.85 | 8.47 | 1.462284624 | 37  | 2  | 15.22633745 | 6.896551724 |
| MS3_00452 | 0.037 | 0.086 | 0.61 | 0.51 | 0.71 | 8.36 | 8.1  | 1.296930135 | 2   | 0  | 0.823045267 | 0           |
| MS3_01870 | 0.037 | 0.086 | 0.6  | 0.5  | 0.7  | 7.7  | 7.35 | 1.419067844 | 4   | 0  | 1.646090535 | 0           |
| MS3_05252 | 0.037 | 0.086 | 0.63 | 0.52 | 0.73 | 8.06 | 8.38 | 0.726149003 | 0   | 0  | 0           | 0           |
| MS3_08726 | 0.037 | 0.086 | 0.57 | 0.46 | 0.68 | 8.03 | 7.68 | 1.419067701 | 11  | 0  | 4.526748971 | 0           |
| MS3_09427 | 0.037 | 0.086 | 0.58 | 0.48 | 0.69 | 7.93 | 7.66 | 1.309964572 | 8   | 0  | 3.29218107  | 0           |
| MS3_00151 | 0.038 | 0.088 | 0.63 | 0.52 | 0.73 | 7.99 | 7.68 | 1.363425249 | 2   | 0  | 0.823045267 | 0           |
| MS3_04227 | 0.038 | 0.089 | 0.64 | 0.53 | 0.75 | 8.75 | 9.07 | 0.726149028 | 17  | 1  | 6.995884774 | 3.448275862 |
| MS3_05734 | 0.038 | 0.088 | 0.62 | 0.49 | 0.75 | 8.07 | 7.61 | 1.584074219 | 2   | 0  | 0.823045267 | 0           |
| MS3_00412 | 0.039 | 0.09  | 0.61 | 0.51 | 0.7  | 8.67 | 8.9  | 0.794533594 | 8   | 1  | 3.29218107  | 3.448275862 |
| MS3_10028 | 0.039 | 0.089 | 0.59 | 0.49 | 0.7  | 8.23 | 7.93 | 1.349858886 | 10  | 0  | 4.115226337 | 0           |
| MS3_02653 | 0.04  | 0.091 | 0.62 | 0.5  | 0.73 | 8.12 | 8.51 | 0.677056842 | 5   | 2  | 2.057613169 | 6.896551724 |
| MS3_03304 | 0.04  | 0.091 | 0.62 | 0.52 | 0.72 | 8.6  | 8.85 | 0.778800773 | 4   | 0  | 1.646090535 | 0           |
| MS3_03768 | 0.04  | 0.091 | 0.63 | 0.52 | 0.73 | 7.42 | 7.87 | 0.637628016 | 7   | 1  | 2.880658436 | 3.448275862 |
| MS3_06299 | 0.04  | 0.091 | 0.6  | 0.5  | 0.7  | 7.6  | 7.33 | 1.309964686 | 1   | 0  | 0.411522634 | 0           |
| MS3_07509 | 0.04  | 0.091 | 0.63 | 0.52 | 0.74 | 8.32 | 8.62 | 0.740818201 | 4   | 1  | 1.646090535 | 3.448275862 |
| MS3_10785 | 0.041 | 0.093 | 0.58 | 0.48 | 0.68 | 6.79 | 6.56 | 1.25860094  | 0   | 0  | 0           | 0           |
| MS3_02474 | 0.042 | 0.095 | 0.63 | 0.51 | 0.75 | 8.65 | 8.92 | 0.763379485 | 4   | 1  | 1.646090535 | 3.448275862 |
| MS3_04887 | 0.042 | 0.095 | 0.65 | 0.53 | 0.76 | 8.22 | 7.68 | 1.716007104 | 27  | 2  | 11.11111111 | 6.896551724 |

|           |       |       |      |      |      |       |       |             |     |    |             |             |
|-----------|-------|-------|------|------|------|-------|-------|-------------|-----|----|-------------|-------------|
| MS3_08692 | 0.042 | 0.096 | 0.61 | 0.5  | 0.71 | 8.96  | 9.41  | 0.637628145 | 55  | 9  | 22.63374486 | 31.03448276 |
| MS3_00447 | 0.043 | 0.096 | 0.61 | 0.49 | 0.73 | 8.93  | 9.21  | 0.755783736 | 20  | 3  | 8.230452675 | 10.34482759 |
| MS3_05352 | 0.043 | 0.096 | 0.59 | 0.48 | 0.69 | 8.61  | 9.02  | 0.663650238 | 33  | 6  | 13.58024691 | 20.68965517 |
| MS3_08472 | 0.043 | 0.096 | 0.56 | 0.46 | 0.66 | 9.33  | 9.62  | 0.748263565 | 88  | 10 | 36.21399177 | 34.48275862 |
| MS3_04342 | 0.044 | 0.098 | 0.56 | 0.47 | 0.65 | 8.77  | 9.11  | 0.711770314 | 35  | 2  | 14.40329218 | 6.896551724 |
| MS3_06832 | 0.044 | 0.099 | 0.61 | 0.5  | 0.72 | 8.16  | 7.82  | 1.404947702 | 7   | 0  | 2.880658436 | 0           |
| MS3_10177 | 0.044 | 0.097 | 0.6  | 0.5  | 0.71 | 8.19  | 7.92  | 1.309964523 | 2   | 0  | 0.823045267 | 0           |
| MS3_11059 | 0.045 | 0.099 | 0.7  | 0.59 | 0.8  | 9.28  | 9.76  | 0.618783388 | 82  | 18 | 33.74485597 | 62.06896552 |
| MS3_03400 | 0.047 | 0.1   | 0.58 | 0.49 | 0.68 | 8.71  | 8.89  | 0.835270205 | 3   | 0  | 1.234567901 | 0           |
| MS3_06500 | 0.047 | 0.1   | 0.63 | 0.52 | 0.73 | 8.18  | 7.9   | 1.32312989  | 2   | 0  | 0.823045267 | 0           |
| MS3_07481 | 0.047 | 0.1   | 0.57 | 0.47 | 0.66 | 9.9   | 9.29  | 1.84043141  | 122 | 10 | 50.20576132 | 34.48275862 |
| MS3_01483 | 0.048 | 0.11  | 0.6  | 0.51 | 0.69 | 8.59  | 8.84  | 0.778800772 | 6   | 0  | 2.469135802 | 0           |
| MS3_06380 | 0.048 | 0.1   | 0.65 | 0.53 | 0.76 | 8.65  | 8.23  | 1.521961617 | 18  | 1  | 7.407407407 | 3.448275862 |
| MS3_08945 | 0.049 | 0.11  | 0.65 | 0.55 | 0.74 | 9.05  | 9.5   | 0.637628146 | 64  | 10 | 26.33744856 | 34.48275862 |
| MS3_09510 | 0.049 | 0.11  | 0.57 | 0.47 | 0.66 | 8.79  | 9.12  | 0.718923725 | 29  | 3  | 11.93415638 | 10.34482759 |
| MS3_01833 | 0.05  | 0.11  | 0.57 | 0.48 | 0.65 | 9.13  | 9.41  | 0.755783738 | 51  | 1  | 20.98765432 | 3.448275862 |
| MS3_01871 | 0.05  | 0.11  | 0.62 | 0.49 | 0.74 | 8.43  | 8.05  | 1.462284669 | 9   | 0  | 3.703703704 | 0           |
| MS3_07600 | 0.05  | 0.11  | 0.6  | 0.5  | 0.7  | 8.36  | 8.63  | 0.763379477 | 1   | 1  | 0.411522634 | 3.448275862 |
| MS3_06748 | 0.051 | 0.11  | 0.67 | 0.58 | 0.77 | 9.19  | 9.77  | 0.559898363 | 57  | 10 | 23.45679012 | 34.48275862 |
| MS3_06914 | 0.051 | 0.11  | 0.6  | 0.49 | 0.7  | 6.85  | 6.61  | 1.271250029 | 0   | 0  | 0           | 0           |
| MS3_03427 | 0.052 | 0.11  | 0.64 | 0.53 | 0.75 | 8.43  | 8.84  | 0.663650232 | 5   | 0  | 2.057613169 | 0           |
| MS3_01053 | 0.053 | 0.11  | 0.59 | 0.49 | 0.68 | 7.73  | 7.44  | 1.336427691 | 1   | 0  | 0.411522634 | 0           |
| MS3_00812 | 0.054 | 0.12  | 0.58 | 0.48 | 0.68 | 9.34  | 9.6   | 0.771051583 | 74  | 9  | 30.4526749  | 31.03448276 |
| MS3_02256 | 0.054 | 0.12  | 0.64 | 0.52 | 0.76 | 8.73  | 9.05  | 0.726149028 | 9   | 3  | 3.703703704 | 10.34482759 |
| MS3_09229 | 0.055 | 0.12  | 0.6  | 0.49 | 0.71 | 9.12  | 8.81  | 1.363425128 | 37  | 1  | 15.22633745 | 3.448275862 |
| MS3_09415 | 0.055 | 0.12  | 0.67 | 0.57 | 0.78 | 8.22  | 7.84  | 1.46228471  | 7   | 1  | 2.880658436 | 3.448275862 |
| MS3_06327 | 0.057 | 0.12  | 0.59 | 0.48 | 0.7  | 6.86  | 6.59  | 1.309965483 | 1   | 0  | 0.411522634 | 0           |
| MS3_08593 | 0.059 | 0.13  | 0.62 | 0.51 | 0.72 | 6.83  | 7.43  | 0.548811188 | 5   | 2  | 2.057613169 | 6.896551724 |
| MS3_09426 | 0.059 | 0.13  | 0.61 | 0.5  | 0.72 | 6.72  | 7.08  | 0.697675805 | 1   | 0  | 0.411522634 | 0           |
| MS3_06950 | 0.061 | 0.13  | 0.66 | 0.54 | 0.78 | 8.1   | 7.74  | 1.433329554 | 5   | 1  | 2.057613169 | 3.448275862 |
| MS3_00076 | 0.062 | 0.13  | 0.6  | 0.5  | 0.7  | 8.43  | 8.66  | 0.794533589 | 2   | 0  | 0.823045267 | 0           |
| MS3_06736 | 0.062 | 0.13  | 0.62 | 0.5  | 0.74 | 8.65  | 8.94  | 0.748263557 | 4   | 1  | 1.646090535 | 3.448275862 |
| MS3_07686 | 0.064 | 0.13  | 0.61 | 0.51 | 0.7  | 9.55  | 9.85  | 0.740818219 | 106 | 13 | 43.62139918 | 44.82758621 |
| MS3_00676 | 0.066 | 0.14  | 0.59 | 0.48 | 0.69 | 7.55  | 7.28  | 1.30996471  | 2   | 0  | 0.823045267 | 0           |
| MS3_08220 | 0.066 | 0.14  | 0.58 | 0.48 | 0.69 | 10.19 | 10.61 | 0.657046819 | 186 | 22 | 76.54320988 | 75.86206897 |
| MS3_11045 | 0.066 | 0.14  | 0.6  | 0.49 | 0.71 | 6.96  | 7.4   | 0.644036082 | 2   | 1  | 0.823045267 | 3.448275862 |
| MS3_10148 | 0.067 | 0.14  | 0.6  | 0.49 | 0.7  | 8.55  | 8.81  | 0.771051574 | 8   | 0  | 3.29218107  | 0           |

|           |       |      |      |      |      |       |       |             |     |    |             |             |
|-----------|-------|------|------|------|------|-------|-------|-------------|-----|----|-------------|-------------|
| MS3_01333 | 0.067 | 0.14 | 0.64 | 0.52 | 0.76 | 6.8   | 6.49  | 1.363426567 | 1   | 0  | 0.411522634 | 0           |
| MS3_09744 | 0.067 | 0.14 | 0.62 | 0.52 | 0.72 | 10.24 | 9.53  | 2.033991267 | 174 | 16 | 71.60493827 | 55.17241379 |
| MS3_01749 | 0.069 | 0.14 | 0.58 | 0.46 | 0.7  | 10.65 | 10.06 | 1.803988418 | 192 | 19 | 79.01234568 | 65.51724138 |
| MS3_05077 | 0.07  | 0.14 | 0.56 | 0.45 | 0.68 | 9.33  | 8.9   | 1.53725754  | 58  | 5  | 23.86831276 | 17.24137931 |
| MS3_05715 | 0.071 | 0.15 | 0.61 | 0.49 | 0.72 | 8.39  | 8     | 1.476980884 | 16  | 1  | 6.58436214  | 3.448275862 |
| MS3_09296 | 0.071 | 0.15 | 0.61 | 0.5  | 0.72 | 9.33  | 9.66  | 0.718923731 | 65  | 12 | 26.74897119 | 41.37931034 |
| MS3_00147 | 0.072 | 0.15 | 0.58 | 0.49 | 0.67 | 8.31  | 8.52  | 0.810584229 | 4   | 0  | 1.646090535 | 0           |
| MS3_00148 | 0.072 | 0.15 | 0.57 | 0.47 | 0.67 | 10.04 | 10.31 | 0.763379494 | 160 | 18 | 65.8436214  | 62.06896552 |
| MS3_04550 | 0.072 | 0.15 | 0.56 | 0.46 | 0.66 | 7.59  | 7.4   | 1.20924974  | 1   | 0  | 0.411522634 | 0           |
| MS3_09287 | 0.072 | 0.15 | 0.59 | 0.48 | 0.69 | 9.08  | 8.79  | 1.336427502 | 40  | 2  | 16.46090535 | 6.896551724 |
| MS3_08926 | 0.073 | 0.15 | 0.64 | 0.54 | 0.74 | 8.92  | 9.3   | 0.683861403 | 47  | 5  | 19.34156379 | 17.24137931 |
| MS3_01289 | 0.074 | 0.15 | 0.56 | 0.45 | 0.67 | 9.62  | 9.82  | 0.818730752 | 103 | 13 | 42.38683128 | 44.82758621 |
| MS3_08625 | 0.076 | 0.15 | 0.61 | 0.5  | 0.72 | 7.41  | 7.11  | 1.349859214 | 1   | 0  | 0.411522634 | 0           |
| MS3_10292 | 0.076 | 0.15 | 0.61 | 0.5  | 0.73 | 8.32  | 8.63  | 0.733446936 | 7   | 2  | 2.880658436 | 6.896551724 |
| MS3_01014 | 0.077 | 0.15 | 0.61 | 0.5  | 0.71 | 7.33  | 7.77  | 0.644036259 | 6   | 1  | 2.469135802 | 3.448275862 |
| MS3_08178 | 0.077 | 0.16 | 0.58 | 0.47 | 0.68 | 7.82  | 7.6   | 1.246076842 | 5   | 0  | 2.057613169 | 0           |
| MS3_06075 | 0.078 | 0.16 | 0.58 | 0.48 | 0.69 | 8.59  | 8.81  | 0.802518788 | 4   | 1  | 1.646090535 | 3.448275862 |
| MS3_03461 | 0.079 | 0.16 | 0.65 | 0.53 | 0.77 | 8.63  | 9.12  | 0.612626382 | 18  | 6  | 7.407407407 | 20.68965517 |
| MS3_08509 | 0.079 | 0.16 | 0.62 | 0.51 | 0.73 | 6.49  | 6.86  | 0.690733498 | 2   | 0  | 0.823045267 | 0           |
| MS3_03054 | 0.084 | 0.17 | 0.6  | 0.48 | 0.71 | 8.82  | 8.52  | 1.349858832 | 13  | 0  | 5.349794239 | 0           |
| MS3_03385 | 0.085 | 0.17 | 0.61 | 0.5  | 0.72 | 8.22  | 8.47  | 0.778800761 | 5   | 0  | 2.057613169 | 0           |
| MS3_06080 | 0.085 | 0.17 | 0.58 | 0.47 | 0.7  | 8.58  | 8.28  | 1.349858847 | 12  | 0  | 4.938271605 | 0           |
| MS3_08024 | 0.085 | 0.17 | 0.6  | 0.49 | 0.7  | 8.39  | 8.04  | 1.419067623 | 21  | 2  | 8.641975309 | 6.896551724 |
| MS3_08907 | 0.086 | 0.17 | 0.57 | 0.46 | 0.67 | 7.13  | 6.92  | 1.233678473 | 1   | 0  | 0.411522634 | 0           |
| MS3_02494 | 0.087 | 0.17 | 0.57 | 0.46 | 0.67 | 7.55  | 7.32  | 1.258600213 | 6   | 0  | 2.469135802 | 0           |
| MS3_10209 | 0.087 | 0.17 | 0.64 | 0.55 | 0.74 | 9.14  | 9.52  | 0.683861405 | 68  | 9  | 27.98353909 | 31.03448276 |
| MS3_00143 | 0.088 | 0.17 | 0.63 | 0.51 | 0.74 | 8.63  | 8.91  | 0.755783731 | 5   | 2  | 2.057613169 | 6.896551724 |
| MS3_00703 | 0.089 | 0.17 | 0.57 | 0.47 | 0.67 | 7.67  | 7.42  | 1.284025598 | 2   | 0  | 0.823045267 | 0           |
| MS3_07467 | 0.09  | 0.18 | 0.5  | 0.41 | 0.59 | 9.5   | 9.72  | 0.802518796 | 115 | 11 | 47.32510288 | 37.93103448 |
| MS3_04063 | 0.091 | 0.18 | 0.59 | 0.47 | 0.71 | 8.51  | 9.08  | 0.565525423 | 34  | 7  | 13.99176955 | 24.13793103 |
| MS3_07403 | 0.092 | 0.18 | 0.48 | 0.39 | 0.57 | 6.34  | 6.19  | 1.161835508 | 0   | 0  | 0           | 0           |
| MS3_00257 | 0.093 | 0.18 | 0.6  | 0.49 | 0.7  | 8.25  | 8.59  | 0.711770299 | 2   | 1  | 0.823045267 | 3.448275862 |
| MS3_03534 | 0.094 | 0.18 | 0.59 | 0.47 | 0.71 | 8.86  | 8.58  | 1.323129832 | 17  | 2  | 6.995884774 | 6.896551724 |
| MS3_05748 | 0.094 | 0.18 | 0.6  | 0.49 | 0.71 | 8.74  | 8.98  | 0.786627853 | 14  | 1  | 5.761316872 | 3.448275862 |
| MS3_02637 | 0.096 | 0.19 | 0.61 | 0.5  | 0.71 | 9.06  | 9.43  | 0.690734326 | 64  | 9  | 26.33744856 | 31.03448276 |
| MS3_02838 | 0.097 | 0.19 | 0.58 | 0.47 | 0.69 | 8.84  | 9.09  | 0.778800777 | 20  | 3  | 8.230452675 | 10.34482759 |
| MS3_04800 | 0.097 | 0.19 | 0.59 | 0.49 | 0.69 | 8.49  | 8.86  | 0.690734315 | 21  | 1  | 8.641975309 | 3.448275862 |

|           |       |      |      |      |      |       |       |             |     |    |             |             |
|-----------|-------|------|------|------|------|-------|-------|-------------|-----|----|-------------|-------------|
| MS3_05337 | 0.097 | 0.19 | 0.59 | 0.47 | 0.71 | 8.36  | 8.02  | 1.404947666 | 13  | 1  | 5.349794239 | 3.448275862 |
| MS3_10803 | 0.097 | 0.19 | 0.58 | 0.48 | 0.67 | 9.7   | 9.94  | 0.78662786  | 113 | 14 | 46.50205761 | 48.27586207 |
| MS3_07737 | 0.098 | 0.19 | 0.51 | 0.42 | 0.61 | 9.68  | 9.95  | 0.763379493 | 135 | 14 | 55.55555556 | 48.27586207 |
| MS3_02155 | 0.098 | 0.19 | 0.59 | 0.5  | 0.67 | 7.93  | 8.11  | 0.835270179 | 4   | 0  | 1.646090535 | 0           |
| MS3_03625 | 0.098 | 0.19 | 0.59 | 0.48 | 0.71 | 8.14  | 8.42  | 0.755783714 | 1   | 1  | 0.411522634 | 3.448275862 |
| MS3_04778 | 0.098 | 0.19 | 0.59 | 0.49 | 0.69 | 8.46  | 8.81  | 0.704688074 | 14  | 2  | 5.761316872 | 6.896551724 |
| MS3_07273 | 0.098 | 0.19 | 0.56 | 0.46 | 0.66 | 8.67  | 8.37  | 1.34985884  | 22  | 1  | 9.053497942 | 3.448275862 |
| MS3_09231 | 0.099 | 0.19 | 0.62 | 0.5  | 0.73 | 8.51  | 8.77  | 0.771051573 | 8   | 0  | 3.29218107  | 0           |
| MS3_10187 | 0.099 | 0.19 | 0.6  | 0.51 | 0.68 | 9.85  | 9.5   | 1.419067553 | 139 | 10 | 57.20164609 | 34.48275862 |
| MS3_00287 | 0.1   | 0.19 | 0.56 | 0.47 | 0.66 | 8.09  | 7.88  | 1.23367812  | 4   | 0  | 1.646090535 | 0           |
| MS3_04307 | 0.1   | 0.19 | 0.5  | 0.42 | 0.58 | 9.82  | 9.51  | 1.363425118 | 99  | 6  | 40.74074074 | 20.68965517 |
| MS3_06745 | 0.1   | 0.19 | 0.6  | 0.51 | 0.69 | 8.91  | 9.11  | 0.818730748 | 30  | 2  | 12.34567901 | 6.896551724 |
| MS3_08999 | 0.1   | 0.2  | 0.57 | 0.46 | 0.67 | 8.98  | 8.71  | 1.309964466 | 32  | 2  | 13.16872428 | 6.896551724 |
| MS3_10713 | 0.1   | 0.19 | 0.55 | 0.48 | 0.63 | 9.92  | 9.71  | 1.233678062 | 117 | 6  | 48.14814815 | 20.68965517 |
| MS3_11509 | 0.1   | 0.19 | 0.6  | 0.49 | 0.71 | 8.58  | 8.83  | 0.778800772 | 7   | 1  | 2.880658436 | 3.448275862 |
| MS3_00881 | 0.11  | 0.21 | 0.59 | 0.49 | 0.7  | 8.51  | 8.84  | 0.718923719 | 15  | 3  | 6.172839506 | 10.34482759 |
| MS3_01328 | 0.11  | 0.21 | 0.54 | 0.43 | 0.64 | 9.73  | 9.94  | 0.810584245 | 137 | 16 | 56.37860082 | 55.17241379 |
| MS3_01527 | 0.11  | 0.2  | 0.57 | 0.47 | 0.67 | 8.82  | 9.08  | 0.771051579 | 20  | 1  | 8.230452675 | 3.448275862 |
| MS3_01764 | 0.11  | 0.2  | 0.54 | 0.44 | 0.63 | 10.18 | 10.57 | 0.677056874 | 170 | 20 | 69.95884774 | 68.96551724 |
| MS3_04179 | 0.11  | 0.2  | 0.59 | 0.49 | 0.68 | 8.85  | 8.7   | 1.161834251 | 6   | 0  | 2.469135802 | 0           |
| MS3_08663 | 0.11  | 0.21 | 0.54 | 0.44 | 0.65 | 8.63  | 8.38  | 1.284025443 | 21  | 0  | 8.641975309 | 0           |
| MS3_09396 | 0.11  | 0.2  | 0.62 | 0.5  | 0.74 | 8.49  | 8.78  | 0.748263554 | 4   | 2  | 1.646090535 | 6.896551724 |
| MS3_00785 | 0.12  | 0.22 | 0.55 | 0.46 | 0.65 | 9.43  | 9.66  | 0.794533601 | 88  | 11 | 36.21399177 | 37.93103448 |
| MS3_01160 | 0.12  | 0.22 | 0.57 | 0.46 | 0.69 | 8.27  | 7.96  | 1.363425191 | 22  | 0  | 9.053497942 | 0           |
| MS3_01937 | 0.12  | 0.21 | 0.6  | 0.48 | 0.73 | 8.64  | 8.94  | 0.74081821  | 15  | 3  | 6.172839506 | 10.34482759 |
| MS3_04453 | 0.12  | 0.22 | 0.57 | 0.48 | 0.66 | 8.57  | 8.35  | 1.246076755 | 22  | 0  | 9.053497942 | 0           |
| MS3_04564 | 0.12  | 0.22 | 0.63 | 0.5  | 0.76 | 7.01  | 6.72  | 1.336428344 | 1   | 0  | 0.411522634 | 0           |
| MS3_05024 | 0.12  | 0.21 | 0.62 | 0.5  | 0.73 | 8.2   | 7.86  | 1.404947694 | 7   | 1  | 2.880658436 | 3.448275862 |
| MS3_05038 | 0.12  | 0.22 | 0.64 | 0.53 | 0.75 | 9.05  | 9.39  | 0.711770318 | 48  | 9  | 19.75308642 | 31.03448276 |
| MS3_06449 | 0.12  | 0.22 | 0.57 | 0.47 | 0.67 | 8.44  | 8.22  | 1.246076763 | 10  | 0  | 4.115226337 | 0           |
| MS3_08613 | 0.12  | 0.22 | 0.61 | 0.49 | 0.73 | 8.97  | 9.22  | 0.778800778 | 23  | 4  | 9.465020576 | 13.79310345 |
| MS3_10459 | 0.12  | 0.22 | 0.54 | 0.44 | 0.63 | 8.64  | 8.42  | 1.246076752 | 25  | 0  | 10.28806584 | 0           |
| MS3_10943 | 0.12  | 0.22 | 0.52 | 0.43 | 0.62 | 7.97  | 7.74  | 1.258600098 | 8   | 0  | 3.29218107  | 0           |
| MS3_01274 | 0.13  | 0.23 | 0.58 | 0.47 | 0.69 | 8.29  | 8.07  | 1.246076774 | 1   | 0  | 0.411522634 | 0           |
| MS3_06424 | 0.13  | 0.24 | 0.62 | 0.48 | 0.75 | 8.82  | 9.09  | 0.763379487 | 12  | 4  | 4.938271605 | 13.79310345 |
| MS3_06482 | 0.13  | 0.23 | 0.67 | 0.56 | 0.78 | 9.05  | 9.38  | 0.718923729 | 31  | 9  | 12.75720165 | 31.03448276 |
| MS3_07854 | 0.13  | 0.24 | 0.59 | 0.48 | 0.7  | 7.98  | 8.32  | 0.711770282 | 1   | 1  | 0.411522634 | 3.448275862 |

|           |      |      |      |      |      |       |      |             |     |    |             |             |
|-----------|------|------|------|------|------|-------|------|-------------|-----|----|-------------|-------------|
| MS3_09619 | 0.13 | 0.23 | 0.48 | 0.39 | 0.57 | 9.17  | 9.44 | 0.763379491 | 69  | 6  | 28.39506173 | 20.68965517 |
| MS3_10499 | 0.13 | 0.23 | 0.57 | 0.46 | 0.67 | 8.7   | 8.86 | 0.852143782 | 2   | 0  | 0.823045267 | 0           |
| MS3_10687 | 0.13 | 0.23 | 0.59 | 0.48 | 0.7  | 8.73  | 9.02 | 0.748263559 | 14  | 2  | 5.761316872 | 6.896551724 |
| MS3_00494 | 0.14 | 0.24 | 0.68 | 0.57 | 0.79 | 7.26  | 6.9  | 1.433330162 | 1   | 1  | 0.411522634 | 3.448275862 |
| MS3_00769 | 0.14 | 0.24 | 0.59 | 0.48 | 0.7  | 8.17  | 8.41 | 0.786627837 | 3   | 1  | 1.234567901 | 3.448275862 |
| MS3_00939 | 0.14 | 0.25 | 0.55 | 0.45 | 0.66 | 7.33  | 7.15 | 1.197217586 | 0   | 0  | 0           | 0           |
| MS3_06583 | 0.14 | 0.25 | 0.53 | 0.43 | 0.63 | 9.15  | 9.35 | 0.81873075  | 49  | 4  | 20.16460905 | 13.79310345 |
| MS3_07487 | 0.14 | 0.26 | 0.6  | 0.49 | 0.7  | 8.25  | 8.45 | 0.818730735 | 4   | 0  | 1.646090535 | 0           |
| MS3_08004 | 0.14 | 0.24 | 0.62 | 0.52 | 0.72 | 9.03  | 9.35 | 0.726149032 | 52  | 7  | 21.39917695 | 24.13793103 |
| No hits   | 0.14 | 0.25 | 0.58 | 0.47 | 0.7  | 8.14  | 7.85 | 1.336427577 | 6   | 0  | 2.469135802 | 0           |
| MS3_08460 | 0.15 | 0.27 | 0.57 | 0.49 | 0.66 | 9.62  | 9.33 | 1.336427493 | 84  | 4  | 34.56790123 | 13.79310345 |
| MS3_01934 | 0.15 | 0.27 | 0.58 | 0.48 | 0.67 | 7.02  | 6.8  | 1.246077281 | 1   | 0  | 0.411522634 | 0           |
| MS3_02050 | 0.15 | 0.27 | 0.58 | 0.47 | 0.69 | 8.36  | 8.61 | 0.778800766 | 7   | 2  | 2.880658436 | 6.896551724 |
| MS3_05322 | 0.15 | 0.27 | 0.61 | 0.49 | 0.72 | 8.3   | 8.51 | 0.810584229 | 0   | 0  | 0           | 0           |
| MS3_08210 | 0.15 | 0.27 | 0.56 | 0.47 | 0.65 | 8.08  | 7.93 | 1.161834282 | 0   | 0  | 0           | 0           |
| MS3_08455 | 0.15 | 0.26 | 0.59 | 0.47 | 0.7  | 8.49  | 8.15 | 1.404947648 | 34  | 3  | 13.99176955 | 10.34482759 |
| MS3_03171 | 0.16 | 0.28 | 0.59 | 0.48 | 0.69 | 8.41  | 8.65 | 0.786627846 | 10  | 1  | 4.115226337 | 3.448275862 |
| MS3_06707 | 0.16 | 0.29 | 0.59 | 0.46 | 0.72 | 8.23  | 8.53 | 0.740818197 | 4   | 2  | 1.646090535 | 6.896551724 |
| MS3_08176 | 0.16 | 0.27 | 0.55 | 0.46 | 0.64 | 8.4   | 8.23 | 1.185304876 | 11  | 0  | 4.526748971 | 0           |
| MS3_09457 | 0.16 | 0.28 | 0.59 | 0.48 | 0.7  | 8.31  | 8.03 | 1.323129872 | 19  | 2  | 7.818930041 | 6.896551724 |
| MS3_02805 | 0.17 | 0.29 | 0.58 | 0.47 | 0.7  | 8.67  | 8.95 | 0.755783732 | 27  | 5  | 11.11111111 | 17.24137931 |
| MS3_03569 | 0.17 | 0.29 | 0.58 | 0.47 | 0.68 | 8.15  | 8.38 | 0.794533578 | 6   | 0  | 2.469135802 | 0           |
| MS3_03976 | 0.17 | 0.29 | 0.59 | 0.48 | 0.69 | 7.93  | 8.26 | 0.718923688 | 21  | 0  | 8.641975309 | 0           |
| MS3_05602 | 0.17 | 0.29 | 0.59 | 0.48 | 0.7  | 7.86  | 8.09 | 0.794533559 | 0   | 0  | 0           | 0           |
| MS3_06161 | 0.17 | 0.29 | 0.6  | 0.5  | 0.7  | 9.26  | 9.45 | 0.826959132 | 56  | 6  | 23.04526749 | 20.68965517 |
| MS3_07156 | 0.17 | 0.29 | 0.54 | 0.43 | 0.65 | 6.93  | 6.72 | 1.233678676 | 4   | 0  | 1.646090535 | 0           |
| MS3_07395 | 0.17 | 0.29 | 0.59 | 0.48 | 0.7  | 8.99  | 8.74 | 1.28402543  | 43  | 4  | 17.69547325 | 13.79310345 |
| MS3_10721 | 0.17 | 0.3  | 0.56 | 0.45 | 0.66 | 8.9   | 8.68 | 1.246076743 | 28  | 2  | 11.52263374 | 6.896551724 |
| MS3_04347 | 0.18 | 0.3  | 0.57 | 0.46 | 0.68 | 9.49  | 9.22 | 1.309964456 | 81  | 8  | 33.33333333 | 27.5862069  |
| MS3_05960 | 0.18 | 0.3  | 0.49 | 0.4  | 0.57 | 10.11 | 9.89 | 1.246076732 | 137 | 15 | 56.37860082 | 51.72413793 |
| MS3_07593 | 0.18 | 0.31 | 0.54 | 0.44 | 0.64 | 9.63  | 9.82 | 0.826959133 | 113 | 13 | 46.50205761 | 44.82758621 |
| MS3_09000 | 0.18 | 0.31 | 0.56 | 0.45 | 0.66 | 9.35  | 9.12 | 1.258600015 | 71  | 5  | 29.218107   | 17.24137931 |
| MS3_09626 | 0.18 | 0.31 | 0.57 | 0.46 | 0.68 | 8.63  | 8.42 | 1.233678081 | 5   | 0  | 2.057613169 | 0           |
| MS3_10471 | 0.18 | 0.31 | 0.58 | 0.46 | 0.7  | 8.55  | 8.32 | 1.258600037 | 6   | 0  | 2.469135802 | 0           |
| MS3_10847 | 0.19 | 0.32 | 0.62 | 0.53 | 0.71 | 9.01  | 9.28 | 0.76337949  | 49  | 6  | 20.16460905 | 20.68965517 |
| MS3_02538 | 0.19 | 0.31 | 0.45 | 0.33 | 0.56 | 8.16  | 7.94 | 1.246076787 | 3   | 0  | 1.234567901 | 0           |
| MS3_04269 | 0.19 | 0.31 | 0.58 | 0.45 | 0.71 | 8.94  | 9.15 | 0.810584241 | 19  | 5  | 7.818930041 | 17.24137931 |



|           |      |      |      |      |      |       |      |             |     |    |             |             |
|-----------|------|------|------|------|------|-------|------|-------------|-----|----|-------------|-------------|
| MS3_06947 | 0.19 | 0.32 | 0.57 | 0.46 | 0.68 | 8.61  | 8.78 | 0.843664809 | 8   | 1  | 3.29218107  | 3.448275862 |
| MS3_08391 | 0.19 | 0.31 | 0.57 | 0.46 | 0.68 | 8.31  | 8.55 | 0.786627843 | 14  | 2  | 5.761316872 | 6.896551724 |
| MS3_10378 | 0.19 | 0.31 | 0.44 | 0.34 | 0.55 | 8.2   | 7.98 | 1.246076783 | 3   | 0  | 1.234567901 | 0           |
| MS3_10619 | 0.19 | 0.31 | 0.59 | 0.47 | 0.7  | 8.6   | 8.93 | 0.718923722 | 37  | 7  | 15.22633745 | 24.13793103 |
| MS3_01504 | 0.2  | 0.33 | 0.57 | 0.45 | 0.68 | 8.55  | 8.32 | 1.258600037 | 26  | 2  | 10.69958848 | 6.896551724 |
| MS3_02162 | 0.2  | 0.33 | 0.57 | 0.46 | 0.68 | 8.88  | 9.07 | 0.826959129 | 19  | 2  | 7.818930041 | 6.896551724 |
| MS3_02499 | 0.2  | 0.33 | 0.56 | 0.46 | 0.66 | 8.53  | 8.71 | 0.835270202 | 8   | 1  | 3.29218107  | 3.448275862 |
| MS3_03381 | 0.2  | 0.34 | 0.58 | 0.47 | 0.7  | 8.23  | 8.45 | 0.802518778 | 3   | 0  | 1.234567901 | 0           |
| MS3_05289 | 0.2  | 0.33 | 0.55 | 0.45 | 0.65 | 8.72  | 8.53 | 1.209249613 | 27  | 1  | 11.11111111 | 3.448275862 |
| MS3_06430 | 0.2  | 0.33 | 0.58 | 0.47 | 0.68 | 8.2   | 8    | 1.221402803 | 2   | 0  | 0.823045267 | 0           |
| MS3_08727 | 0.2  | 0.33 | 0.6  | 0.49 | 0.7  | 7.44  | 7.16 | 1.323130155 | 6   | 1  | 2.469135802 | 3.448275862 |
| MS3_00178 | 0.21 | 0.34 | 0.56 | 0.46 | 0.66 | 8.27  | 8.12 | 1.161834269 | 3   | 0  | 1.234567901 | 0           |
| MS3_05910 | 0.21 | 0.34 | 0.57 | 0.44 | 0.69 | 7.84  | 8.09 | 0.778800736 | 1   | 1  | 0.411522634 | 3.448275862 |
| MS3_05976 | 0.21 | 0.34 | 0.57 | 0.45 | 0.68 | 7.18  | 7.38 | 0.818730596 | 0   | 0  | 0           | 0           |
| MS3_07061 | 0.21 | 0.35 | 0.56 | 0.45 | 0.67 | 8.06  | 7.88 | 1.197217415 | 5   | 0  | 2.057613169 | 0           |
| MS3_07799 | 0.21 | 0.34 | 0.56 | 0.45 | 0.67 | 8.63  | 8.79 | 0.852143782 | 3   | 0  | 1.234567901 | 0           |
| MS3_09271 | 0.21 | 0.35 | 0.59 | 0.49 | 0.7  | 6.75  | 6.99 | 0.78662745  | 1   | 0  | 0.411522634 | 0           |
| MS3_00047 | 0.22 | 0.35 | 0.58 | 0.48 | 0.68 | 9.29  | 9.55 | 0.771051583 | 80  | 9  | 32.9218107  | 31.03448276 |
| MS3_01313 | 0.22 | 0.36 | 0.47 | 0.34 | 0.6  | 9.48  | 9.21 | 1.309964456 | 77  | 9  | 31.6872428  | 31.03448276 |
| MS3_02087 | 0.22 | 0.35 | 0.63 | 0.54 | 0.73 | 8.89  | 9.05 | 0.852143785 | 20  | 0  | 8.230452675 | 0           |
| MS3_02804 | 0.22 | 0.36 | 0.56 | 0.47 | 0.66 | 9.69  | 9.52 | 1.185304853 | 94  | 5  | 38.68312757 | 17.24137931 |
| MS3_05226 | 0.22 | 0.36 | 0.52 | 0.43 | 0.62 | 8.47  | 8.29 | 1.197217386 | 10  | 0  | 4.115226337 | 0           |
| MS3_09846 | 0.22 | 0.36 | 0.64 | 0.52 | 0.76 | 8.55  | 8.87 | 0.726149024 | 16  | 4  | 6.58436214  | 13.79310345 |
| MS3_01558 | 0.23 | 0.36 | 0.57 | 0.46 | 0.68 | 6.87  | 7.07 | 0.818730462 | 1   | 0  | 0.411522634 | 0           |
| MS3_01636 | 0.23 | 0.37 | 0.59 | 0.47 | 0.71 | 7.81  | 7.58 | 1.258600131 | 6   | 1  | 2.469135802 | 3.448275862 |
| MS3_02758 | 0.23 | 0.36 | 0.57 | 0.48 | 0.67 | 8.7   | 8.88 | 0.835270204 | 20  | 1  | 8.230452675 | 3.448275862 |
| MS3_03091 | 0.23 | 0.36 | 0.54 | 0.44 | 0.64 | 8.45  | 8.27 | 1.197217387 | 11  | 0  | 4.526748971 | 0           |
| MS3_05911 | 0.23 | 0.37 | 0.6  | 0.5  | 0.71 | 9.13  | 9.38 | 0.778800779 | 53  | 9  | 21.81069959 | 31.03448276 |
| MS3_06223 | 0.23 | 0.37 | 0.56 | 0.45 | 0.66 | 6.62  | 6.46 | 1.173511658 | 0   | 0  | 0           | 0           |
| MS3_08361 | 0.23 | 0.37 | 0.48 | 0.39 | 0.57 | 8.81  | 9    | 0.826959128 | 22  | 0  | 9.053497942 | 0           |
| MS3_09634 | 0.23 | 0.37 | 0.56 | 0.45 | 0.67 | 8.57  | 8.73 | 0.852143781 | 1   | 1  | 0.411522634 | 3.448275862 |
| MS3_10225 | 0.23 | 0.37 | 0.54 | 0.44 | 0.65 | 9.76  | 9.93 | 0.843664816 | 143 | 17 | 58.84773663 | 58.62068966 |
| MS3_00066 | 0.24 | 0.38 | 0.58 | 0.45 | 0.7  | 8.4   | 8.6  | 0.818730739 | 5   | 2  | 2.057613169 | 6.896551724 |
| MS3_01542 | 0.24 | 0.38 | 0.55 | 0.45 | 0.66 | 10.03 | 10.2 | 0.843664816 | 171 | 20 | 70.37037037 | 68.96551724 |
| MS3_03429 | 0.24 | 0.38 | 0.46 | 0.36 | 0.57 | 9.01  | 8.72 | 1.336427504 | 64  | 3  | 26.33744856 | 10.34482759 |
| MS3_06101 | 0.24 | 0.37 | 0.57 | 0.46 | 0.68 | 8.71  | 8.88 | 0.84366481  | 11  | 3  | 4.526748971 | 10.34482759 |
| MS3_06471 | 0.24 | 0.38 | 0.61 | 0.5  | 0.72 | 8.67  | 8.86 | 0.826959126 | 12  | 0  | 4.938271605 | 0           |

|           |      |      |      |      |      |       |       |             |     |    |             |             |
|-----------|------|------|------|------|------|-------|-------|-------------|-----|----|-------------|-------------|
| MS3_08450 | 0.24 | 0.38 | 0.58 | 0.48 | 0.68 | 8.96  | 8.68  | 1.323129829 | 39  | 1  | 16.04938272 | 3.448275862 |
| MS3_09283 | 0.24 | 0.37 | 0.57 | 0.46 | 0.68 | 8.05  | 8.21  | 0.852143765 | 1   | 0  | 0.411522634 | 0           |
| MS3_02641 | 0.25 | 0.39 | 0.55 | 0.44 | 0.66 | 8.51  | 8.34  | 1.185304871 | 6   | 0  | 2.469135802 | 0           |
| MS3_05026 | 0.25 | 0.39 | 0.51 | 0.4  | 0.62 | 9.6   | 9.74  | 0.869358234 | 103 | 10 | 42.38683128 | 34.48275862 |
| MS3_06283 | 0.25 | 0.4  | 0.59 | 0.47 | 0.71 | 8.54  | 8.75  | 0.810584235 | 9   | 2  | 3.703703704 | 6.896551724 |
| MS3_10423 | 0.25 | 0.39 | 0.48 | 0.36 | 0.59 | 9.49  | 9.28  | 1.233678064 | 67  | 5  | 27.57201646 | 17.24137931 |
| MS3_10492 | 0.25 | 0.39 | 0.55 | 0.44 | 0.65 | 9.16  | 9.32  | 0.852143786 | 45  | 6  | 18.51851852 | 20.68965517 |
| MS3_00187 | 0.26 | 0.41 | 0.58 | 0.47 | 0.68 | 8.39  | 8.56  | 0.843664804 | 12  | 0  | 4.938271605 | 0           |
| MS3_05425 | 0.26 | 0.41 | 0.64 | 0.54 | 0.74 | 8.85  | 9.06  | 0.81058424  | 11  | 3  | 4.526748971 | 10.34482759 |
| MS3_08157 | 0.26 | 0.4  | 0.56 | 0.45 | 0.67 | 8.59  | 8.42  | 1.185304868 | 11  | 0  | 4.526748971 | 0           |
| MS3_08929 | 0.26 | 0.4  | 0.47 | 0.36 | 0.57 | 8.43  | 8.24  | 1.209249624 | 16  | 0  | 6.58436214  | 0           |
| MS3_09110 | 0.26 | 0.4  | 0.59 | 0.48 | 0.7  | 8.42  | 8.58  | 0.852143778 | 1   | 0  | 0.411522634 | 0           |
| MS3_00183 | 0.27 | 0.42 | 0.59 | 0.49 | 0.69 | 9.16  | 9.4   | 0.786627858 | 55  | 7  | 22.63374486 | 24.13793103 |
| MS3_04083 | 0.27 | 0.42 | 0.58 | 0.47 | 0.69 | 11.55 | 11.16 | 1.476980794 | 228 | 23 | 93.82716049 | 79.31034483 |
| MS3_05351 | 0.27 | 0.42 | 0.54 | 0.43 | 0.64 | 6.36  | 6.2   | 1.173512195 | 1   | 0  | 0.411522634 | 0           |
| MS3_09190 | 0.27 | 0.42 | 0.56 | 0.44 | 0.67 | 8.3   | 8.47  | 0.843664802 | 6   | 0  | 2.469135802 | 0           |
| MS3_03443 | 0.28 | 0.43 | 0.53 | 0.43 | 0.64 | 8.09  | 7.92  | 1.185304896 | 13  | 0  | 5.349794239 | 0           |
| MS3_00702 | 0.28 | 0.43 | 0.56 | 0.46 | 0.66 | 8.53  | 8.68  | 0.860707968 | 10  | 1  | 4.115226337 | 3.448275862 |
| MS3_05754 | 0.28 | 0.43 | 0.56 | 0.45 | 0.67 | 8     | 7.85  | 1.161834288 | 0   | 0  | 0           | 0           |
| MS3_09690 | 0.28 | 0.43 | 0.57 | 0.46 | 0.68 | 8.85  | 9.03  | 0.835270206 | 33  | 4  | 13.58024691 | 13.79310345 |
| MS3_02136 | 0.29 | 0.44 | 0.65 | 0.53 | 0.76 | 9.13  | 9.4   | 0.763379491 | 62  | 15 | 25.51440329 | 51.72413793 |
| MS3_04386 | 0.29 | 0.44 | 0.47 | 0.37 | 0.57 | 8.01  | 7.85  | 1.17351092  | 9   | 0  | 3.703703704 | 0           |
| MS3_04962 | 0.29 | 0.44 | 0.61 | 0.48 | 0.73 | 9.04  | 8.78  | 1.296930099 | 37  | 5  | 15.22633745 | 17.24137931 |
| MS3_05735 | 0.29 | 0.44 | 0.55 | 0.45 | 0.64 | 9.08  | 9.25  | 0.843664813 | 41  | 3  | 16.87242798 | 10.34482759 |
| MS3_06462 | 0.29 | 0.44 | 0.52 | 0.43 | 0.6  | 9.59  | 9.76  | 0.843664815 | 106 | 10 | 43.62139918 | 34.48275862 |
| MS3_06825 | 0.29 | 0.44 | 0.55 | 0.44 | 0.67 | 8.6   | 8.45  | 1.161834257 | 7   | 0  | 2.880658436 | 0           |
| MS3_07002 | 0.29 | 0.44 | 0.56 | 0.45 | 0.66 | 8.6   | 8.74  | 0.869358228 | 8   | 0  | 3.29218107  | 0           |
| MS3_09305 | 0.29 | 0.44 | 0.55 | 0.46 | 0.65 | 8.57  | 8.66  | 0.91393118  | 2   | 0  | 0.823045267 | 0           |
| MS3_09993 | 0.29 | 0.44 | 0.45 | 0.33 | 0.57 | 8.46  | 8.29  | 1.185304873 | 7   | 0  | 2.880658436 | 0           |
| MS3_00403 | 0.3  | 0.44 | 0.55 | 0.44 | 0.66 | 8.5   | 8.35  | 1.16183426  | 8   | 0  | 3.29218107  | 0           |
| MS3_00844 | 0.3  | 0.45 | 0.53 | 0.42 | 0.63 | 7.65  | 7.48  | 1.18530496  | 6   | 0  | 2.469135802 | 0           |
| MS3_00876 | 0.3  | 0.45 | 0.58 | 0.48 | 0.69 | 8.5   | 8.34  | 1.173510889 | 11  | 2  | 4.526748971 | 6.896551724 |
| MS3_02486 | 0.3  | 0.45 | 0.55 | 0.44 | 0.66 | 7.79  | 7.66  | 1.138828441 | 1   | 0  | 0.411522634 | 0           |
| MS3_05142 | 0.3  | 0.45 | 0.56 | 0.45 | 0.66 | 8.76  | 8.89  | 0.878095426 | 9   | 1  | 3.703703704 | 3.448275862 |
| MS3_09682 | 0.3  | 0.44 | 0.5  | 0.4  | 0.59 | 9.41  | 9.6   | 0.826959132 | 106 | 9  | 43.62139918 | 31.03448276 |
| MS3_02375 | 0.31 | 0.47 | 0.54 | 0.43 | 0.65 | 8.71  | 8.57  | 1.150273809 | 2   | 0  | 0.823045267 | 0           |
| MS3_02489 | 0.31 | 0.46 | 0.54 | 0.45 | 0.63 | 8.22  | 8.09  | 1.138828408 | 8   | 1  | 3.29218107  | 3.448275862 |

|           |      |      |      |      |      |      |       |             |     |    |             |             |
|-----------|------|------|------|------|------|------|-------|-------------|-----|----|-------------|-------------|
| MS3_03818 | 0.31 | 0.46 | 0.52 | 0.42 | 0.63 | 6.38 | 6.27  | 1.11627886  | 1   | 0  | 0.411522634 | 0           |
| MS3_06431 | 0.31 | 0.46 | 0.56 | 0.45 | 0.67 | 8.32 | 8.47  | 0.860707963 | 5   | 1  | 2.057613169 | 3.448275862 |
| MS3_07716 | 0.31 | 0.46 | 0.55 | 0.43 | 0.67 | 7.93 | 7.76  | 1.185304913 | 8   | 0  | 3.29218107  | 0           |
| MS3_00450 | 0.32 | 0.47 | 0.55 | 0.45 | 0.65 | 8.37 | 8.26  | 1.116278085 | 0   | 0  | 0           | 0           |
| MS3_04493 | 0.32 | 0.47 | 0.58 | 0.46 | 0.7  | 7.91 | 8.08  | 0.843664784 | 2   | 0  | 0.823045267 | 0           |
| MS3_05495 | 0.32 | 0.47 | 0.55 | 0.42 | 0.68 | 8.81 | 8.61  | 1.221402772 | 12  | 3  | 4.938271605 | 10.34482759 |
| MS3_09076 | 0.32 | 0.47 | 0.54 | 0.43 | 0.64 | 8.06 | 7.88  | 1.197217415 | 12  | 0  | 4.938271605 | 0           |
| MS3_09124 | 0.32 | 0.47 | 0.58 | 0.47 | 0.68 | 6.66 | 6.83  | 0.843664417 | 0   | 0  | 0           | 0           |
| MS3_01218 | 0.33 | 0.49 | 0.54 | 0.43 | 0.65 | 8.87 | 8.72  | 1.161834251 | 13  | 1  | 5.349794239 | 3.448275862 |
| MS3_01353 | 0.33 | 0.48 | 0.56 | 0.45 | 0.66 | 7.92 | 8.06  | 0.869358207 | 5   | 0  | 2.057613169 | 0           |
| MS3_02539 | 0.33 | 0.48 | 0.53 | 0.41 | 0.65 | 8.61 | 8.4   | 1.233678081 | 12  | 0  | 4.938271605 | 0           |
| MS3_03084 | 0.33 | 0.48 | 0.58 | 0.46 | 0.69 | 9.89 | 10.19 | 0.74081822  | 127 | 16 | 52.26337449 | 55.17241379 |
| MS3_03405 | 0.33 | 0.49 | 0.55 | 0.44 | 0.66 | 8.46 | 8.6   | 0.869358226 | 4   | 0  | 1.646090535 | 0           |
| MS3_03802 | 0.33 | 0.48 | 0.58 | 0.47 | 0.68 | 9.02 | 9.23  | 0.810584242 | 50  | 7  | 20.57613169 | 24.13793103 |
| MS3_03918 | 0.33 | 0.48 | 0.55 | 0.43 | 0.67 | 8.05 | 8.21  | 0.852143765 | 3   | 0  | 1.234567901 | 0           |
| MS3_08636 | 0.33 | 0.48 | 0.48 | 0.38 | 0.58 | 7.75 | 7.63  | 1.127496908 | 1   | 0  | 0.411522634 | 0           |
| MS3_04053 | 0.34 | 0.49 | 0.44 | 0.34 | 0.55 | 8.98 | 8.77  | 1.23367807  | 48  | 3  | 19.75308642 | 10.34482759 |
| MS3_09273 | 0.34 | 0.49 | 0.56 | 0.46 | 0.67 | 7.8  | 7.61  | 1.209249692 | 6   | 1  | 2.469135802 | 3.448275862 |
| MS3_10600 | 0.34 | 0.49 | 0.55 | 0.46 | 0.65 | 7.46 | 7.62  | 0.852143712 | 2   | 1  | 0.823045267 | 3.448275862 |
| MS3_00383 | 0.35 | 0.5  | 0.55 | 0.44 | 0.66 | 9.24 | 9.45  | 0.810584243 | 58  | 6  | 23.86831276 | 20.68965517 |
| MS3_01104 | 0.35 | 0.5  | 0.52 | 0.43 | 0.62 | 9.5  | 9.62  | 0.886920436 | 104 | 10 | 42.79835391 | 34.48275862 |
| MS3_01286 | 0.35 | 0.5  | 0.56 | 0.44 | 0.68 | 6.63 | 6.48  | 1.161834951 | 0   | 0  | 0           | 0           |
| MS3_01898 | 0.35 | 0.5  | 0.55 | 0.42 | 0.68 | 9.14 | 8.93  | 1.233678067 | 44  | 6  | 18.10699588 | 20.68965517 |
| MS3_05555 | 0.35 | 0.5  | 0.57 | 0.46 | 0.67 | 6.57 | 6.72  | 0.860707538 | 1   | 0  | 0.411522634 | 0           |
| MS3_09406 | 0.35 | 0.5  | 0.54 | 0.44 | 0.65 | 8.4  | 8.26  | 1.150273818 | 14  | 1  | 5.761316872 | 3.448275862 |
| MS3_09620 | 0.35 | 0.51 | 0.56 | 0.45 | 0.68 | 8.27 | 8.43  | 0.852143774 | 2   | 0  | 0.823045267 | 0           |
| MS3_10297 | 0.35 | 0.5  | 0.55 | 0.44 | 0.66 | 7.56 | 7.74  | 0.835270143 | 3   | 0  | 1.234567901 | 0           |
| MS3_10486 | 0.35 | 0.5  | 0.57 | 0.46 | 0.68 | 9.94 | 10.11 | 0.843664816 | 170 | 22 | 69.95884774 | 75.86206897 |
| MS3_10607 | 0.35 | 0.5  | 0.5  | 0.41 | 0.6  | 6.67 | 6.55  | 1.127497344 | 4   | 0  | 1.646090535 | 0           |
| MS3_11526 | 0.35 | 0.5  | 0.59 | 0.5  | 0.69 | 9.22 | 9.41  | 0.826959131 | 62  | 7  | 25.51440329 | 24.13793103 |
| MS3_00850 | 0.37 | 0.53 | 0.59 | 0.48 | 0.71 | 8.44 | 8.61  | 0.843664805 | 20  | 2  | 8.230452675 | 6.896551724 |
| MS3_02954 | 0.37 | 0.53 | 0.56 | 0.44 | 0.67 | 8.54 | 8.36  | 1.197217383 | 15  | 1  | 6.172839506 | 3.448275862 |
| MS3_03558 | 0.37 | 0.53 | 0.48 | 0.38 | 0.58 | 8.23 | 8.36  | 0.878095417 | 2   | 1  | 0.823045267 | 3.448275862 |
| MS3_05959 | 0.38 | 0.54 | 0.55 | 0.44 | 0.65 | 9.26 | 9.06  | 1.221402764 | 42  | 3  | 17.28395062 | 10.34482759 |
| MS3_09546 | 0.38 | 0.53 | 0.49 | 0.38 | 0.6  | 8.9  | 8.76  | 1.150273806 | 27  | 1  | 11.11111111 | 3.448275862 |
| MS3_10898 | 0.38 | 0.53 | 0.61 | 0.5  | 0.72 | 9.57 | 9.77  | 0.818730752 | 115 | 15 | 47.32510288 | 51.72413793 |
| MS3_11161 | 0.38 | 0.54 | 0.56 | 0.45 | 0.66 | 7.44 | 7.31  | 1.1388285   | 1   | 0  | 0.411522634 | 0           |

|           |      |      |      |      |      |       |       |             |     |    |             |             |
|-----------|------|------|------|------|------|-------|-------|-------------|-----|----|-------------|-------------|
| MS3_00508 | 0.39 | 0.54 | 0.48 | 0.36 | 0.59 | 9.05  | 8.76  | 1.336427503 | 69  | 7  | 28.39506173 | 24.13793103 |
| MS3_03513 | 0.39 | 0.55 | 0.57 | 0.45 | 0.69 | 6.76  | 6.61  | 1.161834789 | 4   | 0  | 1.646090535 | 0           |
| MS3_06704 | 0.39 | 0.54 | 0.54 | 0.42 | 0.65 | 8.83  | 8.69  | 1.150273807 | 6   | 1  | 2.469135802 | 3.448275862 |
| MS3_10900 | 0.39 | 0.55 | 0.57 | 0.46 | 0.68 | 7     | 7.17  | 0.843664614 | 3   | 1  | 1.234567901 | 3.448275862 |
| MS3_03372 | 0.4  | 0.55 | 0.56 | 0.45 | 0.68 | 8.99  | 9.18  | 0.82695913  | 39  | 5  | 16.04938272 | 17.24137931 |
| MS3_03571 | 0.4  | 0.56 | 0.58 | 0.47 | 0.69 | 7.79  | 7.92  | 0.878095396 | 2   | 0  | 0.823045267 | 0           |
| MS3_05952 | 0.4  | 0.55 | 0.51 | 0.41 | 0.61 | 9.14  | 8.96  | 1.197217369 | 38  | 1  | 15.63786008 | 3.448275862 |
| MS3_06488 | 0.4  | 0.56 | 0.56 | 0.45 | 0.66 | 8.89  | 9.17  | 0.755783735 | 67  | 5  | 27.57201646 | 17.24137931 |
| MS3_08415 | 0.4  | 0.56 | 0.49 | 0.39 | 0.58 | 7.8   | 7.71  | 1.09417432  | 3   | 0  | 1.234567901 | 0           |
| MS3_09128 | 0.4  | 0.56 | 0.57 | 0.46 | 0.69 | 8.67  | 8.87  | 0.818730745 | 35  | 6  | 14.40329218 | 20.68965517 |
| MS3_01030 | 0.41 | 0.57 | 0.55 | 0.44 | 0.66 | 8.73  | 8.91  | 0.835270205 | 24  | 1  | 9.87654321  | 3.448275862 |
| MS3_03206 | 0.41 | 0.56 | 0.55 | 0.45 | 0.66 | 8.92  | 9.09  | 0.843664812 | 37  | 6  | 15.22633745 | 20.68965517 |
| MS3_07918 | 0.41 | 0.57 | 0.54 | 0.44 | 0.65 | 8.69  | 8.85  | 0.852143782 | 33  | 2  | 13.58024691 | 6.896551724 |
| MS3_09443 | 0.41 | 0.56 | 0.55 | 0.45 | 0.65 | 8.35  | 8.24  | 1.116278086 | 1   | 0  | 0.411522634 | 0           |
| MS3_10513 | 0.41 | 0.57 | 0.48 | 0.39 | 0.58 | 8.62  | 8.7   | 0.923116342 | 2   | 0  | 0.823045267 | 0           |
| MS3_11544 | 0.41 | 0.57 | 0.52 | 0.42 | 0.62 | 9.57  | 9.68  | 0.895834134 | 97  | 11 | 39.91769547 | 37.93103448 |
| MS3_01693 | 0.42 | 0.58 | 0.55 | 0.45 | 0.65 | 7.66  | 7.79  | 0.878095386 | 0   | 0  | 0           | 0           |
| MS3_06889 | 0.42 | 0.58 | 0.55 | 0.44 | 0.65 | 9.05  | 8.88  | 1.185304858 | 43  | 2  | 17.69547325 | 6.896551724 |
| MS3_05908 | 0.43 | 0.59 | 0.53 | 0.42 | 0.64 | 8.78  | 8.66  | 1.127496859 | 20  | 1  | 8.230452675 | 3.448275862 |
| MS3_10397 | 0.43 | 0.59 | 0.55 | 0.45 | 0.65 | 7.71  | 7.88  | 0.843664768 | 8   | 1  | 3.29218107  | 3.448275862 |
| MS3_03973 | 0.44 | 0.6  | 0.56 | 0.44 | 0.67 | 7.34  | 7.46  | 0.886920357 | 0   | 0  | 0           | 0           |
| MS3_04559 | 0.44 | 0.6  | 0.49 | 0.38 | 0.61 | 8.69  | 8.55  | 1.150273809 | 17  | 0  | 6.995884774 | 0           |
| MS3_04820 | 0.44 | 0.6  | 0.51 | 0.42 | 0.61 | 9.66  | 9.47  | 1.2092496   | 102 | 7  | 41.97530864 | 24.13793103 |
| MS3_06677 | 0.44 | 0.6  | 0.55 | 0.42 | 0.67 | 7.91  | 8.06  | 0.860707946 | 1   | 0  | 0.411522634 | 0           |
| MS3_06789 | 0.44 | 0.6  | 0.54 | 0.43 | 0.65 | 8.61  | 8.72  | 0.895834129 | 7   | 0  | 2.880658436 | 0           |
| MS3_11484 | 0.45 | 0.61 | 0.56 | 0.45 | 0.67 | 9.16  | 9.32  | 0.852143786 | 67  | 6  | 27.57201646 | 20.68965517 |
| MS3_02368 | 0.45 | 0.61 | 0.54 | 0.43 | 0.64 | 8.03  | 8.13  | 0.904837401 | 3   | 0  | 1.234567901 | 0           |
| MS3_02442 | 0.45 | 0.61 | 0.53 | 0.42 | 0.64 | 9.68  | 9.79  | 0.895834135 | 117 | 12 | 48.14814815 | 41.37931034 |
| MS3_04268 | 0.45 | 0.61 | 0.54 | 0.43 | 0.66 | 7.21  | 7.12  | 1.094174402 | 0   | 0  | 0           | 0           |
| MS3_04285 | 0.45 | 0.61 | 0.5  | 0.42 | 0.59 | 9.7   | 9.79  | 0.913931185 | 117 | 8  | 48.14814815 | 27.5862069  |
| MS3_04781 | 0.45 | 0.61 | 0.53 | 0.42 | 0.64 | 8.79  | 8.91  | 0.886920432 | 17  | 3  | 6.995884774 | 10.34482759 |
| MS3_05520 | 0.45 | 0.61 | 0.54 | 0.44 | 0.64 | 8.48  | 8.57  | 0.913931179 | 3   | 0  | 1.234567901 | 0           |
| MS3_10998 | 0.45 | 0.61 | 0.56 | 0.45 | 0.66 | 9.29  | 9.43  | 0.869358234 | 79  | 10 | 32.51028807 | 34.48275862 |
| MS3_03988 | 0.46 | 0.62 | 0.53 | 0.41 | 0.64 | 7.31  | 7.21  | 1.105171028 | 0   | 0  | 0           | 0           |
| MS3_08480 | 0.46 | 0.61 | 0.56 | 0.45 | 0.66 | 10.35 | 10.12 | 1.258600011 | 194 | 21 | 79.83539095 | 72.4137931  |
| MS3_09879 | 0.46 | 0.61 | 0.52 | 0.41 | 0.63 | 7.31  | 7.21  | 1.105171028 | 0   | 0  | 0           | 0           |
| MS3_00808 | 0.47 | 0.63 | 0.54 | 0.44 | 0.64 | 9     | 9.1   | 0.904837416 | 26  | 2  | 10.69958848 | 6.896551724 |

|           |      |      |      |      |      |       |       |             |     |    |             |             |
|-----------|------|------|------|------|------|-------|-------|-------------|-----|----|-------------|-------------|
| MS3_01051 | 0.47 | 0.63 | 0.48 | 0.39 | 0.57 | 8.67  | 8.59  | 1.083287073 | 14  | 0  | 5.761316872 | 0           |
| MS3_03119 | 0.47 | 0.62 | 0.54 | 0.42 | 0.65 | 7.89  | 8.01  | 0.88692041  | 2   | 0  | 0.823045267 | 0           |
| MS3_08725 | 0.47 | 0.62 | 0.53 | 0.44 | 0.63 | 8.87  | 8.99  | 0.886920433 | 49  | 2  | 20.16460905 | 6.896551724 |
| MS3_09961 | 0.47 | 0.63 | 0.55 | 0.44 | 0.65 | 9.54  | 9.39  | 1.161834245 | 107 | 10 | 44.03292181 | 34.48275862 |
| MS3_11280 | 0.47 | 0.63 | 0.48 | 0.39 | 0.58 | 8.07  | 7.97  | 1.105170942 | 9   | 0  | 3.703703704 | 0           |
| MS3_01096 | 0.48 | 0.63 | 0.49 | 0.39 | 0.6  | 8.05  | 7.93  | 1.127496883 | 21  | 0  | 8.641975309 | 0           |
| MS3_04147 | 0.48 | 0.63 | 0.54 | 0.42 | 0.66 | 7.74  | 7.6   | 1.150273869 | 6   | 0  | 2.469135802 | 0           |
| MS3_05284 | 0.48 | 0.63 | 0.55 | 0.42 | 0.67 | 8.29  | 8.4   | 0.895834124 | 1   | 0  | 0.411522634 | 0           |
| MS3_05389 | 0.48 | 0.63 | 0.52 | 0.41 | 0.63 | 7.37  | 7.25  | 1.127496973 | 2   | 0  | 0.823045267 | 0           |
| MS3_06258 | 0.48 | 0.63 | 0.56 | 0.44 | 0.68 | 8.66  | 8.51  | 1.161834255 | 16  | 4  | 6.58436214  | 13.79310345 |
| MS3_10188 | 0.48 | 0.63 | 0.51 | 0.39 | 0.63 | 7.12  | 6.96  | 1.17351116  | 10  | 0  | 4.115226337 | 0           |
| MS3_00242 | 0.49 | 0.63 | 0.55 | 0.45 | 0.65 | 9.02  | 9.18  | 0.852143786 | 50  | 4  | 20.57613169 | 13.79310345 |
| MS3_01004 | 0.49 | 0.63 | 0.53 | 0.41 | 0.64 | 9.74  | 9.94  | 0.818730752 | 131 | 16 | 53.90946502 | 55.17241379 |
| MS3_01705 | 0.49 | 0.63 | 0.52 | 0.42 | 0.62 | 6.06  | 5.99  | 1.07250906  | 0   | 0  | 0           | 0           |
| MS3_05896 | 0.49 | 0.64 | 0.48 | 0.38 | 0.58 | 8.16  | 8.24  | 0.923116335 | 0   | 0  | 0           | 0           |
| MS3_06347 | 0.49 | 0.63 | 0.56 | 0.45 | 0.67 | 8.71  | 8.61  | 1.105170925 | 10  | 1  | 4.115226337 | 3.448275862 |
| MS3_07693 | 0.49 | 0.64 | 0.52 | 0.42 | 0.63 | 10.47 | 10.31 | 1.173510871 | 193 | 21 | 79.42386831 | 72.4137931  |
| MS3_07874 | 0.49 | 0.63 | 0.59 | 0.48 | 0.71 | 9.18  | 9.33  | 0.860707974 | 53  | 8  | 21.81069959 | 27.5862069  |
| MS3_09698 | 0.49 | 0.63 | 0.54 | 0.43 | 0.65 | 8.1   | 8.01  | 1.094174304 | 1   | 0  | 0.411522634 | 0           |
| MS3_00663 | 0.5  | 0.65 | 0.55 | 0.45 | 0.66 | 7.6   | 7.5   | 1.105170979 | 2   | 1  | 0.823045267 | 3.448275862 |
| MS3_03130 | 0.5  | 0.65 | 0.59 | 0.48 | 0.7  | 7.75  | 7.62  | 1.138828446 | 2   | 1  | 0.823045267 | 3.448275862 |
| MS3_08283 | 0.5  | 0.65 | 0.52 | 0.41 | 0.64 | 7.86  | 7.75  | 1.116278111 | 4   | 0  | 1.646090535 | 0           |
| MS3_05484 | 0.51 | 0.66 | 0.53 | 0.41 | 0.64 | 7.62  | 7.51  | 1.116278137 | 6   | 0  | 2.469135802 | 0           |
| MS3_09829 | 0.51 | 0.66 | 0.5  | 0.39 | 0.6  | 6.5   | 6.42  | 1.083287493 | 1   | 0  | 0.411522634 | 0           |
| MS3_01318 | 0.52 | 0.66 | 0.56 | 0.45 | 0.67 | 9.04  | 9.25  | 0.810584242 | 79  | 11 | 32.51028807 | 37.93103448 |
| MS3_04595 | 0.52 | 0.67 | 0.57 | 0.47 | 0.68 | 7.77  | 7.94  | 0.843664773 | 29  | 0  | 11.93415638 | 0           |
| MS3_04642 | 0.52 | 0.67 | 0.49 | 0.39 | 0.6  | 9.08  | 9.18  | 0.904837416 | 45  | 5  | 18.51851852 | 17.24137931 |
| MS3_07096 | 0.52 | 0.67 | 0.55 | 0.44 | 0.66 | 7.8   | 7.89  | 0.91393116  | 3   | 0  | 1.234567901 | 0           |
| MS3_08037 | 0.52 | 0.67 | 0.53 | 0.42 | 0.64 | 8.62  | 8.53  | 1.094174291 | 3   | 0  | 1.234567901 | 0           |
| MS3_00610 | 0.53 | 0.67 | 0.54 | 0.44 | 0.64 | 8.85  | 8.98  | 0.878095427 | 25  | 2  | 10.28806584 | 6.896551724 |
| MS3_01105 | 0.53 | 0.68 | 0.51 | 0.4  | 0.61 | 7.54  | 7.44  | 1.105170987 | 1   | 0  | 0.411522634 | 0           |
| MS3_03937 | 0.53 | 0.68 | 0.57 | 0.48 | 0.66 | 9.13  | 9     | 1.138828387 | 55  | 1  | 22.63374486 | 3.448275862 |
| MS3_06807 | 0.53 | 0.67 | 0.55 | 0.43 | 0.66 | 7.67  | 7.8   | 0.878095387 | 5   | 0  | 2.057613169 | 0           |
| MS3_07738 | 0.53 | 0.68 | 0.5  | 0.39 | 0.61 | 8.36  | 8.24  | 1.127496868 | 17  | 0  | 6.995884774 | 0           |
| MS3_08840 | 0.53 | 0.67 | 0.55 | 0.44 | 0.66 | 8.25  | 8.35  | 0.904837407 | 5   | 0  | 2.057613169 | 0           |
| MS3_10811 | 0.53 | 0.67 | 0.54 | 0.44 | 0.65 | 8.49  | 8.37  | 1.127496864 | 20  | 2  | 8.230452675 | 6.896551724 |
| MS3_10931 | 0.53 | 0.68 | 0.54 | 0.42 | 0.65 | 7.94  | 8.03  | 0.913931166 | 2   | 0  | 0.823045267 | 0           |

|           |      |      |      |      |      |       |       |             |     |    |             |             |
|-----------|------|------|------|------|------|-------|-------|-------------|-----|----|-------------|-------------|
| MS3_00756 | 0.54 | 0.68 | 0.5  | 0.4  | 0.6  | 9.47  | 9.6   | 0.87809543  | 98  | 9  | 40.32921811 | 31.03448276 |
| MS3_03599 | 0.54 | 0.69 | 0.59 | 0.48 | 0.69 | 10.11 | 10.01 | 1.105170918 | 191 | 17 | 78.60082305 | 58.62068966 |
| MS3_10249 | 0.54 | 0.68 | 0.54 | 0.43 | 0.64 | 8.59  | 8.67  | 0.923116342 | 11  | 0  | 4.526748971 | 0           |
| MS3_00277 | 0.55 | 0.69 | 0.53 | 0.44 | 0.63 | 10.73 | 10.51 | 1.246076731 | 160 | 15 | 65.8436214  | 51.72413793 |
| MS3_00312 | 0.55 | 0.69 | 0.49 | 0.37 | 0.61 | 9.57  | 9.42  | 1.161834245 | 96  | 12 | 39.50617284 | 41.37931034 |
| MS3_01840 | 0.55 | 0.69 | 0.51 | 0.41 | 0.6  | 9.46  | 9.53  | 0.932393819 | 80  | 7  | 32.9218107  | 24.13793103 |
| MS3_05126 | 0.55 | 0.69 | 0.51 | 0.39 | 0.63 | 8.98  | 9.17  | 0.82695913  | 36  | 4  | 14.81481481 | 13.79310345 |
| MS3_11077 | 0.55 | 0.69 | 0.52 | 0.41 | 0.63 | 7.8   | 7.72  | 1.083287099 | 1   | 0  | 0.411522634 | 0           |
| MS3_01257 | 0.56 | 0.7  | 0.54 | 0.45 | 0.64 | 7.82  | 7.98  | 0.852143751 | 33  | 2  | 13.58024691 | 6.896551724 |
| MS3_02041 | 0.56 | 0.7  | 0.52 | 0.43 | 0.61 | 8.16  | 8.23  | 0.93239381  | 0   | 0  | 0           | 0           |
| MS3_03872 | 0.56 | 0.7  | 0.54 | 0.45 | 0.62 | 9.5   | 9.38  | 1.127496853 | 93  | 4  | 38.27160494 | 13.79310345 |
| MS3_09739 | 0.56 | 0.7  | 0.53 | 0.42 | 0.64 | 8.2   | 8.29  | 0.913931174 | 4   | 1  | 1.646090535 | 3.448275862 |
| MS3_00054 | 0.57 | 0.71 | 0.56 | 0.47 | 0.66 | 8.1   | 8.16  | 0.941764524 | 6   | 0  | 2.469135802 | 0           |
| MS3_00449 | 0.57 | 0.71 | 0.54 | 0.43 | 0.66 | 7.82  | 7.91  | 0.913931161 | 2   | 0  | 0.823045267 | 0           |
| MS3_00504 | 0.57 | 0.71 | 0.5  | 0.4  | 0.6  | 8.56  | 8.48  | 1.083287075 | 17  | 0  | 6.995884774 | 0           |
| MS3_03963 | 0.57 | 0.71 | 0.5  | 0.39 | 0.6  | 7.18  | 7.11  | 1.072508275 | 2   | 0  | 0.823045267 | 0           |
| MS3_11226 | 0.57 | 0.71 | 0.57 | 0.45 | 0.68 | 7.99  | 8.08  | 0.913931168 | 0   | 0  | 0           | 0           |
| MS3_00405 | 0.58 | 0.72 | 0.53 | 0.42 | 0.63 | 8.37  | 8.29  | 1.083287078 | 3   | 0  | 1.234567901 | 0           |
| MS3_01386 | 0.58 | 0.72 | 0.46 | 0.34 | 0.57 | 8.25  | 8.36  | 0.895834123 | 11  | 1  | 4.526748971 | 3.448275862 |
| MS3_03041 | 0.58 | 0.72 | 0.49 | 0.39 | 0.59 | 6.67  | 6.59  | 1.08328737  | 1   | 0  | 0.411522634 | 0           |
| MS3_05002 | 0.58 | 0.71 | 0.54 | 0.43 | 0.66 | 8.38  | 8.46  | 0.923116339 | 1   | 0  | 0.411522634 | 0           |
| MS3_05230 | 0.58 | 0.72 | 0.51 | 0.42 | 0.59 | 8.44  | 8.39  | 1.051271102 | 4   | 0  | 1.646090535 | 0           |
| MS3_06994 | 0.58 | 0.72 | 0.57 | 0.49 | 0.66 | 9.45  | 9.39  | 1.061836547 | 69  | 3  | 28.39506173 | 10.34482759 |
| MS3_11293 | 0.58 | 0.72 | 0.55 | 0.45 | 0.65 | 9.45  | 9.57  | 0.886920436 | 95  | 10 | 39.09465021 | 34.48275862 |
| MS3_02172 | 0.59 | 0.72 | 0.52 | 0.42 | 0.63 | 10.02 | 10.09 | 0.93239382  | 152 | 18 | 62.55144033 | 62.06896552 |
| MS3_05447 | 0.59 | 0.72 | 0.59 | 0.47 | 0.7  | 7.58  | 7.45  | 1.138828471 | 7   | 1  | 2.880658436 | 3.448275862 |
| MS3_07037 | 0.59 | 0.72 | 0.51 | 0.38 | 0.64 | 8.49  | 8.39  | 1.105170928 | 2   | 0  | 0.823045267 | 0           |
| MS3_00413 | 0.6  | 0.73 | 0.55 | 0.44 | 0.66 | 7.84  | 7.76  | 1.083287097 | 1   | 1  | 0.411522634 | 3.448275862 |
| MS3_04717 | 0.6  | 0.73 | 0.55 | 0.46 | 0.64 | 7.41  | 7.49  | 0.923116296 | 4   | 0  | 1.646090535 | 0           |
| MS3_05631 | 0.6  | 0.73 | 0.56 | 0.47 | 0.64 | 9.83  | 9.74  | 1.094174284 | 129 | 8  | 53.08641975 | 27.5862069  |
| MS3_09161 | 0.6  | 0.73 | 0.51 | 0.4  | 0.62 | 9.12  | 9.05  | 1.072508183 | 28  | 0  | 11.52263374 | 0           |
| MS3_00787 | 0.61 | 0.74 | 0.51 | 0.41 | 0.62 | 10.67 | 10.76 | 0.913931185 | 233 | 26 | 95.88477366 | 89.65517241 |
| MS3_02476 | 0.61 | 0.74 | 0.55 | 0.44 | 0.66 | 8.38  | 8.28  | 1.105170931 | 9   | 2  | 3.703703704 | 6.896551724 |
| MS3_02504 | 0.61 | 0.74 | 0.52 | 0.4  | 0.64 | 8.44  | 8.35  | 1.094174294 | 9   | 1  | 3.703703704 | 3.448275862 |
| MS3_05761 | 0.61 | 0.74 | 0.56 | 0.46 | 0.67 | 6.26  | 6.31  | 0.951229094 | 0   | 0  | 0           | 0           |
| MS3_06468 | 0.61 | 0.74 | 0.52 | 0.42 | 0.61 | 7.8   | 7.73  | 1.072508208 | 1   | 0  | 0.411522634 | 0           |
| MS3_06769 | 0.61 | 0.74 | 0.53 | 0.43 | 0.63 | 7.91  | 7.84  | 1.072508203 | 2   | 1  | 0.823045267 | 3.448275862 |

|           |      |      |      |      |      |       |       |             |     |    |             |             |
|-----------|------|------|------|------|------|-------|-------|-------------|-----|----|-------------|-------------|
| MS3_00361 | 0.62 | 0.74 | 0.51 | 0.41 | 0.61 | 8.87  | 8.99  | 0.886920433 | 55  | 5  | 22.63374486 | 17.24137931 |
| MS3_01435 | 0.63 | 0.76 | 0.51 | 0.4  | 0.62 | 8.14  | 8.07  | 1.072508195 | 4   | 0  | 1.646090535 | 0           |
| MS3_02359 | 0.63 | 0.76 | 0.54 | 0.43 | 0.66 | 7.46  | 7.53  | 0.93239378  | 3   | 0  | 1.234567901 | 0           |
| MS3_02951 | 0.63 | 0.76 | 0.48 | 0.37 | 0.58 | 10.59 | 10.53 | 1.061836547 | 237 | 25 | 97.5308642  | 86.20689655 |
| MS3_03406 | 0.63 | 0.76 | 0.55 | 0.44 | 0.65 | 8.19  | 8.27  | 0.923116336 | 5   | 0  | 2.057613169 | 0           |
| MS3_07587 | 0.63 | 0.76 | 0.52 | 0.41 | 0.62 | 9.84  | 9.91  | 0.93239382  | 133 | 16 | 54.73251029 | 55.17241379 |
| MS3_00665 | 0.64 | 0.76 | 0.53 | 0.42 | 0.65 | 7.08  | 7.16  | 0.92311625  | 2   | 0  | 0.823045267 | 0           |
| MS3_00404 | 0.65 | 0.78 | 0.51 | 0.41 | 0.62 | 8.86  | 8.91  | 0.951229423 | 8   | 1  | 3.29218107  | 3.448275862 |
| MS3_02991 | 0.65 | 0.77 | 0.52 | 0.42 | 0.63 | 9.19  | 9.09  | 1.105170921 | 61  | 6  | 25.10288066 | 20.68965517 |
| MS3_10085 | 0.65 | 0.78 | 0.55 | 0.45 | 0.64 | 9.68  | 9.59  | 1.094174285 | 105 | 7  | 43.20987654 | 24.13793103 |
| MS3_01406 | 0.66 | 0.79 | 0.51 | 0.41 | 0.62 | 9.17  | 9.1   | 1.072508183 | 50  | 5  | 20.57613169 | 17.24137931 |
| MS3_04117 | 0.66 | 0.79 | 0.5  | 0.4  | 0.6  | 6.22  | 6.16  | 1.061837082 | 2   | 0  | 0.823045267 | 0           |
| MS3_05157 | 0.66 | 0.79 | 0.47 | 0.36 | 0.58 | 7.93  | 7.86  | 1.072508202 | 1   | 0  | 0.411522634 | 0           |
| MS3_09233 | 0.66 | 0.79 | 0.52 | 0.42 | 0.61 | 8.83  | 8.9   | 0.932393817 | 18  | 0  | 7.407407407 | 0           |
| MS3_08446 | 0.67 | 0.79 | 0.48 | 0.37 | 0.6  | 8.25  | 8.19  | 1.061836556 | 1   | 0  | 0.411522634 | 0           |
| MS3_04873 | 0.67 | 0.79 | 0.54 | 0.42 | 0.66 | 8.83  | 8.93  | 0.904837415 | 28  | 4  | 11.52263374 | 13.79310345 |
| MS3_05360 | 0.67 | 0.79 | 0.53 | 0.41 | 0.64 | 8.13  | 8.2   | 0.932393809 | 0   | 0  | 0           | 0           |
| MS3_07565 | 0.67 | 0.79 | 0.54 | 0.44 | 0.64 | 8.35  | 8.29  | 1.061836554 | 2   | 0  | 0.823045267 | 0           |
| MS3_08432 | 0.67 | 0.79 | 0.52 | 0.42 | 0.63 | 9.16  | 9.26  | 0.904837416 | 50  | 5  | 20.57613169 | 17.24137931 |
| MS3_08871 | 0.67 | 0.79 | 0.52 | 0.43 | 0.61 | 8.9   | 8.86  | 1.040810776 | 18  | 0  | 7.407407407 | 0           |
| MS3_04817 | 0.68 | 0.79 | 0.56 | 0.45 | 0.66 | 8.01  | 8.07  | 0.941764522 | 3   | 0  | 1.234567901 | 0           |
| MS3_05958 | 0.68 | 0.8  | 0.53 | 0.43 | 0.63 | 8.79  | 8.87  | 0.923116343 | 30  | 2  | 12.34567901 | 6.896551724 |
| MS3_04355 | 0.69 | 0.8  | 0.49 | 0.39 | 0.59 | 8.32  | 8.38  | 0.941764527 | 2   | 0  | 0.823045267 | 0           |
| MS3_04584 | 0.69 | 0.81 | 0.55 | 0.44 | 0.65 | 10.33 | 10.39 | 0.941764533 | 204 | 25 | 83.95061728 | 86.20689655 |
| MS3_04799 | 0.69 | 0.8  | 0.5  | 0.39 | 0.62 | 7.13  | 7.26  | 0.878095302 | 14  | 2  | 5.761316872 | 6.896551724 |
| MS3_01600 | 0.7  | 0.82 | 0.53 | 0.43 | 0.63 | 8.48  | 8.54  | 0.941764529 | 9   | 0  | 3.703703704 | 0           |
| MS3_03079 | 0.7  | 0.82 | 0.51 | 0.4  | 0.62 | 9.29  | 9.17  | 1.127496854 | 105 | 12 | 43.20987654 | 41.37931034 |
| MS3_05332 | 0.7  | 0.81 | 0.58 | 0.48 | 0.69 | 9.27  | 9.34  | 0.932393819 | 50  | 5  | 20.57613169 | 17.24137931 |
| MS3_08162 | 0.7  | 0.81 | 0.53 | 0.43 | 0.62 | 9.14  | 9.22  | 0.923116345 | 57  | 6  | 23.45679012 | 20.68965517 |
| MS3_11076 | 0.7  | 0.82 | 0.49 | 0.38 | 0.6  | 8.92  | 8.86  | 1.061836549 | 30  | 0  | 12.34567901 | 0           |
| MS3_02396 | 0.71 | 0.82 | 0.52 | 0.41 | 0.63 | 8.83  | 8.88  | 0.951229423 | 13  | 0  | 5.349794239 | 0           |
| MS3_06257 | 0.71 | 0.83 | 0.54 | 0.41 | 0.66 | 8.19  | 8.3   | 0.895834122 | 9   | 2  | 3.703703704 | 6.896551724 |
| MS3_06690 | 0.71 | 0.82 | 0.49 | 0.38 | 0.61 | 10.72 | 10.82 | 0.904837418 | 214 | 23 | 88.06584362 | 79.31034483 |
| MS3_07420 | 0.71 | 0.82 | 0.5  | 0.37 | 0.62 | 7.14  | 7.22  | 0.923116261 | 1   | 1  | 0.411522634 | 3.448275862 |
| MS3_09793 | 0.71 | 0.83 | 0.53 | 0.41 | 0.64 | 8.49  | 8.44  | 1.051271101 | 2   | 0  | 0.823045267 | 0           |
| MS3_10588 | 0.71 | 0.82 | 0.58 | 0.46 | 0.7  | 8.36  | 8.52  | 0.852143776 | 42  | 7  | 17.28395062 | 24.13793103 |
| MS3_01964 | 0.72 | 0.83 | 0.48 | 0.37 | 0.6  | 8.21  | 8.27  | 0.941764526 | 0   | 0  | 0           | 0           |

|           |      |      |      |      |      |       |       |             |     |    |             |             |
|-----------|------|------|------|------|------|-------|-------|-------------|-----|----|-------------|-------------|
| MS3_06108 | 0.72 | 0.83 | 0.52 | 0.42 | 0.63 | 8.47  | 8.56  | 0.913931179 | 35  | 1  | 14.40329218 | 3.448275862 |
| MS3_08618 | 0.72 | 0.83 | 0.5  | 0.39 | 0.61 | 8.8   | 8.75  | 1.051271099 | 12  | 0  | 4.938271605 | 0           |
| MS3_09188 | 0.72 | 0.83 | 0.51 | 0.4  | 0.62 | 10.75 | 10.65 | 1.105170918 | 239 | 26 | 98.35390947 | 89.65517241 |
| MS3_01780 | 0.73 | 0.84 | 0.52 | 0.42 | 0.62 | 6.17  | 6.14  | 1.030454813 | 0   | 0  | 0           | 0           |
| MS3_04100 | 0.73 | 0.84 | 0.52 | 0.4  | 0.64 | 8.11  | 8.06  | 1.051271106 | 2   | 0  | 0.823045267 | 0           |
| MS3_05427 | 0.73 | 0.84 | 0.54 | 0.44 | 0.64 | 8.3   | 8.35  | 0.951229419 | 7   | 1  | 2.880658436 | 3.448275862 |
| MS3_05437 | 0.73 | 0.84 | 0.54 | 0.43 | 0.65 | 7.85  | 7.89  | 0.960789428 | 2   | 0  | 0.823045267 | 0           |
| MS3_07617 | 0.73 | 0.84 | 0.52 | 0.39 | 0.65 | 8.39  | 8.32  | 1.07250819  | 3   | 0  | 1.234567901 | 0           |
| MS3_07988 | 0.73 | 0.84 | 0.5  | 0.4  | 0.6  | 10.35 | 10.44 | 0.913931185 | 162 | 20 | 66.66666667 | 68.96551724 |
| MS3_08539 | 0.73 | 0.84 | 0.49 | 0.38 | 0.6  | 8.18  | 8.13  | 1.051271105 | 0   | 0  | 0           | 0           |
| MS3_00294 | 0.74 | 0.84 | 0.52 | 0.42 | 0.63 | 8.43  | 8.47  | 0.960789436 | 3   | 0  | 1.234567901 | 0           |
| MS3_02318 | 0.74 | 0.84 | 0.51 | 0.4  | 0.62 | 9.25  | 9.14  | 1.116278073 | 102 | 11 | 41.97530864 | 37.93103448 |
| MS3_03817 | 0.74 | 0.85 | 0.55 | 0.45 | 0.64 | 9.24  | 9.15  | 1.094174286 | 104 | 7  | 42.79835391 | 24.13793103 |
| MS3_07280 | 0.74 | 0.85 | 0.51 | 0.4  | 0.63 | 8.11  | 8.06  | 1.051271106 | 0   | 0  | 0           | 0           |
| MS3_01952 | 0.75 | 0.85 | 0.5  | 0.39 | 0.61 | 8.5   | 8.46  | 1.040810778 | 11  | 1  | 4.526748971 | 3.448275862 |
| MS3_04582 | 0.75 | 0.85 | 0.48 | 0.35 | 0.61 | 8.87  | 8.92  | 0.951229423 | 12  | 4  | 4.938271605 | 13.79310345 |
| MS3_05283 | 0.75 | 0.85 | 0.52 | 0.42 | 0.62 | 8.45  | 8.4   | 1.051271101 | 19  | 0  | 7.818930041 | 0           |
| MS3_06592 | 0.75 | 0.85 | 0.53 | 0.43 | 0.64 | 7.05  | 6.99  | 1.061836648 | 5   | 1  | 2.057613169 | 3.448275862 |
| MS3_00668 | 0.76 | 0.86 | 0.49 | 0.38 | 0.6  | 10.35 | 10.27 | 1.083287068 | 185 | 22 | 76.13168724 | 75.86206897 |
| MS3_02085 | 0.76 | 0.86 | 0.52 | 0.41 | 0.63 | 9.86  | 9.78  | 1.083287068 | 171 | 18 | 70.37037037 | 62.06896552 |
| MS3_04206 | 0.76 | 0.86 | 0.51 | 0.41 | 0.6  | 8.41  | 8.44  | 0.970445531 | 2   | 0  | 0.823045267 | 0           |
| MS3_06868 | 0.76 | 0.86 | 0.5  | 0.4  | 0.61 | 9.75  | 9.82  | 0.932393819 | 125 | 12 | 51.44032922 | 41.37931034 |
| MS3_07195 | 0.76 | 0.86 | 0.51 | 0.41 | 0.61 | 7.84  | 7.79  | 1.051271114 | 2   | 0  | 0.823045267 | 0           |
| MS3_09240 | 0.76 | 0.86 | 0.5  | 0.41 | 0.6  | 8.39  | 8.36  | 1.030454537 | 11  | 0  | 4.526748971 | 0           |
| MS3_09434 | 0.76 | 0.86 | 0.49 | 0.39 | 0.6  | 8.86  | 8.93  | 0.932393817 | 23  | 1  | 9.465020576 | 3.448275862 |
| MS3_11074 | 0.76 | 0.85 | 0.5  | 0.41 | 0.6  | 7.96  | 7.92  | 1.040810785 | 4   | 0  | 1.646090535 | 0           |
| MS3_01664 | 0.77 | 0.86 | 0.51 | 0.4  | 0.63 | 8.12  | 8.17  | 0.951229416 | 5   | 1  | 2.057613169 | 3.448275862 |
| MS3_05587 | 0.77 | 0.86 | 0.53 | 0.4  | 0.66 | 7     | 7.07  | 0.932393719 | 3   | 1  | 1.234567901 | 3.448275862 |
| MS3_06944 | 0.77 | 0.86 | 0.55 | 0.45 | 0.64 | 9.56  | 9.59  | 0.970445533 | 87  | 6  | 35.80246914 | 20.68965517 |
| MS3_07520 | 0.77 | 0.86 | 0.53 | 0.41 | 0.65 | 8.18  | 8.23  | 0.951229417 | 5   | 1  | 2.057613169 | 3.448275862 |
| MS3_08440 | 0.77 | 0.86 | 0.55 | 0.43 | 0.67 | 8.86  | 8.92  | 0.941764531 | 28  | 3  | 11.52263374 | 10.34482759 |
| MS3_08479 | 0.77 | 0.86 | 0.51 | 0.43 | 0.6  | 9.48  | 9.44  | 1.040810775 | 82  | 5  | 33.74485597 | 17.24137931 |
| MS3_07831 | 0.78 | 0.87 | 0.5  | 0.38 | 0.61 | 8.6   | 8.64  | 0.960789437 | 6   | 1  | 2.469135802 | 3.448275862 |
| MS3_09613 | 0.78 | 0.87 | 0.5  | 0.41 | 0.59 | 9.6   | 9.57  | 1.030454534 | 83  | 4  | 34.1563786  | 13.79310345 |
| MS3_10194 | 0.78 | 0.87 | 0.54 | 0.42 | 0.66 | 8.35  | 8.26  | 1.094174296 | 32  | 4  | 13.16872428 | 13.79310345 |
| MS3_10472 | 0.78 | 0.87 | 0.49 | 0.37 | 0.6  | 8.53  | 8.57  | 0.960789436 | 4   | 0  | 1.646090535 | 0           |
| MS3_02453 | 0.79 | 0.88 | 0.53 | 0.42 | 0.64 | 7.76  | 7.8   | 0.960789426 | 1   | 0  | 0.411522634 | 0           |



|           |      |      |      |      |      |       |       |             |     |    |             |             |
|-----------|------|------|------|------|------|-------|-------|-------------|-----|----|-------------|-------------|
| MS3_07405 | 0.79 | 0.88 | 0.53 | 0.4  | 0.65 | 8.33  | 8.27  | 1.061836554 | 15  | 3  | 6.172839506 | 10.34482759 |
| MS3_00859 | 0.8  | 0.88 | 0.53 | 0.41 | 0.65 | 6.39  | 6.34  | 1.051271408 | 4   | 0  | 1.646090535 | 0           |
| MS3_02465 | 0.8  | 0.88 | 0.51 | 0.39 | 0.62 | 7.4   | 7.44  | 0.960789412 | 0   | 0  | 0           | 0           |
| MS3_03192 | 0.8  | 0.88 | 0.53 | 0.43 | 0.62 | 8.21  | 8.24  | 0.970445529 | 13  | 0  | 5.349794239 | 0           |
| MS3_08444 | 0.8  | 0.88 | 0.5  | 0.41 | 0.59 | 8.92  | 8.89  | 1.030454535 | 25  | 0  | 10.28806584 | 0           |
| MS3_08504 | 0.8  | 0.88 | 0.53 | 0.41 | 0.64 | 8.18  | 8.22  | 0.960789433 | 4   | 0  | 1.646090535 | 0           |
| MS3_03856 | 0.81 | 0.89 | 0.5  | 0.41 | 0.6  | 8.45  | 8.48  | 0.970445531 | 1   | 0  | 0.411522634 | 0           |
| MS3_04221 | 0.81 | 0.89 | 0.53 | 0.42 | 0.64 | 8.71  | 8.67  | 1.040810777 | 5   | 1  | 2.057613169 | 3.448275862 |
| MS3_08337 | 0.81 | 0.89 | 0.5  | 0.4  | 0.61 | 7.46  | 7.5   | 0.960789415 | 1   | 1  | 0.411522634 | 3.448275862 |
| MS3_08503 | 0.81 | 0.89 | 0.5  | 0.4  | 0.61 | 7.48  | 7.45  | 1.030454554 | 0   | 0  | 0           | 0           |
| MS3_00203 | 0.82 | 0.89 | 0.5  | 0.38 | 0.61 | 8.67  | 8.63  | 1.040810777 | 9   | 1  | 3.703703704 | 3.448275862 |
| MS3_00353 | 0.82 | 0.89 | 0.57 | 0.47 | 0.68 | 9.79  | 9.85  | 0.941764533 | 136 | 19 | 55.96707819 | 65.51724138 |
| MS3_01972 | 0.82 | 0.89 | 0.52 | 0.38 | 0.65 | 8.17  | 8.22  | 0.951229417 | 4   | 0  | 1.646090535 | 0           |
| MS3_01988 | 0.82 | 0.89 | 0.54 | 0.41 | 0.67 | 9.62  | 9.53  | 1.094174285 | 96  | 11 | 39.50617284 | 37.93103448 |
| MS3_02237 | 0.82 | 0.89 | 0.52 | 0.43 | 0.61 | 8.64  | 8.61  | 1.030454536 | 21  | 1  | 8.641975309 | 3.448275862 |
| MS3_07650 | 0.82 | 0.89 | 0.51 | 0.41 | 0.6  | 10.29 | 10.24 | 1.051271097 | 160 | 19 | 65.8436214  | 65.51724138 |
| MS3_07822 | 0.82 | 0.89 | 0.5  | 0.38 | 0.61 | 7.47  | 7.51  | 0.960789415 | 1   | 0  | 0.411522634 | 0           |
| MS3_07885 | 0.82 | 0.89 | 0.5  | 0.39 | 0.61 | 8.17  | 8.14  | 1.030454539 | 2   | 0  | 0.823045267 | 0           |
| MS3_05939 | 0.83 | 0.9  | 0.52 | 0.41 | 0.63 | 8.09  | 8.12  | 0.970445528 | 0   | 0  | 0           | 0           |
| MS3_08159 | 0.83 | 0.9  | 0.54 | 0.44 | 0.64 | 8.22  | 8.25  | 0.970445529 | 7   | 0  | 2.880658436 | 0           |
| MS3_01240 | 0.84 | 0.91 | 0.5  | 0.4  | 0.6  | 8.59  | 8.62  | 0.970445532 | 19  | 1  | 7.818930041 | 3.448275862 |
| MS3_02088 | 0.84 | 0.9  | 0.47 | 0.35 | 0.58 | 8.11  | 8.14  | 0.970445528 | 3   | 0  | 1.234567901 | 0           |
| MS3_07464 | 0.84 | 0.9  | 0.51 | 0.4  | 0.63 | 8.88  | 8.83  | 1.051271099 | 26  | 1  | 10.69958848 | 3.448275862 |
| MS3_07729 | 0.84 | 0.9  | 0.5  | 0.37 | 0.63 | 8.28  | 8.24  | 1.04081078  | 8   | 0  | 3.29218107  | 0           |
| MS3_10116 | 0.84 | 0.91 | 0.5  | 0.38 | 0.62 | 8.87  | 8.83  | 1.040810776 | 24  | 3  | 9.87654321  | 10.34482759 |
| MS3_10572 | 0.84 | 0.91 | 0.53 | 0.42 | 0.63 | 9.35  | 9.4   | 0.951229424 | 81  | 10 | 33.33333333 | 34.48275862 |
| MS3_04266 | 0.85 | 0.91 | 0.54 | 0.43 | 0.64 | 8.96  | 8.94  | 1.020201341 | 16  | 1  | 6.58436214  | 3.448275862 |
| MS3_05125 | 0.85 | 0.91 | 0.47 | 0.35 | 0.59 | 8.02  | 7.95  | 1.072508199 | 34  | 6  | 13.99176955 | 20.68965517 |
| MS3_06147 | 0.85 | 0.91 | 0.5  | 0.39 | 0.62 | 7.79  | 7.76  | 1.030454545 | 0   | 0  | 0           | 0           |
| MS3_07651 | 0.85 | 0.91 | 0.51 | 0.41 | 0.61 | 8.61  | 8.65  | 0.960789437 | 30  | 2  | 12.34567901 | 6.896551724 |
| MS3_10161 | 0.85 | 0.91 | 0.5  | 0.4  | 0.61 | 8.4   | 8.38  | 1.020201342 | 3   | 0  | 1.234567901 | 0           |
| MS3_01124 | 0.86 | 0.92 | 0.49 | 0.39 | 0.58 | 8.66  | 8.64  | 1.020201341 | 5   | 0  | 2.057613169 | 0           |
| MS3_05222 | 0.86 | 0.92 | 0.5  | 0.39 | 0.6  | 9.79  | 9.81  | 0.980198673 | 130 | 14 | 53.49794239 | 48.27586207 |
| MS3_06248 | 0.86 | 0.91 | 0.48 | 0.39 | 0.58 | 8.81  | 8.85  | 0.960789438 | 29  | 1  | 11.93415638 | 3.448275862 |
| MS3_08276 | 0.86 | 0.91 | 0.51 | 0.4  | 0.63 | 8.95  | 8.91  | 1.040810776 | 48  | 5  | 19.75308642 | 17.24137931 |
| MS3_10044 | 0.86 | 0.92 | 0.55 | 0.45 | 0.66 | 6.35  | 6.38  | 0.970445361 | 1   | 0  | 0.411522634 | 0           |
| MS3_03726 | 0.87 | 0.92 | 0.5  | 0.39 | 0.62 | 8.69  | 8.67  | 1.020201341 | 14  | 2  | 5.761316872 | 6.896551724 |

|           |      |      |      |      |      |       |       |             |     |    |             |             |
|-----------|------|------|------|------|------|-------|-------|-------------|-----|----|-------------|-------------|
| MS3_03800 | 0.87 | 0.92 | 0.48 | 0.36 | 0.6  | 7.59  | 7.64  | 0.951229401 | 1   | 1  | 0.411522634 | 3.448275862 |
| MS3_05192 | 0.87 | 0.92 | 0.5  | 0.38 | 0.63 | 8.61  | 8.57  | 1.040810777 | 11  | 2  | 4.526748971 | 6.896551724 |
| MS3_06348 | 0.87 | 0.92 | 0.54 | 0.43 | 0.66 | 9.17  | 9.2   | 0.970445533 | 64  | 10 | 26.33744856 | 34.48275862 |
| MS3_09489 | 0.87 | 0.92 | 0.5  | 0.39 | 0.61 | 8.98  | 8.93  | 1.051271098 | 55  | 5  | 22.63374486 | 17.24137931 |
| MS3_02307 | 0.88 | 0.93 | 0.52 | 0.42 | 0.62 | 9.22  | 9.19  | 1.030454535 | 62  | 4  | 25.51440329 | 13.79310345 |
| MS3_03140 | 0.88 | 0.93 | 0.52 | 0.4  | 0.63 | 9.61  | 9.59  | 1.02020134  | 81  | 11 | 33.33333333 | 37.93103448 |
| MS3_03226 | 0.88 | 0.93 | 0.51 | 0.4  | 0.63 | 8.22  | 8.2   | 1.020201343 | 0   | 0  | 0           | 0           |
| MS3_03577 | 0.88 | 0.93 | 0.52 | 0.4  | 0.65 | 8.25  | 8.22  | 1.030454538 | 1   | 0  | 0.411522634 | 0           |
| MS3_00800 | 0.89 | 0.93 | 0.5  | 0.39 | 0.61 | 7.68  | 7.66  | 1.020201349 | 2   | 0  | 0.823045267 | 0           |
| MS3_07347 | 0.89 | 0.93 | 0.54 | 0.42 | 0.65 | 8.67  | 8.7   | 0.970445532 | 15  | 2  | 6.172839506 | 6.896551724 |
| MS3_09569 | 0.89 | 0.93 | 0.53 | 0.4  | 0.65 | 8.73  | 8.75  | 0.980198672 | 11  | 1  | 4.526748971 | 3.448275862 |
| MS3_09652 | 0.89 | 0.93 | 0.52 | 0.42 | 0.62 | 8.07  | 8.08  | 0.990049832 | 1   | 0  | 0.411522634 | 0           |
| MS3_11428 | 0.89 | 0.93 | 0.53 | 0.42 | 0.65 | 9.06  | 9.08  | 0.980198673 | 19  | 2  | 7.818930041 | 6.896551724 |
| MS3_01364 | 0.9  | 0.94 | 0.5  | 0.39 | 0.61 | 10.19 | 10.23 | 0.960789439 | 151 | 16 | 62.1399177  | 55.17241379 |
| MS3_04540 | 0.9  | 0.94 | 0.52 | 0.41 | 0.62 | 6.65  | 6.64  | 1.010050201 | 3   | 0  | 1.234567901 | 0           |
| MS3_05326 | 0.9  | 0.94 | 0.5  | 0.39 | 0.61 | 7.87  | 7.89  | 0.980198668 | 1   | 0  | 0.411522634 | 0           |
| MS3_03863 | 0.91 | 0.95 | 0.52 | 0.44 | 0.61 | 7.65  | 7.64  | 1.010050172 | 0   | 0  | 0           | 0           |
| MS3_04680 | 0.91 | 0.95 | 0.49 | 0.4  | 0.58 | 7.92  | 7.94  | 0.980198668 | 23  | 1  | 9.465020576 | 3.448275862 |
| MS3_09778 | 0.91 | 0.95 | 0.51 | 0.41 | 0.61 | 8.03  | 8.01  | 1.020201344 | 2   | 0  | 0.823045267 | 0           |
| MS3_02202 | 0.92 | 0.96 | 0.51 | 0.41 | 0.61 | 9.09  | 9.08  | 1.010050167 | 30  | 1  | 12.34567901 | 3.448275862 |
| MS3_03933 | 0.92 | 0.96 | 0.49 | 0.37 | 0.62 | 8.7   | 8.69  | 1.010050168 | 11  | 1  | 4.526748971 | 3.448275862 |
| MS3_06649 | 0.92 | 0.95 | 0.53 | 0.42 | 0.64 | 8.66  | 8.68  | 0.980198672 | 23  | 2  | 9.465020576 | 6.896551724 |
| MS3_11273 | 0.92 | 0.95 | 0.5  | 0.4  | 0.6  | 8.65  | 8.64  | 1.010050168 | 7   | 0  | 2.880658436 | 0           |
| MS3_03231 | 0.93 | 0.96 | 0.51 | 0.41 | 0.61 | 7.98  | 7.97  | 1.010050169 | 2   | 0  | 0.823045267 | 0           |
| MS3_04364 | 0.93 | 0.96 | 0.54 | 0.43 | 0.65 | 9.35  | 9.33  | 1.02020134  | 77  | 9  | 31.6872428  | 31.03448276 |
| MS3_05913 | 0.93 | 0.96 | 0.52 | 0.41 | 0.63 | 8.83  | 8.85  | 0.980198672 | 29  | 3  | 11.93415638 | 10.34482759 |
| MS3_08042 | 0.93 | 0.96 | 0.52 | 0.39 | 0.64 | 8.74  | 8.76  | 0.980198672 | 18  | 4  | 7.407407407 | 13.79310345 |
| MS3_09465 | 0.93 | 0.96 | 0.48 | 0.38 | 0.59 | 7.64  | 7.63  | 1.010050172 | 1   | 0  | 0.411522634 | 0           |
| MS3_11239 | 0.93 | 0.96 | 0.51 | 0.41 | 0.61 | 7.79  | 7.8   | 0.99004983  | 1   | 0  | 0.411522634 | 0           |
| MS3_00931 | 0.94 | 0.96 | 0.5  | 0.42 | 0.58 | 9.79  | 9.8   | 0.990049834 | 111 | 9  | 45.67901235 | 31.03448276 |
| MS3_04275 | 0.94 | 0.96 | 0.48 | 0.38 | 0.58 | 8.76  | 8.76  | 1           | 10  | 0  | 4.115226337 | 0           |
| MS3_06551 | 0.94 | 0.96 | 0.51 | 0.39 | 0.62 | 8.66  | 8.65  | 1.010050168 | 14  | 3  | 5.761316872 | 10.34482759 |
| MS3_07125 | 0.94 | 0.96 | 0.51 | 0.41 | 0.6  | 8.42  | 8.42  | 1           | 4   | 0  | 1.646090535 | 0           |
| MS3_08839 | 0.94 | 0.96 | 0.52 | 0.42 | 0.61 | 8.43  | 8.42  | 1.010050168 | 12  | 0  | 4.938271605 | 0           |
| MS3_09640 | 0.94 | 0.96 | 0.53 | 0.44 | 0.62 | 9.12  | 9.1   | 1.020201341 | 61  | 4  | 25.10288066 | 13.79310345 |
| MS3_01585 | 0.95 | 0.97 | 0.52 | 0.41 | 0.62 | 8.52  | 8.52  | 1           | 1   | 0  | 0.411522634 | 0           |
| MS3_04011 | 0.95 | 0.97 | 0.54 | 0.41 | 0.66 | 7.84  | 7.86  | 0.980198667 | 14  | 4  | 5.761316872 | 13.79310345 |

|           |      |      |      |      |      |      |      |             |    |   |             |             |
|-----------|------|------|------|------|------|------|------|-------------|----|---|-------------|-------------|
| MS3_05047 | 0.95 | 0.97 | 0.51 | 0.41 | 0.61 | 9.16 | 9.17 | 0.990049834 | 59 | 5 | 24.27983539 | 17.24137931 |
| MS3_06400 | 0.95 | 0.97 | 0.52 | 0.39 | 0.64 | 8.17 | 8.18 | 0.990049832 | 2  | 0 | 0.823045267 | 0           |
| MS3_00006 | 0.96 | 0.97 | 0.51 | 0.4  | 0.63 | 7.9  | 7.9  | 1           | 1  | 0 | 0.411522634 | 0           |
| MS3_02952 | 0.96 | 0.97 | 0.53 | 0.42 | 0.63 | 7.04 | 7.04 | 1           | 1  | 1 | 0.411522634 | 3.448275862 |
| MS3_04474 | 0.96 | 0.97 | 0.51 | 0.38 | 0.63 | 8.5  | 8.5  | 1           | 5  | 0 | 2.057613169 | 0           |
| MS3_06729 | 0.96 | 0.97 | 0.51 | 0.39 | 0.62 | 8.27 | 8.27 | 1           | 7  | 0 | 2.880658436 | 0           |
| MS3_07299 | 0.96 | 0.98 | 0.51 | 0.39 | 0.63 | 7.76 | 7.77 | 0.99004983  | 3  | 1 | 1.234567901 | 3.448275862 |
| MS3_03615 | 0.97 | 0.98 | 0.57 | 0.44 | 0.7  | 7.56 | 7.57 | 0.990049828 | 27 | 3 | 11.11111111 | 10.34482759 |
| MS3_06740 | 0.97 | 0.98 | 0.5  | 0.39 | 0.62 | 8.06 | 8.06 | 1           | 0  | 0 | 0           | 0           |
| MS3_08655 | 0.97 | 0.98 | 0.55 | 0.42 | 0.69 | 7.65 | 7.66 | 0.990049829 | 13 | 3 | 5.349794239 | 10.34482759 |
| MS3_09333 | 0.97 | 0.98 | 0.52 | 0.41 | 0.64 | 8.62 | 8.63 | 0.990049833 | 9  | 0 | 3.703703704 | 0           |
| MS3_02460 | 0.98 | 0.98 | 0.51 | 0.4  | 0.62 | 8.71 | 8.72 | 0.990049833 | 4  | 0 | 1.646090535 | 0           |
| MS3_08216 | 0.98 | 0.99 | 0.54 | 0.44 | 0.64 | 7.27 | 7.27 | 1           | 0  | 0 | 0           | 0           |
| MS3_09473 | 0.98 | 0.98 | 0.51 | 0.41 | 0.61 | 9.26 | 9.27 | 0.990049834 | 67 | 8 | 27.57201646 | 27.5862069  |
| MS3_02593 | 0.99 | 0.99 | 0.5  | 0.39 | 0.62 | 7.97 | 7.97 | 1           | 2  | 0 | 0.823045267 | 0           |
| MS3_05686 | 0.99 | 0.99 | 0.51 | 0.41 | 0.62 | 9.59 | 9.58 | 1.010050167 | 84 | 8 | 34.56790123 | 27.5862069  |
| MS3_00499 | 1    | 1    | 0.52 | 0.41 | 0.63 | 8.51 | 8.51 | 1           | 37 | 3 | 15.22633745 | 10.34482759 |
| MS3_03511 | 1    | 1    | 0.5  | 0.41 | 0.6  | 8.22 | 8.22 | 1           | 2  | 0 | 0.823045267 | 0           |

\*WormBase ParaSite online database, version 14 [https://parasite.wormbase.org/Schistosoma\\_haematobium\\_prjna78265/Info/Index/](https://parasite.wormbase.org/Schistosoma_haematobium_prjna78265/Info/Index/)

**Table S3. Fold change of IgG responses between infected and non-infected (*S. haematobium*-endemic) populations resulting from urine sample probing of *S. haematobium* protein arrays.**

| Antigen<br>(WBPS14*<br>accession) | P value     | FDR       | AUC  | AUC<br>Lower<br>CI | AUC<br>Upper<br>CI | Mean<br>infected | Mean<br>non<br>infected | Fold<br>Change | Positive<br>infected | Positive<br>non<br>infected | Positive<br>infected<br>(%) | Positive<br>non<br>infected<br>(%) |
|-----------------------------------|-------------|-----------|------|--------------------|--------------------|------------------|-------------------------|----------------|----------------------|-----------------------------|-----------------------------|------------------------------------|
| MS3_10385                         | 4.20E-14    | 4.20E-11  | 0.93 | 0.85               | 1                  | 12               | 7.5                     | 90.01716       | 103                  | 2                           | 91.15044                    | 8.33333333                         |
| MS3_06193                         | 4.30E-10    | 1.8E-07   | 0.83 | 0.75               | 0.91               | 11.14            | 7.75                    | 29.66596       | 90                   | 7                           | 79.64602                    | 29.1666667                         |
| MS3_10186                         | 5.40E-10    | 1.8E-07   | 0.88 | 0.8                | 0.97               | 11.68            | 7.73                    | 51.93538       | 99                   | 6                           | 87.61062                    | 25                                 |
| MS3_02553                         | 0.00000017  | 0.0000043 | 0.86 | 0.77               | 0.94               | 10.79            | 8.87                    | 6.820959       | 107                  | 18                          | 94.69027                    | 75                                 |
| MS3_01466                         | 0.000000096 | 0.000019  | 0.75 | 0.66               | 0.84               | 9.46             | 6.96                    | 12.1825        | 59                   | 7                           | 52.21239                    | 29.1666667                         |
| MS3_07702                         | 0.00000012  | 0.00002   | 0.76 | 0.67               | 0.85               | 8.94             | 7.43                    | 4.526732       | 57                   | 3                           | 50.44248                    | 12.5                               |
| MS3_04688                         | 0.00000054  | 0.000077  | 0.76 | 0.66               | 0.86               | 8.38             | 6.96                    | 4.137124       | 46                   | 2                           | 40.70796                    | 8.33333333                         |
| MS3_00996                         | 0.00000075  | 0.000086  | 0.7  | 0.61               | 0.78               | 9.62             | 8.87                    | 2.117          | 98                   | 22                          | 86.72566                    | 91.6666667                         |
| MS3_09198                         | 0.00000078  | 0.000086  | 0.83 | 0.73               | 0.92               | 10.65            | 8.65                    | 7.389056       | 103                  | 11                          | 91.15044                    | 45.83333333                        |
| MS3_01597                         | 0.0000056   | 0.00056   | 0.78 | 0.69               | 0.86               | 6.94             | 7.71                    | 0.463013       | 5                    | 5                           | 4.424779                    | 20.83333333                        |
| MS3_07968                         | 0.0000094   | 0.00084   | 0.78 | 0.69               | 0.87               | 7.02             | 8.41                    | 0.249075       | 19                   | 13                          | 16.81416                    | 54.1666667                         |
| MS3_07481                         | 0.000014    | 0.0012    | 0.74 | 0.63               | 0.85               | 9.43             | 7.82                    | 5.002812       | 77                   | 9                           | 68.14159                    | 37.5                               |
| MS3_09207                         | 0.000018    | 0.0013    | 0.68 | 0.57               | 0.78               | 8.11             | 7.02                    | 2.974276       | 39                   | 2                           | 34.51327                    | 8.33333333                         |
| MS3_00805                         | 0.000028    | 0.002     | 0.77 | 0.68               | 0.86               | 7.01             | 8.58                    | 0.208045       | 23                   | 15                          | 20.35398                    | 62.5                               |
| MS3_07178                         | 0.000032    | 0.0021    | 0.66 | 0.57               | 0.76               | 7.35             | 6.33                    | 2.773202       | 32                   | 0                           | 28.31858                    | 0                                  |
| MS3_07693                         | 0.000043    | 0.0027    | 0.7  | 0.6                | 0.81               | 10.11            | 10.98                   | 0.418952       | 99                   | 24                          | 87.61062                    | 100                                |
| MS3_05950                         | 0.000064    | 0.0036    | 0.72 | 0.62               | 0.82               | 9.04             | 7.31                    | 5.640656       | 64                   | 7                           | 56.63717                    | 29.1666667                         |
| MS3_02428                         | 0.000065    | 0.0036    | 0.75 | 0.66               | 0.85               | 7.92             | 7.26                    | 1.934793       | 33                   | 1                           | 29.20354                    | 4.16666667                         |
| MS3_05350                         | 0.000073    | 0.0036    | 0.77 | 0.66               | 0.89               | 7.23             | 8.19                    | 0.382893       | 13                   | 13                          | 11.50442                    | 54.1666667                         |
| MS3_07037                         | 0.000074    | 0.0036    | 0.74 | 0.63               | 0.85               | 7.58             | 8.33                    | 0.472366       | 19                   | 12                          | 16.81416                    | 50                                 |
| MS3_05192                         | 0.00008     | 0.0036    | 0.73 | 0.63               | 0.83               | 7.7              | 8.39                    | 0.501576       | 24                   | 10                          | 21.23894                    | 41.6666667                         |
| MS3_08283                         | 0.00008     | 0.0036    | 0.76 | 0.66               | 0.86               | 7.63             | 8.85                    | 0.29523        | 29                   | 15                          | 25.66372                    | 62.5                               |
| MS3_05024                         | 0.000084    | 0.0036    | 0.77 | 0.66               | 0.87               | 7.44             | 8.45                    | 0.364219       | 20                   | 13                          | 17.69912                    | 54.1666667                         |
| MS3_00180                         | 0.000089    | 0.0037    | 0.68 | 0.58               | 0.79               | 8.24             | 7.27                    | 2.637946       | 42                   | 2                           | 37.16814                    | 8.33333333                         |
| MS3_01257                         | 0.0001      | 0.0041    | 0.7  | 0.6                | 0.81               | 6.74             | 5.98                    | 2.138287       | 13                   | 0                           | 11.50442                    | 0                                  |
| MS3_04820                         | 0.00012     | 0.0045    | 0.77 | 0.66               | 0.88               | 8.86             | 7.81                    | 2.857652       | 83                   | 7                           | 73.45133                    | 29.1666667                         |
| MS3_05739                         | 0.00012     | 0.0045    | 0.77 | 0.67               | 0.87               | 6.31             | 7.1                     | 0.453844       | 1                    | 2                           | 0.884956                    | 8.33333333                         |
| MS3_01857                         | 0.00013     | 0.0045    | 0.75 | 0.65               | 0.84               | 9.57             | 8.36                    | 3.353485       | 96                   | 14                          | 84.95575                    | 58.33333333                        |
| MS3_08087                         | 0.00013     | 0.0045    | 0.77 | 0.65               | 0.89               | 7.66             | 8.71                    | 0.349938       | 26                   | 17                          | 23.00885                    | 70.83333333                        |
| MS3_07405                         | 0.00014     | 0.0045    | 0.73 | 0.62               | 0.83               | 7.61             | 8.43                    | 0.440432       | 23                   | 13                          | 20.35398                    | 54.1666667                         |
| MS3_03509                         | 0.00015     | 0.0049    | 0.74 | 0.64               | 0.84               | 9.44             | 8.38                    | 2.886371       | 90                   | 13                          | 79.64602                    | 54.1666667                         |

|           |         |        |      |      |      |      |      |          |     |    |          |            |
|-----------|---------|--------|------|------|------|------|------|----------|-----|----|----------|------------|
| MS3_09779 | 0.00017 | 0.0051 | 0.66 | 0.55 | 0.76 | 7.49 | 6.55 | 2.559986 | 30  | 0  | 26.54867 | 0          |
| MS3_01365 | 0.00019 | 0.0057 | 0.69 | 0.59 | 0.79 | 8.5  | 7.73 | 2.159767 | 57  | 6  | 50.44248 | 25         |
| MS3_05676 | 0.0002  | 0.0059 | 0.74 | 0.63 | 0.85 | 7.8  | 8.44 | 0.527292 | 25  | 13 | 22.12389 | 54.1666667 |
| MS3_00670 | 0.00021 | 0.0059 | 0.73 | 0.62 | 0.84 | 7.79 | 8.54 | 0.472366 | 33  | 13 | 29.20354 | 54.1666667 |
| MS3_02343 | 0.00024 | 0.0067 | 0.74 | 0.64 | 0.84 | 7.04 | 7.63 | 0.554327 | 5   | 4  | 4.424779 | 16.6666667 |
| MS3_00886 | 0.00028 | 0.0074 | 0.7  | 0.59 | 0.8  | 8.66 | 7.82 | 2.316367 | 63  | 8  | 55.75221 | 33.3333333 |
| MS3_03988 | 0.00041 | 0.01   | 0.75 | 0.64 | 0.86 | 7.02 | 7.78 | 0.467666 | 11  | 6  | 9.734513 | 25         |
| MS3_06551 | 0.00041 | 0.01   | 0.72 | 0.61 | 0.83 | 7.77 | 8.45 | 0.506617 | 26  | 13 | 23.00885 | 54.1666667 |
| MS3_01364 | 0.00052 | 0.013  | 0.66 | 0.57 | 0.76 | 7.67 | 6.77 | 2.459606 | 38  | 2  | 33.62832 | 8.33333333 |
| MS3_01749 | 0.00053 | 0.013  | 0.74 | 0.65 | 0.83 | 9.85 | 8.95 | 2.459603 | 105 | 19 | 92.92035 | 79.1666667 |
| MS3_02688 | 0.0006  | 0.014  | 0.74 | 0.62 | 0.86 | 9.35 | 8.22 | 3.095657 | 96  | 12 | 84.95575 | 50         |
| MS3_10485 | 0.00078 | 0.018  | 0.74 | 0.62 | 0.87 | 7.28 | 8.38 | 0.332871 | 16  | 14 | 14.15929 | 58.3333333 |
| MS3_00203 | 0.0008  | 0.018  | 0.71 | 0.6  | 0.82 | 7.65 | 8.32 | 0.511708 | 21  | 11 | 18.58407 | 45.8333333 |
| MS3_03140 | 0.0008  | 0.018  | 0.74 | 0.63 | 0.85 | 8.84 | 8.23 | 1.840431 | 89  | 9  | 78.76106 | 37.5       |
| MS3_09744 | 0.00085 | 0.018  | 0.72 | 0.61 | 0.83 | 8.99 | 7.93 | 2.886371 | 81  | 9  | 71.68142 | 37.5       |
| MS3_07988 | 0.00097 | 0.021  | 0.7  | 0.59 | 0.8  | 9.56 | 8.56 | 2.718282 | 94  | 16 | 83.18584 | 66.6666667 |
| MS3_07617 | 0.001   | 0.021  | 0.71 | 0.59 | 0.82 | 7.71 | 8.3  | 0.554327 | 24  | 11 | 21.23894 | 45.8333333 |
| MS3_08220 | 0.0011  | 0.021  | 0.73 | 0.61 | 0.86 | 9.06 | 7.99 | 2.91538  | 85  | 9  | 75.22124 | 37.5       |
| MS3_05959 | 0.0012  | 0.023  | 0.65 | 0.56 | 0.75 | 8.52 | 7.81 | 2.033992 | 52  | 4  | 46.0177  | 16.6666667 |
| MS3_06608 | 0.0012  | 0.023  | 0.71 | 0.6  | 0.83 | 7.5  | 8.31 | 0.444858 | 24  | 11 | 21.23894 | 45.8333333 |
| MS3_03603 | 0.0014  | 0.027  | 0.72 | 0.6  | 0.84 | 8.18 | 7.5  | 1.973878 | 50  | 4  | 44.24779 | 16.6666667 |
| MS3_09536 | 0.0014  | 0.027  | 0.72 | 0.59 | 0.85 | 6.63 | 7.39 | 0.467666 | 1   | 3  | 0.884956 | 12.5       |
| MS3_04827 | 0.0015  | 0.028  | 0.72 | 0.6  | 0.84 | 7.97 | 8.57 | 0.548812 | 33  | 16 | 29.20354 | 66.6666667 |
| MS3_07158 | 0.0015  | 0.027  | 0.7  | 0.59 | 0.81 | 7.89 | 8.48 | 0.554327 | 29  | 12 | 25.66372 | 50         |
| MS3_08094 | 0.0017  | 0.029  | 0.71 | 0.59 | 0.84 | 8.18 | 7.61 | 1.768267 | 39  | 3  | 34.51327 | 12.5       |
| MS3_04307 | 0.0017  | 0.029  | 0.65 | 0.54 | 0.76 | 8.18 | 7.11 | 2.915381 | 47  | 4  | 41.59292 | 16.6666667 |
| MS3_05952 | 0.0017  | 0.029  | 0.66 | 0.56 | 0.77 | 8.46 | 7.72 | 2.095936 | 56  | 4  | 49.55752 | 16.6666667 |
| MS3_06258 | 0.0017  | 0.029  | 0.71 | 0.59 | 0.83 | 7.55 | 8.28 | 0.481909 | 21  | 10 | 18.58407 | 41.6666667 |
| MS3_09521 | 0.0018  | 0.029  | 0.71 | 0.6  | 0.82 | 7.44 | 8.24 | 0.449329 | 17  | 11 | 15.04425 | 45.8333333 |
| MS3_01852 | 0.0019  | 0.031  | 0.71 | 0.62 | 0.81 | 6.5  | 7.05 | 0.576949 | 3   | 2  | 2.654867 | 8.33333333 |
| MS3_07972 | 0.0019  | 0.031  | 0.65 | 0.54 | 0.76 | 8.31 | 7.45 | 2.363161 | 51  | 7  | 45.13274 | 29.1666667 |
| MS3_06532 | 0.002   | 0.031  | 0.63 | 0.52 | 0.75 | 8.64 | 7.85 | 2.203397 | 56  | 7  | 49.55752 | 29.1666667 |
| MS3_09690 | 0.002   | 0.031  | 0.69 | 0.59 | 0.79 | 8.23 | 7.76 | 1.599994 | 54  | 3  | 47.78761 | 12.5       |
| MS3_01370 | 0.0021  | 0.031  | 0.66 | 0.56 | 0.77 | 8.11 | 7.31 | 2.225542 | 43  | 3  | 38.0531  | 12.5       |
| MS3_02314 | 0.0022  | 0.032  | 0.69 | 0.57 | 0.81 | 8.01 | 8.51 | 0.606531 | 37  | 15 | 32.74336 | 62.5       |
| MS3_00850 | 0.0022  | 0.032  | 0.7  | 0.58 | 0.82 | 7.74 | 8.27 | 0.588605 | 22  | 12 | 19.46903 | 50         |
| MS3_06825 | 0.0022  | 0.032  | 0.69 | 0.58 | 0.8  | 7.58 | 8.12 | 0.582748 | 19  | 8  | 16.81416 | 33.3333333 |

|           |        |       |      |      |      |      |      |          |    |    |          |            |
|-----------|--------|-------|------|------|------|------|------|----------|----|----|----------|------------|
| MS3_07612 | 0.0022 | 0.032 | 0.71 | 0.62 | 0.81 | 8.42 | 7.81 | 1.840432 | 67 | 7  | 59.29204 | 29.1666667 |
| MS3_10017 | 0.0022 | 0.032 | 0.73 | 0.61 | 0.85 | 7.63 | 8.4  | 0.463013 | 28 | 14 | 24.77876 | 58.3333333 |
| MS3_00277 | 0.0023 | 0.033 | 0.68 | 0.57 | 0.79 | 8.45 | 7.11 | 3.819046 | 52 | 5  | 46.0177  | 20.8333333 |
| MS3_08413 | 0.0026 | 0.036 | 0.68 | 0.57 | 0.78 | 7.86 | 7.34 | 1.682028 | 26 | 1  | 23.00885 | 4.1666667  |
| MS3_05002 | 0.0028 | 0.038 | 0.7  | 0.58 | 0.82 | 7.62 | 8.2  | 0.559898 | 23 | 11 | 20.35398 | 45.8333333 |
| MS3_10378 | 0.0029 | 0.038 | 0.7  | 0.58 | 0.81 | 7.48 | 8.06 | 0.559898 | 15 | 8  | 13.27434 | 33.3333333 |
| MS3_06898 | 0.0031 | 0.041 | 0.67 | 0.57 | 0.77 | 7.69 | 7.2  | 1.632317 | 25 | 0  | 22.12389 | 0          |
| MS3_06944 | 0.0032 | 0.042 | 0.71 | 0.59 | 0.84 | 8.34 | 7.42 | 2.509291 | 65 | 6  | 57.52212 | 25         |
| MS3_05913 | 0.0033 | 0.042 | 0.7  | 0.59 | 0.81 | 7.72 | 7.03 | 1.993717 | 29 | 2  | 25.66372 | 8.3333333  |
| MS3_08432 | 0.0035 | 0.044 | 0.7  | 0.58 | 0.82 | 8.16 | 7.35 | 2.247909 | 52 | 4  | 46.0177  | 16.6666667 |
| MS3_08811 | 0.0038 | 0.047 | 0.7  | 0.57 | 0.83 | 7.81 | 8.4  | 0.554327 | 21 | 12 | 18.58407 | 50         |
| MS3_05976 | 0.004  | 0.049 | 0.68 | 0.56 | 0.81 | 6.95 | 7.56 | 0.543351 | 3  | 4  | 2.654867 | 16.6666667 |
| MS3_09070 | 0.0045 | 0.055 | 0.64 | 0.54 | 0.75 | 6.73 | 6.14 | 1.803994 | 9  | 0  | 7.964602 | 0          |
| MS3_07594 | 0.0047 | 0.057 | 0.66 | 0.56 | 0.76 | 7.3  | 7.69 | 0.677057 | 11 | 1  | 9.734513 | 4.1666667  |
| MS3_10785 | 0.0048 | 0.058 | 0.71 | 0.58 | 0.83 | 6.66 | 7.27 | 0.54335  | 3  | 2  | 2.654867 | 8.3333333  |
| MS3_07763 | 0.0051 | 0.06  | 0.68 | 0.56 | 0.8  | 7.5  | 8.13 | 0.532592 | 17 | 9  | 15.04425 | 37.5       |
| MS3_01030 | 0.0052 | 0.061 | 0.67 | 0.56 | 0.78 | 7.58 | 6.91 | 1.954239 | 35 | 1  | 30.97345 | 4.1666667  |
| MS3_00361 | 0.0053 | 0.061 | 0.7  | 0.58 | 0.82 | 8.26 | 7.37 | 2.43513  | 58 | 4  | 51.32743 | 16.6666667 |
| MS3_01870 | 0.0053 | 0.061 | 0.69 | 0.56 | 0.82 | 7    | 7.71 | 0.491644 | 11 | 8  | 9.734513 | 33.3333333 |
| MS3_02256 | 0.0054 | 0.061 | 0.69 | 0.57 | 0.81 | 7.99 | 7.51 | 1.616075 | 31 | 4  | 27.43363 | 16.6666667 |
| MS3_01193 | 0.0055 | 0.061 | 0.65 | 0.53 | 0.78 | 7.65 | 7.04 | 1.840432 | 26 | 2  | 23.00885 | 8.3333333  |
| MS3_05425 | 0.0057 | 0.063 | 0.7  | 0.58 | 0.82 | 8.56 | 7.94 | 1.858928 | 74 | 8  | 65.48673 | 33.3333333 |
| MS3_05730 | 0.006  | 0.066 | 0.67 | 0.57 | 0.78 | 9.58 | 8.87 | 2.033991 | 95 | 17 | 84.0708  | 70.8333333 |
| No hits   | 0.0061 | 0.066 | 0.67 | 0.56 | 0.78 | 7.03 | 7.5  | 0.625002 | 7  | 2  | 6.19469  | 8.3333333  |
| MS3_05718 | 0.0063 | 0.067 | 0.67 | 0.57 | 0.78 | 7.12 | 6.38 | 2.09594  | 18 | 1  | 15.9292  | 4.1666667  |
| MS3_09700 | 0.0063 | 0.067 | 0.69 | 0.58 | 0.8  | 7.45 | 7.96 | 0.600495 | 16 | 9  | 14.15929 | 37.5       |
| MS3_05539 | 0.0065 | 0.068 | 0.68 | 0.57 | 0.8  | 7.49 | 8.17 | 0.506617 | 18 | 10 | 15.9292  | 41.6666667 |
| MS3_10083 | 0.0067 | 0.069 | 0.66 | 0.55 | 0.77 | 7.8  | 8.36 | 0.571209 | 35 | 11 | 30.97345 | 45.8333333 |
| MS3_01780 | 0.0068 | 0.069 | 0.69 | 0.58 | 0.8  | 6.04 | 6.49 | 0.637626 | 1  | 0  | 0.884956 | 0          |
| MS3_03041 | 0.0068 | 0.069 | 0.68 | 0.56 | 0.79 | 6.43 | 6.89 | 0.631283 | 1  | 0  | 0.884956 | 0          |
| MS3_01585 | 0.007  | 0.07  | 0.67 | 0.55 | 0.78 | 7.82 | 8.17 | 0.704688 | 20 | 8  | 17.69912 | 33.3333333 |
| MS3_02805 | 0.0071 | 0.07  | 0.68 | 0.56 | 0.8  | 8.12 | 7.48 | 1.896481 | 49 | 5  | 43.36283 | 20.8333333 |
| MS3_10184 | 0.0071 | 0.07  | 0.66 | 0.55 | 0.77 | 7.56 | 6.75 | 2.24791  | 36 | 3  | 31.85841 | 12.5       |
| MS3_01337 | 0.0072 | 0.07  | 0.67 | 0.55 | 0.78 | 8.02 | 7.44 | 1.786039 | 39 | 4  | 34.51327 | 16.6666667 |
| MS3_07347 | 0.0073 | 0.07  | 0.67 | 0.55 | 0.79 | 7.64 | 8.16 | 0.59452  | 19 | 9  | 16.81416 | 37.5       |
| MS3_02539 | 0.0077 | 0.073 | 0.67 | 0.55 | 0.78 | 7.66 | 8.19 | 0.588605 | 29 | 9  | 25.66372 | 37.5       |
| MS3_06736 | 0.0078 | 0.073 | 0.67 | 0.55 | 0.8  | 8.12 | 7.52 | 1.822119 | 42 | 5  | 37.16814 | 20.8333333 |

|           |        |       |      |      |      |       |      |          |     |    |          |            |
|-----------|--------|-------|------|------|------|-------|------|----------|-----|----|----------|------------|
| MS3_05222 | 0.0079 | 0.073 | 0.69 | 0.58 | 0.8  | 8.43  | 7.58 | 2.339647 | 65  | 8  | 57.52212 | 33.3333333 |
| MS3_05496 | 0.0079 | 0.073 | 0.68 | 0.57 | 0.79 | 7.05  | 7.62 | 0.565525 | 9   | 6  | 7.964602 | 25         |
| MS3_03429 | 0.008  | 0.073 | 0.66 | 0.55 | 0.77 | 8.21  | 7.66 | 1.733253 | 53  | 5  | 46.90265 | 20.8333333 |
| MS3_07650 | 0.008  | 0.073 | 0.68 | 0.56 | 0.8  | 8.71  | 7.88 | 2.293319 | 76  | 9  | 67.25664 | 37.5       |
| MS3_06868 | 0.0085 | 0.077 | 0.69 | 0.55 | 0.82 | 8.98  | 8.21 | 2.159766 | 82  | 11 | 72.56637 | 45.8333333 |
| MS3_08455 | 0.0086 | 0.077 | 0.6  | 0.49 | 0.72 | 8.06  | 7.48 | 1.786039 | 34  | 5  | 30.0885  | 20.8333333 |
| MS3_01938 | 0.0089 | 0.079 | 0.69 | 0.57 | 0.8  | 8.94  | 8.45 | 1.632316 | 86  | 13 | 76.10619 | 54.1666667 |
| MS3_04083 | 0.0097 | 0.085 | 0.66 | 0.56 | 0.77 | 10.93 | 10.5 | 1.537258 | 112 | 24 | 99.11504 | 100        |
| MS3_04193 | 0.0099 | 0.085 | 0.69 | 0.58 | 0.79 | 8.29  | 7.79 | 1.648721 | 61  | 5  | 53.9823  | 20.8333333 |
| MS3_04437 | 0.0099 | 0.085 | 0.68 | 0.56 | 0.8  | 7.86  | 7.45 | 1.506818 | 26  | 2  | 23.00885 | 8.33333333 |
| MS3_08618 | 0.0099 | 0.085 | 0.68 | 0.55 | 0.8  | 7.83  | 8.25 | 0.657047 | 24  | 11 | 21.23894 | 45.8333333 |
| MS3_00498 | 0.01   | 0.085 | 0.68 | 0.57 | 0.79 | 8.86  | 8.17 | 1.993716 | 81  | 11 | 71.68142 | 45.8333333 |
| MS3_01141 | 0.01   | 0.085 | 0.67 | 0.54 | 0.8  | 7.06  | 7.87 | 0.444858 | 13  | 11 | 11.50442 | 45.8333333 |
| MS3_02162 | 0.01   | 0.085 | 0.67 | 0.55 | 0.78 | 8.05  | 7.53 | 1.682028 | 43  | 5  | 38.0531  | 20.8333333 |
| MS3_05283 | 0.01   | 0.085 | 0.66 | 0.55 | 0.78 | 7.18  | 7.74 | 0.571209 | 13  | 6  | 11.50442 | 25         |
| MS3_08954 | 0.01   | 0.085 | 0.66 | 0.53 | 0.78 | 7.11  | 6.46 | 1.915544 | 18  | 2  | 15.9292  | 8.33333333 |
| MS3_00808 | 0.011  | 0.086 | 0.68 | 0.58 | 0.79 | 8.75  | 8.28 | 1.599994 | 78  | 10 | 69.02655 | 41.6666667 |
| MS3_04262 | 0.011  | 0.086 | 0.67 | 0.56 | 0.78 | 8.28  | 7.72 | 1.750673 | 59  | 4  | 52.21239 | 16.6666667 |
| MS3_08840 | 0.011  | 0.086 | 0.67 | 0.56 | 0.78 | 8.15  | 7.71 | 1.552707 | 51  | 5  | 45.13274 | 20.8333333 |
| MS3_08975 | 0.011  | 0.086 | 0.58 | 0.48 | 0.68 | 7.83  | 7.28 | 1.733254 | 35  | 1  | 30.97345 | 4.16666667 |
| MS3_09000 | 0.011  | 0.086 | 0.65 | 0.53 | 0.76 | 8.48  | 7.95 | 1.698932 | 54  | 10 | 47.78761 | 41.6666667 |
| MS3_09287 | 0.011  | 0.086 | 0.66 | 0.55 | 0.77 | 8.03  | 7.47 | 1.750673 | 44  | 3  | 38.93805 | 12.5       |
| MS3_10729 | 0.011  | 0.086 | 0.66 | 0.54 | 0.78 | 7.71  | 8.16 | 0.637628 | 19  | 9  | 16.81416 | 37.5       |
| MS3_09396 | 0.012  | 0.089 | 0.66 | 0.55 | 0.76 | 7.87  | 7.38 | 1.632317 | 36  | 3  | 31.85841 | 12.5       |
| MS3_09632 | 0.012  | 0.089 | 0.61 | 0.51 | 0.72 | 7.05  | 6.64 | 1.506819 | 11  | 1  | 9.734513 | 4.16666667 |
| MS3_09692 | 0.012  | 0.092 | 0.69 | 0.55 | 0.82 | 6.44  | 7.08 | 0.527291 | 3   | 2  | 2.654867 | 8.33333333 |
| MS3_00812 | 0.013  | 0.094 | 0.68 | 0.56 | 0.79 | 8.39  | 7.77 | 1.858928 | 63  | 6  | 55.75221 | 25         |
| MS3_02442 | 0.013  | 0.095 | 0.66 | 0.54 | 0.79 | 8.33  | 7.6  | 2.075081 | 56  | 9  | 49.55752 | 37.5       |
| MS3_04117 | 0.013  | 0.098 | 0.67 | 0.53 | 0.81 | 6.3   | 7.16 | 0.423161 | 6   | 6  | 5.309735 | 25         |
| MS3_05322 | 0.013  | 0.096 | 0.67 | 0.55 | 0.8  | 7.91  | 7.46 | 1.568312 | 22  | 3  | 19.46903 | 12.5       |
| MS3_01840 | 0.014  | 0.1   | 0.67 | 0.55 | 0.78 | 8.87  | 8.25 | 1.858928 | 81  | 13 | 71.68142 | 54.1666667 |
| MS3_02758 | 0.014  | 0.1   | 0.67 | 0.55 | 0.79 | 7.79  | 8.27 | 0.618783 | 26  | 11 | 23.00885 | 45.8333333 |
| MS3_05734 | 0.014  | 0.1   | 0.66 | 0.55 | 0.77 | 7.25  | 7.69 | 0.644036 | 16  | 4  | 14.15929 | 16.6666667 |
| MS3_00257 | 0.015  | 0.1   | 0.66 | 0.54 | 0.77 | 7.68  | 7.2  | 1.616075 | 24  | 2  | 21.23894 | 8.33333333 |
| MS3_01483 | 0.015  | 0.1   | 0.64 | 0.53 | 0.76 | 7.72  | 8.13 | 0.66365  | 31  | 9  | 27.43363 | 37.5       |
| MS3_04962 | 0.015  | 0.1   | 0.63 | 0.52 | 0.74 | 7.86  | 8.23 | 0.690734 | 27  | 10 | 23.89381 | 41.6666667 |
| MS3_03372 | 0.016  | 0.11  | 0.66 | 0.54 | 0.78 | 8.07  | 7.42 | 1.915541 | 51  | 5  | 45.13274 | 20.8333333 |

|           |       |      |      |      |      |      |      |          |    |    |          |            |
|-----------|-------|------|------|------|------|------|------|----------|----|----|----------|------------|
| MS3_09846 | 0.016 | 0.11 | 0.68 | 0.55 | 0.81 | 7.62 | 6.72 | 2.459606 | 38 | 4  | 33.62832 | 16.6666667 |
| MS3_11293 | 0.016 | 0.11 | 0.67 | 0.55 | 0.8  | 8.14 | 7.37 | 2.159767 | 53 | 7  | 46.90265 | 29.1666667 |
| MS3_00859 | 0.017 | 0.11 | 0.66 | 0.53 | 0.78 | 6.04 | 6.5  | 0.631281 | 0  | 0  | 0        | 0          |
| MS3_01339 | 0.017 | 0.11 | 0.66 | 0.55 | 0.76 | 8.18 | 7.68 | 1.648721 | 54 | 4  | 47.78761 | 16.6666667 |
| MS3_04800 | 0.017 | 0.11 | 0.68 | 0.56 | 0.8  | 7.98 | 7.34 | 1.896481 | 42 | 3  | 37.16814 | 12.5       |
| MS3_07422 | 0.017 | 0.11 | 0.65 | 0.53 | 0.77 | 7.57 | 7.96 | 0.677057 | 14 | 6  | 12.38938 | 25         |
| MS3_09089 | 0.017 | 0.11 | 0.67 | 0.54 | 0.79 | 6.5  | 6.95 | 0.637627 | 3  | 0  | 2.654867 | 0          |
| MS3_00756 | 0.018 | 0.12 | 0.65 | 0.53 | 0.77 | 8.32 | 7.61 | 2.033992 | 64 | 9  | 56.63717 | 37.5       |
| MS3_05280 | 0.018 | 0.12 | 0.65 | 0.53 | 0.76 | 8.39 | 7.98 | 1.506818 | 61 | 8  | 53.9823  | 33.3333333 |
| MS3_06147 | 0.018 | 0.12 | 0.67 | 0.56 | 0.78 | 7.04 | 7.41 | 0.690734 | 6  | 2  | 5.309735 | 8.33333333 |
| MS3_10440 | 0.018 | 0.12 | 0.66 | 0.54 | 0.78 | 7.45 | 8.02 | 0.565525 | 24 | 8  | 21.23894 | 33.3333333 |
| MS3_10772 | 0.018 | 0.12 | 0.67 | 0.55 | 0.79 | 6.94 | 7.47 | 0.588605 | 9  | 3  | 7.964602 | 12.5       |
| MS3_00151 | 0.019 | 0.12 | 0.64 | 0.52 | 0.75 | 7.17 | 7.64 | 0.625002 | 6  | 3  | 5.309735 | 12.5       |
| MS3_01542 | 0.019 | 0.12 | 0.65 | 0.52 | 0.78 | 9.15 | 8.46 | 1.993716 | 86 | 13 | 76.10619 | 54.1666667 |
| MS3_02593 | 0.019 | 0.12 | 0.66 | 0.53 | 0.79 | 7.34 | 7.83 | 0.612626 | 10 | 6  | 8.849558 | 25         |
| MS3_03872 | 0.019 | 0.12 | 0.66 | 0.55 | 0.77 | 8.12 | 7.45 | 1.954238 | 56 | 6  | 49.55752 | 25         |
| MS3_05284 | 0.019 | 0.12 | 0.66 | 0.54 | 0.78 | 7.48 | 7.93 | 0.637628 | 17 | 8  | 15.04425 | 33.3333333 |
| MS3_08144 | 0.019 | 0.12 | 0.66 | 0.54 | 0.78 | 6.8  | 7.27 | 0.625002 | 3  | 2  | 2.654867 | 8.33333333 |
| MS3_09233 | 0.019 | 0.12 | 0.65 | 0.54 | 0.75 | 7.88 | 7.43 | 1.568313 | 36 | 2  | 31.85841 | 8.33333333 |
| MS3_05677 | 0.02  | 0.12 | 0.65 | 0.51 | 0.79 | 8.63 | 7.85 | 2.181473 | 64 | 10 | 56.63717 | 41.6666667 |
| MS3_00934 | 0.021 | 0.12 | 0.66 | 0.54 | 0.79 | 6.27 | 6.8  | 0.588604 | 1  | 2  | 0.884956 | 8.33333333 |
| MS3_00006 | 0.021 | 0.12 | 0.66 | 0.53 | 0.78 | 7.31 | 7.82 | 0.600495 | 11 | 7  | 9.734513 | 29.1666667 |
| MS3_04053 | 0.021 | 0.12 | 0.65 | 0.53 | 0.76 | 8    | 8.43 | 0.650509 | 38 | 14 | 33.62832 | 58.3333333 |
| MS3_09684 | 0.021 | 0.12 | 0.56 | 0.44 | 0.68 | 7.9  | 7.38 | 1.682028 | 31 | 2  | 27.43363 | 8.33333333 |
| MS3_09829 | 0.021 | 0.12 | 0.66 | 0.54 | 0.78 | 6.21 | 6.68 | 0.625001 | 2  | 1  | 1.769912 | 4.16666667 |
| MS3_01871 | 0.022 | 0.13 | 0.65 | 0.52 | 0.78 | 7.58 | 8.03 | 0.637628 | 17 | 9  | 15.04425 | 37.5       |
| MS3_01937 | 0.022 | 0.13 | 0.65 | 0.52 | 0.77 | 7.82 | 7.37 | 1.568313 | 29 | 4  | 25.66372 | 16.6666667 |
| MS3_03569 | 0.022 | 0.13 | 0.65 | 0.53 | 0.77 | 7.84 | 8.27 | 0.650509 | 30 | 12 | 26.54867 | 50         |
| MS3_05050 | 0.022 | 0.13 | 0.64 | 0.52 | 0.75 | 7.05 | 6.53 | 1.68203  | 11 | 1  | 9.734513 | 4.16666667 |
| MS3_07918 | 0.022 | 0.13 | 0.66 | 0.53 | 0.79 | 8.5  | 7.81 | 1.993716 | 65 | 9  | 57.52212 | 37.5       |
| MS3_09489 | 0.023 | 0.13 | 0.65 | 0.53 | 0.76 | 7.65 | 7.06 | 1.803989 | 34 | 5  | 30.0885  | 20.8333333 |
| MS3_09942 | 0.023 | 0.13 | 0.65 | 0.51 | 0.79 | 8.38 | 7.64 | 2.095936 | 59 | 10 | 52.21239 | 41.6666667 |
| MS3_00779 | 0.024 | 0.13 | 0.66 | 0.54 | 0.78 | 8.26 | 7.82 | 1.552707 | 61 | 6  | 53.9823  | 25         |
| MS3_06877 | 0.024 | 0.13 | 0.65 | 0.53 | 0.76 | 8.34 | 7.72 | 1.858928 | 62 | 8  | 54.86726 | 33.3333333 |
| MS3_10459 | 0.024 | 0.13 | 0.62 | 0.48 | 0.75 | 7.91 | 7.33 | 1.786039 | 28 | 4  | 24.77876 | 16.6666667 |
| MS3_11526 | 0.024 | 0.13 | 0.66 | 0.53 | 0.78 | 7.81 | 7.09 | 2.054434 | 46 | 4  | 40.70796 | 16.6666667 |
| MS3_00880 | 0.025 | 0.14 | 0.65 | 0.53 | 0.77 | 7.03 | 6.48 | 1.733256 | 10 | 1  | 8.849558 | 4.16666667 |



|           |       |      |      |      |      |      |      |          |    |    |          |             |
|-----------|-------|------|------|------|------|------|------|----------|----|----|----------|-------------|
| MS3_08162 | 0.025 | 0.14 | 0.65 | 0.53 | 0.77 | 7.43 | 6.79 | 1.896483 | 28 | 2  | 24.77876 | 8.33333333  |
| MS3_00844 | 0.026 | 0.14 | 0.71 | 0.59 | 0.83 | 7.24 | 7.74 | 0.60653  | 8  | 5  | 7.079646 | 20.83333333 |
| MS3_03576 | 0.026 | 0.14 | 0.66 | 0.53 | 0.78 | 7.61 | 8.12 | 0.600495 | 22 | 9  | 19.46903 | 37.5        |
| MS3_04025 | 0.026 | 0.14 | 0.65 | 0.53 | 0.77 | 7.7  | 8.03 | 0.718924 | 21 | 7  | 18.58407 | 29.16666667 |
| MS3_06283 | 0.027 | 0.14 | 0.65 | 0.53 | 0.77 | 7.84 | 8.25 | 0.66365  | 30 | 11 | 26.54867 | 45.83333333 |
| MS3_00569 | 0.028 | 0.15 | 0.65 | 0.53 | 0.77 | 7.59 | 8.09 | 0.606531 | 25 | 10 | 22.12389 | 41.66666667 |
| MS3_03818 | 0.028 | 0.15 | 0.66 | 0.55 | 0.77 | 6.28 | 6.68 | 0.670319 | 1  | 1  | 0.884956 | 4.16666667  |
| MS3_04598 | 0.028 | 0.15 | 0.66 | 0.53 | 0.8  | 7.56 | 8.13 | 0.565525 | 20 | 12 | 17.69912 | 50          |
| MS3_09283 | 0.028 | 0.15 | 0.67 | 0.55 | 0.79 | 7.54 | 8.17 | 0.532592 | 15 | 8  | 13.27434 | 33.33333333 |
| MS3_08636 | 0.029 | 0.15 | 0.63 | 0.51 | 0.75 | 7.44 | 7.06 | 1.462285 | 15 | 0  | 13.27434 | 0           |
| MS3_10900 | 0.029 | 0.15 | 0.65 | 0.52 | 0.79 | 6.66 | 7.05 | 0.677056 | 0  | 1  | 0        | 4.16666667  |
| MS3_09276 | 0.03  | 0.15 | 0.64 | 0.53 | 0.76 | 8.11 | 7.68 | 1.537258 | 47 | 5  | 41.59292 | 20.83333333 |
| MS3_00499 | 0.03  | 0.16 | 0.66 | 0.52 | 0.8  | 8.14 | 7.47 | 1.954238 | 49 | 7  | 43.36283 | 29.16666667 |
| MS3_03571 | 0.03  | 0.15 | 0.64 | 0.51 | 0.76 | 6.98 | 7.39 | 0.66365  | 5  | 2  | 4.424779 | 8.33333333  |
| MS3_01705 | 0.031 | 0.16 | 0.66 | 0.52 | 0.8  | 6.11 | 6.58 | 0.625    | 1  | 1  | 0.884956 | 4.16666667  |
| MS3_06223 | 0.031 | 0.16 | 0.65 | 0.52 | 0.78 | 6.36 | 6.77 | 0.663649 | 1  | 0  | 0.884956 | 0           |
| MS3_06276 | 0.031 | 0.16 | 0.66 | 0.54 | 0.79 | 8.51 | 8.08 | 1.537258 | 66 | 6  | 58.40708 | 25          |
| MS3_09903 | 0.031 | 0.16 | 0.65 | 0.53 | 0.77 | 7.43 | 6.83 | 1.82212  | 24 | 2  | 21.23894 | 8.33333333  |
| MS3_02202 | 0.032 | 0.16 | 0.63 | 0.51 | 0.76 | 8.28 | 7.87 | 1.506818 | 51 | 7  | 45.13274 | 29.16666667 |
| MS3_05516 | 0.032 | 0.16 | 0.64 | 0.52 | 0.75 | 7.17 | 6.54 | 1.877613 | 19 | 2  | 16.81416 | 8.33333333  |
| MS3_08024 | 0.032 | 0.16 | 0.64 | 0.52 | 0.76 | 7.33 | 7.74 | 0.66365  | 15 | 6  | 13.27434 | 25          |
| MS3_09626 | 0.032 | 0.16 | 0.64 | 0.52 | 0.76 | 7.81 | 8.21 | 0.67032  | 28 | 12 | 24.77876 | 50          |
| MS3_10956 | 0.032 | 0.16 | 0.65 | 0.53 | 0.77 | 7.96 | 7.36 | 1.822119 | 45 | 4  | 39.82301 | 16.66666667 |
| MS3_06380 | 0.033 | 0.16 | 0.66 | 0.55 | 0.77 | 7.7  | 8.13 | 0.650509 | 23 | 8  | 20.35398 | 33.33333333 |
| MS3_06488 | 0.033 | 0.16 | 0.66 | 0.52 | 0.79 | 8.08 | 7.45 | 1.877611 | 45 | 5  | 39.82301 | 20.83333333 |
| MS3_07337 | 0.033 | 0.16 | 0.64 | 0.53 | 0.76 | 6.51 | 6.97 | 0.631283 | 4  | 3  | 3.539823 | 12.5        |
| MS3_08613 | 0.033 | 0.16 | 0.64 | 0.51 | 0.77 | 8.07 | 8.53 | 0.631284 | 43 | 14 | 38.0531  | 58.33333333 |
| MS3_11103 | 0.033 | 0.16 | 0.66 | 0.53 | 0.79 | 7.49 | 6.82 | 1.954239 | 25 | 3  | 22.12389 | 12.5        |
| MS3_00663 | 0.034 | 0.16 | 0.65 | 0.52 | 0.78 | 7.16 | 7.56 | 0.67032  | 8  | 2  | 7.079646 | 8.33333333  |
| MS3_07994 | 0.034 | 0.16 | 0.64 | 0.49 | 0.78 | 7.95 | 7.24 | 2.033992 | 40 | 8  | 35.39823 | 33.33333333 |
| MS3_08004 | 0.034 | 0.16 | 0.65 | 0.53 | 0.77 | 7.87 | 7.38 | 1.632317 | 39 | 4  | 34.51327 | 16.66666667 |
| MS3_11280 | 0.034 | 0.16 | 0.64 | 0.52 | 0.77 | 7.11 | 7.45 | 0.71177  | 7  | 2  | 6.19469  | 8.33333333  |
| MS3_06914 | 0.035 | 0.16 | 0.65 | 0.53 | 0.76 | 6.46 | 6.9  | 0.644035 | 3  | 2  | 2.654867 | 8.33333333  |
| MS3_07273 | 0.035 | 0.16 | 0.67 | 0.53 | 0.81 | 7.58 | 8.11 | 0.588605 | 18 | 11 | 15.9292  | 45.83333333 |
| MS3_00223 | 0.037 | 0.17 | 0.64 | 0.51 | 0.76 | 7.79 | 7.3  | 1.632317 | 30 | 5  | 26.54867 | 20.83333333 |
| MS3_03863 | 0.037 | 0.17 | 0.66 | 0.52 | 0.79 | 7.19 | 7.59 | 0.67032  | 5  | 4  | 4.424779 | 16.66666667 |
| MS3_09993 | 0.037 | 0.17 | 0.67 | 0.54 | 0.79 | 7.71 | 8.19 | 0.618783 | 24 | 10 | 21.23894 | 41.66666667 |

|           |       |      |      |      |      |      |      |          |     |    |          |            |
|-----------|-------|------|------|------|------|------|------|----------|-----|----|----------|------------|
| MS3_05910 | 0.038 | 0.17 | 0.65 | 0.55 | 0.76 | 7.41 | 7.81 | 0.67032  | 18  | 7  | 15.9292  | 29.1666667 |
| MS3_10044 | 0.038 | 0.17 | 0.65 | 0.54 | 0.75 | 6.31 | 6.61 | 0.740817 | 3   | 0  | 2.654867 | 0          |
| MS3_11076 | 0.038 | 0.17 | 0.63 | 0.51 | 0.75 | 8.48 | 8.02 | 1.584074 | 66  | 9  | 58.40708 | 37.5       |
| MS3_10671 | 0.039 | 0.18 | 0.64 | 0.5  | 0.77 | 7.35 | 6.79 | 1.750674 | 23  | 3  | 20.35398 | 12.5       |
| MS3_01761 | 0.04  | 0.18 | 0.63 | 0.52 | 0.75 | 8.01 | 7.67 | 1.404948 | 41  | 5  | 36.28319 | 20.8333333 |
| MS3_05389 | 0.04  | 0.18 | 0.61 | 0.47 | 0.76 | 6.78 | 7.26 | 0.618783 | 4   | 6  | 3.539823 | 25         |
| MS3_07403 | 0.04  | 0.18 | 0.66 | 0.55 | 0.77 | 6.37 | 6.73 | 0.697675 | 3   | 0  | 2.654867 | 0          |
| MS3_05495 | 0.041 | 0.18 | 0.63 | 0.51 | 0.75 | 7.98 | 8.35 | 0.690734 | 32  | 11 | 28.31858 | 45.8333333 |
| MS3_02928 | 0.042 | 0.18 | 0.63 | 0.51 | 0.76 | 8.18 | 8.51 | 0.718924 | 45  | 14 | 39.82301 | 58.3333333 |
| MS3_06211 | 0.042 | 0.18 | 0.65 | 0.51 | 0.79 | 7.52 | 6.93 | 1.80399  | 16  | 4  | 14.15929 | 16.6666667 |
| MS3_06719 | 0.042 | 0.18 | 0.65 | 0.53 | 0.78 | 7.57 | 8.05 | 0.618783 | 23  | 8  | 20.35398 | 33.3333333 |
| MS3_00891 | 0.043 | 0.19 | 0.63 | 0.52 | 0.75 | 6.78 | 7.14 | 0.697676 | 2   | 2  | 1.769912 | 8.3333333  |
| MS3_02356 | 0.044 | 0.19 | 0.61 | 0.49 | 0.74 | 8.37 | 7.97 | 1.491825 | 54  | 8  | 47.78761 | 33.3333333 |
| MS3_05939 | 0.044 | 0.19 | 0.65 | 0.52 | 0.78 | 7.53 | 7.93 | 0.67032  | 13  | 7  | 11.50442 | 29.1666667 |
| MS3_06101 | 0.044 | 0.19 | 0.65 | 0.51 | 0.78 | 7.99 | 7.58 | 1.506818 | 40  | 5  | 35.39823 | 20.8333333 |
| MS3_06500 | 0.044 | 0.19 | 0.64 | 0.53 | 0.76 | 7.39 | 7.78 | 0.677057 | 16  | 5  | 14.15929 | 20.8333333 |
| MS3_09333 | 0.044 | 0.19 | 0.63 | 0.52 | 0.75 | 7.77 | 7.42 | 1.419068 | 24  | 1  | 21.23894 | 4.16666667 |
| MS3_00787 | 0.045 | 0.19 | 0.62 | 0.5  | 0.74 | 9.61 | 9.92 | 0.733447 | 105 | 24 | 92.92035 | 100        |
| MS3_03269 | 0.046 | 0.19 | 0.63 | 0.52 | 0.74 | 7.72 | 7.23 | 1.632317 | 42  | 2  | 37.16814 | 8.3333333  |
| MS3_06431 | 0.046 | 0.19 | 0.63 | 0.5  | 0.75 | 7.58 | 7.92 | 0.71177  | 12  | 5  | 10.61947 | 20.8333333 |
| MS3_07411 | 0.046 | 0.19 | 0.64 | 0.51 | 0.77 | 6.66 | 7.12 | 0.631283 | 3   | 3  | 2.654867 | 12.5       |
| MS3_08907 | 0.046 | 0.19 | 0.62 | 0.5  | 0.75 | 7.23 | 6.79 | 1.552708 | 15  | 1  | 13.27434 | 4.16666667 |
| MS3_02637 | 0.047 | 0.2  | 0.65 | 0.51 | 0.78 | 7.61 | 7.03 | 1.786039 | 27  | 5  | 23.89381 | 20.8333333 |
| MS3_05047 | 0.048 | 0.2  | 0.63 | 0.51 | 0.75 | 7.18 | 6.67 | 1.665293 | 21  | 1  | 18.58407 | 4.16666667 |
| MS3_00702 | 0.049 | 0.2  | 0.64 | 0.5  | 0.77 | 7.76 | 7.33 | 1.537258 | 27  | 3  | 23.89381 | 12.5       |
| MS3_06680 | 0.049 | 0.2  | 0.65 | 0.53 | 0.77 | 6.07 | 6.57 | 0.606529 | 2   | 1  | 1.769912 | 4.16666667 |
| MS3_06707 | 0.049 | 0.2  | 0.62 | 0.49 | 0.75 | 7.56 | 7.98 | 0.657047 | 23  | 8  | 20.35398 | 33.3333333 |
| MS3_07885 | 0.049 | 0.2  | 0.63 | 0.51 | 0.75 | 7.52 | 7.82 | 0.740818 | 14  | 5  | 12.38938 | 20.8333333 |
| MS3_11411 | 0.05  | 0.2  | 0.66 | 0.53 | 0.78 | 8.33 | 7.49 | 2.316368 | 51  | 7  | 45.13274 | 29.1666667 |
| MS3_03963 | 0.051 | 0.2  | 0.65 | 0.52 | 0.78 | 6.67 | 7.08 | 0.66365  | 2   | 3  | 1.769912 | 12.5       |
| MS3_04493 | 0.051 | 0.2  | 0.63 | 0.49 | 0.76 | 7.31 | 7.69 | 0.683861 | 10  | 7  | 8.849558 | 29.1666667 |
| MS3_08533 | 0.051 | 0.2  | 0.64 | 0.52 | 0.76 | 7.4  | 7.72 | 0.726149 | 12  | 7  | 10.61947 | 29.1666667 |
| MS3_04896 | 0.053 | 0.21 | 0.64 | 0.51 | 0.77 | 8.17 | 7.78 | 1.476981 | 47  | 6  | 41.59292 | 25         |
| MS3_10305 | 0.053 | 0.21 | 0.62 | 0.51 | 0.74 | 8.1  | 7.78 | 1.377128 | 46  | 6  | 40.70796 | 25         |
| MS3_05125 | 0.054 | 0.21 | 0.45 | 0.32 | 0.57 | 7.18 | 6.72 | 1.584075 | 18  | 0  | 15.9292  | 0          |
| MS3_09443 | 0.054 | 0.21 | 0.64 | 0.52 | 0.76 | 7.48 | 7.81 | 0.718924 | 16  | 4  | 14.15929 | 16.6666667 |
| MS3_04221 | 0.055 | 0.21 | 0.61 | 0.48 | 0.74 | 7.7  | 8.07 | 0.690734 | 26  | 8  | 23.00885 | 33.3333333 |

|           |       |      |      |      |      |      |      |          |    |    |          |            |
|-----------|-------|------|------|------|------|------|------|----------|----|----|----------|------------|
| MS3_05484 | 0.055 | 0.21 | 0.65 | 0.52 | 0.78 | 6.88 | 7.26 | 0.683861 | 2  | 3  | 1.769912 | 12.5       |
| MS3_10292 | 0.055 | 0.21 | 0.61 | 0.49 | 0.73 | 7.75 | 8.06 | 0.733447 | 27 | 7  | 23.89381 | 29.1666667 |
| MS3_02176 | 0.056 | 0.21 | 0.63 | 0.51 | 0.75 | 8.31 | 7.99 | 1.377128 | 57 | 7  | 50.44248 | 29.1666667 |
| MS3_06690 | 0.056 | 0.21 | 0.61 | 0.48 | 0.75 | 9.42 | 8.87 | 1.733253 | 98 | 15 | 86.72566 | 62.5       |
| MS3_09952 | 0.056 | 0.21 | 0.63 | 0.52 | 0.75 | 7.48 | 7.85 | 0.690734 | 15 | 5  | 13.27434 | 20.8333333 |
| MS3_05602 | 0.057 | 0.22 | 0.6  | 0.49 | 0.72 | 7.54 | 7.21 | 1.390968 | 19 | 2  | 16.81416 | 8.3333333  |
| MS3_08903 | 0.057 | 0.22 | 0.64 | 0.52 | 0.76 | 6.6  | 7.02 | 0.657046 | 6  | 1  | 5.309735 | 4.1666667  |
| MS3_03091 | 0.06  | 0.23 | 0.64 | 0.52 | 0.77 | 7.47 | 7.86 | 0.677057 | 17 | 7  | 15.04425 | 29.1666667 |
| MS3_02157 | 0.061 | 0.23 | 0.58 | 0.47 | 0.69 | 7.87 | 8.17 | 0.740818 | 35 | 6  | 30.97345 | 25         |
| MS3_02807 | 0.061 | 0.23 | 0.62 | 0.51 | 0.74 | 7.58 | 7.05 | 1.698933 | 36 | 4  | 31.85841 | 16.6666667 |
| MS3_06748 | 0.061 | 0.23 | 0.63 | 0.51 | 0.75 | 7.48 | 6.98 | 1.648722 | 32 | 2  | 28.31858 | 8.3333333  |
| MS3_08216 | 0.061 | 0.23 | 0.62 | 0.5  | 0.74 | 6.86 | 7.22 | 0.697676 | 3  | 5  | 2.654867 | 20.8333333 |
| MS3_10931 | 0.061 | 0.23 | 0.65 | 0.5  | 0.79 | 7.25 | 7.66 | 0.66365  | 5  | 6  | 4.424779 | 25         |
| MS3_05908 | 0.062 | 0.23 | 0.63 | 0.5  | 0.76 | 7.86 | 7.47 | 1.476981 | 29 | 4  | 25.66372 | 16.6666667 |
| MS3_09961 | 0.062 | 0.23 | 0.62 | 0.49 | 0.74 | 8.43 | 7.9  | 1.698932 | 68 | 9  | 60.17699 | 37.5       |
| MS3_05600 | 0.063 | 0.23 | 0.63 | 0.5  | 0.76 | 6.41 | 6.88 | 0.625001 | 3  | 1  | 2.654867 | 4.1666667  |
| MS3_08169 | 0.063 | 0.23 | 0.61 | 0.49 | 0.73 | 7.11 | 6.65 | 1.584076 | 16 | 1  | 14.15929 | 4.1666667  |
| MS3_07737 | 0.065 | 0.24 | 0.64 | 0.52 | 0.76 | 9    | 8.6  | 1.491825 | 86 | 13 | 76.10619 | 54.1666667 |
| MS3_01777 | 0.065 | 0.24 | 0.63 | 0.52 | 0.74 | 7.93 | 7.61 | 1.377128 | 41 | 4  | 36.28319 | 16.6666667 |
| MS3_07854 | 0.065 | 0.24 | 0.62 | 0.49 | 0.75 | 7.17 | 7.54 | 0.690734 | 9  | 4  | 7.964602 | 16.6666667 |
| MS3_10486 | 0.065 | 0.24 | 0.63 | 0.5  | 0.76 | 8.55 | 8.04 | 1.665291 | 74 | 8  | 65.48673 | 33.3333333 |
| MS3_01348 | 0.066 | 0.24 | 0.6  | 0.48 | 0.71 | 7.42 | 7.67 | 0.778801 | 7  | 3  | 6.19469  | 12.5       |
| MS3_00383 | 0.067 | 0.24 | 0.62 | 0.5  | 0.74 | 7.85 | 7.37 | 1.616075 | 37 | 5  | 32.74336 | 20.8333333 |
| MS3_05631 | 0.067 | 0.24 | 0.62 | 0.5  | 0.73 | 8.15 | 7.55 | 1.822119 | 54 | 6  | 47.78761 | 25         |
| MS3_06462 | 0.067 | 0.24 | 0.62 | 0.49 | 0.75 | 8.79 | 8.18 | 1.840432 | 76 | 12 | 67.25664 | 50         |
| MS3_02172 | 0.068 | 0.24 | 0.6  | 0.48 | 0.73 | 9.23 | 8.72 | 1.665291 | 93 | 14 | 82.30088 | 58.3333333 |
| MS3_02375 | 0.068 | 0.24 | 0.61 | 0.49 | 0.73 | 8.36 | 7.99 | 1.447735 | 59 | 12 | 52.21239 | 50         |
| MS3_02393 | 0.068 | 0.24 | 0.64 | 0.51 | 0.77 | 7.19 | 7.57 | 0.683861 | 9  | 4  | 7.964602 | 16.6666667 |
| MS3_11139 | 0.069 | 0.24 | 0.65 | 0.53 | 0.77 | 8.02 | 7.54 | 1.616075 | 53 | 4  | 46.90265 | 16.6666667 |
| MS3_00800 | 0.071 | 0.25 | 0.62 | 0.49 | 0.75 | 7.1  | 7.58 | 0.618783 | 14 | 8  | 12.38938 | 33.3333333 |
| MS3_03726 | 0.071 | 0.25 | 0.63 | 0.49 | 0.76 | 7.76 | 8.12 | 0.697676 | 25 | 9  | 22.12389 | 37.5       |
| MS3_08042 | 0.072 | 0.25 | 0.6  | 0.48 | 0.73 | 7.83 | 8.17 | 0.71177  | 33 | 10 | 29.20354 | 41.6666667 |
| MS3_03304 | 0.074 | 0.25 | 0.61 | 0.49 | 0.72 | 8.06 | 7.75 | 1.363425 | 41 | 7  | 36.28319 | 29.1666667 |
| MS3_02991 | 0.075 | 0.26 | 0.63 | 0.51 | 0.75 | 8.3  | 7.88 | 1.521962 | 60 | 8  | 53.09735 | 33.3333333 |
| MS3_07125 | 0.075 | 0.26 | 0.61 | 0.48 | 0.73 | 7.52 | 7.89 | 0.690734 | 22 | 7  | 19.46903 | 29.1666667 |
| MS3_10194 | 0.075 | 0.26 | 0.56 | 0.45 | 0.67 | 7.82 | 7.41 | 1.506818 | 34 | 5  | 30.0885  | 20.8333333 |
| MS3_05960 | 0.076 | 0.26 | 0.63 | 0.51 | 0.75 | 8.01 | 7.41 | 1.822119 | 39 | 4  | 34.51327 | 16.6666667 |

|           |       |      |      |      |      |      |      |          |    |    |          |            |
|-----------|-------|------|------|------|------|------|------|----------|----|----|----------|------------|
| MS3_09161 | 0.076 | 0.26 | 0.58 | 0.47 | 0.7  | 8.42 | 8.14 | 1.32313  | 52 | 9  | 46.0177  | 37.5       |
| MS3_00939 | 0.077 | 0.26 | 0.62 | 0.5  | 0.74 | 6.78 | 7.08 | 0.740818 | 3  | 1  | 2.654867 | 4.16666667 |
| MS3_02499 | 0.077 | 0.26 | 0.62 | 0.48 | 0.76 | 7.57 | 7.19 | 1.462285 | 15 | 1  | 13.27434 | 4.16666667 |
| MS3_07824 | 0.078 | 0.26 | 0.6  | 0.47 | 0.72 | 8.65 | 8.33 | 1.377128 | 71 | 13 | 62.83186 | 54.1666667 |
| MS3_09190 | 0.078 | 0.26 | 0.61 | 0.49 | 0.74 | 7.64 | 7.3  | 1.404948 | 23 | 2  | 20.35398 | 8.33333333 |
| MS3_06918 | 0.079 | 0.26 | 0.62 | 0.5  | 0.75 | 7.47 | 7    | 1.599995 | 27 | 3  | 23.89381 | 12.5       |
| MS3_06928 | 0.08  | 0.26 | 0.62 | 0.49 | 0.74 | 8.16 | 7.75 | 1.506818 | 46 | 6  | 40.70796 | 25         |
| MS3_07874 | 0.08  | 0.26 | 0.61 | 0.48 | 0.74 | 8.08 | 7.57 | 1.665291 | 49 | 7  | 43.36283 | 29.1666667 |
| MS3_08037 | 0.08  | 0.26 | 0.61 | 0.49 | 0.73 | 8    | 7.68 | 1.377128 | 32 | 3  | 28.31858 | 12.5       |
| MS3_08725 | 0.08  | 0.26 | 0.62 | 0.5  | 0.74 | 7.58 | 7.13 | 1.568313 | 27 | 5  | 23.89381 | 20.8333333 |
| MS3_10713 | 0.08  | 0.26 | 0.62 | 0.49 | 0.75 | 7.68 | 7.1  | 1.786039 | 36 | 4  | 31.85841 | 16.6666667 |
| MS3_02041 | 0.081 | 0.26 | 0.61 | 0.49 | 0.72 | 7.4  | 7.08 | 1.377128 | 16 | 1  | 14.15929 | 4.16666667 |
| MS3_02346 | 0.081 | 0.26 | 0.64 | 0.53 | 0.75 | 6.73 | 7.04 | 0.733446 | 3  | 0  | 2.654867 | 0          |
| MS3_03096 | 0.083 | 0.27 | 0.61 | 0.48 | 0.73 | 7.55 | 8.04 | 0.612626 | 35 | 11 | 30.97345 | 45.8333333 |
| MS3_04261 | 0.083 | 0.27 | 0.6  | 0.49 | 0.72 | 7.43 | 7.05 | 1.462285 | 25 | 2  | 22.12389 | 8.33333333 |
| MS3_04158 | 0.084 | 0.27 | 0.64 | 0.51 | 0.77 | 7.83 | 8.22 | 0.677057 | 33 | 14 | 29.20354 | 58.3333333 |
| MS3_09644 | 0.084 | 0.27 | 0.62 | 0.5  | 0.74 | 7.18 | 7.52 | 0.71177  | 15 | 3  | 13.27434 | 12.5       |
| MS3_06257 | 0.085 | 0.27 | 0.64 | 0.5  | 0.79 | 7.26 | 6.76 | 1.648723 | 15 | 4  | 13.27434 | 16.6666667 |
| MS3_01302 | 0.086 | 0.27 | 0.63 | 0.51 | 0.75 | 6.73 | 7.08 | 0.704688 | 8  | 2  | 7.079646 | 8.33333333 |
| MS3_03206 | 0.086 | 0.27 | 0.64 | 0.5  | 0.77 | 7.04 | 6.54 | 1.648723 | 12 | 2  | 10.61947 | 8.33333333 |
| MS3_05150 | 0.086 | 0.27 | 0.62 | 0.5  | 0.74 | 6.89 | 7.21 | 0.726149 | 3  | 1  | 2.654867 | 4.16666667 |
| MS3_08398 | 0.086 | 0.27 | 0.61 | 0.48 | 0.73 | 8.35 | 8.03 | 1.377128 | 56 | 8  | 49.55752 | 33.3333333 |
| MS3_08996 | 0.086 | 0.27 | 0.63 | 0.5  | 0.77 | 7.22 | 7.84 | 0.537944 | 28 | 12 | 24.77876 | 50         |
| MS3_10499 | 0.086 | 0.27 | 0.61 | 0.48 | 0.73 | 8.08 | 7.76 | 1.377128 | 42 | 5  | 37.16814 | 20.8333333 |
| MS3_05686 | 0.087 | 0.27 | 0.59 | 0.46 | 0.71 | 8.19 | 7.84 | 1.419068 | 39 | 5  | 34.51327 | 20.8333333 |
| MS3_09253 | 0.087 | 0.27 | 0.54 | 0.43 | 0.65 | 6.68 | 6.35 | 1.39097  | 13 | 0  | 11.50442 | 0          |
| MS3_09229 | 0.088 | 0.27 | 0.6  | 0.48 | 0.72 | 8.62 | 8.31 | 1.363425 | 74 | 14 | 65.48673 | 58.3333333 |
| MS3_07395 | 0.089 | 0.27 | 0.61 | 0.48 | 0.74 | 7.75 | 8.12 | 0.690734 | 33 | 10 | 29.20354 | 41.6666667 |
| MS3_08689 | 0.089 | 0.27 | 0.62 | 0.5  | 0.74 | 8.36 | 8.61 | 0.778801 | 54 | 15 | 47.78761 | 62.5       |
| MS3_08391 | 0.09  | 0.28 | 0.58 | 0.47 | 0.7  | 7.8  | 8.11 | 0.733447 | 35 | 8  | 30.97345 | 33.3333333 |
| MS3_11059 | 0.091 | 0.28 | 0.62 | 0.5  | 0.74 | 7.95 | 7.42 | 1.698933 | 51 | 6  | 45.13274 | 25         |
| MS3_04157 | 0.092 | 0.28 | 0.62 | 0.49 | 0.75 | 7.83 | 7.43 | 1.491825 | 37 | 5  | 32.74336 | 20.8333333 |
| MS3_10591 | 0.094 | 0.29 | 0.61 | 0.47 | 0.74 | 6.14 | 6.42 | 0.755782 | 0  | 0  | 0        | 0          |
| No hits   | 0.095 | 0.29 | 0.61 | 0.49 | 0.74 | 6.62 | 6.19 | 1.537261 | 4  | 1  | 3.539823 | 4.16666667 |
| MS3_00178 | 0.095 | 0.29 | 0.6  | 0.48 | 0.72 | 7.5  | 7.18 | 1.377128 | 15 | 2  | 13.27434 | 8.33333333 |
| MS3_07757 | 0.095 | 0.29 | 0.62 | 0.5  | 0.75 | 7.16 | 7.48 | 0.726149 | 9  | 2  | 7.964602 | 8.33333333 |
| MS3_01771 | 0.096 | 0.29 | 0.63 | 0.51 | 0.75 | 8.4  | 8.09 | 1.363425 | 61 | 11 | 53.9823  | 45.8333333 |

|           |       |      |      |      |      |      |      |          |    |    |          |            |
|-----------|-------|------|------|------|------|------|------|----------|----|----|----------|------------|
| MS3_10811 | 0.096 | 0.29 | 0.63 | 0.5  | 0.76 | 7.4  | 7.75 | 0.704688 | 12 | 7  | 10.61947 | 29.1666667 |
| MS3_08663 | 0.097 | 0.29 | 0.59 | 0.47 | 0.71 | 7.83 | 7.55 | 1.32313  | 22 | 3  | 19.46903 | 12.5       |
| MS3_02538 | 0.098 | 0.29 | 0.63 | 0.5  | 0.75 | 7.66 | 8.09 | 0.650509 | 28 | 9  | 24.77876 | 37.5       |
| MS3_04564 | 0.099 | 0.29 | 0.61 | 0.48 | 0.73 | 6.46 | 6.91 | 0.637627 | 3  | 2  | 2.654867 | 8.33333333 |
| No hits   | 0.1   | 0.3  | 0.6  | 0.48 | 0.71 | 6.96 | 6.53 | 1.537259 | 15 | 2  | 13.27434 | 8.33333333 |
| MS3_00508 | 0.1   | 0.3  | 0.6  | 0.47 | 0.72 | 7.9  | 7.4  | 1.648722 | 39 | 6  | 34.51327 | 25         |
| MS3_06126 | 0.1   | 0.3  | 0.61 | 0.48 | 0.74 | 8    | 8.3  | 0.740818 | 37 | 10 | 32.74336 | 41.6666667 |
| MS3_07096 | 0.1   | 0.3  | 0.6  | 0.49 | 0.71 | 7.11 | 6.73 | 1.462286 | 15 | 1  | 13.27434 | 4.16666667 |
| MS3_08625 | 0.1   | 0.3  | 0.61 | 0.49 | 0.72 | 7.02 | 6.71 | 1.363426 | 6  | 0  | 5.309735 | 0          |
| MS3_10036 | 0.1   | 0.3  | 0.62 | 0.5  | 0.75 | 7.23 | 7.61 | 0.683861 | 18 | 6  | 15.9292  | 25         |
| MS3_02486 | 0.11  | 0.32 | 0.61 | 0.48 | 0.74 | 7.03 | 7.3  | 0.763379 | 4  | 2  | 3.539823 | 8.33333333 |
| MS3_02641 | 0.11  | 0.31 | 0.59 | 0.48 | 0.71 | 7.71 | 7.49 | 1.246077 | 20 | 0  | 17.69912 | 0          |
| MS3_03461 | 0.11  | 0.32 | 0.6  | 0.47 | 0.73 | 7.41 | 7.01 | 1.491825 | 21 | 3  | 18.58407 | 12.5       |
| MS3_03534 | 0.11  | 0.31 | 0.6  | 0.47 | 0.74 | 8.37 | 8.67 | 0.740818 | 53 | 14 | 46.90265 | 58.3333333 |
| MS3_03768 | 0.11  | 0.31 | 0.5  | 0.35 | 0.64 | 6.92 | 8.15 | 0.292292 | 8  | 6  | 7.079646 | 25         |
| MS3_04540 | 0.11  | 0.32 | 0.63 | 0.51 | 0.75 | 6.41 | 6.7  | 0.748263 | 2  | 2  | 1.769912 | 8.33333333 |
| MS3_05520 | 0.11  | 0.32 | 0.63 | 0.49 | 0.77 | 7.5  | 7.81 | 0.733447 | 13 | 6  | 11.50442 | 25         |
| MS3_06112 | 0.11  | 0.32 | 0.63 | 0.48 | 0.77 | 7.6  | 7.08 | 1.682028 | 26 | 4  | 23.00885 | 16.6666667 |
| MS3_06559 | 0.11  | 0.31 | 0.6  | 0.48 | 0.73 | 7.25 | 7.56 | 0.733447 | 10 | 5  | 8.849558 | 20.8333333 |
| MS3_06994 | 0.11  | 0.31 | 0.62 | 0.48 | 0.76 | 8.31 | 7.84 | 1.599994 | 59 | 7  | 52.21239 | 29.1666667 |
| MS3_08479 | 0.11  | 0.31 | 0.58 | 0.47 | 0.7  | 7.78 | 7.27 | 1.665292 | 38 | 3  | 33.62832 | 12.5       |
| MS3_02899 | 0.12  | 0.33 | 0.59 | 0.45 | 0.72 | 7.79 | 8.06 | 0.763379 | 19 | 8  | 16.81416 | 33.3333333 |
| MS3_00447 | 0.12  | 0.33 | 0.61 | 0.48 | 0.75 | 8.17 | 7.91 | 1.29693  | 45 | 6  | 39.82301 | 25         |
| MS3_02085 | 0.12  | 0.33 | 0.6  | 0.47 | 0.73 | 9.22 | 8.84 | 1.462285 | 95 | 16 | 84.0708  | 66.6666667 |
| MS3_05219 | 0.12  | 0.33 | 0.62 | 0.49 | 0.75 | 7.92 | 7.63 | 1.336428 | 29 | 4  | 25.66372 | 16.6666667 |
| MS3_05761 | 0.12  | 0.33 | 0.61 | 0.48 | 0.73 | 6.22 | 6.52 | 0.740817 | 1  | 1  | 0.884956 | 4.16666667 |
| MS3_09086 | 0.12  | 0.34 | 0.61 | 0.48 | 0.74 | 6.88 | 7.17 | 0.748263 | 3  | 2  | 2.654867 | 8.33333333 |
| MS3_10161 | 0.12  | 0.34 | 0.59 | 0.46 | 0.73 | 7.78 | 7.4  | 1.462285 | 29 | 4  | 25.66372 | 16.6666667 |
| MS3_10820 | 0.12  | 0.34 | 0.62 | 0.5  | 0.74 | 7.07 | 7.36 | 0.748263 | 10 | 2  | 8.849558 | 8.33333333 |
| MS3_00242 | 0.13  | 0.35 | 0.62 | 0.49 | 0.75 | 7.97 | 7.49 | 1.616075 | 48 | 7  | 42.47788 | 29.1666667 |
| MS3_00412 | 0.13  | 0.35 | 0.61 | 0.48 | 0.73 | 8.12 | 7.86 | 1.29693  | 43 | 6  | 38.0531  | 25         |
| MS3_01964 | 0.13  | 0.36 | 0.6  | 0.48 | 0.71 | 7.2  | 7.48 | 0.755784 | 11 | 3  | 9.734513 | 12.5       |
| MS3_02289 | 0.13  | 0.35 | 0.61 | 0.48 | 0.75 | 7.87 | 8.13 | 0.771052 | 24 | 11 | 21.23894 | 45.8333333 |
| MS3_03400 | 0.13  | 0.36 | 0.6  | 0.48 | 0.73 | 8.14 | 7.91 | 1.2586   | 38 | 5  | 33.62832 | 20.8333333 |
| MS3_03992 | 0.13  | 0.36 | 0.62 | 0.49 | 0.76 | 7.62 | 7.97 | 0.704688 | 20 | 11 | 17.69912 | 45.8333333 |
| MS3_05351 | 0.13  | 0.35 | 0.6  | 0.49 | 0.71 | 6.52 | 6.8  | 0.755783 | 3  | 1  | 2.654867 | 4.16666667 |
| MS3_06167 | 0.13  | 0.36 | 0.42 | 0.3  | 0.55 | 6.88 | 6.49 | 1.476983 | 14 | 1  | 12.38938 | 4.16666667 |

|           |      |      |      |      |      |      |      |          |    |    |          |            |
|-----------|------|------|------|------|------|------|------|----------|----|----|----------|------------|
| MS3_06740 | 0.13 | 0.35 | 0.59 | 0.46 | 0.72 | 7.92 | 7.65 | 1.309965 | 34 | 6  | 30.0885  | 25         |
| MS3_07419 | 0.13 | 0.36 | 0.6  | 0.49 | 0.72 | 7.69 | 8.04 | 0.704688 | 25 | 8  | 22.12389 | 33.3333333 |
| MS3_08399 | 0.13 | 0.36 | 0.6  | 0.47 | 0.72 | 7.44 | 6.97 | 1.599995 | 38 | 4  | 33.62832 | 16.6666667 |
| MS3_08891 | 0.13 | 0.36 | 0.61 | 0.49 | 0.74 | 7.03 | 7.34 | 0.733447 | 8  | 4  | 7.079646 | 16.6666667 |
| MS3_09175 | 0.13 | 0.36 | 0.61 | 0.48 | 0.74 | 6.71 | 7.05 | 0.71177  | 5  | 4  | 4.424779 | 16.6666667 |
| MS3_09426 | 0.13 | 0.36 | 0.6  | 0.48 | 0.71 | 6.77 | 7.07 | 0.740818 | 5  | 3  | 4.424779 | 12.5       |
| MS3_02838 | 0.14 | 0.37 | 0.6  | 0.48 | 0.72 | 8.02 | 7.8  | 1.246077 | 36 | 5  | 31.85841 | 20.8333333 |
| MS3_03119 | 0.14 | 0.37 | 0.59 | 0.47 | 0.72 | 7.53 | 7.23 | 1.349859 | 15 | 2  | 13.27434 | 8.33333333 |
| MS3_03625 | 0.14 | 0.37 | 0.59 | 0.47 | 0.71 | 7.73 | 7.48 | 1.284026 | 23 | 2  | 20.35398 | 8.33333333 |
| MS3_04268 | 0.14 | 0.37 | 0.61 | 0.48 | 0.73 | 6.99 | 7.27 | 0.755783 | 7  | 1  | 6.19469  | 4.16666667 |
| MS3_04799 | 0.14 | 0.37 | 0.63 | 0.51 | 0.76 | 6.78 | 7.1  | 0.726149 | 9  | 1  | 7.964602 | 4.16666667 |
| MS3_05142 | 0.14 | 0.36 | 0.62 | 0.48 | 0.76 | 7.89 | 8.19 | 0.740818 | 31 | 10 | 27.43363 | 41.6666667 |
| MS3_06080 | 0.14 | 0.38 | 0.6  | 0.47 | 0.73 | 7.59 | 7.9  | 0.733447 | 21 | 7  | 18.58407 | 29.1666667 |
| MS3_06649 | 0.14 | 0.38 | 0.64 | 0.51 | 0.78 | 8.38 | 7.87 | 1.665291 | 57 | 7  | 50.44248 | 29.1666667 |
| MS3_06745 | 0.14 | 0.37 | 0.56 | 0.43 | 0.69 | 7.96 | 7.73 | 1.2586   | 28 | 4  | 24.77876 | 16.6666667 |
| No hits   | 0.15 | 0.39 | 0.59 | 0.45 | 0.73 | 7.8  | 7.35 | 1.568313 | 33 | 6  | 29.20354 | 25         |
| MS3_01218 | 0.15 | 0.38 | 0.61 | 0.49 | 0.74 | 7.99 | 8.23 | 0.786628 | 34 | 10 | 30.0885  | 41.6666667 |
| MS3_01318 | 0.15 | 0.39 | 0.59 | 0.46 | 0.73 | 8.35 | 7.91 | 1.552707 | 58 | 11 | 51.32743 | 45.8333333 |
| MS3_01504 | 0.15 | 0.39 | 0.6  | 0.48 | 0.72 | 7.56 | 7.81 | 0.778801 | 22 | 5  | 19.46903 | 20.8333333 |
| MS3_01600 | 0.15 | 0.39 | 0.59 | 0.46 | 0.71 | 8.29 | 7.92 | 1.447735 | 57 | 9  | 50.44248 | 37.5       |
| MS3_01972 | 0.15 | 0.39 | 0.6  | 0.49 | 0.71 | 7.88 | 7.59 | 1.336428 | 40 | 3  | 35.39823 | 12.5       |
| MS3_02681 | 0.15 | 0.38 | 0.58 | 0.45 | 0.71 | 7.87 | 7.57 | 1.349859 | 31 | 6  | 27.43363 | 25         |
| MS3_03054 | 0.15 | 0.39 | 0.6  | 0.46 | 0.75 | 8.36 | 8.68 | 0.726149 | 62 | 14 | 54.86726 | 58.3333333 |
| MS3_04227 | 0.15 | 0.38 | 0.59 | 0.47 | 0.71 | 8.06 | 7.82 | 1.271249 | 43 | 5  | 38.0531  | 20.8333333 |
| MS3_06161 | 0.15 | 0.38 | 0.58 | 0.46 | 0.71 | 8.1  | 7.8  | 1.349859 | 49 | 6  | 43.36283 | 25         |
| MS3_08440 | 0.15 | 0.38 | 0.6  | 0.47 | 0.73 | 7.76 | 8.08 | 0.726149 | 24 | 10 | 21.23894 | 41.6666667 |
| MS3_09415 | 0.15 | 0.38 | 0.62 | 0.49 | 0.74 | 7.54 | 7.82 | 0.755784 | 18 | 6  | 15.9292  | 25         |
| MS3_00785 | 0.16 | 0.39 | 0.6  | 0.47 | 0.73 | 7.22 | 6.79 | 1.537259 | 22 | 3  | 19.46903 | 12.5       |
| MS3_02460 | 0.16 | 0.4  | 0.59 | 0.46 | 0.72 | 8    | 7.73 | 1.309965 | 31 | 4  | 27.43363 | 16.6666667 |
| MS3_03127 | 0.16 | 0.39 | 0.61 | 0.49 | 0.73 | 6.93 | 7.2  | 0.763379 | 7  | 0  | 6.19469  | 0          |
| MS3_03270 | 0.16 | 0.39 | 0.61 | 0.48 | 0.73 | 7.79 | 8.03 | 0.786628 | 24 | 8  | 21.23894 | 33.3333333 |
| MS3_05370 | 0.16 | 0.4  | 0.61 | 0.49 | 0.74 | 7.04 | 7.29 | 0.778801 | 7  | 1  | 6.19469  | 4.16666667 |
| MS3_05391 | 0.16 | 0.4  | 0.6  | 0.46 | 0.74 | 7.32 | 7.64 | 0.726149 | 12 | 8  | 10.61947 | 33.3333333 |
| MS3_06769 | 0.16 | 0.4  | 0.59 | 0.47 | 0.7  | 7.39 | 7.15 | 1.271249 | 14 | 2  | 12.38938 | 8.33333333 |
| MS3_08655 | 0.16 | 0.4  | 0.59 | 0.46 | 0.72 | 7.05 | 7.37 | 0.726149 | 9  | 5  | 7.964602 | 20.8333333 |
| MS3_09569 | 0.16 | 0.4  | 0.58 | 0.47 | 0.69 | 7.84 | 8.05 | 0.810584 | 30 | 7  | 26.54867 | 29.1666667 |
| MS3_09620 | 0.16 | 0.4  | 0.59 | 0.48 | 0.7  | 7.93 | 7.71 | 1.246077 | 39 | 4  | 34.51327 | 16.6666667 |

|           |      |      |      |      |      |      |      |          |    |    |          |            |
|-----------|------|------|------|------|------|------|------|----------|----|----|----------|------------|
| MS3_09739 | 0.16 | 0.39 | 0.62 | 0.48 | 0.75 | 7.42 | 7.67 | 0.778801 | 9  | 5  | 7.964602 | 20.8333333 |
| MS3_10116 | 0.16 | 0.39 | 0.6  | 0.48 | 0.71 | 8.42 | 8.15 | 1.309964 | 64 | 9  | 56.63717 | 37.5       |
| MS3_10513 | 0.16 | 0.4  | 0.59 | 0.45 | 0.73 | 7.53 | 7.28 | 1.284026 | 14 | 3  | 12.38938 | 12.5       |
| MS3_10588 | 0.16 | 0.4  | 0.61 | 0.49 | 0.73 | 6.71 | 6.18 | 1.698937 | 26 | 3  | 23.00885 | 12.5       |
| MS3_10590 | 0.16 | 0.4  | 0.6  | 0.46 | 0.73 | 7.22 | 6.86 | 1.43333  | 13 | 3  | 11.50442 | 12.5       |
| MS3_11376 | 0.16 | 0.39 | 0.6  | 0.46 | 0.73 | 7.82 | 8.07 | 0.778801 | 24 | 9  | 21.23894 | 37.5       |
| MS3_00316 | 0.17 | 0.4  | 0.59 | 0.44 | 0.73 | 6.79 | 7.1  | 0.733447 | 3  | 2  | 2.654867 | 8.33333333 |
| MS3_02999 | 0.17 | 0.4  | 0.61 | 0.48 | 0.73 | 7.08 | 6.71 | 1.447736 | 18 | 3  | 15.9292  | 12.5       |
| MS3_03641 | 0.17 | 0.41 | 0.55 | 0.43 | 0.67 | 8.82 | 9.1  | 0.755784 | 77 | 17 | 68.14159 | 70.8333333 |
| MS3_03695 | 0.17 | 0.4  | 0.6  | 0.47 | 0.72 | 6.26 | 5.93 | 1.390973 | 9  | 0  | 7.964602 | 0          |
| MS3_04279 | 0.17 | 0.4  | 0.56 | 0.45 | 0.68 | 7.52 | 7.21 | 1.363425 | 27 | 3  | 23.89381 | 12.5       |
| MS3_04347 | 0.17 | 0.4  | 0.6  | 0.48 | 0.72 | 8.38 | 8.61 | 0.794534 | 58 | 17 | 51.32743 | 70.8333333 |
| MS3_09231 | 0.17 | 0.4  | 0.59 | 0.44 | 0.74 | 7.6  | 7.9  | 0.740818 | 20 | 10 | 17.69912 | 41.6666667 |
| MS3_10803 | 0.17 | 0.4  | 0.61 | 0.47 | 0.76 | 8.55 | 8.92 | 0.690734 | 76 | 16 | 67.25664 | 66.6666667 |
| MS3_11544 | 0.17 | 0.4  | 0.59 | 0.47 | 0.71 | 7.95 | 7.62 | 1.390968 | 42 | 6  | 37.16814 | 25         |
| MS3_10847 | 0.18 | 0.42 | 0.58 | 0.44 | 0.72 | 8.51 | 8.11 | 1.491825 | 70 | 11 | 61.9469  | 45.8333333 |
| MS3_01328 | 0.18 | 0.42 | 0.58 | 0.44 | 0.72 | 8.4  | 8.02 | 1.462285 | 67 | 12 | 59.29204 | 50         |
| MS3_01516 | 0.18 | 0.42 | 0.6  | 0.47 | 0.72 | 7.49 | 7.79 | 0.740818 | 25 | 7  | 22.12389 | 29.1666667 |
| MS3_01527 | 0.18 | 0.41 | 0.6  | 0.47 | 0.74 | 7.24 | 7.64 | 0.67032  | 18 | 8  | 15.9292  | 33.3333333 |
| MS3_01833 | 0.18 | 0.42 | 0.57 | 0.45 | 0.69 | 7.23 | 7.59 | 0.697676 | 26 | 8  | 23.00885 | 33.3333333 |
| MS3_01952 | 0.18 | 0.42 | 0.56 | 0.43 | 0.68 | 7.65 | 7.86 | 0.810584 | 12 | 6  | 10.61947 | 25         |
| MS3_02136 | 0.18 | 0.42 | 0.59 | 0.46 | 0.72 | 7.69 | 7.26 | 1.537258 | 38 | 7  | 33.62832 | 29.1666667 |
| MS3_02489 | 0.18 | 0.42 | 0.59 | 0.47 | 0.72 | 7.36 | 7.63 | 0.763379 | 10 | 3  | 8.849558 | 12.5       |
| MS3_03789 | 0.18 | 0.42 | 0.54 | 0.43 | 0.64 | 7.42 | 7.1  | 1.377128 | 24 | 1  | 21.23894 | 4.16666667 |
| MS3_05038 | 0.18 | 0.42 | 0.6  | 0.47 | 0.73 | 7.4  | 7.04 | 1.43333  | 27 | 3  | 23.89381 | 12.5       |
| MS3_05203 | 0.18 | 0.42 | 0.6  | 0.48 | 0.72 | 7.58 | 7.32 | 1.29693  | 25 | 4  | 22.12389 | 16.6666667 |
| MS3_05216 | 0.18 | 0.42 | 0.61 | 0.47 | 0.75 | 7.77 | 7.36 | 1.506818 | 40 | 6  | 35.39823 | 25         |
| MS3_07487 | 0.18 | 0.42 | 0.61 | 0.48 | 0.74 | 7.82 | 7.55 | 1.309965 | 27 | 4  | 23.89381 | 16.6666667 |
| MS3_07905 | 0.18 | 0.42 | 0.43 | 0.31 | 0.56 | 6.73 | 7.06 | 0.718923 | 10 | 2  | 8.849558 | 8.33333333 |
| MS3_09640 | 0.18 | 0.42 | 0.57 | 0.44 | 0.71 | 7.69 | 7.29 | 1.491825 | 26 | 6  | 23.00885 | 25         |
| MS3_00196 | 0.19 | 0.43 | 0.59 | 0.46 | 0.72 | 7.73 | 8.23 | 0.606531 | 28 | 10 | 24.77876 | 41.6666667 |
| MS3_01004 | 0.19 | 0.43 | 0.59 | 0.45 | 0.72 | 8.82 | 9.12 | 0.740818 | 79 | 19 | 69.9115  | 79.1666667 |
| MS3_01686 | 0.19 | 0.43 | 0.58 | 0.45 | 0.7  | 7.46 | 7.24 | 1.246077 | 7  | 2  | 6.19469  | 8.33333333 |
| MS3_01898 | 0.19 | 0.43 | 0.58 | 0.46 | 0.71 | 8.33 | 8.58 | 0.778801 | 58 | 18 | 51.32743 | 75         |
| MS3_04550 | 0.19 | 0.43 | 0.58 | 0.45 | 0.7  | 7.33 | 7.58 | 0.778801 | 11 | 5  | 9.734513 | 20.8333333 |
| MS3_05040 | 0.19 | 0.43 | 0.59 | 0.45 | 0.73 | 7.59 | 7.89 | 0.740818 | 22 | 8  | 19.46903 | 33.3333333 |
| MS3_05465 | 0.19 | 0.43 | 0.57 | 0.42 | 0.72 | 8.09 | 7.8  | 1.336428 | 39 | 9  | 34.51327 | 37.5       |

|           |      |      |      |      |      |      |      |          |     |    |          |            |
|-----------|------|------|------|------|------|------|------|----------|-----|----|----------|------------|
| MS3_08059 | 0.19 | 0.43 | 0.58 | 0.45 | 0.71 | 6.67 | 6.94 | 0.763379 | 4   | 2  | 3.539823 | 8.33333333 |
| MS3_08361 | 0.19 | 0.43 | 0.6  | 0.47 | 0.73 | 6.97 | 6.62 | 1.419069 | 14  | 2  | 12.38938 | 8.33333333 |
| MS3_08480 | 0.19 | 0.43 | 0.58 | 0.45 | 0.72 | 9.6  | 9.23 | 1.447735 | 104 | 18 | 92.0354  | 75         |
| MS3_09290 | 0.19 | 0.43 | 0.59 | 0.45 | 0.73 | 6.74 | 7.1  | 0.697676 | 8   | 4  | 7.079646 | 16.6666667 |
| MS3_09662 | 0.19 | 0.43 | 0.6  | 0.47 | 0.73 | 6.61 | 6.88 | 0.763379 | 7   | 2  | 6.19469  | 8.33333333 |
| MS3_09810 | 0.19 | 0.43 | 0.6  | 0.48 | 0.72 | 8.83 | 8.48 | 1.419068 | 80  | 12 | 70.79646 | 50         |
| MS3_10600 | 0.19 | 0.43 | 0.58 | 0.47 | 0.7  | 6.96 | 6.66 | 1.34986  | 15  | 2  | 13.27434 | 8.33333333 |
| MS3_11509 | 0.19 | 0.43 | 0.59 | 0.46 | 0.72 | 7.89 | 7.64 | 1.284026 | 34  | 6  | 30.0885  | 25         |
| MS3_00668 | 0.2  | 0.43 | 0.58 | 0.46 | 0.7  | 8.31 | 7.97 | 1.404948 | 57  | 10 | 50.44248 | 41.6666667 |
| MS3_01014 | 0.2  | 0.44 | 0.59 | 0.46 | 0.71 | 6.85 | 6.56 | 1.336429 | 10  | 1  | 8.849558 | 4.16666667 |
| MS3_02155 | 0.2  | 0.44 | 0.57 | 0.43 | 0.7  | 7.57 | 7.77 | 0.818731 | 13  | 6  | 11.50442 | 25         |
| MS3_05387 | 0.2  | 0.44 | 0.58 | 0.45 | 0.71 | 6.89 | 7.17 | 0.755783 | 6   | 3  | 5.309735 | 12.5       |
| MS3_06327 | 0.2  | 0.44 | 0.59 | 0.47 | 0.71 | 6.6  | 6.87 | 0.763379 | 4   | 2  | 3.539823 | 8.33333333 |
| MS3_06583 | 0.2  | 0.44 | 0.57 | 0.45 | 0.7  | 7.27 | 6.92 | 1.419068 | 21  | 3  | 18.58407 | 12.5       |
| MS3_08504 | 0.2  | 0.44 | 0.57 | 0.45 | 0.68 | 7.47 | 7.7  | 0.794534 | 23  | 4  | 20.35398 | 16.6666667 |
| MS3_09119 | 0.2  | 0.44 | 0.63 | 0.52 | 0.74 | 7.74 | 8.02 | 0.755784 | 24  | 8  | 21.23894 | 33.3333333 |
| MS3_01051 | 0.21 | 0.45 | 0.6  | 0.47 | 0.74 | 7.88 | 8.1  | 0.802519 | 26  | 12 | 23.00885 | 50         |
| MS3_01153 | 0.21 | 0.45 | 0.6  | 0.47 | 0.73 | 7.21 | 7.5  | 0.748263 | 11  | 4  | 9.734513 | 16.6666667 |
| MS3_01333 | 0.21 | 0.46 | 0.57 | 0.43 | 0.71 | 6.05 | 6.35 | 0.740816 | 0   | 1  | 0        | 4.16666667 |
| MS3_01710 | 0.21 | 0.45 | 0.6  | 0.47 | 0.73 | 7.69 | 7.92 | 0.794534 | 18  | 6  | 15.9292  | 25         |
| MS3_04011 | 0.21 | 0.45 | 0.58 | 0.45 | 0.71 | 6.68 | 6.34 | 1.40495  | 4   | 2  | 3.539823 | 8.33333333 |
| MS3_04375 | 0.21 | 0.46 | 0.58 | 0.46 | 0.71 | 7.17 | 7.46 | 0.748263 | 13  | 4  | 11.50442 | 16.6666667 |
| MS3_07105 | 0.21 | 0.45 | 0.6  | 0.46 | 0.73 | 7.2  | 7.5  | 0.740818 | 14  | 5  | 12.38938 | 20.8333333 |
| MS3_09510 | 0.21 | 0.45 | 0.6  | 0.48 | 0.71 | 7.36 | 7.01 | 1.419068 | 33  | 3  | 29.20354 | 12.5       |
| MS3_10148 | 0.22 | 0.46 | 0.59 | 0.47 | 0.71 | 8.3  | 8.02 | 1.32313  | 61  | 12 | 53.9823  | 50         |
| MS3_01611 | 0.22 | 0.46 | 0.58 | 0.46 | 0.7  | 7.83 | 8.04 | 0.810584 | 32  | 9  | 28.31858 | 37.5       |
| MS3_04526 | 0.22 | 0.47 | 0.56 | 0.42 | 0.7  | 7.08 | 7.47 | 0.677057 | 16  | 6  | 14.15929 | 25         |
| MS3_04595 | 0.22 | 0.46 | 0.59 | 0.47 | 0.71 | 7.55 | 7.24 | 1.363425 | 26  | 3  | 23.00885 | 12.5       |
| MS3_04932 | 0.22 | 0.47 | 0.56 | 0.44 | 0.69 | 7.12 | 7.44 | 0.726149 | 20  | 5  | 17.69912 | 20.8333333 |
| MS3_05289 | 0.22 | 0.47 | 0.58 | 0.45 | 0.72 | 7.75 | 7.96 | 0.810584 | 20  | 8  | 17.69912 | 33.3333333 |
| MS3_08539 | 0.22 | 0.46 | 0.56 | 0.43 | 0.68 | 7.53 | 7.77 | 0.786628 | 15  | 6  | 13.27434 | 25         |
| MS3_03817 | 0.23 | 0.47 | 0.59 | 0.46 | 0.72 | 8.09 | 7.73 | 1.43333  | 51  | 7  | 45.13274 | 29.1666667 |
| MS3_04355 | 0.23 | 0.48 | 0.58 | 0.44 | 0.73 | 7.67 | 7.44 | 1.2586   | 17  | 3  | 15.04425 | 12.5       |
| MS3_04873 | 0.23 | 0.47 | 0.57 | 0.44 | 0.71 | 8.19 | 7.92 | 1.309965 | 50  | 9  | 44.24779 | 37.5       |
| MS3_05337 | 0.23 | 0.47 | 0.59 | 0.47 | 0.71 | 7.54 | 7.75 | 0.810584 | 19  | 5  | 16.81416 | 20.8333333 |
| MS3_06248 | 0.23 | 0.47 | 0.59 | 0.47 | 0.72 | 8.22 | 7.92 | 1.349859 | 57  | 8  | 50.44248 | 33.3333333 |
| MS3_09160 | 0.23 | 0.49 | 0.58 | 0.44 | 0.73 | 7.03 | 7.25 | 0.802519 | 6   | 1  | 5.309735 | 4.16666667 |



|           |      |      |      |      |      |      |      |          |    |    |          |            |
|-----------|------|------|------|------|------|------|------|----------|----|----|----------|------------|
| MS3_09828 | 0.23 | 0.48 | 0.61 | 0.51 | 0.72 | 7.42 | 7.61 | 0.826959 | 17 | 3  | 15.04425 | 12.5       |
| MS3_11484 | 0.24 | 0.49 | 0.59 | 0.46 | 0.71 | 7.18 | 6.85 | 1.390969 | 23 | 3  | 20.35398 | 12.5       |
| MS3_00452 | 0.24 | 0.49 | 0.58 | 0.45 | 0.71 | 7.82 | 8.01 | 0.826959 | 24 | 6  | 21.23894 | 25         |
| MS3_01016 | 0.24 | 0.49 | 0.6  | 0.48 | 0.72 | 7.69 | 7.37 | 1.377128 | 37 | 3  | 32.74336 | 12.5       |
| MS3_01114 | 0.24 | 0.49 | 0.59 | 0.46 | 0.72 | 7.12 | 7.36 | 0.786628 | 6  | 3  | 5.309735 | 12.5       |
| MS3_01245 | 0.24 | 0.49 | 0.57 | 0.45 | 0.69 | 7.55 | 7.74 | 0.826959 | 15 | 4  | 13.27434 | 16.6666667 |
| MS3_03933 | 0.24 | 0.49 | 0.57 | 0.42 | 0.73 | 7.67 | 7.94 | 0.763379 | 19 | 10 | 16.81416 | 41.6666667 |
| MS3_04063 | 0.24 | 0.49 | 0.6  | 0.46 | 0.74 | 7.18 | 7.46 | 0.755784 | 8  | 3  | 7.079646 | 12.5       |
| MS3_06108 | 0.24 | 0.49 | 0.57 | 0.44 | 0.7  | 7.59 | 7.23 | 1.43333  | 33 | 5  | 29.20354 | 20.8333333 |
| MS3_06449 | 0.24 | 0.49 | 0.58 | 0.45 | 0.7  | 7.91 | 7.69 | 1.246077 | 32 | 5  | 28.31858 | 20.8333333 |
| MS3_06828 | 0.24 | 0.49 | 0.6  | 0.47 | 0.72 | 6.9  | 7.21 | 0.733447 | 13 | 3  | 11.50442 | 12.5       |
| MS3_06832 | 0.24 | 0.49 | 0.58 | 0.45 | 0.7  | 7.07 | 7.29 | 0.802519 | 8  | 3  | 7.079646 | 12.5       |
| MS3_09473 | 0.24 | 0.49 | 0.58 | 0.45 | 0.71 | 7.06 | 6.73 | 1.390969 | 17 | 2  | 15.04425 | 8.33333333 |
| No hits   | 0.25 | 0.49 | 0.58 | 0.45 | 0.71 | 7.75 | 7.42 | 1.390968 | 40 | 6  | 35.39823 | 25         |
| MS3_01105 | 0.25 | 0.49 | 0.58 | 0.46 | 0.7  | 6.94 | 6.68 | 1.296931 | 14 | 1  | 12.38938 | 4.16666667 |
| MS3_01286 | 0.25 | 0.49 | 0.6  | 0.49 | 0.71 | 6.48 | 6.68 | 0.81873  | 5  | 0  | 4.424779 | 0          |
| MS3_02234 | 0.25 | 0.5  | 0.58 | 0.46 | 0.71 | 7.3  | 7.56 | 0.771051 | 18 | 6  | 15.9292  | 25         |
| MS3_03381 | 0.25 | 0.49 | 0.59 | 0.46 | 0.72 | 7.45 | 7.68 | 0.794534 | 12 | 6  | 10.61947 | 25         |
| MS3_04285 | 0.25 | 0.49 | 0.58 | 0.45 | 0.7  | 7.6  | 7.19 | 1.506818 | 31 | 5  | 27.43363 | 20.8333333 |
| MS3_04767 | 0.25 | 0.5  | 0.59 | 0.45 | 0.73 | 7.96 | 7.75 | 1.233678 | 31 | 5  | 27.43363 | 20.8333333 |
| MS3_05000 | 0.25 | 0.49 | 0.44 | 0.3  | 0.59 | 6.89 | 7.14 | 0.7788   | 5  | 5  | 4.424779 | 20.8333333 |
| MS3_05230 | 0.25 | 0.5  | 0.6  | 0.44 | 0.75 | 7.79 | 8.03 | 0.786628 | 15 | 9  | 13.27434 | 37.5       |
| MS3_08509 | 0.25 | 0.5  | 0.62 | 0.49 | 0.74 | 6.24 | 5.95 | 1.336431 | 4  | 1  | 3.539823 | 4.16666667 |
| MS3_00900 | 0.26 | 0.51 | 0.58 | 0.45 | 0.72 | 7.29 | 6.93 | 1.43333  | 24 | 4  | 21.23894 | 16.6666667 |
| MS3_03824 | 0.26 | 0.51 | 0.56 | 0.45 | 0.68 | 7.17 | 6.98 | 1.20925  | 12 | 1  | 10.61947 | 4.16666667 |
| MS3_04147 | 0.26 | 0.52 | 0.58 | 0.46 | 0.7  | 6.8  | 7.01 | 0.810584 | 6  | 0  | 5.309735 | 0          |
| MS3_07213 | 0.26 | 0.51 | 0.6  | 0.48 | 0.71 | 6.98 | 7.29 | 0.733447 | 15 | 2  | 13.27434 | 8.33333333 |
| MS3_07729 | 0.26 | 0.51 | 0.58 | 0.47 | 0.7  | 7.58 | 7.79 | 0.810584 | 24 | 7  | 21.23894 | 29.1666667 |
| MS3_08000 | 0.26 | 0.5  | 0.58 | 0.46 | 0.7  | 7.21 | 7.43 | 0.802519 | 6  | 1  | 5.309735 | 4.16666667 |
| MS3_09958 | 0.26 | 0.5  | 0.58 | 0.46 | 0.69 | 7.2  | 6.89 | 1.363426 | 24 | 2  | 21.23894 | 8.33333333 |
| MS3_08446 | 0.27 | 0.52 | 0.58 | 0.46 | 0.7  | 7.58 | 7.38 | 1.221403 | 18 | 3  | 15.9292  | 12.5       |
| MS3_00312 | 0.27 | 0.53 | 0.45 | 0.31 | 0.59 | 8.87 | 8.56 | 1.363425 | 86 | 15 | 76.10619 | 62.5       |
| MS3_03577 | 0.27 | 0.53 | 0.57 | 0.44 | 0.69 | 7.79 | 7.55 | 1.271249 | 35 | 4  | 30.97345 | 16.6666667 |
| MS3_03599 | 0.27 | 0.52 | 0.58 | 0.46 | 0.71 | 8.38 | 8.61 | 0.794534 | 59 | 17 | 52.21239 | 70.8333333 |
| MS3_04774 | 0.27 | 0.52 | 0.58 | 0.44 | 0.72 | 6.72 | 6.49 | 1.258601 | 6  | 1  | 5.309735 | 4.16666667 |
| MS3_11226 | 0.27 | 0.52 | 0.56 | 0.42 | 0.71 | 7.23 | 7.46 | 0.794533 | 9  | 4  | 7.964602 | 16.6666667 |
| MS3_00054 | 0.28 | 0.53 | 0.56 | 0.43 | 0.69 | 7.38 | 7.57 | 0.826959 | 7  | 4  | 6.19469  | 16.6666667 |

|           |      |      |      |      |      |      |      |          |    |    |          |            |
|-----------|------|------|------|------|------|------|------|----------|----|----|----------|------------|
| MS3_02087 | 0.28 | 0.53 | 0.53 | 0.41 | 0.66 | 8.03 | 7.81 | 1.246077 | 34 | 4  | 30.0885  | 16.6666667 |
| MS3_02160 | 0.28 | 0.53 | 0.55 | 0.41 | 0.68 | 7.06 | 7.27 | 0.810584 | 7  | 3  | 6.19469  | 12.5       |
| MS3_03775 | 0.28 | 0.53 | 0.58 | 0.44 | 0.71 | 7.81 | 7.51 | 1.349859 | 43 | 7  | 38.0531  | 29.1666667 |
| MS3_05735 | 0.28 | 0.53 | 0.56 | 0.45 | 0.67 | 7.98 | 7.77 | 1.233678 | 47 | 5  | 41.59292 | 20.8333333 |
| MS3_06592 | 0.28 | 0.53 | 0.57 | 0.44 | 0.71 | 6.63 | 6.84 | 0.810584 | 5  | 0  | 4.424779 | 0          |
| MS3_09073 | 0.28 | 0.53 | 0.57 | 0.44 | 0.71 | 6.72 | 6.92 | 0.81873  | 5  | 0  | 4.424779 | 0          |
| MS3_09427 | 0.28 | 0.53 | 0.58 | 0.44 | 0.71 | 7.19 | 7.38 | 0.826959 | 5  | 2  | 4.424779 | 8.33333333 |
| MS3_09638 | 0.28 | 0.53 | 0.57 | 0.44 | 0.7  | 6.75 | 7.01 | 0.771051 | 5  | 3  | 4.424779 | 12.5       |
| MS3_10489 | 0.28 | 0.53 | 0.57 | 0.43 | 0.71 | 7.25 | 7.45 | 0.818731 | 9  | 2  | 7.964602 | 8.33333333 |
| MS3_11074 | 0.28 | 0.53 | 0.58 | 0.43 | 0.73 | 7.39 | 7.61 | 0.802519 | 10 | 6  | 8.849558 | 25         |
| MS3_00294 | 0.29 | 0.55 | 0.56 | 0.42 | 0.7  | 7.85 | 7.64 | 1.233678 | 28 | 6  | 24.77876 | 25         |
| MS3_01934 | 0.29 | 0.54 | 0.57 | 0.44 | 0.7  | 6.51 | 6.71 | 0.81873  | 5  | 1  | 4.424779 | 4.16666667 |
| MS3_02494 | 0.29 | 0.54 | 0.57 | 0.44 | 0.71 | 7.23 | 7.4  | 0.843665 | 6  | 2  | 5.309735 | 8.33333333 |
| MS3_05586 | 0.29 | 0.55 | 0.55 | 0.44 | 0.66 | 7.64 | 7.84 | 0.818731 | 29 | 7  | 25.66372 | 29.1666667 |
| MS3_07944 | 0.29 | 0.54 | 0.58 | 0.46 | 0.7  | 7.6  | 7.83 | 0.794534 | 26 | 8  | 23.00885 | 33.3333333 |
| MS3_11537 | 0.3  | 0.55 | 0.58 | 0.46 | 0.7  | 8.38 | 8.22 | 1.173511 | 60 | 9  | 53.09735 | 37.5       |
| MS3_00440 | 0.3  | 0.55 | 0.56 | 0.45 | 0.67 | 7.31 | 7.49 | 0.83527  | 14 | 2  | 12.38938 | 8.33333333 |
| MS3_00931 | 0.3  | 0.55 | 0.47 | 0.34 | 0.6  | 8.02 | 7.66 | 1.43333  | 40 | 7  | 35.39823 | 29.1666667 |
| MS3_01386 | 0.3  | 0.56 | 0.58 | 0.46 | 0.71 | 7.7  | 7.9  | 0.818731 | 23 | 7  | 20.35398 | 29.1666667 |
| MS3_01406 | 0.3  | 0.55 | 0.55 | 0.42 | 0.67 | 8.41 | 8.23 | 1.197217 | 60 | 11 | 53.09735 | 45.8333333 |
| MS3_02545 | 0.3  | 0.55 | 0.57 | 0.46 | 0.68 | 7.49 | 7.68 | 0.826959 | 22 | 5  | 19.46903 | 20.8333333 |
| MS3_03776 | 0.3  | 0.55 | 0.56 | 0.42 | 0.7  | 7.04 | 7.32 | 0.755783 | 11 | 6  | 9.734513 | 25         |
| MS3_04981 | 0.3  | 0.55 | 0.57 | 0.45 | 0.7  | 7.33 | 7.05 | 1.32313  | 23 | 3  | 20.35398 | 12.5       |
| MS3_05945 | 0.3  | 0.55 | 0.57 | 0.44 | 0.7  | 7.35 | 7.58 | 0.794533 | 16 | 4  | 14.15929 | 16.6666667 |
| MS3_06539 | 0.3  | 0.56 | 0.56 | 0.43 | 0.69 | 6.04 | 6.27 | 0.794532 | 1  | 1  | 0.884956 | 4.16666667 |
| MS3_07390 | 0.3  | 0.55 | 0.57 | 0.44 | 0.71 | 6.86 | 6.5  | 1.433331 | 17 | 3  | 15.04425 | 12.5       |
| MS3_08262 | 0.3  | 0.55 | 0.55 | 0.44 | 0.66 | 7.48 | 7.3  | 1.197218 | 24 | 1  | 21.23894 | 4.16666667 |
| MS3_10736 | 0.3  | 0.55 | 0.53 | 0.42 | 0.64 | 7.59 | 7.39 | 1.221403 | 22 | 3  | 19.46903 | 12.5       |
| MS3_01049 | 0.31 | 0.56 | 0.57 | 0.46 | 0.68 | 7.82 | 8.01 | 0.826959 | 32 | 7  | 28.31858 | 29.1666667 |
| MS3_01988 | 0.31 | 0.56 | 0.57 | 0.44 | 0.7  | 7.66 | 7.38 | 1.32313  | 32 | 5  | 28.31858 | 20.8333333 |
| MS3_02504 | 0.31 | 0.56 | 0.48 | 0.35 | 0.6  | 7.96 | 8.14 | 0.83527  | 41 | 7  | 36.28319 | 29.1666667 |
| MS3_06214 | 0.31 | 0.57 | 0.57 | 0.44 | 0.69 | 7.78 | 7.59 | 1.20925  | 26 | 2  | 23.00885 | 8.33333333 |
| MS3_06348 | 0.31 | 0.56 | 0.59 | 0.47 | 0.7  | 7.27 | 7    | 1.309965 | 21 | 2  | 18.58407 | 8.33333333 |
| MS3_06471 | 0.31 | 0.56 | 0.55 | 0.42 | 0.68 | 7.79 | 7.59 | 1.221403 | 23 | 5  | 20.35398 | 20.8333333 |
| MS3_10187 | 0.31 | 0.56 | 0.57 | 0.46 | 0.68 | 7.86 | 7.59 | 1.309965 | 47 | 8  | 41.59292 | 33.3333333 |
| MS3_09353 | 0.32 | 0.57 | 0.6  | 0.45 | 0.74 | 7.79 | 7.97 | 0.83527  | 19 | 10 | 16.81416 | 41.6666667 |
| MS3_00143 | 0.32 | 0.57 | 0.58 | 0.44 | 0.71 | 8.04 | 8.21 | 0.843665 | 29 | 13 | 25.66372 | 54.1666667 |

|           |      |      |      |      |      |      |       |          |     |    |          |            |
|-----------|------|------|------|------|------|------|-------|----------|-----|----|----------|------------|
| MS3_00148 | 0.32 | 0.57 | 0.57 | 0.46 | 0.69 | 8.91 | 8.68  | 1.2586   | 76  | 16 | 67.25664 | 66.6666667 |
| MS3_00403 | 0.32 | 0.57 | 0.58 | 0.45 | 0.72 | 7.89 | 8.07  | 0.83527  | 27  | 10 | 23.89381 | 41.6666667 |
| MS3_01478 | 0.32 | 0.57 | 0.56 | 0.43 | 0.68 | 7.01 | 6.77  | 1.27125  | 13  | 2  | 11.50442 | 8.33333333 |
| MS3_02318 | 0.32 | 0.57 | 0.45 | 0.31 | 0.6  | 8.44 | 8.09  | 1.419068 | 63  | 13 | 55.75221 | 54.1666667 |
| MS3_03453 | 0.32 | 0.57 | 0.56 | 0.43 | 0.69 | 7.18 | 7.39  | 0.810584 | 13  | 4  | 11.50442 | 16.6666667 |
| MS3_04364 | 0.32 | 0.57 | 0.59 | 0.47 | 0.7  | 8.15 | 7.97  | 1.197217 | 52  | 6  | 46.0177  | 25         |
| MS3_04920 | 0.32 | 0.57 | 0.6  | 0.49 | 0.71 | 7.74 | 7.94  | 0.818731 | 26  | 6  | 23.00885 | 25         |
| MS3_06243 | 0.32 | 0.57 | 0.54 | 0.41 | 0.67 | 7.03 | 7.25  | 0.802519 | 9   | 4  | 7.964602 | 16.6666667 |
| MS3_07061 | 0.32 | 0.57 | 0.56 | 0.43 | 0.7  | 7.29 | 7.47  | 0.83527  | 8   | 2  | 7.079646 | 8.33333333 |
| MS3_09188 | 0.32 | 0.57 | 0.62 | 0.49 | 0.76 | 9.82 | 10.13 | 0.733447 | 101 | 23 | 89.38053 | 95.8333333 |
| MS3_10002 | 0.32 | 0.57 | 0.58 | 0.46 | 0.71 | 7.59 | 7.33  | 1.29693  | 35  | 4  | 30.97345 | 16.6666667 |
| MS3_01425 | 0.33 | 0.57 | 0.54 | 0.41 | 0.67 | 6.92 | 7.23  | 0.733447 | 14  | 4  | 12.38938 | 16.6666667 |
| MS3_03350 | 0.33 | 0.58 | 0.58 | 0.45 | 0.71 | 6.99 | 7.19  | 0.818731 | 8   | 2  | 7.079646 | 8.33333333 |
| MS3_04609 | 0.33 | 0.58 | 0.55 | 0.41 | 0.7  | 7.63 | 7.83  | 0.818731 | 18  | 7  | 15.9292  | 29.1666667 |
| MS3_09273 | 0.33 | 0.57 | 0.56 | 0.43 | 0.69 | 6.85 | 7.01  | 0.852144 | 2   | 1  | 1.769912 | 4.16666667 |
| MS3_09286 | 0.33 | 0.57 | 0.58 | 0.46 | 0.7  | 7.39 | 7.1   | 1.336428 | 34  | 2  | 30.0885  | 8.33333333 |
| MS3_11428 | 0.33 | 0.57 | 0.54 | 0.41 | 0.66 | 8.19 | 8.36  | 0.843665 | 50  | 10 | 44.24779 | 41.6666667 |
| MS3_00286 | 0.34 | 0.59 | 0.56 | 0.44 | 0.68 | 7.56 | 7.3   | 1.29693  | 40  | 4  | 35.39823 | 16.6666667 |
| MS3_00769 | 0.34 | 0.58 | 0.55 | 0.43 | 0.67 | 7.3  | 7.13  | 1.185305 | 13  | 1  | 11.50442 | 4.16666667 |
| MS3_01650 | 0.34 | 0.58 | 0.56 | 0.44 | 0.68 | 7.36 | 7.07  | 1.336428 | 37  | 5  | 32.74336 | 20.8333333 |
| MS3_01668 | 0.34 | 0.58 | 0.54 | 0.43 | 0.66 | 8.17 | 7.95  | 1.246077 | 52  | 8  | 46.0177  | 33.3333333 |
| MS3_03856 | 0.34 | 0.58 | 0.59 | 0.47 | 0.72 | 7.5  | 7.33  | 1.185305 | 8   | 2  | 7.079646 | 8.33333333 |
| MS3_05427 | 0.34 | 0.58 | 0.57 | 0.43 | 0.7  | 7.62 | 7.79  | 0.843665 | 15  | 5  | 13.27434 | 20.8333333 |
| MS3_07520 | 0.34 | 0.58 | 0.58 | 0.45 | 0.7  | 7.66 | 7.84  | 0.83527  | 24  | 6  | 21.23894 | 25         |
| MS3_07565 | 0.34 | 0.58 | 0.58 | 0.45 | 0.72 | 7.54 | 7.74  | 0.818731 | 12  | 5  | 10.61947 | 20.8333333 |
| MS3_07685 | 0.34 | 0.58 | 0.56 | 0.43 | 0.68 | 7.13 | 7.38  | 0.778801 | 17  | 6  | 15.04425 | 25         |
| MS3_09465 | 0.34 | 0.59 | 0.57 | 0.44 | 0.7  | 7.15 | 7.32  | 0.843665 | 5   | 2  | 4.424779 | 8.33333333 |
| MS3_01124 | 0.35 | 0.6  | 0.58 | 0.44 | 0.73 | 7.83 | 8.04  | 0.810584 | 26  | 10 | 23.00885 | 41.6666667 |
| MS3_05587 | 0.35 | 0.6  | 0.57 | 0.44 | 0.69 | 6.73 | 6.94  | 0.810584 | 7   | 2  | 6.19469  | 8.33333333 |
| MS3_08503 | 0.35 | 0.59 | 0.54 | 0.42 | 0.65 | 7.27 | 7.43  | 0.852144 | 9   | 2  | 7.964602 | 8.33333333 |
| MS3_09110 | 0.35 | 0.59 | 0.57 | 0.44 | 0.7  | 7.8  | 7.62  | 1.197217 | 29  | 4  | 25.66372 | 16.6666667 |
| MS3_09457 | 0.35 | 0.59 | 0.55 | 0.4  | 0.7  | 7.24 | 7.48  | 0.786628 | 11  | 7  | 9.734513 | 29.1666667 |
| MS3_09619 | 0.35 | 0.59 | 0.57 | 0.45 | 0.69 | 8.08 | 7.8   | 1.32313  | 54  | 9  | 47.78761 | 37.5       |
| MS3_00560 | 0.36 | 0.6  | 0.59 | 0.47 | 0.71 | 6.94 | 7.14  | 0.818731 | 12  | 2  | 10.61947 | 8.33333333 |
| MS3_01313 | 0.36 | 0.6  | 0.54 | 0.43 | 0.65 | 8.53 | 8.67  | 0.869358 | 62  | 17 | 54.86726 | 70.8333333 |
| MS3_03427 | 0.36 | 0.6  | 0.55 | 0.43 | 0.67 | 6.98 | 6.79  | 1.20925  | 10  | 1  | 8.849558 | 4.16666667 |
| MS3_05715 | 0.36 | 0.6  | 0.57 | 0.43 | 0.72 | 7.4  | 7.62  | 0.802519 | 13  | 6  | 11.50442 | 25         |

|           |      |      |      |      |      |      |      |          |    |    |          |            |
|-----------|------|------|------|------|------|------|------|----------|----|----|----------|------------|
| MS3_06704 | 0.36 | 0.6  | 0.57 | 0.44 | 0.7  | 8.06 | 8.22 | 0.852144 | 37 | 11 | 32.74336 | 45.8333333 |
| MS3_09652 | 0.36 | 0.6  | 0.56 | 0.42 | 0.69 | 7.6  | 7.44 | 1.173511 | 10 | 3  | 8.849558 | 12.5       |
| MS3_09793 | 0.36 | 0.6  | 0.57 | 0.42 | 0.71 | 7.81 | 8    | 0.826959 | 31 | 11 | 27.43363 | 45.8333333 |
| MS3_00353 | 0.37 | 0.61 | 0.57 | 0.44 | 0.7  | 8.4  | 8.12 | 1.32313  | 68 | 10 | 60.17699 | 41.6666667 |
| MS3_01261 | 0.37 | 0.61 | 0.56 | 0.45 | 0.67 | 7.67 | 7.41 | 1.29693  | 44 | 7  | 38.93805 | 29.1666667 |
| MS3_01905 | 0.37 | 0.61 | 0.55 | 0.4  | 0.7  | 7.62 | 7.81 | 0.826959 | 16 | 8  | 14.15929 | 33.3333333 |
| MS3_04559 | 0.37 | 0.61 | 0.46 | 0.33 | 0.59 | 7.65 | 7.83 | 0.83527  | 17 | 5  | 15.04425 | 20.8333333 |
| MS3_05836 | 0.37 | 0.61 | 0.54 | 0.41 | 0.68 | 6.74 | 6.92 | 0.83527  | 3  | 2  | 2.654867 | 8.33333333 |
| MS3_06430 | 0.37 | 0.61 | 0.56 | 0.42 | 0.69 | 7.42 | 7.62 | 0.818731 | 15 | 6  | 13.27434 | 25         |
| MS3_07738 | 0.37 | 0.61 | 0.55 | 0.43 | 0.68 | 7.28 | 7.05 | 1.2586   | 19 | 2  | 16.81416 | 8.33333333 |
| MS3_08530 | 0.37 | 0.61 | 0.56 | 0.42 | 0.7  | 7.03 | 7.28 | 0.778801 | 15 | 6  | 13.27434 | 25         |
| MS3_08805 | 0.37 | 0.61 | 0.56 | 0.41 | 0.7  | 7.89 | 8.07 | 0.83527  | 25 | 8  | 22.12389 | 33.3333333 |
| MS3_09271 | 0.37 | 0.61 | 0.51 | 0.41 | 0.61 | 6.59 | 6.45 | 1.150275 | 6  | 0  | 5.309735 | 0          |
| MS3_01658 | 0.38 | 0.62 | 0.57 | 0.45 | 0.69 | 6.48 | 6.66 | 0.83527  | 7  | 1  | 6.19469  | 4.16666667 |
| MS3_04269 | 0.38 | 0.62 | 0.57 | 0.45 | 0.7  | 8.23 | 8.04 | 1.20925  | 55 | 8  | 48.67257 | 33.3333333 |
| MS3_04778 | 0.38 | 0.62 | 0.57 | 0.44 | 0.7  | 7.29 | 7.05 | 1.27125  | 18 | 3  | 15.9292  | 12.5       |
| MS3_05595 | 0.38 | 0.61 | 0.57 | 0.44 | 0.7  | 6.18 | 5.97 | 1.233681 | 1  | 0  | 0.884956 | 0          |
| MS3_06299 | 0.38 | 0.61 | 0.56 | 0.42 | 0.71 | 6.8  | 6.98 | 0.83527  | 4  | 1  | 3.539823 | 4.16666667 |
| MS3_06889 | 0.38 | 0.62 | 0.55 | 0.41 | 0.69 | 7.31 | 7.55 | 0.786628 | 17 | 6  | 15.04425 | 25         |
| MS3_08161 | 0.38 | 0.62 | 0.57 | 0.44 | 0.7  | 7.93 | 7.67 | 1.29693  | 45 | 7  | 39.82301 | 29.1666667 |
| MS3_08498 | 0.38 | 0.62 | 0.56 | 0.43 | 0.7  | 7.87 | 8.05 | 0.83527  | 28 | 8  | 24.77876 | 33.3333333 |
| No hits   | 0.39 | 0.62 | 0.55 | 0.41 | 0.7  | 7.39 | 7.13 | 1.29693  | 20 | 6  | 17.69912 | 25         |
| No hits   | 0.39 | 0.62 | 0.56 | 0.44 | 0.68 | 7.47 | 7.26 | 1.233678 | 26 | 3  | 23.00885 | 12.5       |
| MS3_02653 | 0.39 | 0.62 | 0.55 | 0.43 | 0.67 | 7.26 | 7.11 | 1.161834 | 15 | 1  | 13.27434 | 4.16666667 |
| MS3_02709 | 0.39 | 0.62 | 0.56 | 0.42 | 0.69 | 6.97 | 7.16 | 0.826959 | 7  | 3  | 6.19469  | 12.5       |
| MS3_05326 | 0.39 | 0.62 | 0.58 | 0.44 | 0.72 | 7.37 | 7.18 | 1.20925  | 11 | 4  | 9.734513 | 16.6666667 |
| MS3_05958 | 0.39 | 0.62 | 0.56 | 0.43 | 0.69 | 7.07 | 6.82 | 1.284026 | 22 | 3  | 19.46903 | 12.5       |
| MS3_07420 | 0.39 | 0.62 | 0.55 | 0.43 | 0.67 | 7.05 | 6.9  | 1.161835 | 7  | 1  | 6.19469  | 4.16666667 |
| MS3_07569 | 0.39 | 0.62 | 0.47 | 0.34 | 0.6  | 8.4  | 8.19 | 1.233678 | 50 | 11 | 44.24779 | 45.8333333 |
| MS3_07593 | 0.39 | 0.63 | 0.53 | 0.38 | 0.68 | 8.47 | 8.22 | 1.284025 | 75 | 12 | 66.37168 | 50         |
| MS3_08943 | 0.39 | 0.62 | 0.47 | 0.35 | 0.59 | 7.86 | 7.71 | 1.161834 | 31 | 5  | 27.43363 | 20.8333333 |
| MS3_09735 | 0.39 | 0.62 | 0.55 | 0.43 | 0.66 | 7.14 | 6.9  | 1.27125  | 21 | 1  | 18.58407 | 4.16666667 |
| MS3_10177 | 0.39 | 0.62 | 0.56 | 0.44 | 0.68 | 7.65 | 7.51 | 1.150274 | 18 | 2  | 15.9292  | 8.33333333 |
| MS3_03295 | 0.4  | 0.63 | 0.56 | 0.43 | 0.7  | 7.48 | 7.21 | 1.309965 | 31 | 6  | 27.43363 | 25         |
| MS3_07473 | 0.4  | 0.64 | 0.47 | 0.35 | 0.6  | 9.57 | 9.29 | 1.32313  | 99 | 18 | 87.61062 | 75         |
| MS3_07831 | 0.4  | 0.63 | 0.55 | 0.4  | 0.7  | 7.68 | 7.88 | 0.818731 | 25 | 8  | 22.12389 | 33.3333333 |
| MS3_08999 | 0.4  | 0.63 | 0.56 | 0.43 | 0.7  | 7.99 | 7.84 | 1.161834 | 35 | 8  | 30.97345 | 33.3333333 |

|           |      |      |      |      |      |      |      |          |    |    |          |            |
|-----------|------|------|------|------|------|------|------|----------|----|----|----------|------------|
| MS3_01289 | 0.41 | 0.64 | 0.57 | 0.43 | 0.7  | 7.62 | 7.37 | 1.284026 | 34 | 6  | 30.0885  | 25         |
| MS3_01899 | 0.41 | 0.65 | 0.56 | 0.44 | 0.68 | 7.36 | 7.54 | 0.83527  | 23 | 5  | 20.35398 | 20.8333333 |
| MS3_09778 | 0.41 | 0.64 | 0.56 | 0.43 | 0.68 | 7.38 | 7.54 | 0.852144 | 18 | 3  | 15.9292  | 12.5       |
| MS3_10471 | 0.41 | 0.64 | 0.57 | 0.44 | 0.69 | 7.54 | 7.67 | 0.878095 | 13 | 4  | 11.50442 | 16.6666667 |
| MS3_05754 | 0.42 | 0.66 | 0.54 | 0.4  | 0.67 | 7.06 | 7.23 | 0.843665 | 6  | 3  | 5.309735 | 12.5       |
| MS3_07294 | 0.42 | 0.66 | 0.56 | 0.42 | 0.69 | 7.47 | 7.23 | 1.271249 | 36 | 6  | 31.85841 | 25         |
| MS3_10209 | 0.42 | 0.66 | 0.47 | 0.35 | 0.6  | 7.03 | 7.31 | 0.755783 | 18 | 5  | 15.9292  | 20.8333333 |
| MS3_10493 | 0.42 | 0.65 | 0.55 | 0.42 | 0.69 | 7.51 | 7.74 | 0.794534 | 26 | 8  | 23.00885 | 33.3333333 |
| MS3_10619 | 0.42 | 0.65 | 0.55 | 0.42 | 0.68 | 7.43 | 7.21 | 1.246077 | 22 | 3  | 19.46903 | 12.5       |
| MS3_00048 | 0.43 | 0.66 | 0.51 | 0.38 | 0.64 | 7.91 | 7.75 | 1.173511 | 26 | 6  | 23.00885 | 25         |
| MS3_03193 | 0.43 | 0.66 | 0.56 | 0.43 | 0.68 | 7.79 | 7.64 | 1.161834 | 31 | 4  | 27.43363 | 16.6666667 |
| MS3_05447 | 0.43 | 0.66 | 0.55 | 0.43 | 0.68 | 7.18 | 7.32 | 0.869358 | 6  | 1  | 5.309735 | 4.16666667 |
| MS3_06069 | 0.43 | 0.66 | 0.59 | 0.45 | 0.72 | 8.18 | 8.36 | 0.83527  | 50 | 13 | 44.24779 | 54.1666667 |
| MS3_06400 | 0.43 | 0.66 | 0.55 | 0.42 | 0.68 | 7.54 | 7.34 | 1.221403 | 31 | 7  | 27.43363 | 29.1666667 |
| MS3_07280 | 0.43 | 0.66 | 0.55 | 0.43 | 0.67 | 7.65 | 7.49 | 1.173511 | 30 | 4  | 26.54867 | 16.6666667 |
| MS3_07531 | 0.43 | 0.66 | 0.55 | 0.41 | 0.7  | 7.49 | 7.24 | 1.284026 | 33 | 7  | 29.20354 | 29.1666667 |
| MS3_08808 | 0.43 | 0.66 | 0.56 | 0.42 | 0.7  | 7.28 | 7.03 | 1.284026 | 23 | 4  | 20.35398 | 16.6666667 |
| MS3_10472 | 0.43 | 0.66 | 0.57 | 0.43 | 0.71 | 7.92 | 7.77 | 1.161834 | 26 | 5  | 23.00885 | 20.8333333 |
| MS3_00703 | 0.44 | 0.67 | 0.55 | 0.42 | 0.68 | 7.02 | 7.18 | 0.852144 | 4  | 2  | 3.539823 | 8.33333333 |
| MS3_04100 | 0.44 | 0.67 | 0.55 | 0.42 | 0.67 | 7.2  | 7.36 | 0.852144 | 10 | 3  | 8.849558 | 12.5       |
| MS3_05530 | 0.44 | 0.67 | 0.54 | 0.41 | 0.68 | 6.74 | 6.98 | 0.786627 | 10 | 5  | 8.849558 | 20.8333333 |
| MS3_06482 | 0.44 | 0.67 | 0.55 | 0.42 | 0.68 | 7.92 | 8.17 | 0.778801 | 47 | 13 | 41.59292 | 54.1666667 |
| MS3_06732 | 0.44 | 0.67 | 0.54 | 0.42 | 0.67 | 7.45 | 7.2  | 1.284026 | 31 | 6  | 27.43363 | 25         |
| MS3_06950 | 0.44 | 0.67 | 0.56 | 0.43 | 0.7  | 7.12 | 7.3  | 0.83527  | 8  | 4  | 7.079646 | 16.6666667 |
| MS3_09128 | 0.44 | 0.67 | 0.56 | 0.42 | 0.7  | 7.26 | 7.47 | 0.810584 | 18 | 7  | 15.9292  | 29.1666667 |
| MS3_10510 | 0.44 | 0.67 | 0.56 | 0.44 | 0.68 | 7.77 | 7.55 | 1.246077 | 38 | 7  | 33.62832 | 29.1666667 |
| MS3_02674 | 0.45 | 0.67 | 0.58 | 0.46 | 0.7  | 6.81 | 6.94 | 0.878095 | 8  | 1  | 7.079646 | 4.16666667 |
| MS3_02734 | 0.45 | 0.67 | 0.55 | 0.42 | 0.68 | 7    | 6.79 | 1.233679 | 16 | 3  | 14.15929 | 12.5       |
| MS3_03084 | 0.45 | 0.67 | 0.58 | 0.44 | 0.71 | 8.57 | 8.75 | 0.83527  | 73 | 17 | 64.60177 | 70.8333333 |
| MS3_04887 | 0.45 | 0.68 | 0.47 | 0.33 | 0.6  | 7.22 | 7.39 | 0.843665 | 12 | 3  | 10.61947 | 12.5       |
| MS3_06979 | 0.45 | 0.67 | 0.53 | 0.4  | 0.66 | 6.74 | 6.9  | 0.852143 | 2  | 1  | 1.769912 | 4.16666667 |
| MS3_07370 | 0.45 | 0.67 | 0.55 | 0.42 | 0.68 | 7.4  | 7.25 | 1.161834 | 16 | 3  | 14.15929 | 12.5       |
| MS3_07467 | 0.45 | 0.68 | 0.57 | 0.45 | 0.7  | 7.79 | 7.58 | 1.233678 | 47 | 8  | 41.59292 | 33.3333333 |
| MS3_07637 | 0.45 | 0.67 | 0.56 | 0.42 | 0.7  | 7.22 | 7.38 | 0.852144 | 9  | 4  | 7.964602 | 16.6666667 |
| MS3_08472 | 0.45 | 0.67 | 0.52 | 0.4  | 0.64 | 7.91 | 8.15 | 0.786628 | 50 | 13 | 44.24779 | 54.1666667 |
| MS3_02856 | 0.46 | 0.68 | 0.56 | 0.44 | 0.68 | 7.51 | 7.3  | 1.233678 | 42 | 6  | 37.16814 | 25         |
| MS3_04179 | 0.46 | 0.69 | 0.55 | 0.42 | 0.69 | 8.1  | 8.21 | 0.895834 | 39 | 10 | 34.51327 | 41.6666667 |

|           |      |      |      |      |      |      |      |          |    |    |          |            |
|-----------|------|------|------|------|------|------|------|----------|----|----|----------|------------|
| MS3_05614 | 0.46 | 0.68 | 0.57 | 0.44 | 0.7  | 8.35 | 8.25 | 1.105171 | 57 | 10 | 50.44248 | 41.6666667 |
| MS3_09683 | 0.46 | 0.68 | 0.61 | 0.48 | 0.74 | 7.48 | 7.17 | 1.363425 | 34 | 5  | 30.0885  | 20.8333333 |
| MS3_10492 | 0.46 | 0.68 | 0.55 | 0.41 | 0.68 | 7.79 | 7.6  | 1.20925  | 36 | 7  | 31.85841 | 29.1666667 |
| MS3_05213 | 0.47 | 0.69 | 0.54 | 0.42 | 0.66 | 6.99 | 7.18 | 0.826959 | 14 | 2  | 12.38938 | 8.33333333 |
| MS3_07195 | 0.47 | 0.69 | 0.55 | 0.42 | 0.68 | 7.33 | 7.12 | 1.233678 | 25 | 5  | 22.12389 | 20.8333333 |
| MS3_09406 | 0.47 | 0.69 | 0.56 | 0.44 | 0.69 | 7.76 | 7.63 | 1.138828 | 24 | 4  | 21.23894 | 16.6666667 |
| MS3_10397 | 0.47 | 0.7  | 0.56 | 0.43 | 0.7  | 7.2  | 7.05 | 1.161834 | 10 | 2  | 8.849558 | 8.33333333 |
| MS3_10607 | 0.47 | 0.7  | 0.53 | 0.4  | 0.66 | 6.4  | 6.61 | 0.810583 | 4  | 1  | 3.539823 | 4.16666667 |
| MS3_00676 | 0.48 | 0.7  | 0.53 | 0.38 | 0.69 | 6.51 | 6.72 | 0.810584 | 2  | 5  | 1.769912 | 20.8333333 |
| MS3_02804 | 0.48 | 0.7  | 0.53 | 0.39 | 0.66 | 8.05 | 7.86 | 1.20925  | 46 | 7  | 40.70796 | 29.1666667 |
| MS3_03615 | 0.48 | 0.7  | 0.49 | 0.37 | 0.61 | 6.69 | 6.48 | 1.233679 | 16 | 3  | 14.15929 | 12.5       |
| MS3_04453 | 0.48 | 0.7  | 0.53 | 0.4  | 0.67 | 7.8  | 7.64 | 1.173511 | 29 | 6  | 25.66372 | 25         |
| MS3_05639 | 0.48 | 0.7  | 0.54 | 0.42 | 0.67 | 8.1  | 8.2  | 0.904837 | 40 | 8  | 35.39823 | 33.3333333 |
| MS3_07716 | 0.48 | 0.7  | 0.56 | 0.43 | 0.69 | 7.18 | 7.07 | 1.116278 | 7  | 1  | 6.19469  | 4.16666667 |
| MS3_07795 | 0.48 | 0.7  | 0.54 | 0.41 | 0.67 | 6.62 | 6.85 | 0.794533 | 7  | 1  | 6.19469  | 4.16666667 |
| MS3_08692 | 0.48 | 0.7  | 0.55 | 0.42 | 0.68 | 7.5  | 7.29 | 1.233678 | 27 | 4  | 23.89381 | 16.6666667 |
| MS3_10297 | 0.48 | 0.7  | 0.46 | 0.35 | 0.58 | 7.26 | 7.11 | 1.161834 | 21 | 2  | 18.58407 | 8.33333333 |
| MS3_10753 | 0.48 | 0.7  | 0.55 | 0.42 | 0.67 | 7.46 | 7.26 | 1.221403 | 32 | 6  | 28.31858 | 25         |
| MS3_05252 | 0.49 | 0.71 | 0.63 | 0.52 | 0.75 | 7.79 | 7.57 | 1.246077 | 28 | 2  | 24.77876 | 8.33333333 |
| MS3_06075 | 0.49 | 0.71 | 0.55 | 0.41 | 0.69 | 7.68 | 7.81 | 0.878095 | 17 | 6  | 15.04425 | 25         |
| MS3_08826 | 0.49 | 0.71 | 0.47 | 0.34 | 0.6  | 6.86 | 6.72 | 1.150274 | 10 | 2  | 8.849558 | 8.33333333 |
| MS3_10225 | 0.49 | 0.71 | 0.55 | 0.43 | 0.67 | 8.2  | 8.02 | 1.197217 | 56 | 8  | 49.55752 | 33.3333333 |
| MS3_04311 | 0.5  | 0.71 | 0.55 | 0.42 | 0.68 | 6.75 | 6.58 | 1.185306 | 8  | 2  | 7.079646 | 8.33333333 |
| MS3_08460 | 0.5  | 0.71 | 0.57 | 0.44 | 0.7  | 7.33 | 7.11 | 1.246077 | 27 | 4  | 23.89381 | 16.6666667 |
| MS3_10141 | 0.5  | 0.71 | 0.55 | 0.41 | 0.68 | 7.18 | 7.32 | 0.869358 | 10 | 2  | 8.849558 | 8.33333333 |
| MS3_01001 | 0.5  | 0.71 | 0.47 | 0.34 | 0.6  | 7.52 | 7.39 | 1.138828 | 20 | 1  | 17.69912 | 4.16666667 |
| MS3_02855 | 0.5  | 0.71 | 0.53 | 0.41 | 0.65 | 7.46 | 7.58 | 0.88692  | 15 | 3  | 13.27434 | 12.5       |
| MS3_03405 | 0.5  | 0.71 | 0.57 | 0.43 | 0.71 | 7.65 | 7.78 | 0.878095 | 17 | 5  | 15.04425 | 20.8333333 |
| MS3_05437 | 0.5  | 0.71 | 0.55 | 0.4  | 0.7  | 7.61 | 7.47 | 1.150274 | 12 | 7  | 10.61947 | 29.1666667 |
| MS3_06507 | 0.5  | 0.71 | 0.56 | 0.43 | 0.69 | 7.12 | 6.92 | 1.221403 | 16 | 3  | 14.15929 | 12.5       |
| MS3_07822 | 0.5  | 0.71 | 0.56 | 0.43 | 0.68 | 7.17 | 7.05 | 1.127497 | 10 | 3  | 8.849558 | 12.5       |
| MS3_10943 | 0.5  | 0.71 | 0.58 | 0.46 | 0.71 | 7.31 | 7.45 | 0.869358 | 13 | 2  | 11.50442 | 8.33333333 |
| MS3_11429 | 0.5  | 0.71 | 0.56 | 0.43 | 0.7  | 7.95 | 7.83 | 1.127497 | 30 | 4  | 26.54867 | 16.6666667 |
| MS3_01664 | 0.51 | 0.72 | 0.55 | 0.42 | 0.68 | 7.47 | 7.61 | 0.869358 | 19 | 6  | 16.81416 | 25         |
| MS3_02453 | 0.51 | 0.72 | 0.54 | 0.4  | 0.67 | 6.79 | 6.93 | 0.869358 | 2  | 2  | 1.769912 | 8.33333333 |
| MS3_02474 | 0.51 | 0.72 | 0.53 | 0.41 | 0.66 | 7.87 | 7.78 | 1.094174 | 24 | 5  | 21.23894 | 20.8333333 |
| MS3_04286 | 0.51 | 0.71 | 0.56 | 0.42 | 0.7  | 6.38 | 6.16 | 1.246079 | 6  | 4  | 5.309735 | 16.6666667 |

|           |      |      |      |      |      |      |      |          |    |    |          |            |
|-----------|------|------|------|------|------|------|------|----------|----|----|----------|------------|
| MS3_10249 | 0.51 | 0.72 | 0.56 | 0.43 | 0.69 | 7.93 | 8.06 | 0.878095 | 32 | 11 | 28.31858 | 45.8333333 |
| MS3_10721 | 0.51 | 0.72 | 0.58 | 0.45 | 0.71 | 7.84 | 7.96 | 0.88692  | 24 | 8  | 21.23894 | 33.3333333 |
| MS3_00719 | 0.52 | 0.73 | 0.55 | 0.42 | 0.69 | 7.41 | 7.55 | 0.869358 | 16 | 6  | 14.15929 | 25         |
| MS3_00404 | 0.53 | 0.74 | 0.53 | 0.38 | 0.68 | 7.8  | 7.91 | 0.895834 | 22 | 6  | 19.46903 | 25         |
| MS3_00876 | 0.53 | 0.74 | 0.56 | 0.43 | 0.69 | 7.54 | 7.44 | 1.105171 | 14 | 2  | 12.38938 | 8.33333333 |
| MS3_05157 | 0.53 | 0.74 | 0.52 | 0.39 | 0.65 | 7.33 | 7.2  | 1.138829 | 12 | 3  | 10.61947 | 12.5       |
| MS3_07600 | 0.53 | 0.74 | 0.56 | 0.42 | 0.69 | 7.68 | 7.56 | 1.127497 | 15 | 4  | 13.27434 | 16.6666667 |
| MS3_08737 | 0.53 | 0.74 | 0.54 | 0.41 | 0.66 | 7.79 | 7.94 | 0.860708 | 21 | 6  | 18.58407 | 25         |
| MS3_09305 | 0.53 | 0.74 | 0.53 | 0.38 | 0.67 | 8.03 | 7.92 | 1.116278 | 38 | 9  | 33.62832 | 37.5       |
| MS3_02044 | 0.54 | 0.74 | 0.57 | 0.43 | 0.7  | 7.95 | 8.11 | 0.852144 | 40 | 10 | 35.39823 | 41.6666667 |
| MS3_06022 | 0.54 | 0.74 | 0.57 | 0.46 | 0.68 | 7.48 | 7.59 | 0.895834 | 21 | 4  | 18.58407 | 16.6666667 |
| MS3_08726 | 0.54 | 0.74 | 0.53 | 0.4  | 0.66 | 7.28 | 7.14 | 1.150274 | 13 | 4  | 11.50442 | 16.6666667 |
| MS3_09970 | 0.54 | 0.74 | 0.58 | 0.46 | 0.7  | 7.28 | 7.42 | 0.869358 | 19 | 3  | 16.81416 | 12.5       |
| MS3_10998 | 0.54 | 0.75 | 0.55 | 0.41 | 0.69 | 7.24 | 7.46 | 0.802519 | 22 | 8  | 19.46903 | 33.3333333 |
| MS3_11432 | 0.54 | 0.75 | 0.53 | 0.4  | 0.67 | 7.07 | 7.25 | 0.83527  | 19 | 5  | 16.81416 | 20.8333333 |
| MS3_07465 | 0.55 | 0.75 | 0.52 | 0.38 | 0.66 | 7.6  | 7.48 | 1.127497 | 18 | 5  | 15.9292  | 20.8333333 |
| MS3_10188 | 0.55 | 0.76 | 0.61 | 0.49 | 0.72 | 6.89 | 7.01 | 0.88692  | 13 | 0  | 11.50442 | 0          |
| MS3_02685 | 0.56 | 0.76 | 0.56 | 0.43 | 0.68 | 8.27 | 8.1  | 1.185305 | 64 | 11 | 56.63717 | 45.8333333 |
| MS3_03192 | 0.56 | 0.76 | 0.48 | 0.34 | 0.62 | 7.28 | 7.42 | 0.869358 | 13 | 5  | 11.50442 | 20.8333333 |
| MS3_03417 | 0.56 | 0.77 | 0.55 | 0.43 | 0.66 | 8.19 | 8.28 | 0.913931 | 48 | 13 | 42.47788 | 54.1666667 |
| MS3_06468 | 0.56 | 0.77 | 0.54 | 0.41 | 0.66 | 7.08 | 6.98 | 1.105171 | 7  | 1  | 6.19469  | 4.16666667 |
| MS3_06677 | 0.56 | 0.77 | 0.54 | 0.41 | 0.67 | 7.42 | 7.53 | 0.895834 | 16 | 5  | 14.15929 | 20.8333333 |
| MS3_08159 | 0.56 | 0.76 | 0.52 | 0.39 | 0.65 | 7.34 | 7.49 | 0.860708 | 17 | 5  | 15.04425 | 20.8333333 |
| MS3_05011 | 0.57 | 0.77 | 0.55 | 0.41 | 0.69 | 7.58 | 7.4  | 1.197217 | 33 | 6  | 29.20354 | 25         |
| MS3_05126 | 0.57 | 0.77 | 0.56 | 0.43 | 0.68 | 7.78 | 7.61 | 1.185305 | 24 | 4  | 21.23894 | 16.6666667 |
| MS3_10085 | 0.57 | 0.77 | 0.55 | 0.42 | 0.68 | 7.36 | 7.54 | 0.83527  | 24 | 8  | 21.23894 | 33.3333333 |
| MS3_00449 | 0.58 | 0.78 | 0.52 | 0.4  | 0.65 | 7.44 | 7.57 | 0.878095 | 23 | 5  | 20.35398 | 20.8333333 |
| MS3_00625 | 0.58 | 0.78 | 0.56 | 0.43 | 0.7  | 6.71 | 6.82 | 0.895834 | 5  | 2  | 4.424779 | 8.33333333 |
| MS3_05646 | 0.58 | 0.78 | 0.48 | 0.34 | 0.61 | 7.05 | 7.16 | 0.895834 | 6  | 2  | 5.309735 | 8.33333333 |
| MS3_05748 | 0.58 | 0.78 | 0.52 | 0.39 | 0.66 | 7.91 | 8    | 0.913931 | 22 | 8  | 19.46903 | 33.3333333 |
| MS3_07606 | 0.58 | 0.78 | 0.49 | 0.37 | 0.61 | 7.84 | 7.99 | 0.860708 | 44 | 10 | 38.93805 | 41.6666667 |
| MS3_08157 | 0.58 | 0.78 | 0.56 | 0.42 | 0.7  | 7.76 | 7.87 | 0.895834 | 18 | 7  | 15.9292  | 29.1666667 |
| MS3_08276 | 0.58 | 0.78 | 0.54 | 0.41 | 0.67 | 7.61 | 7.46 | 1.161834 | 36 | 7  | 31.85841 | 29.1666667 |
| MS3_11247 | 0.58 | 0.78 | 0.55 | 0.41 | 0.69 | 7.75 | 7.64 | 1.116278 | 22 | 5  | 19.46903 | 20.8333333 |
| MS3_03171 | 0.59 | 0.78 | 0.54 | 0.41 | 0.67 | 7.68 | 7.57 | 1.116278 | 19 | 4  | 16.81416 | 16.6666667 |
| MS3_05026 | 0.59 | 0.79 | 0.54 | 0.4  | 0.68 | 7.78 | 7.61 | 1.185305 | 40 | 7  | 35.39823 | 29.1666667 |
| MS3_06668 | 0.59 | 0.78 | 0.56 | 0.44 | 0.67 | 8.14 | 8.05 | 1.094174 | 52 | 8  | 46.0177  | 33.3333333 |

|           |      |      |      |      |      |      |      |          |    |    |          |            |
|-----------|------|------|------|------|------|------|------|----------|----|----|----------|------------|
| MS3_08925 | 0.59 | 0.79 | 0.54 | 0.41 | 0.66 | 7.13 | 6.98 | 1.161835 | 19 | 4  | 16.81416 | 16.6666667 |
| MS3_10423 | 0.59 | 0.78 | 0.56 | 0.42 | 0.7  | 8.39 | 8.51 | 0.88692  | 52 | 17 | 46.0177  | 70.8333333 |
| MS3_11273 | 0.59 | 0.79 | 0.55 | 0.41 | 0.69 | 7.81 | 7.7  | 1.116278 | 29 | 6  | 25.66372 | 25         |
| MS3_02237 | 0.6  | 0.79 | 0.51 | 0.38 | 0.64 | 7.68 | 7.58 | 1.105171 | 25 | 3  | 22.12389 | 12.5       |
| MS3_02396 | 0.6  | 0.79 | 0.53 | 0.39 | 0.68 | 7.72 | 7.82 | 0.904837 | 17 | 6  | 15.04425 | 25         |
| MS3_03655 | 0.6  | 0.79 | 0.55 | 0.41 | 0.69 | 7.61 | 7.74 | 0.878095 | 24 | 8  | 21.23894 | 33.3333333 |
| MS3_04386 | 0.6  | 0.79 | 0.55 | 0.41 | 0.68 | 7.53 | 7.64 | 0.895834 | 17 | 7  | 15.04425 | 29.1666667 |
| MS3_04680 | 0.6  | 0.79 | 0.53 | 0.4  | 0.66 | 7.9  | 7.77 | 1.138828 | 40 | 9  | 35.39823 | 37.5       |
| MS3_08008 | 0.6  | 0.79 | 0.46 | 0.31 | 0.61 | 7.24 | 7.08 | 1.173511 | 22 | 3  | 19.46903 | 12.5       |
| MS3_09780 | 0.6  | 0.79 | 0.52 | 0.39 | 0.66 | 7.1  | 7.24 | 0.869358 | 16 | 6  | 14.15929 | 25         |
| MS3_11250 | 0.6  | 0.79 | 0.54 | 0.41 | 0.67 | 7.3  | 7.13 | 1.185305 | 29 | 6  | 25.66372 | 25         |
| MS3_01643 | 0.61 | 0.8  | 0.49 | 0.37 | 0.62 | 7.97 | 7.88 | 1.094174 | 30 | 5  | 26.54867 | 20.8333333 |
| MS3_02944 | 0.61 | 0.8  | 0.49 | 0.35 | 0.62 | 8.02 | 7.93 | 1.094174 | 33 | 7  | 29.20354 | 29.1666667 |
| MS3_04275 | 0.61 | 0.79 | 0.54 | 0.4  | 0.68 | 7.71 | 7.6  | 1.116278 | 22 | 5  | 19.46903 | 20.8333333 |
| MS3_05352 | 0.61 | 0.8  | 0.52 | 0.4  | 0.63 | 8.27 | 8.36 | 0.913931 | 55 | 15 | 48.67257 | 62.5       |
| MS3_07590 | 0.61 | 0.8  | 0.55 | 0.42 | 0.68 | 7.36 | 7.21 | 1.161834 | 24 | 5  | 21.23894 | 20.8333333 |
| MS3_09296 | 0.61 | 0.8  | 0.49 | 0.35 | 0.63 | 7.91 | 7.77 | 1.150274 | 34 | 8  | 30.0885  | 33.3333333 |
| MS3_01096 | 0.62 | 0.8  | 0.52 | 0.39 | 0.66 | 7.53 | 7.44 | 1.094174 | 14 | 4  | 12.38938 | 16.6666667 |
| MS3_02359 | 0.62 | 0.8  | 0.5  | 0.37 | 0.62 | 7.07 | 6.98 | 1.094174 | 7  | 0  | 6.19469  | 0          |
| MS3_02952 | 0.62 | 0.8  | 0.53 | 0.39 | 0.67 | 6.83 | 6.92 | 0.913931 | 4  | 1  | 3.539823 | 4.1666667  |
| MS3_05555 | 0.62 | 0.8  | 0.52 | 0.39 | 0.64 | 6.5  | 6.4  | 1.105171 | 3  | 0  | 2.654867 | 0          |
| MS3_05896 | 0.62 | 0.8  | 0.53 | 0.4  | 0.66 | 7.48 | 7.56 | 0.923116 | 16 | 4  | 14.15929 | 16.6666667 |
| MS3_07304 | 0.62 | 0.8  | 0.54 | 0.39 | 0.68 | 7.52 | 7.63 | 0.895834 | 18 | 8  | 15.9292  | 33.3333333 |
| MS3_11239 | 0.62 | 0.8  | 0.48 | 0.35 | 0.61 | 7.03 | 6.95 | 1.083287 | 2  | 0  | 1.769912 | 0          |
| MS3_03443 | 0.63 | 0.81 | 0.52 | 0.38 | 0.66 | 7.96 | 7.85 | 1.116278 | 43 | 9  | 38.0531  | 37.5       |
| MS3_04781 | 0.63 | 0.81 | 0.53 | 0.4  | 0.66 | 7.91 | 7.82 | 1.094174 | 32 | 6  | 28.31858 | 25         |
| MS3_06834 | 0.63 | 0.81 | 0.53 | 0.41 | 0.66 | 6.25 | 6.36 | 0.895833 | 4  | 0  | 3.539823 | 0          |
| MS3_08366 | 0.63 | 0.81 | 0.53 | 0.42 | 0.64 | 7.38 | 7.28 | 1.105171 | 22 | 2  | 19.46903 | 8.3333333  |
| MS3_08444 | 0.63 | 0.81 | 0.53 | 0.39 | 0.67 | 8    | 7.91 | 1.094174 | 29 | 7  | 25.66372 | 29.1666667 |
| MS3_08593 | 0.63 | 0.81 | 0.54 | 0.41 | 0.67 | 6.69 | 6.56 | 1.138829 | 10 | 3  | 8.849558 | 12.5       |
| MS3_02086 | 0.64 | 0.81 | 0.53 | 0.4  | 0.67 | 7.87 | 7.72 | 1.161834 | 50 | 10 | 44.24779 | 41.6666667 |
| MS3_03079 | 0.64 | 0.81 | 0.53 | 0.39 | 0.66 | 7.81 | 7.66 | 1.161834 | 42 | 9  | 37.16814 | 37.5       |
| MS3_05016 | 0.64 | 0.81 | 0.53 | 0.38 | 0.67 | 7.87 | 7.97 | 0.904837 | 31 | 10 | 27.43363 | 41.6666667 |
| MS3_06798 | 0.64 | 0.81 | 0.45 | 0.34 | 0.57 | 7.01 | 7.11 | 0.904837 | 9  | 3  | 7.964602 | 12.5       |
| MS3_10898 | 0.64 | 0.81 | 0.54 | 0.4  | 0.67 | 8.06 | 7.91 | 1.161834 | 49 | 9  | 43.36283 | 37.5       |
| MS3_01983 | 0.65 | 0.82 | 0.51 | 0.39 | 0.64 | 8.36 | 8.43 | 0.932394 | 57 | 14 | 50.44248 | 58.3333333 |
| MS3_02001 | 0.65 | 0.82 | 0.54 | 0.42 | 0.67 | 7.15 | 7.02 | 1.138829 | 22 | 3  | 19.46903 | 12.5       |



|           |      |      |      |      |      |      |      |          |    |    |          |            |
|-----------|------|------|------|------|------|------|------|----------|----|----|----------|------------|
| MS3_03511 | 0.65 | 0.82 | 0.52 | 0.37 | 0.66 | 7.31 | 7.41 | 0.904837 | 8  | 3  | 7.079646 | 12.5       |
| MS3_06746 | 0.65 | 0.82 | 0.55 | 0.45 | 0.66 | 7.43 | 7.32 | 1.116278 | 37 | 3  | 32.74336 | 12.5       |
| MS3_10022 | 0.65 | 0.82 | 0.53 | 0.39 | 0.68 | 7.15 | 7.24 | 0.913931 | 7  | 1  | 6.19469  | 4.16666667 |
| MS3_11161 | 0.65 | 0.83 | 0.47 | 0.34 | 0.6  | 7.16 | 7.07 | 1.094174 | 8  | 2  | 7.079646 | 8.33333333 |
| MS3_01775 | 0.66 | 0.83 | 0.53 | 0.41 | 0.66 | 7.27 | 7.36 | 0.913931 | 14 | 2  | 12.38938 | 8.33333333 |
| MS3_04717 | 0.66 | 0.83 | 0.52 | 0.41 | 0.64 | 6.99 | 6.92 | 1.072508 | 8  | 1  | 7.079646 | 4.16666667 |
| MS3_05170 | 0.66 | 0.83 | 0.52 | 0.38 | 0.65 | 7.74 | 7.62 | 1.127497 | 33 | 8  | 29.20354 | 33.3333333 |
| MS3_06789 | 0.66 | 0.83 | 0.52 | 0.39 | 0.65 | 7.81 | 7.74 | 1.072508 | 29 | 7  | 25.66372 | 29.1666667 |
| MS3_08019 | 0.66 | 0.83 | 0.55 | 0.41 | 0.69 | 7.39 | 7.25 | 1.150274 | 26 | 5  | 23.00885 | 20.8333333 |
| MS3_04642 | 0.67 | 0.84 | 0.49 | 0.36 | 0.62 | 7.09 | 7.21 | 0.88692  | 21 | 5  | 18.58407 | 20.8333333 |
| MS3_07002 | 0.67 | 0.84 | 0.54 | 0.41 | 0.67 | 7.82 | 7.9  | 0.923116 | 23 | 7  | 20.35398 | 29.1666667 |
| MS3_11045 | 0.67 | 0.84 | 0.52 | 0.4  | 0.65 | 6.45 | 6.33 | 1.127498 | 8  | 1  | 7.079646 | 4.16666667 |
| MS3_01353 | 0.68 | 0.85 | 0.51 | 0.36 | 0.65 | 7.57 | 7.66 | 0.913931 | 13 | 5  | 11.50442 | 20.8333333 |
| MS3_01922 | 0.68 | 0.85 | 0.53 | 0.39 | 0.66 | 7.17 | 7.06 | 1.116278 | 18 | 3  | 15.9292  | 12.5       |
| MS3_04276 | 0.68 | 0.85 | 0.54 | 0.4  | 0.67 | 7.4  | 7.32 | 1.083287 | 9  | 4  | 7.964602 | 16.6666667 |
| MS3_06403 | 0.68 | 0.85 | 0.46 | 0.34 | 0.58 | 6.6  | 6.69 | 0.913931 | 5  | 1  | 4.424779 | 4.16666667 |
| MS3_07045 | 0.68 | 0.85 | 0.51 | 0.39 | 0.62 | 7.46 | 7.38 | 1.083287 | 17 | 3  | 15.04425 | 12.5       |
| MS3_10935 | 0.68 | 0.85 | 0.5  | 0.36 | 0.65 | 7.31 | 7.42 | 0.895834 | 9  | 4  | 7.964602 | 16.6666667 |
| MS3_01627 | 0.69 | 0.85 | 0.47 | 0.33 | 0.6  | 7.42 | 7.31 | 1.116278 | 25 | 4  | 22.12389 | 16.6666667 |
| MS3_06669 | 0.69 | 0.85 | 0.53 | 0.39 | 0.68 | 7.63 | 7.5  | 1.138828 | 35 | 9  | 30.97345 | 37.5       |
| MS3_07345 | 0.69 | 0.85 | 0.53 | 0.4  | 0.65 | 7.15 | 7.04 | 1.116278 | 17 | 3  | 15.04425 | 12.5       |
| MS3_09240 | 0.69 | 0.85 | 0.55 | 0.41 | 0.69 | 7.83 | 7.9  | 0.932394 | 26 | 8  | 23.00885 | 33.3333333 |
| MS3_10288 | 0.69 | 0.85 | 0.49 | 0.36 | 0.62 | 8.11 | 8.18 | 0.932394 | 50 | 10 | 44.24779 | 41.6666667 |
| MS3_00076 | 0.7  | 0.85 | 0.53 | 0.39 | 0.67 | 7.65 | 7.72 | 0.932394 | 13 | 5  | 11.50442 | 20.8333333 |
| MS3_01558 | 0.7  | 0.86 | 0.54 | 0.41 | 0.68 | 6.95 | 7.02 | 0.932394 | 7  | 0  | 6.19469  | 0          |
| MS3_02476 | 0.7  | 0.86 | 0.53 | 0.39 | 0.67 | 7.46 | 7.39 | 1.072508 | 12 | 4  | 10.61947 | 16.6666667 |
| MS3_05999 | 0.7  | 0.85 | 0.53 | 0.39 | 0.68 | 7.53 | 7.4  | 1.138828 | 34 | 9  | 30.0885  | 37.5       |
| MS3_08937 | 0.7  | 0.86 | 0.48 | 0.35 | 0.61 | 7.55 | 7.43 | 1.127497 | 37 | 7  | 32.74336 | 29.1666667 |
| MS3_09826 | 0.7  | 0.86 | 0.53 | 0.39 | 0.67 | 8.09 | 8.17 | 0.923116 | 50 | 11 | 44.24779 | 45.8333333 |
| MS3_01693 | 0.71 | 0.86 | 0.56 | 0.43 | 0.69 | 7.02 | 6.9  | 1.127497 | 14 | 2  | 12.38938 | 8.33333333 |
| MS3_02027 | 0.71 | 0.87 | 0.53 | 0.39 | 0.66 | 7.2  | 7.09 | 1.116278 | 24 | 5  | 21.23894 | 20.8333333 |
| MS3_03231 | 0.71 | 0.87 | 0.49 | 0.35 | 0.62 | 7.3  | 7.23 | 1.072508 | 9  | 2  | 7.964602 | 8.33333333 |
| MS3_07374 | 0.71 | 0.87 | 0.53 | 0.41 | 0.65 | 7.16 | 7.07 | 1.094174 | 25 | 4  | 22.12389 | 16.6666667 |
| MS3_02048 | 0.72 | 0.87 | 0.52 | 0.39 | 0.64 | 7.26 | 7.18 | 1.083287 | 11 | 2  | 9.734513 | 8.33333333 |
| MS3_05360 | 0.72 | 0.87 | 0.49 | 0.36 | 0.61 | 7.32 | 7.37 | 0.951229 | 9  | 2  | 7.964602 | 8.33333333 |
| MS3_06347 | 0.72 | 0.87 | 0.56 | 0.42 | 0.71 | 7.73 | 7.66 | 1.072508 | 18 | 5  | 15.9292  | 20.8333333 |
| MS3_08178 | 0.72 | 0.87 | 0.51 | 0.36 | 0.66 | 7.31 | 7.38 | 0.932394 | 9  | 3  | 7.964602 | 12.5       |

|           |      |      |      |      |      |      |      |          |    |    |          |            |
|-----------|------|------|------|------|------|------|------|----------|----|----|----------|------------|
| MS3_09274 | 0.72 | 0.87 | 0.48 | 0.36 | 0.61 | 7.02 | 7.11 | 0.913931 | 13 | 4  | 11.50442 | 16.6666667 |
| MS3_10028 | 0.72 | 0.87 | 0.53 | 0.41 | 0.65 | 7.52 | 7.45 | 1.072508 | 23 | 4  | 20.35398 | 16.6666667 |
| MS3_00450 | 0.73 | 0.88 | 0.48 | 0.34 | 0.63 | 7.76 | 7.82 | 0.941765 | 19 | 7  | 16.81416 | 29.1666667 |
| MS3_03130 | 0.73 | 0.88 | 0.55 | 0.42 | 0.68 | 7.17 | 7.23 | 0.941764 | 7  | 0  | 6.19469  | 0          |
| MS3_03558 | 0.73 | 0.88 | 0.54 | 0.4  | 0.68 | 7.53 | 7.6  | 0.932394 | 15 | 4  | 13.27434 | 16.6666667 |
| MS3_07156 | 0.73 | 0.88 | 0.53 | 0.4  | 0.65 | 6.76 | 6.82 | 0.941764 | 5  | 1  | 4.424779 | 4.16666667 |
| MS3_07509 | 0.73 | 0.88 | 0.55 | 0.4  | 0.7  | 8.01 | 8.09 | 0.923116 | 36 | 11 | 31.85841 | 45.8333333 |
| MS3_08607 | 0.73 | 0.88 | 0.53 | 0.41 | 0.65 | 7.77 | 7.82 | 0.951229 | 26 | 5  | 23.00885 | 20.8333333 |
| MS3_08871 | 0.73 | 0.88 | 0.5  | 0.38 | 0.63 | 7.99 | 8.05 | 0.941765 | 41 | 7  | 36.28319 | 29.1666667 |
| MS3_00405 | 0.74 | 0.88 | 0.53 | 0.41 | 0.64 | 7.59 | 7.54 | 1.051271 | 23 | 2  | 20.35398 | 8.33333333 |
| MS3_01053 | 0.74 | 0.88 | 0.47 | 0.33 | 0.61 | 6.87 | 6.8  | 1.072508 | 6  | 2  | 5.309735 | 8.33333333 |
| MS3_01240 | 0.74 | 0.88 | 0.52 | 0.39 | 0.64 | 7.48 | 7.54 | 0.941765 | 21 | 5  | 18.58407 | 20.8333333 |
| MS3_01435 | 0.74 | 0.88 | 0.55 | 0.43 | 0.67 | 7.87 | 7.8  | 1.072508 | 40 | 6  | 35.39823 | 25         |
| MS3_02050 | 0.74 | 0.88 | 0.48 | 0.35 | 0.61 | 8.12 | 8.06 | 1.061837 | 45 | 11 | 39.82301 | 45.8333333 |
| MS3_04342 | 0.74 | 0.88 | 0.53 | 0.41 | 0.66 | 7.69 | 7.59 | 1.105171 | 40 | 5  | 35.39823 | 20.8333333 |
| MS3_08776 | 0.74 | 0.88 | 0.55 | 0.41 | 0.69 | 7.9  | 7.84 | 1.061837 | 26 | 7  | 23.00885 | 29.1666667 |
| MS3_08823 | 0.74 | 0.88 | 0.51 | 0.37 | 0.64 | 7.49 | 7.42 | 1.072508 | 12 | 3  | 10.61947 | 12.5       |
| MS3_00004 | 0.75 | 0.88 | 0.55 | 0.4  | 0.7  | 7.75 | 7.82 | 0.932394 | 21 | 8  | 18.58407 | 33.3333333 |
| MS3_00047 | 0.75 | 0.88 | 0.53 | 0.41 | 0.65 | 7.74 | 7.65 | 1.094174 | 46 | 9  | 40.70796 | 37.5       |
| MS3_00862 | 0.75 | 0.88 | 0.51 | 0.39 | 0.63 | 7.14 | 7.23 | 0.913931 | 23 | 3  | 20.35398 | 12.5       |
| MS3_02787 | 0.75 | 0.88 | 0.53 | 0.42 | 0.65 | 8    | 7.93 | 1.072508 | 34 | 9  | 30.0885  | 37.5       |
| MS3_03226 | 0.75 | 0.88 | 0.49 | 0.36 | 0.62 | 7.68 | 7.74 | 0.941765 | 24 | 5  | 21.23894 | 20.8333333 |
| MS3_04617 | 0.75 | 0.88 | 0.5  | 0.38 | 0.62 | 6.41 | 6.35 | 1.061837 | 5  | 0  | 4.424779 | 0          |
| MS3_08953 | 0.75 | 0.88 | 0.54 | 0.42 | 0.65 | 7.51 | 7.57 | 0.941765 | 18 | 3  | 15.9292  | 12.5       |
| MS3_10221 | 0.75 | 0.88 | 0.53 | 0.4  | 0.66 | 7.67 | 7.6  | 1.072508 | 24 | 4  | 21.23894 | 16.6666667 |
| MS3_03424 | 0.76 | 0.89 | 0.58 | 0.45 | 0.7  | 7.57 | 7.62 | 0.951229 | 18 | 2  | 15.9292  | 8.33333333 |
| MS3_03938 | 0.76 | 0.89 | 0.53 | 0.41 | 0.65 | 6.76 | 6.81 | 0.951229 | 5  | 0  | 4.424779 | 0          |
| MS3_04582 | 0.76 | 0.89 | 0.53 | 0.41 | 0.65 | 8.22 | 8.18 | 1.040811 | 48 | 9  | 42.47788 | 37.5       |
| MS3_08926 | 0.76 | 0.89 | 0.53 | 0.4  | 0.66 | 7.52 | 7.42 | 1.105171 | 33 | 6  | 29.20354 | 25         |
| MS3_00183 | 0.77 | 0.89 | 0.53 | 0.4  | 0.66 | 8.13 | 8.04 | 1.094174 | 61 | 11 | 53.9823  | 45.8333333 |
| MS3_02407 | 0.77 | 0.89 | 0.53 | 0.4  | 0.66 | 7.32 | 7.23 | 1.094174 | 24 | 5  | 21.23894 | 20.8333333 |
| MS3_03814 | 0.77 | 0.89 | 0.54 | 0.4  | 0.67 | 7.57 | 7.48 | 1.094174 | 39 | 8  | 34.51327 | 33.3333333 |
| MS3_05034 | 0.77 | 0.89 | 0.51 | 0.37 | 0.65 | 7.27 | 7.19 | 1.083287 | 17 | 6  | 15.04425 | 25         |
| MS3_06368 | 0.77 | 0.89 | 0.49 | 0.36 | 0.62 | 6.62 | 6.7  | 0.923116 | 8  | 2  | 7.079646 | 8.33333333 |
| MS3_08717 | 0.77 | 0.89 | 0.53 | 0.4  | 0.67 | 8.3  | 8.24 | 1.061837 | 57 | 10 | 50.44248 | 41.6666667 |
| MS3_11077 | 0.77 | 0.89 | 0.5  | 0.38 | 0.63 | 7.14 | 7.19 | 0.951229 | 4  | 2  | 3.539823 | 8.33333333 |
| MS3_00066 | 0.78 | 0.89 | 0.54 | 0.39 | 0.68 | 7.74 | 7.81 | 0.932394 | 23 | 8  | 20.35398 | 33.3333333 |

|           |      |      |      |      |      |      |      |          |    |    |          |            |
|-----------|------|------|------|------|------|------|------|----------|----|----|----------|------------|
| MS3_01422 | 0.78 | 0.89 | 0.57 | 0.46 | 0.67 | 7.27 | 7.19 | 1.083287 | 22 | 3  | 19.46903 | 12.5       |
| MS3_01902 | 0.78 | 0.89 | 0.55 | 0.42 | 0.68 | 7.68 | 7.74 | 0.941765 | 17 | 5  | 15.04425 | 20.8333333 |
| MS3_03047 | 0.78 | 0.89 | 0.48 | 0.34 | 0.62 | 7.33 | 7.25 | 1.083287 | 25 | 5  | 22.12389 | 20.8333333 |
| MS3_03301 | 0.78 | 0.89 | 0.53 | 0.38 | 0.67 | 7.15 | 7.07 | 1.083287 | 16 | 7  | 14.15929 | 29.1666667 |
| MS3_06125 | 0.78 | 0.89 | 0.49 | 0.36 | 0.61 | 7.61 | 7.55 | 1.061837 | 28 | 7  | 24.77876 | 29.1666667 |
| MS3_06296 | 0.78 | 0.89 | 0.53 | 0.39 | 0.66 | 7.66 | 7.57 | 1.094174 | 32 | 8  | 28.31858 | 33.3333333 |
| MS3_07363 | 0.78 | 0.89 | 0.48 | 0.34 | 0.62 | 6.99 | 7.08 | 0.913931 | 12 | 5  | 10.61947 | 20.8333333 |
| MS3_07686 | 0.78 | 0.89 | 0.53 | 0.39 | 0.66 | 8.03 | 7.95 | 1.083287 | 55 | 11 | 48.67257 | 45.8333333 |
| MS3_09546 | 0.78 | 0.89 | 0.51 | 0.37 | 0.64 | 8.1  | 8.05 | 1.051271 | 38 | 9  | 33.62832 | 37.5       |
| MS3_10421 | 0.78 | 0.89 | 0.53 | 0.4  | 0.65 | 8.52 | 8.57 | 0.951229 | 70 | 18 | 61.9469  | 75         |
| MS3_03662 | 0.79 | 0.9  | 0.52 | 0.39 | 0.66 | 7.57 | 7.62 | 0.951229 | 17 | 5  | 15.04425 | 20.8333333 |
| MS3_08158 | 0.79 | 0.9  | 0.52 | 0.39 | 0.65 | 7.93 | 7.97 | 0.960789 | 29 | 6  | 25.66372 | 25         |
| MS3_09879 | 0.79 | 0.9  | 0.52 | 0.38 | 0.65 | 7.01 | 6.96 | 1.051271 | 4  | 0  | 3.539823 | 0          |
| MS3_06149 | 0.8  | 0.9  | 0.51 | 0.38 | 0.64 | 7.92 | 8    | 0.923116 | 47 | 12 | 41.59292 | 50         |
| MS3_00504 | 0.8  | 0.9  | 0.52 | 0.38 | 0.67 | 7.87 | 7.81 | 1.061837 | 25 | 9  | 22.12389 | 37.5       |
| MS3_03937 | 0.8  | 0.9  | 0.49 | 0.37 | 0.61 | 6.83 | 6.9  | 0.932394 | 14 | 2  | 12.38938 | 8.3333333  |
| MS3_06424 | 0.8  | 0.91 | 0.53 | 0.4  | 0.66 | 8.27 | 8.22 | 1.051271 | 54 | 10 | 47.78761 | 41.6666667 |
| MS3_09613 | 0.8  | 0.91 | 0.49 | 0.37 | 0.61 | 8.48 | 8.52 | 0.960789 | 64 | 11 | 56.63717 | 45.8333333 |
| MS3_04178 | 0.81 | 0.92 | 0.49 | 0.35 | 0.63 | 6.24 | 6.3  | 0.941764 | 3  | 1  | 2.654867 | 4.1666667  |
| MS3_04267 | 0.81 | 0.92 | 0.51 | 0.39 | 0.63 | 7.11 | 7.18 | 0.932394 | 22 | 3  | 19.46903 | 12.5       |
| MS3_07126 | 0.81 | 0.91 | 0.52 | 0.4  | 0.64 | 7.43 | 7.47 | 0.960789 | 16 | 2  | 14.15929 | 8.3333333  |
| MS3_08210 | 0.81 | 0.91 | 0.55 | 0.4  | 0.69 | 7.43 | 7.37 | 1.061837 | 15 | 5  | 13.27434 | 20.8333333 |
| MS3_08337 | 0.81 | 0.91 | 0.49 | 0.36 | 0.62 | 7.14 | 7.19 | 0.951229 | 7  | 3  | 6.19469  | 12.5       |
| MS3_10687 | 0.81 | 0.91 | 0.53 | 0.39 | 0.67 | 8.02 | 7.98 | 1.040811 | 32 | 8  | 28.31858 | 33.3333333 |
| MS3_01104 | 0.82 | 0.92 | 0.53 | 0.4  | 0.67 | 7.38 | 7.31 | 1.072508 | 28 | 6  | 24.77876 | 25         |
| MS3_02307 | 0.82 | 0.92 | 0.53 | 0.39 | 0.66 | 7.44 | 7.37 | 1.072508 | 32 | 6  | 28.31858 | 25         |
| MS3_02425 | 0.82 | 0.92 | 0.52 | 0.38 | 0.66 | 7.52 | 7.45 | 1.072508 | 31 | 9  | 27.43363 | 37.5       |
| MS3_08839 | 0.82 | 0.92 | 0.52 | 0.4  | 0.65 | 7.81 | 7.85 | 0.960789 | 26 | 7  | 23.00885 | 29.1666667 |
| MS3_10475 | 0.82 | 0.92 | 0.53 | 0.4  | 0.67 | 7.69 | 7.73 | 0.960789 | 23 | 6  | 20.35398 | 25         |
| MS3_01262 | 0.83 | 0.92 | 0.5  | 0.37 | 0.64 | 7.54 | 7.5  | 1.040811 | 23 | 5  | 20.35398 | 20.8333333 |
| MS3_06947 | 0.83 | 0.92 | 0.5  | 0.35 | 0.65 | 7.81 | 7.85 | 0.960789 | 25 | 8  | 22.12389 | 33.3333333 |
| MS3_07892 | 0.83 | 0.92 | 0.52 | 0.4  | 0.65 | 6.52 | 6.48 | 1.040811 | 5  | 0  | 4.424779 | 0          |
| MS3_08160 | 0.83 | 0.92 | 0.52 | 0.38 | 0.65 | 7.59 | 7.52 | 1.072508 | 28 | 7  | 24.77876 | 29.1666667 |
| MS3_08450 | 0.83 | 0.92 | 0.5  | 0.37 | 0.63 | 7.27 | 7.33 | 0.941764 | 20 | 6  | 17.69912 | 25         |
| MS3_08727 | 0.83 | 0.92 | 0.53 | 0.42 | 0.65 | 6.96 | 6.99 | 0.970445 | 3  | 0  | 2.654867 | 0          |
| MS3_09682 | 0.83 | 0.92 | 0.54 | 0.42 | 0.67 | 8.21 | 8.15 | 1.061837 | 60 | 11 | 53.09735 | 45.8333333 |
| MS3_10138 | 0.83 | 0.92 | 0.49 | 0.36 | 0.61 | 8.55 | 8.51 | 1.040811 | 62 | 15 | 54.86726 | 62.5       |

|           |      |      |      |      |      |      |      |          |    |    |          |            |
|-----------|------|------|------|------|------|------|------|----------|----|----|----------|------------|
| MS3_10572 | 0.83 | 0.92 | 0.53 | 0.38 | 0.68 | 6.99 | 6.93 | 1.061837 | 11 | 6  | 9.734513 | 25         |
| MS3_00147 | 0.84 | 0.92 | 0.51 | 0.36 | 0.65 | 7.45 | 7.4  | 1.051271 | 16 | 4  | 14.15929 | 16.6666667 |
| MS3_00881 | 0.84 | 0.92 | 0.51 | 0.39 | 0.63 | 6.91 | 6.86 | 1.051271 | 14 | 1  | 12.38938 | 4.16666667 |
| MS3_01764 | 0.84 | 0.92 | 0.51 | 0.4  | 0.62 | 7.73 | 7.68 | 1.051271 | 44 | 8  | 38.93805 | 33.3333333 |
| MS3_02747 | 0.84 | 0.92 | 0.53 | 0.39 | 0.67 | 6.69 | 6.62 | 1.072508 | 12 | 3  | 10.61947 | 12.5       |
| MS3_04646 | 0.84 | 0.92 | 0.52 | 0.41 | 0.64 | 8.41 | 8.45 | 0.960789 | 54 | 14 | 47.78761 | 58.3333333 |
| MS3_06009 | 0.84 | 0.92 | 0.53 | 0.4  | 0.66 | 6.91 | 6.96 | 0.951229 | 12 | 1  | 10.61947 | 4.16666667 |
| MS3_07299 | 0.84 | 0.92 | 0.5  | 0.39 | 0.6  | 7.57 | 7.6  | 0.970446 | 21 | 1  | 18.58407 | 4.16666667 |
| MS3_07464 | 0.84 | 0.92 | 0.53 | 0.4  | 0.65 | 6.92 | 6.87 | 1.051271 | 14 | 3  | 12.38938 | 12.5       |
| MS3_00604 | 0.85 | 0.92 | 0.53 | 0.4  | 0.66 | 7.66 | 7.61 | 1.051271 | 33 | 6  | 29.20354 | 25         |
| MS3_02954 | 0.85 | 0.92 | 0.5  | 0.36 | 0.64 | 7.46 | 7.5  | 0.960789 | 10 | 5  | 8.849558 | 20.8333333 |
| MS3_03853 | 0.85 | 0.92 | 0.53 | 0.39 | 0.67 | 6.48 | 6.51 | 0.970445 | 2  | 0  | 1.769912 | 0          |
| MS3_04817 | 0.85 | 0.92 | 0.53 | 0.39 | 0.67 | 7.48 | 7.51 | 0.970446 | 13 | 4  | 11.50442 | 16.6666667 |
| MS3_07406 | 0.85 | 0.92 | 0.53 | 0.4  | 0.66 | 6.42 | 6.46 | 0.960789 | 5  | 1  | 4.424779 | 4.16666667 |
| MS3_08929 | 0.85 | 0.93 | 0.48 | 0.35 | 0.62 | 7.49 | 7.52 | 0.970446 | 16 | 5  | 14.15929 | 20.8333333 |
| MS3_08945 | 0.85 | 0.92 | 0.53 | 0.4  | 0.65 | 7.25 | 7.2  | 1.051271 | 28 | 3  | 24.77876 | 12.5       |
| MS3_10816 | 0.85 | 0.92 | 0.49 | 0.35 | 0.63 | 7.37 | 7.31 | 1.061837 | 18 | 6  | 15.9292  | 25         |
| MS3_01276 | 0.86 | 0.93 | 0.52 | 0.38 | 0.66 | 7.41 | 7.38 | 1.030455 | 13 | 4  | 11.50442 | 16.6666667 |
| MS3_03420 | 0.86 | 0.93 | 0.53 | 0.41 | 0.64 | 7.97 | 8    | 0.970446 | 39 | 9  | 34.51327 | 37.5       |
| MS3_07799 | 0.86 | 0.93 | 0.49 | 0.36 | 0.62 | 7.89 | 7.92 | 0.970446 | 28 | 7  | 24.77876 | 29.1666667 |
| MS3_08176 | 0.86 | 0.93 | 0.48 | 0.35 | 0.62 | 7.64 | 7.61 | 1.030455 | 12 | 3  | 10.61947 | 12.5       |
| MS3_09691 | 0.86 | 0.93 | 0.5  | 0.37 | 0.63 | 8.55 | 8.5  | 1.051271 | 72 | 15 | 63.71681 | 62.5       |
| MS3_01653 | 0.87 | 0.93 | 0.51 | 0.38 | 0.64 | 7.58 | 7.54 | 1.040811 | 26 | 7  | 23.00885 | 29.1666667 |
| MS3_02275 | 0.87 | 0.93 | 0.53 | 0.4  | 0.66 | 7.29 | 7.24 | 1.051271 | 24 | 4  | 21.23894 | 16.6666667 |
| MS3_02752 | 0.87 | 0.93 | 0.52 | 0.39 | 0.66 | 7.21 | 7.16 | 1.051271 | 24 | 6  | 21.23894 | 25         |
| MS3_02951 | 0.87 | 0.93 | 0.52 | 0.39 | 0.65 | 9.1  | 9.07 | 1.030455 | 87 | 17 | 76.99115 | 70.8333333 |
| MS3_03419 | 0.87 | 0.93 | 0.53 | 0.39 | 0.67 | 8.5  | 8.46 | 1.040811 | 71 | 12 | 62.83186 | 50         |
| MS3_03979 | 0.87 | 0.94 | 0.48 | 0.36 | 0.61 | 7.17 | 7.2  | 0.970446 | 7  | 0  | 6.19469  | 0          |
| MS3_08105 | 0.87 | 0.93 | 0.5  | 0.36 | 0.64 | 6.8  | 6.84 | 0.960789 | 11 | 3  | 9.734513 | 12.5       |
| MS3_00494 | 0.88 | 0.94 | 0.52 | 0.38 | 0.66 | 6.46 | 6.42 | 1.040811 | 5  | 2  | 4.424779 | 8.33333333 |
| MS3_02088 | 0.88 | 0.94 | 0.49 | 0.36 | 0.62 | 7.46 | 7.48 | 0.980199 | 12 | 3  | 10.61947 | 12.5       |
| MS3_03385 | 0.88 | 0.94 | 0.53 | 0.42 | 0.63 | 7.45 | 7.47 | 0.980199 | 16 | 1  | 14.15929 | 4.16666667 |
| MS3_03918 | 0.88 | 0.94 | 0.48 | 0.35 | 0.62 | 7.55 | 7.52 | 1.030455 | 17 | 4  | 15.04425 | 16.6666667 |
| MS3_03976 | 0.88 | 0.94 | 0.49 | 0.36 | 0.62 | 7.91 | 7.87 | 1.040811 | 38 | 11 | 33.62832 | 45.8333333 |
| MS3_09634 | 0.88 | 0.94 | 0.51 | 0.36 | 0.66 | 8.09 | 8.05 | 1.040811 | 37 | 10 | 32.74336 | 41.6666667 |
| MS3_09698 | 0.88 | 0.94 | 0.52 | 0.39 | 0.66 | 7.24 | 7.22 | 1.020201 | 7  | 3  | 6.19469  | 12.5       |
| MS3_00610 | 0.89 | 0.94 | 0.52 | 0.4  | 0.65 | 7.5  | 7.54 | 0.960789 | 28 | 6  | 24.77876 | 25         |

|           |      |      |      |      |      |      |      |          |    |    |          |            |
|-----------|------|------|------|------|------|------|------|----------|----|----|----------|------------|
| MS3_04206 | 0.89 | 0.95 | 0.5  | 0.39 | 0.62 | 7.77 | 7.75 | 1.020201 | 25 | 6  | 22.12389 | 25         |
| MS3_04584 | 0.89 | 0.94 | 0.5  | 0.36 | 0.63 | 9.15 | 9.11 | 1.040811 | 93 | 19 | 82.30088 | 79.1666667 |
| MS3_09865 | 0.89 | 0.94 | 0.49 | 0.36 | 0.63 | 8.53 | 8.57 | 0.960789 | 59 | 14 | 52.21239 | 58.3333333 |
| MS3_04266 | 0.9  | 0.95 | 0.52 | 0.37 | 0.67 | 8.05 | 8.07 | 0.980199 | 34 | 10 | 30.0885  | 41.6666667 |
| MS3_07816 | 0.9  | 0.95 | 0.51 | 0.38 | 0.64 | 7.3  | 7.27 | 1.030455 | 25 | 6  | 22.12389 | 25         |
| MS3_10252 | 0.9  | 0.95 | 0.52 | 0.39 | 0.65 | 7.43 | 7.46 | 0.970446 | 23 | 6  | 20.35398 | 25         |
| MS3_03406 | 0.91 | 0.95 | 0.49 | 0.37 | 0.61 | 7.47 | 7.44 | 1.030455 | 22 | 2  | 19.46903 | 8.33333333 |
| MS3_03513 | 0.91 | 0.95 | 0.49 | 0.37 | 0.61 | 6.29 | 6.27 | 1.020201 | 5  | 0  | 4.424779 | 0          |
| MS3_04225 | 0.91 | 0.95 | 0.49 | 0.36 | 0.62 | 7.26 | 7.29 | 0.970446 | 24 | 7  | 21.23894 | 29.1666667 |
| MS3_07587 | 0.91 | 0.95 | 0.5  | 0.37 | 0.62 | 8.92 | 8.95 | 0.970446 | 87 | 20 | 76.99115 | 83.3333333 |
| MS3_01636 | 0.92 | 0.96 | 0.5  | 0.36 | 0.63 | 7.48 | 7.5  | 0.980199 | 16 | 5  | 14.15929 | 20.8333333 |
| MS3_02465 | 0.92 | 0.96 | 0.5  | 0.37 | 0.63 | 6.73 | 6.7  | 1.030455 | 5  | 2  | 4.424779 | 8.33333333 |
| MS3_03800 | 0.92 | 0.96 | 0.57 | 0.45 | 0.69 | 7.16 | 7.11 | 1.051271 | 25 | 2  | 22.12389 | 8.33333333 |
| MS3_03802 | 0.92 | 0.96 | 0.54 | 0.38 | 0.69 | 6.7  | 6.67 | 1.030455 | 8  | 3  | 7.079646 | 12.5       |
| MS3_03977 | 0.92 | 0.96 | 0.5  | 0.37 | 0.63 | 7.44 | 7.47 | 0.970446 | 33 | 7  | 29.20354 | 29.1666667 |
| MS3_04474 | 0.92 | 0.96 | 0.5  | 0.36 | 0.64 | 7.84 | 7.82 | 1.020201 | 32 | 6  | 28.31858 | 25         |
| MS3_07372 | 0.92 | 0.96 | 0.51 | 0.38 | 0.65 | 7.31 | 7.36 | 0.951229 | 28 | 7  | 24.77876 | 29.1666667 |
| MS3_07823 | 0.92 | 0.96 | 0.54 | 0.42 | 0.66 | 7.72 | 7.7  | 1.020201 | 26 | 5  | 23.00885 | 20.8333333 |
| MS3_01095 | 0.93 | 0.96 | 0.5  | 0.38 | 0.61 | 7.47 | 7.45 | 1.020201 | 25 | 2  | 22.12389 | 8.33333333 |
| MS3_05332 | 0.93 | 0.97 | 0.5  | 0.37 | 0.62 | 8.01 | 7.99 | 1.020201 | 44 | 7  | 38.93805 | 29.1666667 |
| MS3_05911 | 0.93 | 0.96 | 0.51 | 0.38 | 0.64 | 7.11 | 7.09 | 1.020201 | 18 | 5  | 15.9292  | 20.8333333 |
| MS3_00665 | 0.94 | 0.97 | 0.5  | 0.37 | 0.63 | 7.28 | 7.26 | 1.020201 | 14 | 2  | 12.38938 | 8.33333333 |
| MS3_02141 | 0.94 | 0.97 | 0.51 | 0.36 | 0.66 | 8.02 | 8.04 | 0.980199 | 31 | 8  | 27.43363 | 33.3333333 |
| MS3_02368 | 0.94 | 0.97 | 0.49 | 0.36 | 0.63 | 7.31 | 7.29 | 1.020201 | 10 | 4  | 8.849558 | 16.6666667 |
| MS3_02690 | 0.94 | 0.97 | 0.59 | 0.48 | 0.69 | 6.98 | 6.96 | 1.020201 | 16 | 1  | 14.15929 | 4.16666667 |
| MS3_04449 | 0.94 | 0.97 | 0.54 | 0.42 | 0.65 | 7.71 | 7.7  | 1.01005  | 48 | 5  | 42.47788 | 20.8333333 |
| MS3_00287 | 0.95 | 0.97 | 0.51 | 0.38 | 0.65 | 7.55 | 7.54 | 1.01005  | 21 | 6  | 18.58407 | 25         |
| MS3_00413 | 0.95 | 0.98 | 0.52 | 0.39 | 0.65 | 7.22 | 7.23 | 0.99005  | 13 | 3  | 11.50442 | 12.5       |
| MS3_03618 | 0.95 | 0.97 | 0.53 | 0.38 | 0.68 | 6.27 | 6.29 | 0.980199 | 3  | 1  | 2.654867 | 4.16666667 |
| MS3_06538 | 0.95 | 0.97 | 0.51 | 0.39 | 0.63 | 8.09 | 8.08 | 1.01005  | 44 | 9  | 38.93805 | 37.5       |
| MS3_06807 | 0.96 | 0.98 | 0.54 | 0.42 | 0.66 | 7.27 | 7.28 | 0.99005  | 17 | 1  | 15.04425 | 4.16666667 |
| MS3_07651 | 0.96 | 0.99 | 0.51 | 0.38 | 0.64 | 7.17 | 7.16 | 1.01005  | 13 | 3  | 11.50442 | 12.5       |
| MS3_09076 | 0.96 | 0.98 | 0.53 | 0.4  | 0.65 | 7.12 | 7.13 | 0.99005  | 10 | 2  | 8.849558 | 8.33333333 |
| MS3_01445 | 0.97 | 0.99 | 0.54 | 0.43 | 0.64 | 6.87 | 6.87 | 1        | 13 | 1  | 11.50442 | 4.16666667 |
| MS3_05077 | 0.97 | 0.99 | 0.54 | 0.41 | 0.66 | 8.3  | 8.29 | 1.01005  | 47 | 15 | 41.59292 | 62.5       |
| MS3_06729 | 0.97 | 0.99 | 0.49 | 0.38 | 0.6  | 7.63 | 7.64 | 0.99005  | 27 | 2  | 23.89381 | 8.33333333 |
| MS3_07010 | 0.97 | 0.99 | 0.5  | 0.37 | 0.64 | 7.74 | 7.75 | 0.99005  | 39 | 7  | 34.51327 | 29.1666667 |

|           |      |      |      |      |      |      |      |         |    |    |          |            |
|-----------|------|------|------|------|------|------|------|---------|----|----|----------|------------|
| MS3_08415 | 0.97 | 0.99 | 0.5  | 0.39 | 0.61 | 7.61 | 7.61 | 1       | 23 | 3  | 20.35398 | 12.5       |
| MS3_09371 | 0.97 | 0.99 | 0.51 | 0.36 | 0.65 | 7.53 | 7.54 | 0.99005 | 17 | 5  | 15.04425 | 20.8333333 |
| MS3_09434 | 0.97 | 0.99 | 0.52 | 0.38 | 0.66 | 7.5  | 7.49 | 1.01005 | 25 | 7  | 22.12389 | 29.1666667 |
| MS3_07231 | 0.98 | 0.99 | 0.52 | 0.39 | 0.65 | 7.48 | 7.48 | 1       | 27 | 6  | 23.89381 | 25         |
| MS3_08723 | 0.98 | 0.99 | 0.5  | 0.38 | 0.62 | 7.43 | 7.43 | 1       | 15 | 2  | 13.27434 | 8.33333333 |
| MS3_00187 | 0.99 | 1    | 0.51 | 0.37 | 0.65 | 7.61 | 7.61 | 1       | 16 | 4  | 14.15929 | 16.6666667 |
| MS3_01160 | 0.99 | 1    | 0.51 | 0.37 | 0.65 | 7.55 | 7.55 | 1       | 23 | 5  | 20.35398 | 20.8333333 |
| MS3_01274 | 0.99 | 1    | 0.51 | 0.38 | 0.65 | 7.85 | 7.85 | 1       | 35 | 8  | 30.97345 | 33.3333333 |
| MS3_03101 | 0.99 | 1    | 0.48 | 0.36 | 0.6  | 7.57 | 7.58 | 0.99005 | 34 | 4  | 30.0885  | 16.6666667 |
| MS3_05226 | 0.99 | 1    | 0.53 | 0.41 | 0.65 | 7.84 | 7.84 | 1       | 26 | 4  | 23.00885 | 16.6666667 |
| MS3_05953 | 0.99 | 1    | 0.5  | 0.37 | 0.63 | 8.17 | 8.17 | 1       | 38 | 9  | 33.62832 | 37.5       |
| MS3_04499 | 1    | 1    | 0.51 | 0.38 | 0.63 | 7.46 | 7.46 | 1       | 23 | 2  | 20.35398 | 8.33333333 |
| MS3_05837 | 1    | 1    | 0.49 | 0.37 | 0.6  | 8.4  | 8.4  | 1       | 65 | 17 | 57.52212 | 70.8333333 |
| MS3_09124 | 1    | 1    | 0.48 | 0.35 | 0.6  | 6.78 | 6.79 | 0.99005 | 5  | 2  | 4.424779 | 8.33333333 |
| MS3_10193 | 1    | 1    | 0.5  | 0.37 | 0.63 | 7.2  | 7.2  | 1       | 5  | 1  | 4.424779 | 4.16666667 |
| MS3_10345 | 1    | 1    | 0.49 | 0.36 | 0.62 | 8.14 | 8.14 | 1       | 59 | 13 | 52.21239 | 54.1666667 |

\*WormBase ParaSite online database, version 14 [https://parasite.wormbase.org/Schistosoma\\_haematobium\\_prjna78265/Info/Index/](https://parasite.wormbase.org/Schistosoma_haematobium_prjna78265/Info/Index/)

**Figure S1: Schematic of PoC-ICT design.** The conjugate pad (orange) was coated with 10 OD of gold-conjugated mouse anti-human IgG (to capture any human IgG present in the applied serum), 1.0 mg/ml of recombinant antigen (*Sh-TSP-2* in this example) was sprayed at the test line (to capture any anti-*Sh-TSP-2* human IgG/anti-human IgG gold-conjugate complex) and 1.0 mg/ml anti-mouse IgG was sprayed at the control line (to capture anti-human IgG gold-conjugate and serve as an internal validation). For each strip, a band at the test and control lines was considered a positive result, a band at the control line only was considered a negative result and a test was considered invalid if there was no band at the control line.

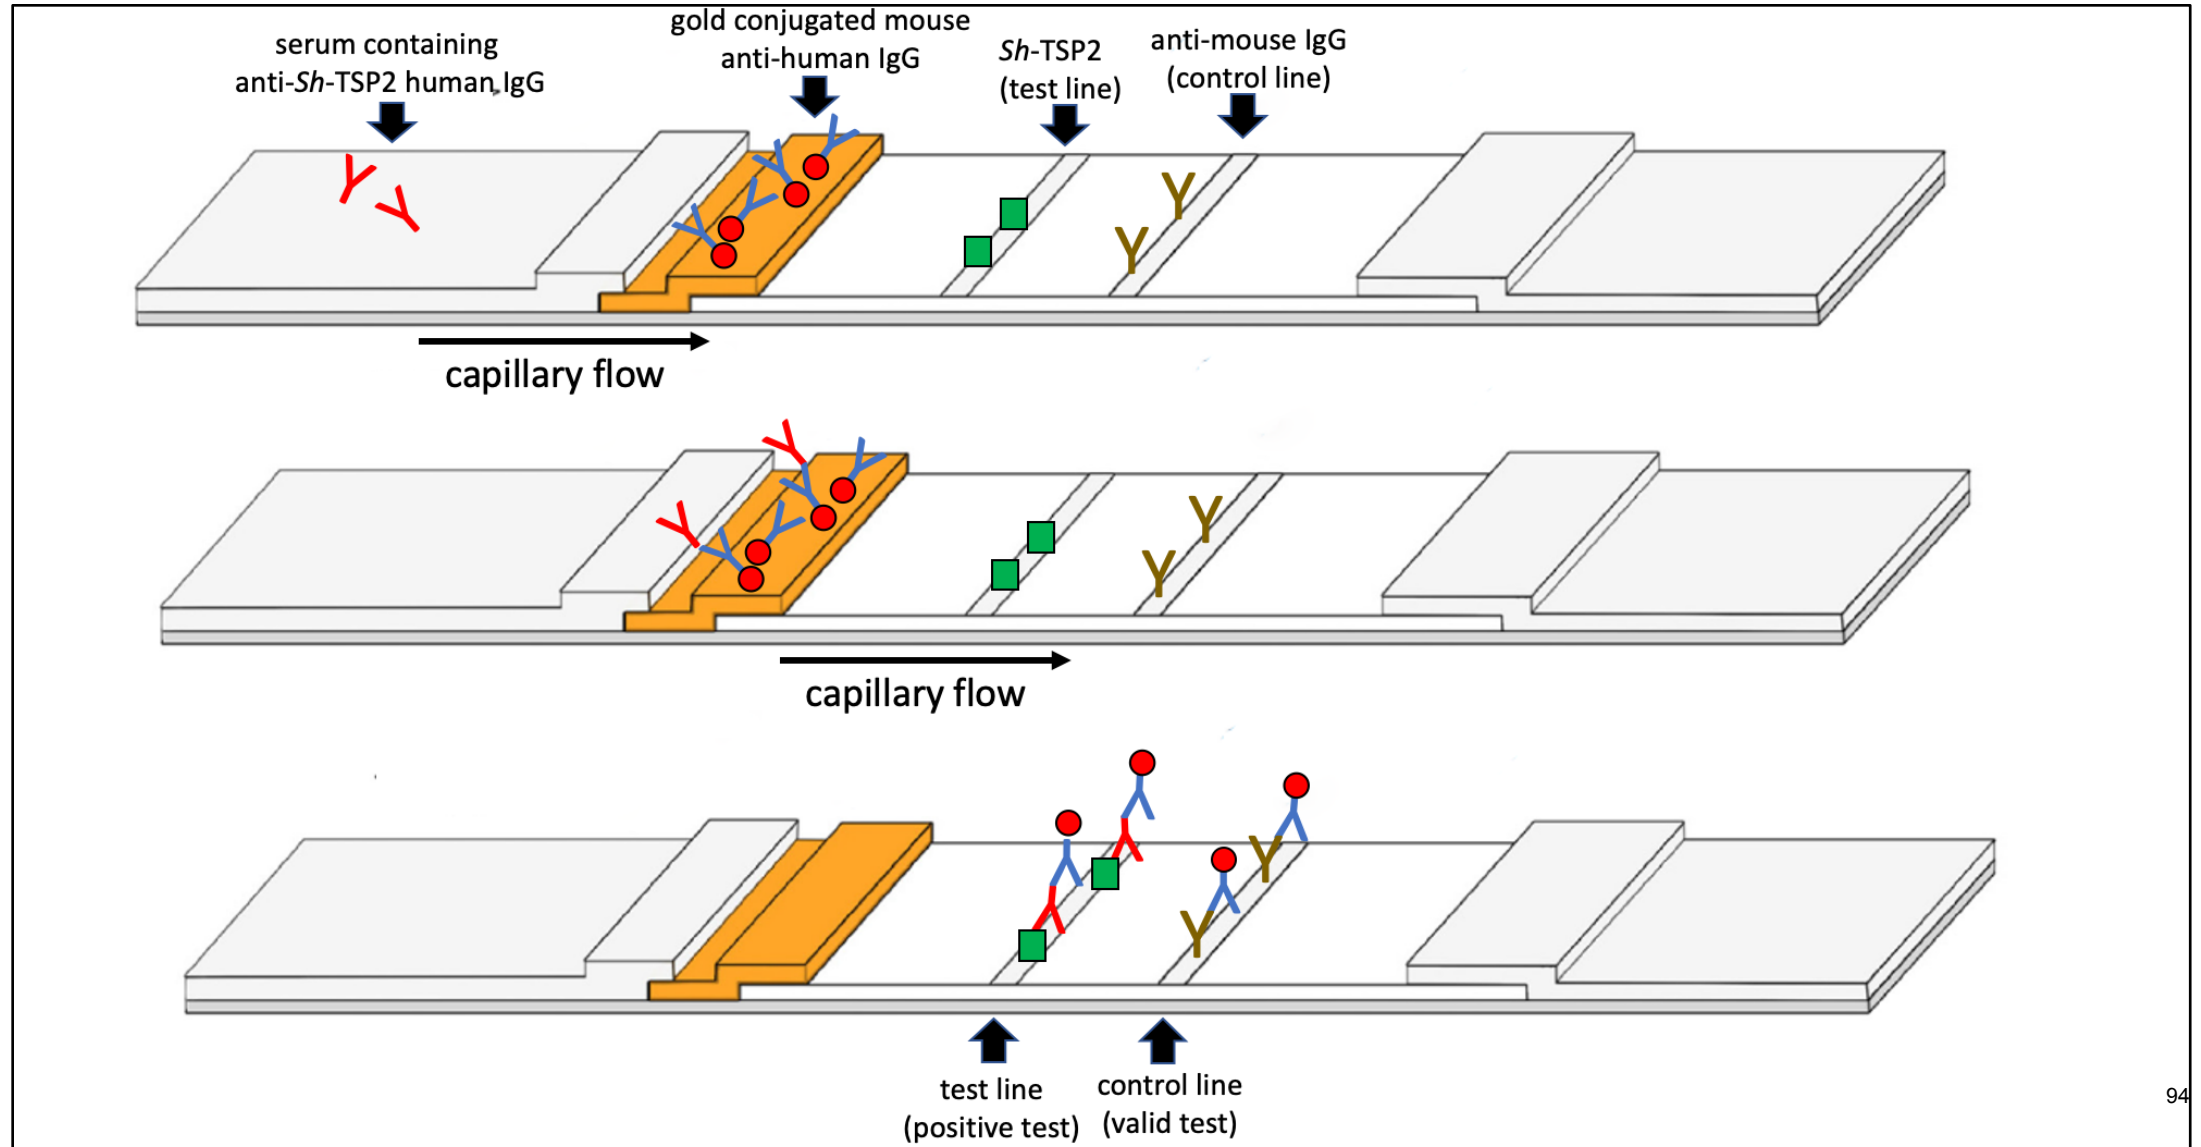

Figure S2. Scatterplot showing correlation of *S. haematobium* infection intensity (urine egg burden) with individual mean SI of all spots resulting from probing of *S. haematobium* protein arrays with different diagnostic fluids. (A) Serum. (B) Urine.

(A)

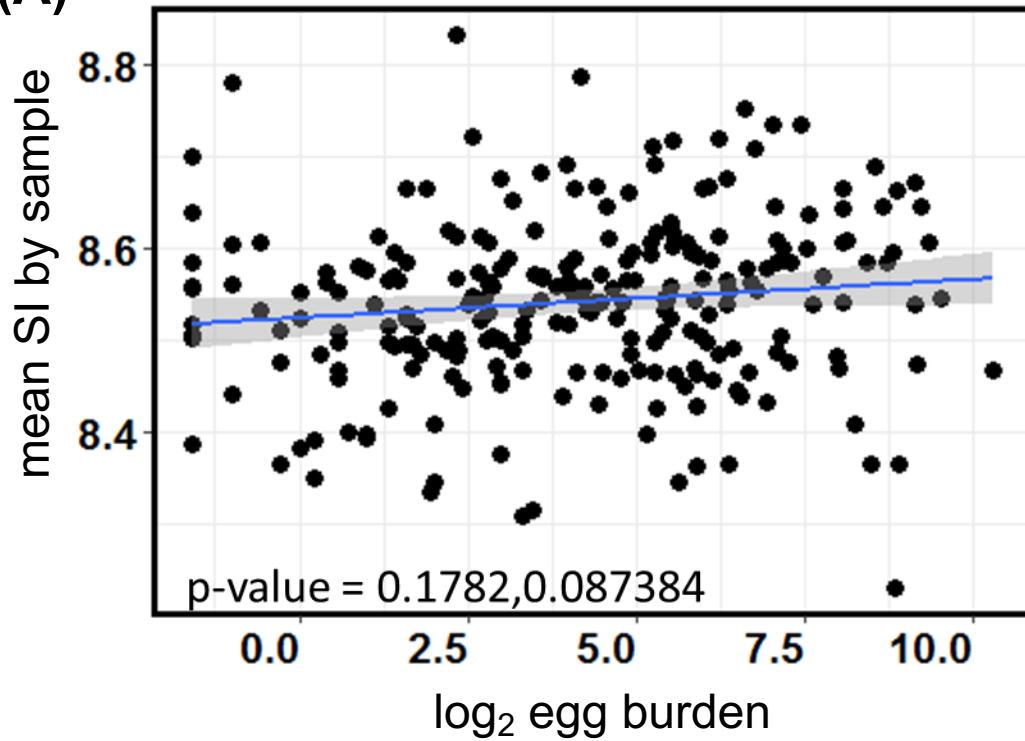

(B)

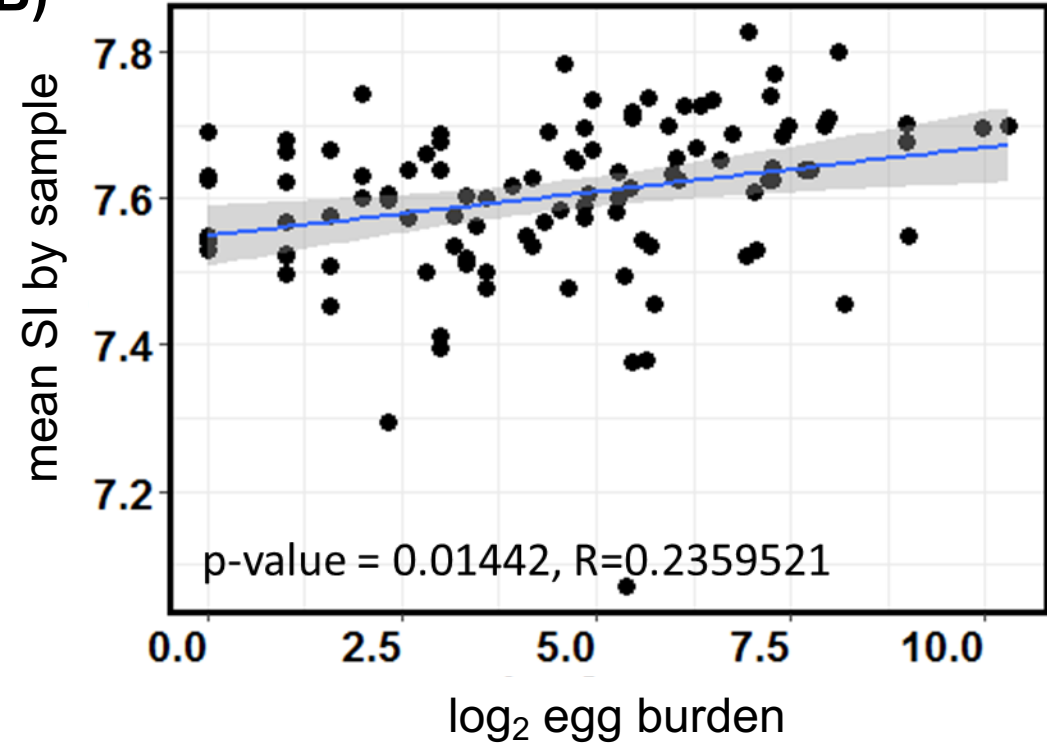



Figure S3. Receiver operating characteristic curve showing diagnostic performance (area under the curve - AUC) of the minimal antibody signature in each diagnostic fluid. (A) Serum. (B) Urine.

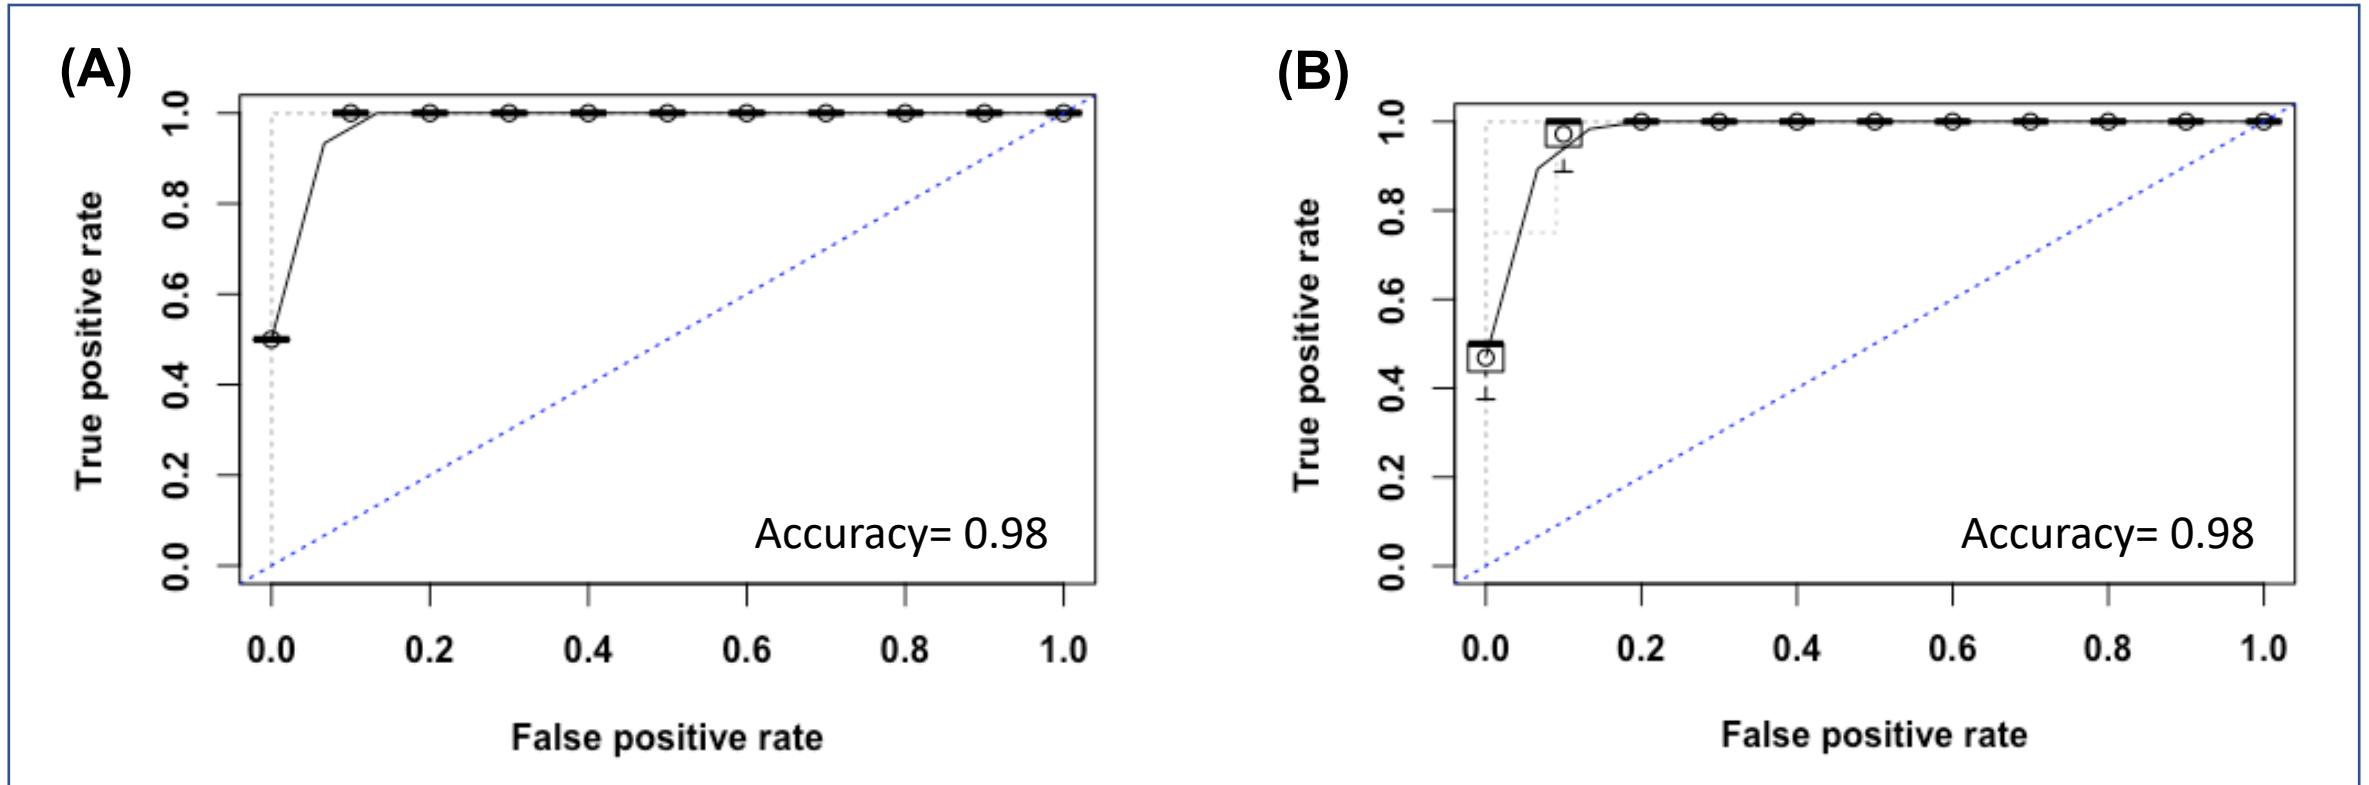

Figure S4. (A) Amino acid alignment of *S. haematobium* TSPs and (B) percent identity matrix showing level of identity between *S. haematobium* TSPs .

(A)

```

Sh-TSP2      1  EKPKVKKHVTDALREFVKEYSHDEHVSQVLDDEVQOKLQCCGADSSKDYVTPP---PESCF
MS3_01370    1  -RDEVKSQFLSLVKSSVNEYSKNPDKFNFLDKIQQEFQCCGSESSSDYTSSGQTVPDSCK
MS3_09198    1  -KDRIDSEIDALMTGAL--DKPTPEITEFMDLIQSSFHCCGAKGPQDYGP---NIPASCR

Sh-TSP2      58  --KDGQIFKEGCVKQVSDLSKMH
MS3_01370    60  DTKTKAIYSDGCSYKVISFFFK-
MS3_09198    55  --GETTVYHEGCVPVFGAFLKR-
    
```

(B)

|                 | <i>Sh</i> -TSP2 | MS3_01370 | MS3_09198 |
|-----------------|-----------------|-----------|-----------|
| <i>Sh</i> -TSP2 | 100             | 35        | 24        |
| MS3_01370       | 35              | 100       | 29        |
| MS3_09198       | 24              | 29        | 100       |

**Figure S5. Antibody responses to combinations of cell-based recombinant versions of top-ranked proteins generated by ELISA with human urine from *S. haematobium*-endemic populations.** (A) anti-MS3\_10385 + anti-MS3\_10186 + anti-MS3\_09198 IgG response. (B) anti-MS3\_10385 + anti-MS3\_09198 + anti-MS3\_01370 + anti-*Sh*-TSP-2 IgG response. (C) anti-MS3\_09198 + anti-MS3\_01370 + anti *Sh*-TSP-2 IgG response. (D) anti-MS3\_01370 IgG response + anti-*Sh*-TSP-2 IgG response. Egg-positive subjects were characterized (WHO stratification) as either having a high ( $\geq 50$  eggs per 10 ml urine) or low (1-49 eggs per 10 ml urine) infection. “egg -ve/CAA +ve” = egg negative subjects who are classified as positive (infected) by the more sensitive circulating anodic antigen (CAA) detection test. “egg -ve/CAA -ve” = egg negative subjects who are confirmed as antigen negative by the CAA detection test. “non-end. -ve” = subjects from a non-endemic area. Plotted data represent the responses of both the Zimbabwe (black symbols) and Zanzibar (red symbols) cohorts. Reactivity cutoffs were determined as the average plus 3SD of the values of the non-endemic negative group (red dotted line). Significance of responses between each infected group and the non-infected group were analysed by Student’s *t* test \* $p \leq 0.05$ , \*\* $p \leq 0.01$ , \*\*\* $p \leq 0.001$ , \*\*\*\* $p \leq 0.0001$ .

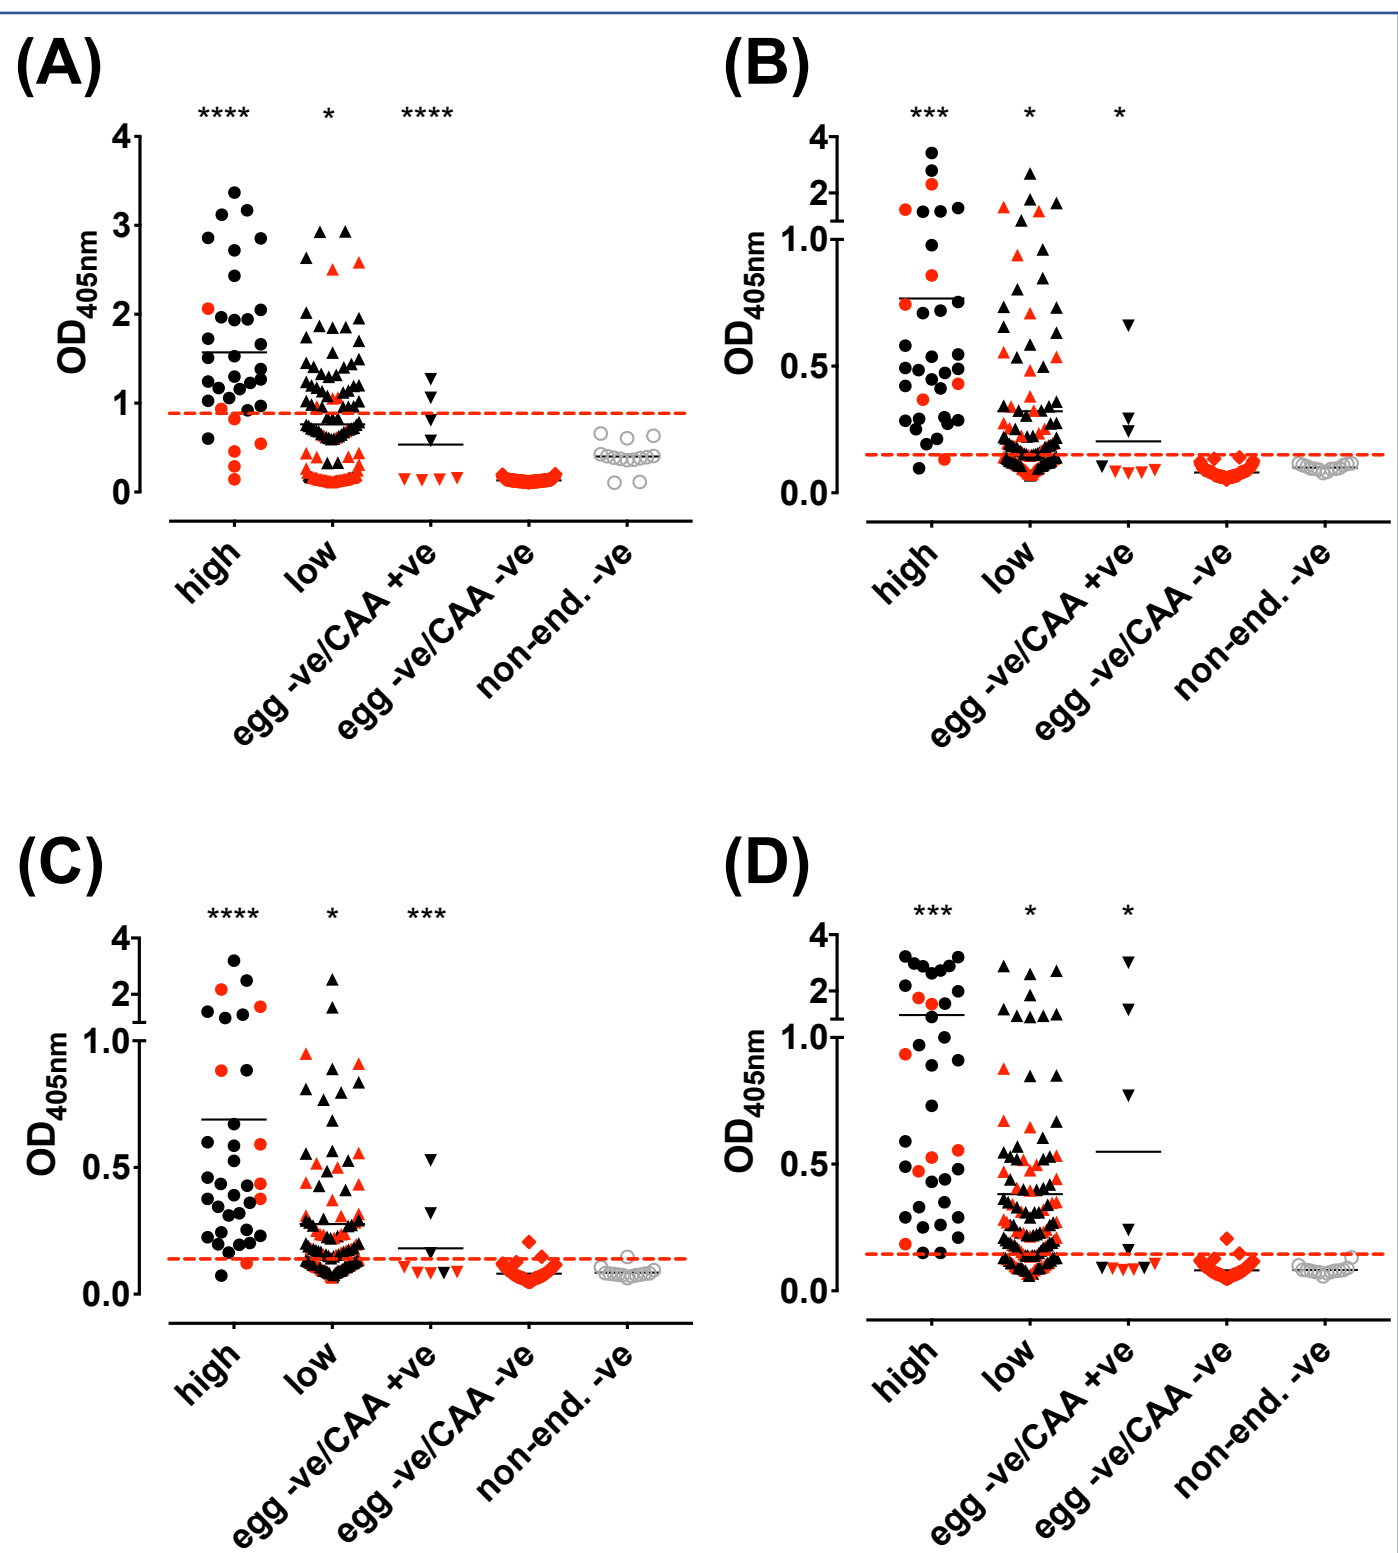

**Table S4: Diagnostic accuracy of antigen combinations using urine of individuals from *Schistosoma haematobium*-endemic populations determined by ELISA.**

| Antigen combination                                 | AUC in cohort (95% CI) |                  |                  |
|-----------------------------------------------------|------------------------|------------------|------------------|
|                                                     | Zimbabwe               | Zanzibar         | All              |
| MS3_10385 + MS3_10186 + MS3_09198                   | 0.94 (0.89-0.98)       | 0.63 (0.48-0.80) | 0.70 (0.61-0.79) |
| MS3_10385 + MS3_09198 + MS3_01370 + <i>Sh</i> -TSP2 | 0.93 (0.87-0.98)       | 0.79 (0.70-0.88) | 0.88 (0.83-0.93) |
| MS3_09198 + MS3_01370 + <i>Sh</i> -TSP2             | 0.94 (0.89-1.00)       | 0.92 (0.85-0.99) | 0.93 (0.87-0.98) |
| MS3_01370 + <i>Sh</i> -TSP2                         | 0.97 (0.93-1.00)       | 0.92 (0.86-0.98) | 0.95 (0.91-0.99) |

**Figure S6. Frequency of recognition (FoR) patterns based on IgG ELISA responses to combinations of cell-based recombinant versions of top-ranked proteins and *Sh*-SEA using urine from infected individuals in *S. haematobium*-endemic populations.** Samples have been sorted from left to right by decreasing egg burden. For each antigen, black bars represent recognition by a sample from the Zimbabwe cohort, red bars represent recognition by a sample from the Zanzibar cohort and white bars denote no recognition (below the cutoff determined by ELISA), regardless of cohort. “Combination 1” = MS3\_10385 + MS3\_10186 + MS3\_09198, “combination 2” = MS3\_10385 + MS3\_09198 + MS3\_01370 + *Sh*-TSP-2, “combination 3” = MS3\_09198 + MS3\_01370 + *Sh*-TSP-2, “combination 4” = MS3\_01370 + *Sh*-TSP-2. FoR percentages among the infected populations (sensitivity) are displayed on the right-hand side of the pattern. “Zim” = Zimbabwe cohort, “Zan” = Zanzibar cohort, “all” = samples from both cohorts combined. To facilitate proper comparison, the dataset has been trimmed to exclude any samples not assayed for all four recombinant antigen combinations (n=148).

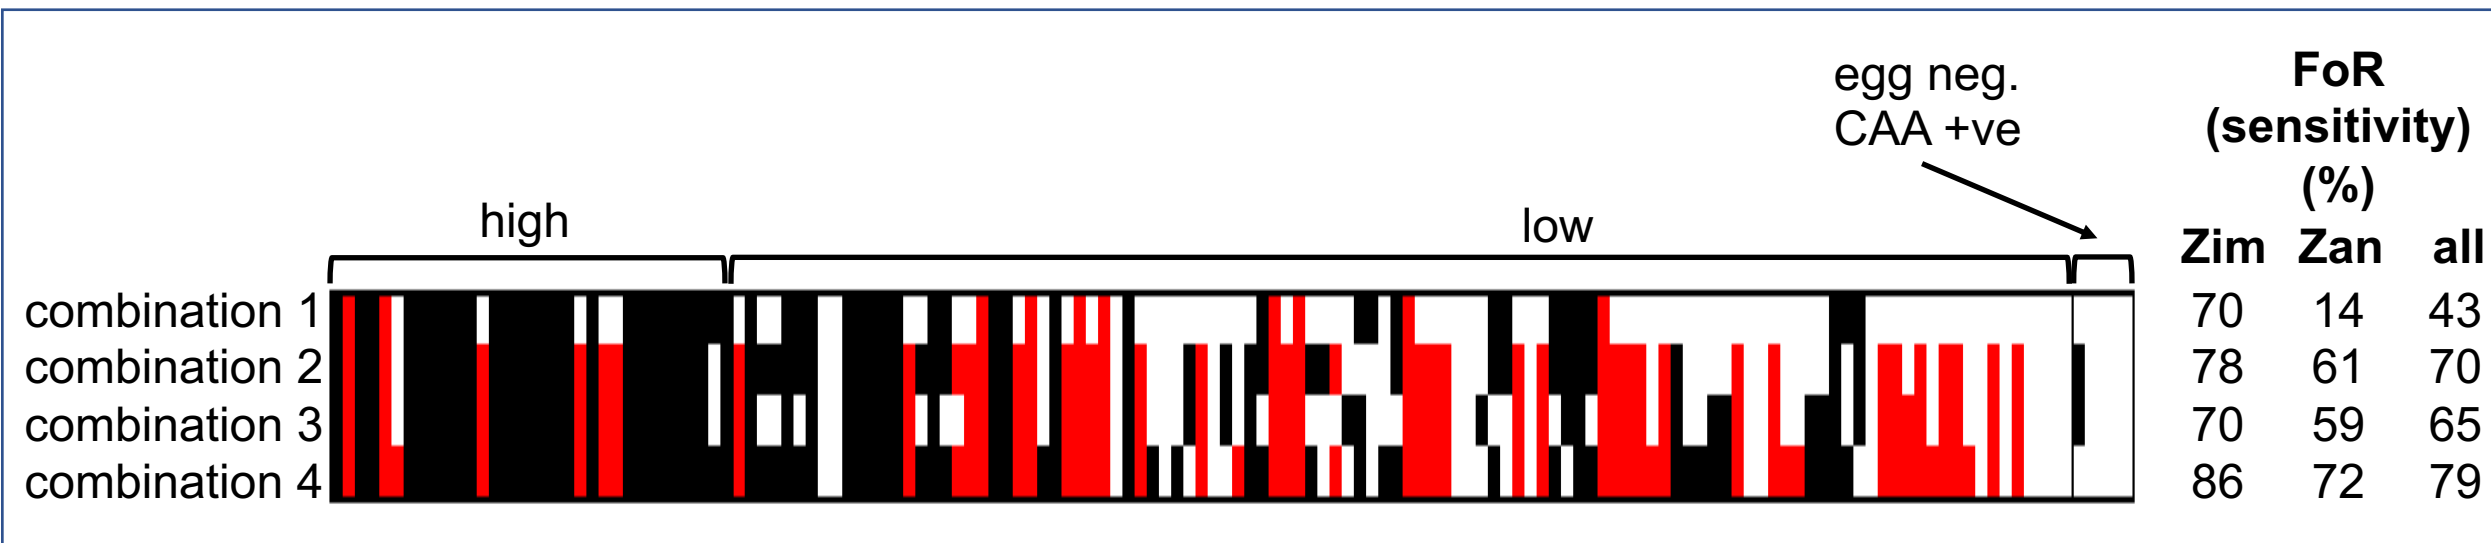

**Figure S7. Serum IgG ELISAs showing recognition of *S. haematobium* diagnostic antigens by other schistosome species.** (A) *Sh*-TSP2. (B) MS3\_01370. “Sh” = *S. haematobium*-infected serum samples from the Gabon cohort used previously in this study. “Sm” = *S. mansoni*-infected serum samples. “Sj” = *S. japonicum*-infected serum samples. “non-end. -ve” = serum samples from a non-endemic area used previously in this study.

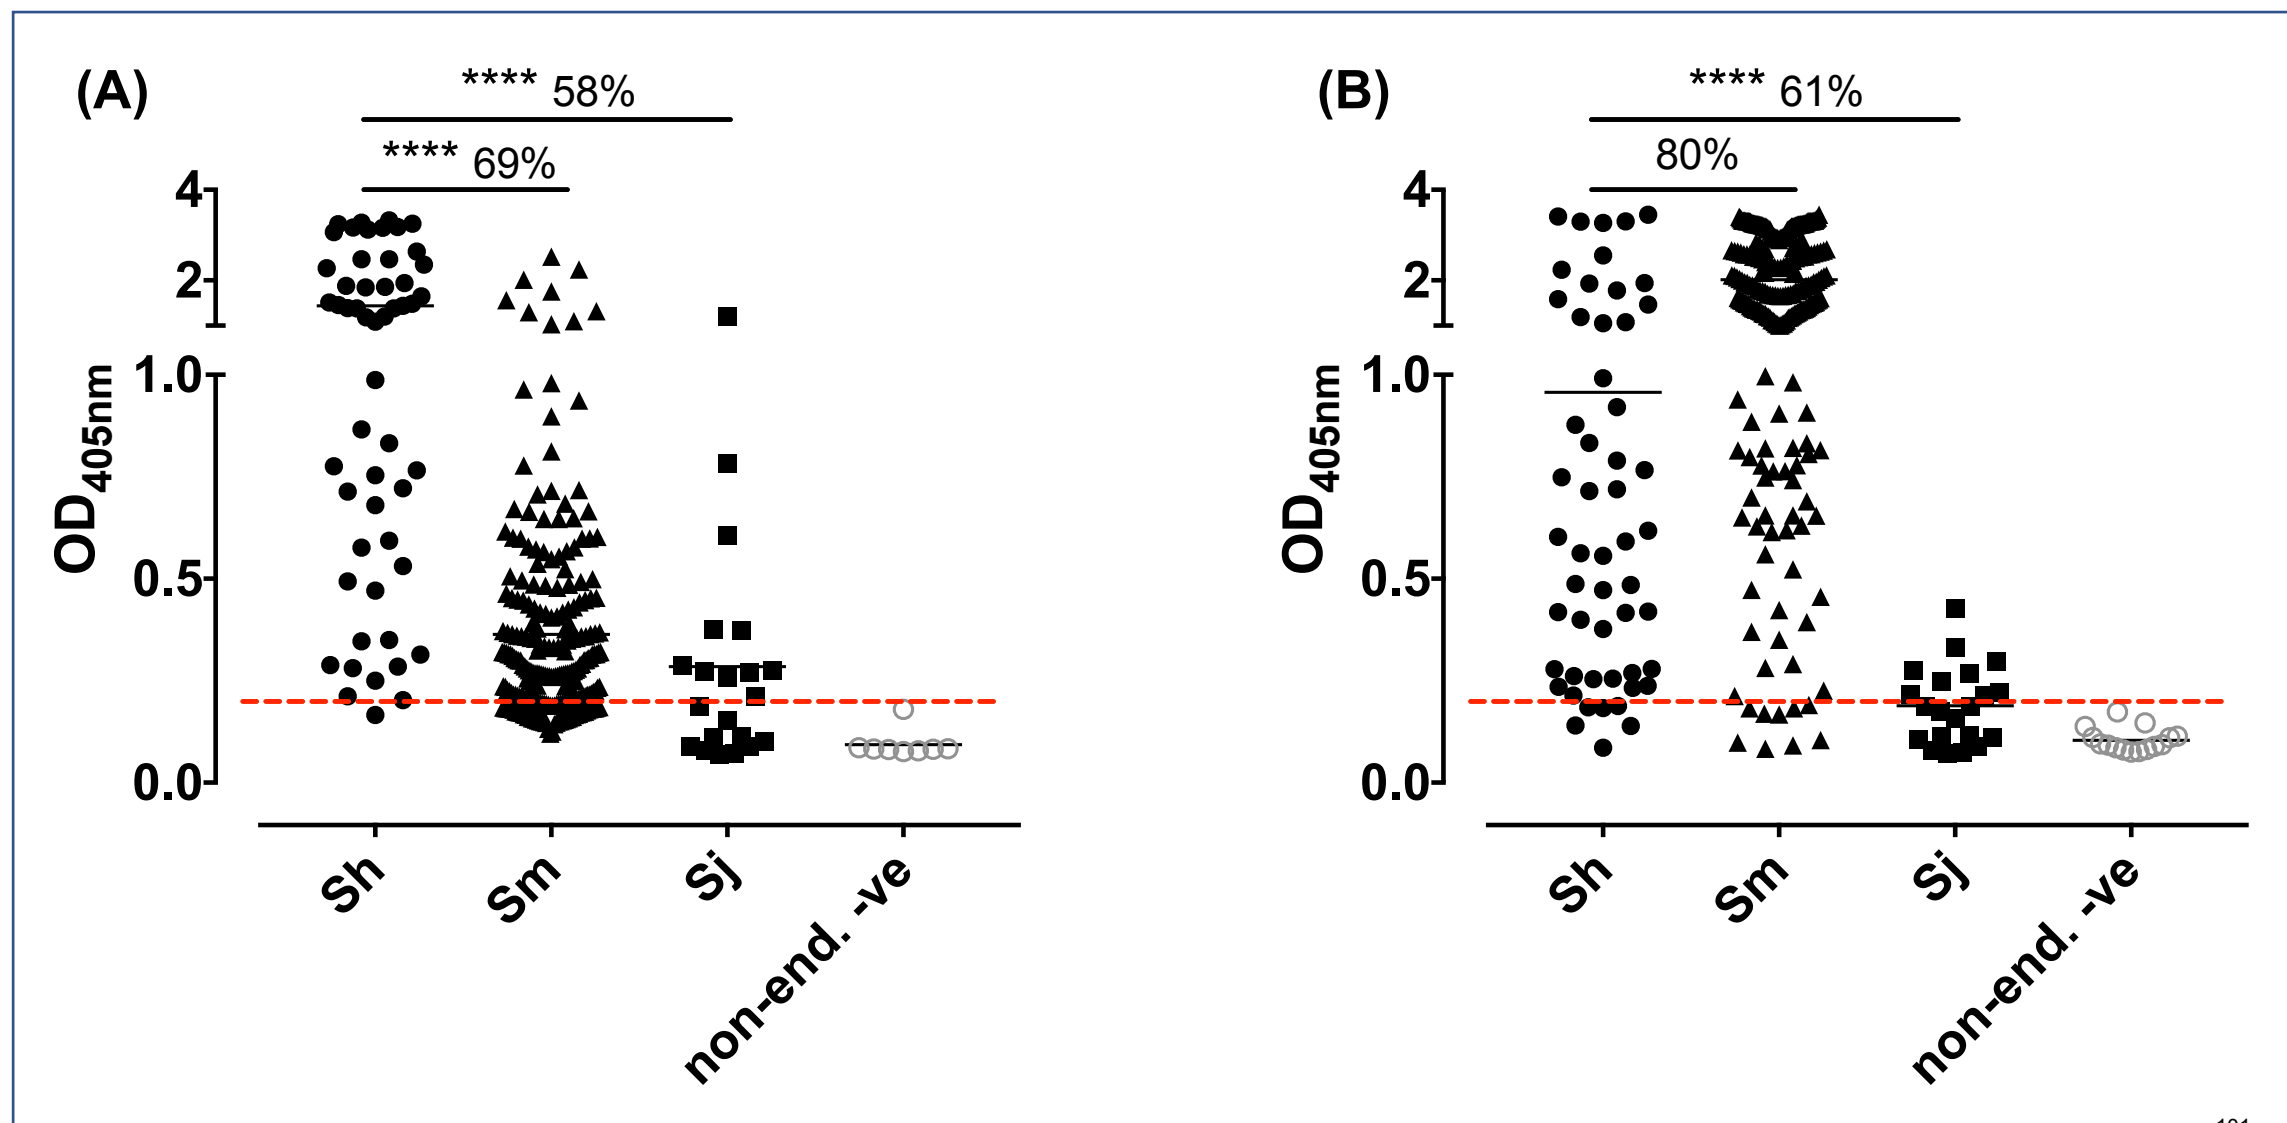

**Figure S8. Amino acid alignment of *S. haematobium* diagnostic antigens and homologs from *S. mansoni*, *S. japonicum* and *H. sapiens*. (A) *Sh*-TSP2. (B) MS3\_01370. (C) MS3\_09198. (D) MS3\_10186. (E) MS3\_10385. (F) Percent homology table of the diagnostic antigens and their homologs. “Sh” = *S. haematobium*, “Sm” = *S. mansoni*, “Sj” = *S. japonicum* and “Hs” = *Homo sapiens*.**

**(A)**

```

Sh 1 EKPVKKHVTDALREFVKEYSHDEHVSQVLDVQOKLQCCGADSSKDYVIPPESCFKDG
Sm 1 EKPVKKHITTSALKKLVQKYRNDDEHVRKVEDEIQOKLHCCGADSPKDYGENPPTSCSKDG
Sj 1 EKPVKRHVTTALKDLVGOYGHDRHLDKVLDEIQDKLQCCGAEAPADYSRGPSPSC---
Hs 1 -EQKLNVEYVAKGLTDSIHRYSNNTKAAWDSIQSFLQCCGINTGSDWTSGPPASCPSPDR

Sh 61 QIFKEGCVKQVSDLSKMH-----
Sm 61 VQFTEGCIKQVSDLSKAH-----
Sj 58 -NYNEGCIQKVTDLTKKHLNATIVT
Hs 60 K--VEGQYAKARLWFHS-----

```

**(B)**

```

Sh 1 --RDEVKQFLSLVKSSVNEYSKNPDKFNFLDKIQQEFQCCGSESSNDYTSSGQ-----
Sm 1 --REDVKTQFLSLVRSVSEYSKNPDKKFLDKIQQEFQCCGSESSNDYTSSGQ-----
Sj 1 --KEDVKTSEVSVVRNSVSEYSKNPDIQNLFDKIOTEKCCGSESSIDYTSIGQ-----
Hs 1 TFRNQTIDFLNDNIRRGLENYDDLDKFNIMDFVQKKEKCCGGEIDYRDWSKNQYHDCSAP

Sh 53 ----TVPDSCKD-----TKTKAIYSDGCSYKVISFFEK-----
Sm 53 ----TTPDSCKN-----PNTKVTYSDGCSNKVISFFEK-----
Sj 53 ----SVPSSCTD-----SDIQLAYQEGCSNKIIAFFEK-----
Hs 61 GPLACGVPYTCIRNTEVVNTMCGYKIDKERFSVQDVIYVRGCTNAVIIIFMDNYTIM

```

**(C)**

```

Sh 1 KDRIDSEIDALMTGALDK--PTPEITEFMDLIQSSFHCCGAKGPODYGNIPASCRGETT
Sm 1 KDRIDSEIDALMTGALDK--PTPEITEFMDLIQSSFHCCGAKGPODYGNIPASCRGETT
Sj 1 --KIDDEINTLMTGALEN--PNEEITATMDKIOTSFHCCGKVPDDYKGNVPASCKEGQE
Hs 1 KDWIRDOENLFINNNVKAAYRDDIDLQNLIDFAQEYWSCCGARGPNDWNLNLYFNCTDLNP

Sh 59 VY-----HEGCVPVFGAFLKR-----
Sm 59 LY-----HEGCVPVFGAFLKR-----
Sj 57 VY-----NOGCLSVFSAFLKRN-----
Hs 61 SRERCVPFSCCVRDPAEDVLNTQCGYDVRLEKLELEQQGFVHTKGCVGOFEKWLQDNLIV

```

**(D)**

```

Sh 1 CKYCLRLYDGTIYENGSYTDVYKSVGSLSP--PWIPGSVCVPLIHDKSKRPPYWRLYEDVN
Sm 1 CKYCLQLYDETYERGSYTEVYKSVGSLSP--PWIPGSVCVPLVNDIKRERPYWYLFQDQVN
Sj 1 PTQCIRLYSIYQTOYFTDLCDSNRMISPLFRWYTRVCSPPSS--ILGNRYWYILYSQFN

Sh 59 YSGKDTAIGHGACIDDFTKSGLKRISSIQKCVYGENGM--VQCIS-ESKRGRKYCRY
Sm 59 YDGRITGLGHGTCIDDFTKSGFKGISIKRCIQTKDGK--VECLN-QPKRRRTYCRF
Sj 60 EHGSIYIIPPCICSDIRRYGLFSISSILRCIRISCFSSIIYCYIPHSHPFWYDPPF

```

**(E)**

```

Sh 1 RTGYQIGKTMRLKSTSSSWNSSEAQQEMKSLYQELNNSLTSEKTFLEKE-ENVVRISTG
Sm 1 KTGHIQIGKATRLKSTSSSWNPFCAQEMKSLYKELNDSLSEKTFIDDEKE-EKVVRISTG
Sj 1 KTSYQIAKTMRLKSANFPWNISETQQEMKSLYKELSDSLTMENTLTDGNE-VKVVRISTG
Hs 1 ETEEQLEKVLHFSHIVDSLKEGFKDSPKCSQAGRIHSEFGVEFSQINQPSNCTLSIANR

Sh 60 IFVQKTYEVERRETESIANDFEGELKQVDFSNRTS-ATVDINDWVDQOSNGLLEKFFTD
Sm 60 LRVQTYELETSEFNESIKNDFEGELIPVNFNRTS-ATLSINRWVDQOSNGLLEKFFTD
Sj 60 VFTQETFDVESNFNOSIKNDFEGELITVDFINQTN-AAQDINKWVNEHNSGLVEEFTD
Hs 61 LYGTKTMAFHQQVLSLSEKWKQARLQTVDFEOSTEETRKTINAWVENKTNQKVANLFGKS

```

```

Sh 119 -IPDDTAMILVNVVYFRDFWQSPFEPHYTRMENFDISSDHQITVHMMIQEGLVMKYGKFED
Sm 119 -IPDDTGMILVNVVYFRDFWESPFEPHYTKIENFDISPNRQIKVPMMKKEEVLHYGKFEN
Sj 119 -IPKDAWMILINIFVFRDYWENPFVPPYTSLENFSVTNNHHLQVPMMSKDEILKYKKEQE
Hs 121 TIDPSVVMVLVNAIYFKGQWQNKQVRETVKSPFQLSEGKVVTVEMMYQIGTFKLAFFVKE

```

```

Sh 178 EGFEIVSKPLNNTREFVIVLPLEKWSLNGATELLNGNKVL-SEYVKNLKETTIVSLRLPK
Sm 178 QGFEIVSKPLNNTREFVIVLPLEKWSLNGATELLNGNKIL-SEYIKKLETTIVSLRLPK
Sj 178 DGFEIVSKPMKNTREFSFIILLPLEKWNLNGATEVLLNGNKIL-SHYVDKLEETSVSLKMPK
Hs 181 PQMQLVLELPIVNNKLSMIIILLVGIANLQIEKQLNSGTFHEWTSSSNMMEREVEVHLPR

```

```

Sh 237 FTLKNTLDLVPTLKSIGVVDLEDPVKSDLSGITPNHNLYVNFQIQTNVFKLINESGIEATT
Sm 237 FTLKNTLDLVPTLKSIGVVDLEDPVKSDLSGITPDHDLVYDFKFMQTNILKINESGIEATT
Sj 237 FTLTKKLLVGLTLKSIGIKNLFDEPKADLSGISKNNLYVNSFIQTNVKVNESGIEAAS
Hs 241 FKLETKYELNSLLKSLGVTDLFNQVKADLSGMSPTKGLYSKAIHKSYLDVSEEGTEAAA

```

```

Sh 297 VTSPIFVPISAIIPVDFHVTHPFICFIYDQQLTMPIMAAKVMNPILOS
Sm 297 VTSPIFVPISAVLPDIDFNVNHFFICFIYDQQLTMPIIAAKVIEPIISS
Sj 297 VTSPITVPISALIPDVNFHVTHPFICFIYDQQLTMPLLAAKVINPML--
Hs 301 ATGDSIA-VKSLPMRAQFKANHPFFIRHHTNTILFCGKIASP----

```

**(F)**

| Antigen         | Identity with <i>S. haematobium</i> (%) |                     |                   |
|-----------------|-----------------------------------------|---------------------|-------------------|
|                 | <i>S. mansoni</i>                       | <i>S. japonicum</i> | <i>H. sapiens</i> |
| <i>Sh</i> -TSP2 | 69                                      | 60                  | 33                |
| MS3_01370       | 80                                      | 61                  | 28                |
| MS3_09198       | 99                                      | 63                  | 27                |
